# Supplementary material for: Tissue of origin dictates GOT1 dependence and confers synthetic lethality to radiotherapy
Source: Cancer Metab. 2020 Jan 2;8:1. doi: 10.1186/s40170-019-0202-2 (PMC6941320; doi:10.1186/s40170-019-0202-2)
Supplement: Supplementary file 2 — Additional file 2. Raw Metabolomic Data. [file 40170_2019_202_MOESM2_ESM.xlsx]

## Sheet: unlabeled
	TU8902 [-dox]#1	TU8902 [-dox]#2	TU8902 [-dox]#3	TU8902 [-dox]#4	TU8902 [+dox]#1	TU8902 [+dox]#2	TU8902 [+dox]#3	TU8902 [+dox]#4	Miapaca [-dox]#1	Miapaca [-dox]#2	Miapaca [-dox]#3	Miapaca [-dox]#4	Miapaca [+dox]#1	Miapaca [+dox]#2	Miapaca [+dox]#3	Miapaca [+dox]#4	8988t [-dox]#1	8988t [-dox]#2	8988t [-dox]#3	8988t [-dox]#4	8988t [+dox]#1	8988t [+dox]#2	8988t [+dox]#3	8988t [+dox]#4	HCT [-dox]#1	HCT [-dox]#2	HCT [-dox]#3	HCT [-dox]#4	HCT [+dox]#1	HCT [+dox]#2	HCT [+dox]#3	HCT [+dox]#4	DLD [-dox]#1	DLD [-dox]#2	DLD [-dox]#3	DLD [-dox]#4	DLD [+dox]#1	DLD [+dox]#2	DLD [+dox]#3	DLD [+dox]#4	HT29 [-dox]#1	HT29 [-dox]#2	HT29 [-dox]#3	HT29 [-dox]#4	HT29 [+dox]#1	HT29 [+dox]#2	HT29 [+dox]#3	HT29 [+dox]#4
1,3-diphopshateglycerate	117041	64533.8	74585.3	145539	58902	145038	110983	149205	54023.3	88637.2	6874.44	44788.4	53528.2	122460	71009.5	96039.7	15038.3	28074	26818.4	19863.5	94050.5	52708.1	30734	25021.2	25948.4	N/A	17002.2	30102.3	5244.12	32910.9	6327.13	15788.7	37127.6	15956.2	10854.4	29642	33094.2	39075.2	73037.9	79654.8	54780	32340.5	59375.7	40883.8	46767.5	49135.2	97576.9	66292.8
1-Methyladenosine	25541.8	20587.8	46916.5	26415.5	52779.5	26067	58378.3	60323.4	40356.4	37971.3	56118.4	71082.9	28345.9	56688.3	51041.7	56757.4	109262	56990.3	45433.8	54257.1	38782.3	27882.3	62492.1	29745.9	114821	55576.8	41986.7	54687.8	55352.8	38479.4	100329	71298.2	49279.4	57199.8	36190.7	58577.3	25497.5	45006.4	32976.8	40864.4	29508	20615.8	33687.3	41091.6	62638.7	35561.3	18810	21180.4
1-Methyl-Histidine	4.23183e+07	4.50536e+07	4.02295e+07	4.33065e+07	3.40283e+07	3.42851e+07	3.50378e+07	3.31305e+07	4.00973e+07	3.74486e+07	4.02876e+07	3.92514e+07	3.98108e+07	3.99509e+07	4.19129e+07	4.01015e+07	5.57293e+07	6.07533e+07	5.99566e+07	5.85985e+07	4.24657e+07	4.15789e+07	4.41938e+07	4.6535e+07	4.94681e+07	5.34258e+07	4.50432e+07	4.46359e+07	4.20089e+07	5.2628e+07	4.30135e+07	5.49545e+07	5.05033e+07	5.92049e+07	5.87279e+07	5.27411e+07	5.35278e+07	4.90345e+07	4.63864e+07	4.59263e+07	3.60537e+07	3.68238e+07	3.11638e+07	3.20426e+07	3.3798e+07	3.8035e+07	3.40185e+07	3.62293e+07
2,3-dihydroxybenzoic acid	N/A	13550.7	35589.3	N/A	10063.6	6714.42	13497.9	9745.21	19823	17799.9	18643.2	17584.1	9098.01	N/A	15588.4	N/A	37193.7	2983.48	22448.2	N/A	12210.2	21359.5	8737.08	6885.55	5485.78	16026.2	34790.1	26668.6	N/A	32287.6	N/A	25025.4	11597.2	16241.9	2581.24	N/A	6157.24	17483.3	22814.7	9309.91	N/A	N/A	11368.2	N/A	4711.99	18468.4	40420.8	20888.1
2,3-Diphosphoglyceric acid	66838.5	137163	107813	117191	126262	58510.2	110722	106561	50653.5	52174.5	28710.7	22377.2	73514	105602	49513.5	64318.6	5330.07	5002.56	9190.61	10715.3	14058.7	28135.4	10033.3	20044.2	9092.78	4756.02	N/A	12192.6	N/A	N/A	6591.4	11282.8	N/A	8750.85	9707.57	8780.13	20712.7	7085.89	25065.2	29200.2	23401.9	20618.9	19474	20613.9	89583.3	70997.9	48405	82960.6
2-Aminooctanoic acid	4.85967e+06	4.62739e+06	4.54676e+06	4.85354e+06	5.76394e+06	5.6031e+06	5.92359e+06	5.5114e+06	5.13029e+06	4.76793e+06	4.36549e+06	4.69946e+06	7.35187e+06	7.41292e+06	7.47819e+06	7.55732e+06	4.99667e+06	5.67159e+06	5.00991e+06	5.28442e+06	4.43153e+06	4.83362e+06	4.59595e+06	4.80132e+06	6.78559e+06	6.86058e+06	6.77673e+06	6.71904e+06	6.00345e+06	6.34841e+06	6.08913e+06	7.11216e+06	9.82347e+06	9.06158e+06	9.17457e+06	9.1328e+06	8.55065e+06	8.79528e+06	8.65291e+06	8.56398e+06	4.02281e+06	4.19045e+06	3.85934e+06	4.02316e+06	3.73819e+06	4.42596e+06	4.05122e+06	3.95136e+06
2-dehydro-D-gluconate	48756.1	67858.6	44299.1	52101.3	56322.5	51431.7	48877	41522.4	67111.5	74775.1	52037.8	66533.6	70729.5	82462.2	76233.8	56846.1	56423.9	72707	79626.3	70829.5	64782.5	70948.9	60253.5	81928.8	53415.8	45024.4	49532.4	37092.4	51710.4	40840.3	27377.8	44160.1	61497.2	71069.5	84383.7	58466.1	54492.1	52601.5	61291.9	54556.1	100290	100890	104015	114976	93386.4	126151	111558	108148
2-deoxyglucose-6-phosphate	4.30907e+06	5.10765e+06	4.70401e+06	4.11536e+06	4.51905e+06	4.87445e+06	4.62978e+06	4.35783e+06	2.03371e+06	2.48333e+06	1.74295e+06	1.46123e+06	5.22712e+06	5.76079e+06	5.15195e+06	5.18449e+06	2.33834e+06	2.51847e+06	2.68547e+06	3.06754e+06	250241	234969	263581	299336	344787	670698	299924	510683	361525	348130	450704	593455	2.68486e+06	1.3913e+06	2.69563e+06	1.89906e+06	1.11885e+06	1.29189e+06	1.16099e+06	1.10289e+06	224942	207654	163486	147387	211085	227916	207401	225376
2-Hydroxy-2-methylbutanedioic acid	1.19686e+06	946668	962571	1.05764e+06	1.0154e+06	897081	879860	879626	842332	639079	758516	776797	793564	682264	699385	617098	1.42636e+06	1.26545e+06	1.28669e+06	1.25115e+06	645206	558956	518479	616248	656043	771622	731671	826231	763132	565268	541220	781603	4.38503e+06	3.78691e+06	4.31959e+06	4.49443e+06	3.83221e+06	3.45552e+06	3.58641e+06	4.13386e+06	913467	932409	1.27988e+06	872244	1.05651e+06	788444	896621	1.13398e+06
2-hydroxygluterate	3.45322e+06	3.47364e+06	2.74141e+06	3.2982e+06	2.73576e+06	3.02996e+06	2.74219e+06	2.8318e+06	2.12191e+06	1.94998e+06	1.70555e+06	1.83911e+06	2.10534e+06	1.84071e+06	2.07375e+06	2.04427e+06	3.41648e+06	3.38253e+06	4.04143e+06	3.136e+06	1.02786e+06	989513	952746	1.11427e+06	1.13926e+06	1.51798e+06	1.12988e+06	1.44107e+06	1.40216e+06	1.32425e+06	1.19744e+06	1.32164e+06	8.39185e+06	8.39077e+06	8.80264e+06	8.55641e+06	7.69128e+06	6.63353e+06	6.78143e+06	7.70431e+06	1.39094e+06	1.56043e+06	1.68991e+06	1.72935e+06	1.76017e+06	1.46004e+06	1.53146e+06	1.66187e+06
2-Isopropylmalic acid	471633	635007	531576	522009	397402	465617	427843	467646	2.47878e+06	2.28158e+06	2.28805e+06	2.3121e+06	1.70129e+06	1.66987e+06	1.6666e+06	1.77214e+06	1.43795e+06	1.5629e+06	1.42669e+06	1.50879e+06	900963	987953	902760	800155	1.5914e+06	1.54203e+06	1.57362e+06	1.49138e+06	1.42025e+06	1.44766e+06	1.35477e+06	1.39187e+06	975339	1.03739e+06	1.042e+06	935799	1.026e+06	774694	926095	873279	253749	252078	247587	259029	239259	253600	250815	218892
2-ketohaxanoic acid	168415	132098	170197	189223	153715	156144	172741	153880	100619	107029	85966.9	96928.4	112349	104382	98580.5	111669	190969	176576	152954	152741	69684.7	60624.8	64407.3	56585.5	52681	86185.8	47167.5	77144.9	84444.5	85311.6	62750	61821.6	586896	510443	532498	566157	434125	464107	467450	524537	83727.5	104864	92212.4	110656	100497	95285.9	91414.5	110609
2-keto-isovalerate	4.00905e+06	4.09001e+06	3.99789e+06	3.39518e+06	8.61336e+06	8.29954e+06	8.42096e+06	8.54027e+06	5.44089e+06	5.10436e+06	5.08239e+06	5.14753e+06	9.28903e+06	9.12741e+06	9.07931e+06	9.26882e+06	3.48594e+06	3.23468e+06	3.38461e+06	3.30001e+06	4.79105e+06	4.12557e+06	4.73184e+06	4.21602e+06	3.71542e+06	4.74434e+06	3.21246e+06	3.92681e+06	4.59206e+06	4.57787e+06	4.43527e+06	4.73715e+06	4.95366e+06	3.9749e+06	4.28657e+06	4.35703e+06	4.39265e+06	4.60603e+06	4.11034e+06	4.36954e+06	2.98092e+06	2.5899e+06	2.88799e+06	2.66188e+06	3.63525e+06	3.18035e+06	3.5055e+06	3.14021e+06
2-oxo-4-methylthiobutanoate	9862.99	7548.81	N/A	7088.68	N/A	9614.47	N/A	8882.68	4425.17	5366.98	11032.4	6947.34	5730.46	10175.4	4627.73	6048.5	4788.48	13665.3	10221.3	6086.65	5249.03	6760.02	2900.33	3760.39	14829.8	N/A	13330.9	8231.16	6846.07	6225.68	N/A	6970.88	13776.9	8639.58	9428.24	10303.7	N/A	13335.8	10036.6	4281.58	4489.86	N/A	7083.81	N/A	7848.05	3740.98	8037.32	4683.4
2-oxobutanoate	640240	640397	607196	625548	318815	370270	312610	359357	453073	413407	401969	433236	218803	283582	235633	250278	678493	639632	805867	772217	268833	240188	375875	214712	381356	447033	318600	390649	313446	380262	309801	374729	776213	592426	753664	610976	550826	530250	539912	619569	462533	538822	481781	467275	488708	509101	507425	472393
3-hydroxy-3-methylglutaryl-CoA-nega	5375.36	5914.16	10216.4	7527.42	4304.34	8064.24	5914.13	5379.9	N/A	N/A	N/A	N/A	8603.01	N/A	N/A	N/A	N/A	N/A	N/A	N/A	5923.03	9679.18	13978.3	5378.54	N/A	N/A	N/A	N/A	N/A	N/A	N/A	N/A	N/A	N/A	4837.75	N/A	7527.39	5915.82	12368.8	14526.6	3224.85	N/A	5376.91	3226.51	4305.15	5913.86	8065.97	8603.15
3-hydroxybuterate	21292.3	32519.2	38260.3	21208.1	19668	12188.4	15444.4	16068.4	18445.2	N/A	N/A	49567.9	33250	15756.8	52354.7	N/A	32533.3	26859.2	N/A	29962.6	48711.9	29739	38660	37671.3	49578.8	31962.6	27127.6	21328.2	N/A	18181	26256.8	25522	45390.9	30615.4	33532.2	31133.4	33508.1	29599.6	32861.4	32497.6	78780.2	66424.6	65634.6	25574.5	31966.2	33625.5	N/A	N/A
3-hydroxybutyryl-CoA	N/A	N/A	N/A	N/A	4300.77	N/A	N/A	N/A	3763.6	N/A	N/A	N/A	N/A	N/A	N/A	N/A	N/A	N/A	N/A	N/A	N/A	N/A	N/A	N/A	N/A	N/A	N/A	N/A	N/A	N/A	N/A	N/A	N/A	N/A	N/A	N/A	3226.26	N/A	3224.88	N/A	N/A	N/A	N/A	N/A	N/A	N/A	N/A	3226.34
3-methylphenylacetic acid	144886	134517	132101	70697.7	154495	131885	128246	79320.9	148604	131051	144180	73602	88200.2	76834.4	47790.3	163232	118860	105617	129504	128460	72185.2	116852	47352.1	130484	92133.9	113250	139237	106527	167563	183652	80243.6	86237	115584	107250	237256	131037	97795.6	88379.6	93177.1	96068.6	121604	207374	112221	121597	91638.2	127432	119966	122214
3-phosphoglycerate	674869	497952	483668	466088	871772	923102	801022	691277	501689	573014	334086	477934	696839	691313	641090	678884	185421	298658	235028	165340	837288	723180	788069	1.02807e+06	106637	146926	126476	131441	252561	194069	181572	422483	231728	220113	253822	230492	439856	608445	602904	627227	189184	256222	236811	289047	665817	303676	390058	365610
3-phospho-serine	4041.21	N/A	4194.41	6289.08	5707.67	N/A	N/A	N/A	48421.7	74176.8	39679.4	42562	7808.42	4136.13	N/A	3519.79	11428.1	19317.9	23764.5	14201.7	13233.8	27917.4	15992	13397.3	22630.7	30341.6	32273.5	27737.5	43847.8	38056	43289.8	31325.7	40287.7	51465.5	38853.7	51969.6	54599.1	86297.2	87937.8	76339.9	9442.98	15778.4	10000.4	14759.5	15568.7	6436.53	10135.9	7086.19
3-S-methylthiopropionate	N/A	N/A	N/A	N/A	N/A	N/A	N/A	N/A	N/A	N/A	N/A	N/A	N/A	N/A	N/A	4299.87	N/A	N/A	2640.85	N/A	N/A	N/A	4154.92	4825.85	N/A	N/A	N/A	N/A	N/A	N/A	N/A	N/A	N/A	N/A	N/A	N/A	N/A	N/A	4409.05	N/A	N/A	N/A	N/A	N/A	5836.56	N/A	N/A	N/A
4-aminobutyrate	2.93193e+06	2.81619e+06	2.55267e+06	2.85265e+06	4.58523e+06	4.64125e+06	4.23752e+06	4.34982e+06	442584	395377	375662	397267	559023	540880	534641	585425	1.14906e+06	1.10425e+06	1.12226e+06	1.03675e+06	1.18708e+06	981767	1.22437e+06	1.26564e+06	903292	1.10079e+06	991128	1.05157e+06	1.02139e+06	1.0927e+06	828998	1.18113e+06	2.35151e+06	2.18065e+06	2.15454e+06	2.10458e+06	1.93529e+06	1.93586e+06	1.87182e+06	1.94611e+06	1.51909e+07	1.5105e+07	1.53522e+07	1.52963e+07	1.52843e+07	1.48953e+07	1.44406e+07	1.56755e+07
4-phosphopantothenate	4305.27	4829.67	5369.97	2678.87	6988.88	11274.6	6989.98	10760	5359.73	3833.07	6990.05	7573.48	6308	13989.1	4308.93	14647	12010.8	6998.87	N/A	6761.96	19634.7	11302	22571.7	11248.5	N/A	8036.78	6666.44	N/A	6454.88	8594.68	7327.17	N/A	20976.6	10252.5	9503.34	18045.7	10760.7	8389.38	5068.51	10211.8	7041.34	8584.79	6950.63	8249.86	5906.1	6541.6	N/A	10201.5
4-Pyridoxic acid	13958	24117.9	28367.6	20926.3	13880.4	11557.8	17584.6	12758.5	16508.8	8029.85	6591.39	14635.1	17241.5	8721.57	20490.8	21128.8	18644.1	13217.1	76837.1	25344.6	21235.6	19758.6	10246.9	33665.5	58292.7	31218.5	11213.7	7129.01	15492.4	18478	18529.4	20839.8	28786.2	6738.36	46003.3	25965.7	17619.5	14154.8	18339.6	15448	20086.9	28978.3	18443.5	20979.6	30315.6	13222.5	10811.7	33843.9
5-methoxytryptophan	8988.62	12260.8	15273	8886.31	11654.1	5421.17	7083.31	7622.28	15095.1	8306.41	8326.3	14508	8573.37	12274.5	9408.9	6375.1	8130.08	10232.8	16571.2	17546.1	7425.19	7956.48	12746.7	10412.5	28112.1	30720.5	27563.6	28099.6	20703.6	24282.4	27192.6	25213.3	10031.7	20666.3	10630.8	10889.6	14345.5	12692.8	4303.63	5273.4	11278.7	10254.2	7517.99	7213.15	11810.1	8931.89	12683	12612.2
5-methyl-THF	14891.3	8145.7	19175.9	15102.4	6833.54	14947.8	12852.2	6538.44	8677.02	10707.3	11387.9	9618.74	15746.7	13508.7	15540	20936.8	11714.2	9191.15	29027.6	14059.4	13113.8	7515.74	14725.3	6168.58	11301.3	8551.69	13812.5	14068.9	19721.8	17758.9	6194.29	25608	36547.7	31914.3	61680.3	46209.5	24104.7	34750.3	25921.9	24218.9	10634.3	16850.3	13569.1	13290.5	16032.8	12388	10861.2	13410.8
5-phosphoribosyl-1-pyrophosphate	322961	376411	377878	422304	240218	159069	220893	157315	14049.7	N/A	N/A	9531.2	11195.6	58021.4	5780.79	4734.32	7375.98	65867.9	66217	9511.67	212112	209991	196489	158317	55376.1	49107.1	64898.4	90897.5	45719.1	43242.2	45427	25431.7	27656.7	17566.9	56026.1	35393.6	190997	182945	192143	199919	284262	207782	243728	217331	206502	270814	273072	243698
6-phospho-D-gluconate	13067.8	13523.1	15665.1	22037.8	31098.3	21585.1	22570.5	18806	6353.33	4887.02	13200.2	5266.53	13592.6	12844.3	10239.2	16933.4	9185.63	4936.91	15552.3	10178.7	19996.5	16153.5	12427	18396	3746.07	4295.71	6477.44	13901.5	3765.6	5914.02	5739.14	4845.6	19418.6	34895.8	21793.3	16879.7	41958.8	25443.8	35997	25238.6	12279.7	20654.1	18579.2	23192.8	28532.7	23105	30570.4	37067.4
7,8-dihydrofolate	N/A	N/A	N/A	N/A	N/A	N/A	N/A	N/A	N/A	N/A	N/A	N/A	N/A	N/A	N/A	N/A	N/A	3226.53	N/A	N/A	N/A	N/A	3226.54	N/A	N/A	N/A	N/A	N/A	N/A	N/A	N/A	N/A	N/A	N/A	N/A	N/A	5915.64	4300.63	N/A	2689.14	N/A	N/A	N/A	N/A	N/A	N/A	N/A	5376.86
7-methylguanosine	585247	355770	350295	251077	263245	598750	381485	341511	597432	493389	512331	543637	718669	584022	594117	647105	637397	734979	775634	705390	742096	751315	721950	991045	547774	596897	607889	525199	525866	605961	543252	658424	617325	610247	630592	586146	622993	570025	501628	598725	571573	646669	597376	583632	682612	633905	633365	661446
acadesine	575322	641127	565323	541886	196251	300055	327952	313563	20074.5	17780.4	20850.5	12508.9	39191.6	29111.5	37493.7	35501.2	627729	706082	646159	732937	806048	870063	788187	913861	35253.8	54832.2	48111.9	43965.1	54730.2	46175.3	44431	48433.9	34953.9	24246.6	28887.3	26659.9	26602	28816.8	13978.6	26136.6	5305.77	19358.9	9248.87	5917.87	13424.7	20140.4	10416.2	20279.5
acetoacetate	565113	607678	624629	623236	334220	329676	343933	397680	401760	493256	368884	380862	222978	233099	212753	218374	672176	626452	800616	709995	222574	233155	333358	279416	369258	391787	308293	402816	288834	340934	322705	332927	752745	509271	708837	578473	540268	481952	578945	520392	468418	455944	515487	460738	454100	458014	447138	501852
acetoacetyl-CoA-nega	N/A	N/A	N/A	N/A	N/A	N/A	N/A	N/A	N/A	N/A	N/A	N/A	N/A	N/A	N/A	N/A	N/A	N/A	N/A	N/A	N/A	N/A	N/A	N/A	N/A	N/A	N/A	N/A	N/A	N/A	N/A	N/A	N/A	N/A	N/A	N/A	N/A	N/A	N/A	N/A	N/A	N/A	N/A	N/A	N/A	N/A	N/A	N/A
acetoacetyl-CoA-posi	N/A	N/A	2689.1	N/A	N/A	N/A	N/A	4302.28	N/A	2686.28	N/A	N/A	N/A	N/A	N/A	N/A	N/A	N/A	N/A	N/A	12905.7	N/A	17206.1	3762.29	7523.16	4298.1	6991.3	10216.2	N/A	5377.74	4302.41	6454.67	13442.9	18281.5	43555.4	12906.5	33318.4	20431.8	31148.6	35488.8	120930	158082	191909	120272	131595	226675	172595	255499
Acetylcarnitine DL	4.05352e+07	4.48382e+07	4.2373e+07	4.307e+07	4.61835e+07	4.18512e+07	4.08417e+07	5.31751e+07	4.19525e+07	3.5476e+07	4.82758e+07	3.65425e+07	4.27038e+07	4.03972e+07	4.27242e+07	4.13692e+07	3.99654e+07	4.30504e+07	4.30001e+07	4.36266e+07	2.62141e+07	2.82487e+07	2.56472e+07	2.82378e+07	4.15846e+07	4.15165e+07	4.26383e+07	4.73461e+07	3.75948e+07	4.41565e+07	4.28313e+07	4.03609e+07	4.48933e+07	4.01013e+07	4.70892e+07	4.0637e+07	3.86923e+07	3.82089e+07	2.76358e+07	3.72238e+07	4.45042e+07	4.70145e+07	4.64783e+07	4.1695e+07	4.54704e+07	4.72868e+07	4.56502e+07	4.57471e+07
acetyl-CoA-nega	N/A	N/A	N/A	N/A	N/A	N/A	N/A	N/A	N/A	N/A	N/A	N/A	N/A	N/A	N/A	N/A	N/A	N/A	N/A	N/A	N/A	N/A	N/A	N/A	N/A	N/A	N/A	N/A	N/A	N/A	N/A	N/A	N/A	N/A	N/A	N/A	N/A	N/A	N/A	N/A	N/A	N/A	N/A	N/A	N/A	N/A	N/A	N/A
acetyl-CoA-posi	N/A	N/A	N/A	6131.8	2903.78	33874.3	3549.12	48073.5	N/A	2579.83	18067.7	N/A	2903.84	27738.9	7399.49	14519.2	N/A	N/A	N/A	N/A	11049.9	19673.3	14194.7	8388.54	N/A	N/A	2903.84	N/A	N/A	N/A	N/A	N/A	N/A	N/A	9356.65	N/A	9356.94	N/A	12258.9	9679.45	N/A	N/A	4517.12	8066.32	6772.92	5484.78	7741.82	2577.28
Acetyllysine	3.21526e+07	3.48601e+07	2.92791e+07	2.17914e+07	2.69879e+07	2.96441e+07	2.38048e+07	3.18451e+07	2.66095e+07	4.84549e+07	4.00096e+07	2.86754e+07	5.05731e+07	4.36037e+07	3.86843e+07	4.67002e+07	2.47505e+07	2.83676e+07	4.64557e+07	4.38298e+07	1.42202e+07	3.04776e+07	2.73052e+07	4.26404e+07	3.58827e+07	3.80357e+07	3.96357e+07	3.53921e+07	2.6628e+07	5.13128e+07	3.59418e+07	2.43173e+07	4.90996e+07	3.73886e+07	2.55286e+07	4.47948e+07	4.1464e+07	4.41038e+07	4.0895e+07	4.44047e+07	1.17234e+07	2.09151e+07	2.16294e+07	2.32251e+07	2.10293e+07	1.92261e+07	2.28268e+07	2.49315e+07
acetylphosphate	66057	56715	38811.6	81354.7	80090.6	74585.2	50084.9	57653.1	29824.4	41328	49220.2	31114.4	34290.5	53983.5	24586.1	26067.5	27966.2	29093.7	22881.1	216670	47583	57836.9	32355.5	23662	63008.6	47019.4	51271.5	41572.6	52568.2	39382.8	43045.5	46467	248468	303082	255494	237266	254036	275007	225524	252236	63125.7	86124.5	79541.2	142619	79203.7	92267.3	79178.2	92394.2
aconitate	1.09625e+06	1.12798e+06	1.21517e+06	1.08778e+06	198335	243383	604646	449887	1.01606e+06	937772	996536	1.07997e+06	973483	866901	956298	745025	2.9146e+06	3.02174e+06	2.98512e+06	2.57785e+06	585787	722033	488542	679676	1.46346e+06	1.35562e+06	1.11847e+06	1.47521e+06	1.26541e+06	1.50625e+06	782576	1.20042e+06	1.67081e+06	1.95452e+06	1.73744e+06	1.58872e+06	1.31546e+06	1.27045e+06	1.24193e+06	1.50614e+06	914676	1.35145e+06	790600	1.18221e+06	991495	872415	807717	751652
adenine	1.24005e+07	1.23779e+07	1.23424e+07	1.23108e+07	9.36154e+06	9.70969e+06	1.06509e+07	1.01771e+07	1.17087e+07	1.18938e+07	1.06767e+07	1.14484e+07	1.04494e+07	1.01112e+07	1.08247e+07	9.48139e+06	1.3311e+07	1.09144e+07	1.22151e+07	1.27199e+07	1.20961e+07	1.24922e+07	1.14631e+07	1.1649e+07	1.26679e+07	1.32212e+07	1.26324e+07	1.13094e+07	1.07114e+07	1.07813e+07	1.09531e+07	1.16155e+07	1.16547e+07	1.25768e+07	1.3128e+07	1.12381e+07	1.10292e+07	1.09852e+07	1.04021e+07	1.0719e+07	9.39111e+06	8.56302e+06	8.90772e+06	9.29524e+06	9.44119e+06	9.99686e+06	1.00523e+07	1.06531e+07
adenosine	1.80325e+06	1.03138e+06	3.00561e+06	1.20481e+06	688409	458469	888889	2.53293e+06	5.48388e+06	4.49836e+06	1.0233e+07	6.21775e+06	266036	1.22917e+06	615449	400314	3.19016e+06	536920	977996	4.20023e+06	398778	397842	307315	433126	1.93553e+06	307252	235737	303044	234954	275967	200376	316310	788227	435268	467841	471689	509034	1.02316e+06	1.33416e+06	572520	537427	686744	712586	1.41116e+06	1.0591e+06	661077	495139	494966
adenosine 5-phosphosulfate	19683.3	20774	15636.6	41868.9	4800.49	46784	37643.3	39776.5	9358.49	27121.4	24539.4	6779.41	21963.7	17652.2	24197.2	26900.6	19894.5	6388.44	13812.4	5984.6	51650.3	41863.2	51766.5	45793.1	37641.2	74760.4	46247	97324	25826.5	23081.8	9789.27	30106.9	67755.3	43586.1	119549	66136.1	39172.8	46914.5	48334.3	50083.2	39832	207415	203780	190270	38703.1	51618.6	45632.2	40274.8
Adenylosuccinate	42483.5	51625.4	41407	25810.5	25811.8	33332.5	24737.6	36029	13983.2	24711.4	5913.93	N/A	121025	140348	85504.6	86037.4	38180.7	46243.1	38179.3	29584.5	70984	82767.5	124758	129588	3763.68	6450.83	10235.6	9669.06	9679.48	13107.3	8612.18	8066.3	91418.5	37112.4	63988.7	67214.4	104858	111314	111312	122602	64532	78510.7	81735.7	77975	84965.6	48103.8	62378.2	92490.1
ADP-D-glucose	4190.41	3759.87	8067.72	N/A	5368.85	4839.53	12365.6	N/A	N/A	N/A	N/A	N/A	N/A	4303.49	N/A	N/A	N/A	N/A	N/A	N/A	N/A	N/A	N/A	N/A	N/A	N/A	N/A	N/A	2673.95	N/A	N/A	N/A	N/A	N/A	N/A	N/A	N/A	7530.26	N/A	N/A	N/A	N/A	N/A	N/A	N/A	N/A	3762.01	5378.35
ADP-nega	4.98554e+06	7.17019e+06	7.44031e+06	7.37489e+06	7.73334e+06	8.04592e+06	7.88587e+06	7.84427e+06	5.89483e+06	6.12174e+06	4.96692e+06	4.51094e+06	9.60293e+06	8.6794e+06	7.90129e+06	7.86807e+06	1.29318e+06	1.63698e+06	1.52691e+06	1.91279e+06	8.89137e+06	8.06806e+06	7.95228e+06	8.05936e+06	2.87737e+06	3.02619e+06	2.3126e+06	3.65224e+06	2.20113e+06	2.09363e+06	2.16626e+06	2.56404e+06	3.28928e+06	4.33152e+06	4.78292e+06	4.32982e+06	7.87506e+06	9.01608e+06	7.7206e+06	8.01665e+06	8.95595e+06	7.49374e+06	7.37488e+06	8.12867e+06	9.38166e+06	9.63706e+06	9.05976e+06	8.10896e+06
a-ketoglutarate	5.09963e+06	5.63075e+06	4.73895e+06	4.94142e+06	6.30683e+06	5.58008e+06	5.65767e+06	5.77548e+06	1.40685e+06	1.43547e+06	936259	1.48293e+06	3.60796e+06	3.43723e+06	2.93449e+06	3.58635e+06	1.4898e+06	1.42581e+06	1.69261e+06	1.64747e+06	149739	103933	139457	116807	356671	628669	377901	476744	300115	328418	335162	337633	2.07139e+06	1.25948e+06	1.65899e+06	1.45724e+06	820451	1.25743e+06	989065	863559	219754	174510	290819	212107	279090	259865	261255	173011
alanine	5.42655e+07	5.2823e+07	5.15802e+07	5.15596e+07	2.83601e+07	3.04562e+07	3.11108e+07	2.97438e+07	6.14724e+07	6.38558e+07	6.17129e+07	5.91645e+07	5.35171e+07	5.51492e+07	5.55233e+07	5.41802e+07	3.71873e+07	3.71887e+07	3.60804e+07	3.61146e+07	1.25679e+07	1.20284e+07	1.24853e+07	1.16097e+07	5.37616e+07	5.9444e+07	5.54717e+07	5.68449e+07	5.51562e+07	5.72808e+07	5.53508e+07	5.21143e+07	5.90908e+07	5.72206e+07	5.89979e+07	5.91656e+07	5.55367e+07	5.72361e+07	5.2493e+07	5.32036e+07	6.15824e+07	6.40059e+07	6.23098e+07	6.25237e+07	5.8611e+07	5.88343e+07	5.56169e+07	5.64076e+07
allantoate	245040	264950	291818	256933	287215	310916	322522	363737	204923	183160	171513	190878	198830	165538	211097	181119	179588	196807	198496	209737	252648	259792	208393	191688	179776	212138	185879	196423	259073	274787	233364	263983	711964	629795	562937	672158	367689	364208	381644	332342	172051	283204	213070	332425	229125	277439	229605	252230
allantoin	1.65295e+06	1.73006e+06	1.57529e+06	1.43746e+06	1.28944e+06	1.47396e+06	1.27388e+06	1.45182e+06	2.37676e+06	2.44809e+06	2.14232e+06	2.46661e+06	2.75651e+06	2.5709e+06	2.12112e+06	2.514e+06	2.01818e+06	2.06856e+06	2.11734e+06	1.85545e+06	2.08168e+06	2.08887e+06	2.22384e+06	2.28965e+06	1.4498e+06	1.4439e+06	1.50578e+06	1.39015e+06	1.27138e+06	1.22075e+06	1.21232e+06	1.28461e+06	1.723e+06	1.64748e+06	1.87077e+06	1.91959e+06	1.38295e+06	1.42399e+06	1.25968e+06	1.38704e+06	1.63509e+06	1.81906e+06	1.85968e+06	1.68386e+06	1.48628e+06	1.5082e+06	1.44634e+06	1.69177e+06
Aminoadipic acid	2.00333e+06	2.46398e+06	1.78105e+06	2.02617e+06	2.16193e+06	2.13165e+06	2.21395e+06	2.10468e+06	367452	384415	366501	383516	347818	384890	420138	425004	1.69599e+06	1.49697e+06	1.64051e+06	1.36915e+06	605205	566321	527075	585342	702783	567940	634029	684565	547305	587283	573816	638749	5.90837e+06	7.33347e+06	6.21151e+06	6.32341e+06	6.12534e+06	4.79011e+06	4.43028e+06	5.54244e+06	209573	250431	225502	241798	228321	226732	238358	227007
aminoimidazole carboxamide ribonucleotide	2.40201e+06	2.76724e+06	2.15304e+06	2.52763e+06	1.55769e+06	2.10947e+06	2.14613e+06	2.13238e+06	8074.92	6479.71	8582.85	3745.65	24754.8	25381.7	9861.96	18742.9	3.8532e+06	3.86476e+06	3.58054e+06	4.48691e+06	19340.1	5852.6	11282.6	21176.7	31988	42478.9	22200.2	42162.3	37652.8	38587.2	27923.7	46777.8	140523	89305.7	114424	104819	71406.7	66581	56981.6	52736.4	9640.33	4300.89	10211	14540	5435.57	22544.5	4499.13	9630.12
AMP	2.03099e+06	3.23079e+06	4.09134e+06	3.56651e+06	4.97415e+06	4.88576e+06	5.43262e+06	5.51709e+06	3.81747e+06	4.70022e+06	3.41037e+06	3.97875e+06	8.08645e+06	5.43715e+06	7.04593e+06	6.86787e+06	1.6742e+06	1.85468e+06	2.0166e+06	1.67151e+06	1.14923e+07	1.25843e+07	9.86037e+06	9.01878e+06	3.12942e+06	3.29506e+06	2.56762e+06	4.23003e+06	3.94544e+06	3.38086e+06	3.10434e+06	3.16599e+06	4.62363e+06	6.02488e+06	6.29294e+06	5.73469e+06	6.62103e+06	9.74327e+06	5.82419e+06	7.43911e+06	6.77485e+06	5.52924e+06	5.63323e+06	5.07306e+06	9.38661e+06	7.10436e+06	6.74002e+06	5.03482e+06
anthranilate	58920.7	36725.4	48984.5	66888.9	35164.5	38098.9	32065.9	48750.7	64337	25301.4	29575.2	19849.5	51638.3	35407	34747.1	236590	21775.9	28658.2	39869.3	34071.3	22322.2	27221.7	38771.7	32389.6	51032.4	12066.4	64915.3	52253.8	26439	69249.9	9938.48	84004	147285	57634.3	69233.2	62266	27235.3	32335.6	71634	53211.7	68728.9	73816.9	60885.7	70735.2	54791.4	31201.1	18434.3	49941.4
arginine	7.68163e+07	7.90017e+07	7.39325e+07	6.65394e+07	6.09036e+07	5.90248e+07	5.9628e+07	5.60297e+07	7.72856e+07	7.27164e+07	7.30024e+07	6.80118e+07	5.74745e+07	8.7975e+07	7.24779e+07	6.48592e+07	3.76615e+07	5.39551e+07	5.32862e+07	5.00134e+07	5.68294e+07	3.92652e+07	4.31907e+07	6.45702e+07	3.29466e+07	4.41647e+07	3.99266e+07	4.02402e+07	3.05765e+07	3.42813e+07	3.30464e+07	2.70271e+07	5.12798e+07	5.02221e+07	5.38362e+07	3.60414e+07	3.95329e+07	4.66757e+07	3.06103e+07	4.38153e+07	4.82611e+07	5.72337e+07	5.25992e+07	4.84979e+07	4.64562e+07	4.8744e+07	5.01339e+07	4.00422e+07
arginosuccinic acid	973238	802571	877583	834544	698273	828360	778670	773826	581177	570559	476565	628220	354265	410087	382218	410319	470493	463816	459157	455884	217767	196246	250279	225776	296009	429653	355509	337215	324782	273926	250372	298985	583442	618420	571502	431404	466734	457654	496467	557555	253333	226047	249004	207729	289306	306506	293756	303921
Ascorbic acid	244523	392555	389818	289531	55352.9	90115.8	81397.2	99207.7	758958	598024	709779	940713	85469.9	63211.6	71928.2	65221.2	87684.1	91145	79761.8	111607	48636.3	56996.6	101545	57468.6	346345	347255	595459	359094	120945	133681	119302	143366	230804	271540	384472	372259	153708	85000.6	133494	152148	397368	301938	330335	217783	206175	310329	217812	246470
asparagine	1.33277e+07	1.39187e+07	1.33671e+07	1.39769e+07	8.16749e+06	8.57839e+06	1.04478e+07	9.3378e+06	1.50503e+07	1.43918e+07	1.49244e+07	1.55791e+07	1.18834e+07	1.24316e+07	1.33108e+07	1.3252e+07	9.81546e+06	1.09572e+07	1.03756e+07	1.08799e+07	6.77243e+06	6.74164e+06	6.43358e+06	6.59154e+06	3.30046e+07	3.41425e+07	3.32393e+07	3.55568e+07	3.164e+07	3.14495e+07	2.96733e+07	3.15032e+07	2.61177e+07	2.53622e+07	2.57222e+07	2.57024e+07	3.08383e+07	2.96846e+07	3.08216e+07	3.05553e+07	4.26796e+06	4.15519e+06	4.43733e+06	4.15883e+06	3.77125e+06	3.39279e+06	4.65895e+06	3.85093e+06
aspartate	1.05245e+07	1.13635e+07	1.03784e+07	9.27288e+06	5.53385e+07	4.77231e+07	5.28603e+07	4.93215e+07	1.91775e+07	1.83731e+07	1.84865e+07	1.69974e+07	5.4363e+07	5.3e+07	5.17471e+07	5.2253e+07	7.97139e+06	7.59055e+06	7.65357e+06	7.02284e+06	4.00369e+07	3.86624e+07	3.78778e+07	3.85933e+07	8.86395e+06	1.41222e+07	9.93344e+06	1.19103e+07	2.49244e+07	2.60755e+07	2.52119e+07	2.57016e+07	1.48529e+07	1.17596e+07	1.60213e+07	1.20763e+07	2.08711e+07	2.36505e+07	2.42938e+07	2.32724e+07	8.11024e+06	8.72478e+06	8.26514e+06	7.62232e+06	1.44072e+07	1.71525e+07	1.58291e+07	1.50875e+07
ATP-nega	3.68518e+07	3.84328e+07	3.79018e+07	4.04766e+07	3.95708e+07	4.03842e+07	4.01554e+07	4.17727e+07	3.05847e+07	3.2094e+07	2.87254e+07	2.12482e+07	4.13939e+07	4.04243e+07	3.87107e+07	4.19757e+07	6.6242e+06	7.74816e+06	7.03821e+06	1.13073e+07	3.09064e+07	2.93684e+07	3.03389e+07	2.99327e+07	1.93667e+07	2.1078e+07	1.92366e+07	2.37374e+07	1.3729e+07	1.37588e+07	1.43977e+07	1.44011e+07	1.59987e+07	1.7466e+07	2.5469e+07	2.14658e+07	3.68856e+07	3.45396e+07	3.75403e+07	3.45668e+07	3.78737e+07	3.76365e+07	3.78069e+07	3.84913e+07	3.69459e+07	3.88432e+07	4.03053e+07	3.99629e+07
Atrolactic acid	174719	131706	167522	149011	136410	146261	120556	144241	137915	110412	127156	132055	139438	107915	118791	97833.5	141442	147390	177354	171257	134585	133903	139970	136544	151423	154297	173017	142919	144821	141645	148396	162332	153973	179924	166298	163582	130914	141395	117762	136918	132562	133517	121313	113860	117847	120993	137901	124022
betaine	4.35792e+07	4.18185e+07	4.0307e+07	3.86396e+07	3.95318e+07	3.81655e+07	3.84452e+07	4.10543e+07	3.39302e+07	3.6291e+07	3.5186e+07	3.69317e+07	3.98685e+07	3.70678e+07	3.86969e+07	3.80284e+07	3.919e+07	4.45759e+07	3.88383e+07	4.62271e+07	5.09113e+07	4.80098e+07	4.74892e+07	5.27683e+07	4.11683e+07	4.32882e+07	4.07663e+07	4.24527e+07	4.60513e+07	3.8385e+07	4.22254e+07	4.35534e+07	4.18561e+07	4.16768e+07	3.90073e+07	3.69602e+07	4.06348e+07	4.02102e+07	3.97936e+07	3.88421e+07	4.06541e+07	4.09345e+07	4.17026e+07	4.23619e+07	4.19129e+07	4.26023e+07	4.07199e+07	3.92261e+07
betaine aldehyde	327898	207960	301216	208409	298197	159754	330838	143204	335442	290796	317495	332276	192268	221098	407935	216274	296433	280188	221714	267294	554602	530240	587727	540554	302901	202504	142779	173514	210024	292748	272106	169663	247553	159713	240798	344661	252342	420694	431766	436658	243819	266056	205618	225389	244560	237896	197517	265121
biotin	162431	200066	177566	199205	223810	220194	170913	204191	234243	186003	227981	255563	242822	177227	226441	164537	249797	230426	257799	289386	207650	211571	191261	221724	272683	340470	284385	296866	240999	288457	268773	269365	343698	374580	298450	309743	305273	278522	313623	329927	358648	338523	418432	408407	299435	344164	390895	333889
butyryl-CoA	N/A	N/A	3218.61	N/A	N/A	N/A	N/A	N/A	N/A	N/A	N/A	N/A	2686.95	N/A	N/A	N/A	N/A	N/A	N/A	N/A	N/A	N/A	3226.53	N/A	N/A	N/A	N/A	N/A	N/A	N/A	N/A	N/A	N/A	N/A	N/A	N/A	N/A	N/A	N/A	N/A	3224.85	4839.76	N/A	3763.56	N/A	N/A	N/A	N/A
Carbamoyl phosphate	22353.7	17347.9	6596.14	8490.15	7605.31	8364.2	8900.78	1.14872e+07	14160.9	7738.58	8315.12	5.46638e+06	11829.2	9.57313e+06	8.48556e+06	7547.29	18870.6	1.31948e+06	1.39324e+06	13749.5	24175.9	18901.5	33803	16946.1	14633.2	12570.4	14860.7	15205	10844.6	26664.2	9893.46	13342.9	14072.9	13640.4	2.50806e+06	21828.4	16174.8	21485	9649.8	12022.9	5.79341e+06	13568.9	5.8865e+06	5.95622e+06	19172	8237.47	5.02219e+06	4832.18
carnitine	5.00779e+07	5.60484e+07	5.27974e+07	5.51418e+07	5.4125e+07	5.61184e+07	4.82191e+07	5.54846e+07	3.89255e+07	3.76065e+07	3.725e+07	3.70945e+07	5.28348e+07	5.42065e+07	5.28048e+07	5.00146e+07	5.91811e+07	5.77216e+07	5.84252e+07	5.52451e+07	5.35965e+07	6.04797e+07	5.92296e+07	5.38392e+07	4.18541e+07	4.96624e+07	4.04585e+07	4.42329e+07	4.68678e+07	4.5249e+07	4.64171e+07	4.80169e+07	5.02198e+07	5.14401e+07	5.14366e+07	5.42111e+07	5.64207e+07	5.2822e+07	5.7825e+07	5.09636e+07	2.81394e+07	2.80405e+07	2.57224e+07	2.63146e+07	3.16567e+07	2.99812e+07	3.10315e+07	3.08154e+07
CDP-choline	38176.7	33340.6	35491.4	46784.3	65601.2	84424.6	75822.1	73666.4	89265	69906.4	101630	101097	51087.5	62913.2	57000.4	46217	11829.9	11830	16669.4	11292.7	30114.3	22048.1	39794.1	22584.2	18821.4	18819.4	14526.6	12366.4	19359.2	24737.8	19358.9	18284.6	16671.3	13983.6	12367	15601.4	18835.8	13469.6	11827.9	6452.98	10754	8605.06	11838.6	4838.11	9140.19	11294.3	7530.34	9677.56
CDP-ethanolamine	37104.8	41944.1	27421.9	30114.1	86581.6	77972.7	78503.9	78496.7	25811.6	29574.9	21519.8	26350.8	40047	45167.9	68828.5	56460.3	5376.94	8065.71	6451.24	13998.4	10755.2	13393	14968.1	23133.1	8076.59	8064.32	9140.8	5924.78	N/A	3763.95	5906.66	5373.72	20957.5	15591.9	20970.8	17206.8	20972.3	25799.3	19895.5	16660.3	11814.3	N/A	3758.64	N/A	3180.11	N/A	4924.73	N/A
CDP-nega	116651	139019	130309	149516	158773	140039	144438	165416	100235	111542	116993	96187.8	142114	147005	108971	147044	55090.6	76486.6	68057.5	57959.4	194704	190199	187626	182358	68820.9	56052.1	42614.8	56322.4	50861.6	22201.5	28490.9	30055	68529.7	66099.5	74616.9	70709.3	162135	173354	162876	194806	149847	141122	131644	131502	190619	174843	168566	181683
Cellobiose	27229.1	9029.14	2719.91	5409.47	22527.1	6046.57	15818.5	26936.4	12969.1	6156.62	8147.92	16908.2	20855.3	8256.12	4846.25	17665.6	13467.3	35457.9	9811.81	11400.2	9482.46	40301	12452.8	4291.12	6786.57	N/A	4496.11	80255	4079.45	15505.2	26819.1	6766.44	5830.05	4260.64	9538.54	8912.89	77568.6	15373.4	17007.3	3924.26	6041.04	4096.13	13870.8	3445.68	7977.16	31285.3	27918.4	3826.99
cholesterol	3.38893e+06	1.48671e+06	1.4729e+06	2.37899e+06	1.41098e+06	1.94396e+06	2.54796e+06	2.79983e+06	2.41052e+06	2.04373e+06	2.64969e+06	1.7746e+06	7.44764e+06	7.82437e+06	5.10687e+06	2.20753e+06	1.25049e+06	2.0157e+06	1.45361e+06	3.92127e+06	2.31273e+06	2.85702e+06	3.08172e+06	5.06228e+06	2.79441e+06	2.43204e+06	2.81888e+06	2.50431e+06	2.34028e+06	4.01464e+06	1.67865e+06	6.02055e+06	2.67502e+06	4.04389e+06	2.2398e+06	2.19165e+06	5.97435e+06	7.59458e+06	4.02302e+06	4.26253e+06	2.69836e+06	2.30821e+06	1.833e+06	2.66922e+06	3.10186e+06	2.58896e+06	1.92668e+06	3.31285e+06
cholesteryl sulfate	1.34748e+06	492281	571976	908550	585211	615867	558330	769676	754991	609470	976538	223176	3.52244e+06	3.26475e+06	2.5622e+06	891597	385014	809207	344198	2.34572e+06	1.09891e+06	1.26223e+06	948290	1.59535e+06	1.9926e+06	1.03297e+06	2.50613e+06	1.12848e+06	982198	1.89876e+06	575372	3.2941e+06	2.50578e+06	5.36461e+06	3.85154e+06	2.58128e+06	1.04428e+07	1.75498e+07	7.73234e+06	8.5992e+06	2.93047e+07	2.19093e+07	2.29492e+07	2.37821e+07	2.87087e+07	2.19657e+07	1.76448e+07	2.5694e+07
Cholic acid	N/A	N/A	N/A	N/A	N/A	N/A	4839.83	N/A	N/A	N/A	N/A	3784.13	N/A	N/A	3756.53	N/A	N/A	N/A	N/A	N/A	N/A	N/A	N/A	N/A	N/A	N/A	N/A	N/A	N/A	4285.69	N/A	N/A	N/A	N/A	2689.33	N/A	N/A	3174.06	N/A	3763.64	3226.33	N/A	N/A	3302.84	N/A	N/A	4299.15	N/A
choline	3.0954e+06	2.68979e+06	2.65506e+06	2.63728e+06	3.58421e+06	3.66291e+06	3.27084e+06	2.93833e+06	1.23845e+06	1.29526e+06	1.48957e+06	1.34216e+06	1.07128e+06	952951	1.06876e+06	1.03663e+06	365996	230965	431649	220966	799662	471007	290716	452905	251770	309977	227739	383006	313957	330757	214069	276901	142689	213777	85977.2	206369	72676	82614.2	232715	107339	1.58529e+06	1.31322e+06	1.71771e+06	1.53131e+06	1.42044e+06	1.36548e+06	1.49517e+06	1.34162e+06
Citraconic acid	2.28261e+06	3.1053e+06	3.41891e+06	2.64311e+06	519148	1.61697e+06	1.89787e+06	1.47619e+06	2.1903e+06	2.53427e+06	2.51671e+06	2.83805e+06	1.7185e+06	2.80825e+06	2.33678e+06	2.30638e+06	5.30583e+06	5.62704e+06	5.58577e+06	5.84384e+06	2.37165e+06	1.68043e+06	1.73545e+06	1.69619e+06	2.82672e+06	2.52545e+06	2.03953e+06	3.50638e+06	2.2868e+06	2.8404e+06	2.19469e+06	2.53817e+06	4.988e+06	4.77361e+06	4.48896e+06	5.56734e+06	3.60079e+06	4.11127e+06	3.35987e+06	4.27476e+06	2.73322e+06	3.34625e+06	3.01745e+06	3.19169e+06	2.95435e+06	2.55424e+06	2.41964e+06	3.37525e+06
citrate	2.63398e+07	2.96951e+07	2.61412e+07	4.72668e+07	2.41108e+07	2.40374e+07	1.55754e+07	1.44958e+07	3.87607e+07	3.728e+07	3.96671e+07	4.61484e+07	2.52846e+07	2.9172e+07	2.90631e+07	3.26251e+07	5.71426e+07	5.88927e+07	7.27526e+07	5.58348e+07	1.46363e+07	2.44389e+07	3.45849e+07	2.07855e+07	2.52491e+07	2.64209e+07	2.45097e+07	3.70905e+07	2.17526e+07	2.69283e+07	2.78992e+07	2.26493e+07	3.03166e+07	5.34422e+07	4.86183e+07	3.06965e+07	2.9348e+07	2.65338e+07	1.84825e+07	2.86432e+07	4.34632e+07	3.52954e+07	3.03767e+07	2.82315e+07	3.1538e+07	3.07945e+07	2.93036e+07	4.50197e+07
citrate-isocitrate	4.84186e+07	3.70474e+07	8.08898e+07	7.84562e+07	3.54574e+07	3.45565e+07	3.36443e+07	3.18843e+07	8.16604e+07	8.10518e+07	8.48794e+07	6.93556e+07	6.7681e+07	4.08075e+07	2.99963e+07	6.94059e+07	9.76825e+07	9.65797e+07	8.66892e+07	9.54586e+07	5.0867e+07	3.91482e+07	4.7722e+07	4.23696e+07	4.2756e+07	4.29897e+07	6.21728e+07	7.22186e+07	6.63514e+07	7.09502e+07	3.45537e+07	5.55603e+07	3.22523e+07	4.02406e+07	5.64225e+07	5.41712e+07	7.03005e+07	5.93427e+07	8.26541e+07	4.90047e+07	9.31805e+07	6.48964e+07	4.88028e+07	3.79095e+07	7.76522e+07	5.11793e+07	4.33455e+07	5.37476e+07
citrulline	3.74945e+06	3.83621e+06	3.80887e+06	3.64532e+06	2.00025e+06	2.10917e+06	2.22057e+06	2.39408e+06	5.23976e+06	4.48171e+06	4.63816e+06	4.39677e+06	4.80077e+06	5.14499e+06	5.1862e+06	4.72777e+06	1.27185e+07	1.30738e+07	1.33984e+07	1.3581e+07	9.33271e+06	9.78849e+06	9.28401e+06	1.00298e+07	3.64432e+06	3.72147e+06	3.98619e+06	3.68587e+06	2.61895e+06	2.96962e+06	2.48861e+06	2.56038e+06	1.52984e+06	1.55585e+06	1.75143e+06	1.67276e+06	1.15184e+06	1.31119e+06	1.13418e+06	1.15288e+06	3.62609e+06	4.13595e+06	3.91435e+06	3.55841e+06	3.21845e+06	3.61855e+06	2.95058e+06	3.54154e+06
CMP	1.38954e+06	1.55693e+06	1.12196e+06	1.25112e+06	1.9044e+06	1.8855e+06	1.92197e+06	1.90657e+06	1.31318e+06	1.12243e+06	1.03046e+06	1.16601e+06	1.93473e+06	2.38679e+06	2.20526e+06	1.99691e+06	847418	671961	562766	709230	1.21526e+06	1.01426e+06	960234	891130	561411	675588	554161	597304	665167	521573	617786	647846	1.93657e+06	1.59772e+06	1.85433e+06	1.37878e+06	2.30216e+06	2.61371e+06	2.8016e+06	2.22155e+06	1.65556e+06	1.24159e+06	1.24833e+06	1.38452e+06	1.6352e+06	1.41309e+06	1.6023e+06	1.43009e+06
coenzyme A-nega	45211.3	30113.7	37581.3	29922.9	54492.7	65196.4	32746.3	57604.6	14981.6	29545.5	16780.6	22039.1	56426.2	71520.6	59370.4	43561.8	40623.7	55412.4	26883.8	22810.3	57575.2	63969.3	75888.9	69218.3	16115.4	37981.5	23619.1	23199.9	10216.6	16133.2	15591.7	9134.7	13992.2	16636.1	15057.6	19903.4	42481.8	29035.2	42508.7	47867.3	84369.5	63374.9	64570.2	47247.1	69779.3	93672.5	76856.9	77502.9
coenzyme A-posi	415969	401754	478726	613436	710750	857195	519155	807854	288937	337385	466905	245588	548710	486809	481352	421337	321862	385707	290978	373204	934101	831882	863315	872676	234812	371783	365480	403962	181776	204571	183504	154156	173805	92730.9	252412	208855	464553	257593	563951	573704	778337	689822	701706	522468	765175	1.182e+06	1.08001e+06	1.06402e+06
creatine	6.70436e+07	6.37003e+07	6.43311e+07	6.23492e+07	6.4589e+07	6.70683e+07	6.50691e+07	6.64956e+07	6.76233e+07	6.23551e+07	6.77596e+07	6.5254e+07	7.06423e+07	7.18665e+07	6.85707e+07	6.92825e+07	5.15444e+07	5.20257e+07	5.29439e+07	5.21656e+07	4.89948e+07	4.64006e+07	5.021e+07	4.86658e+07	6.30983e+07	6.33842e+07	6.32531e+07	6.41286e+07	6.89457e+07	5.97173e+07	6.57261e+07	6.92966e+07	5.53052e+07	5.17907e+07	5.52812e+07	5.56283e+07	6.09003e+07	5.40164e+07	5.55909e+07	5.51796e+07	6.73566e+07	6.80608e+07	6.98687e+07	6.945e+07	6.76687e+07	6.48878e+07	6.78234e+07	6.95194e+07
Creatinine	2.14054e+07	2.31046e+07	2.0626e+07	1.96113e+07	1.94419e+07	2.04263e+07	2.04628e+07	2.00511e+07	2.41561e+07	2.34937e+07	2.34878e+07	2.24758e+07	2.69624e+07	2.52466e+07	2.71315e+07	2.53907e+07	2.21599e+07	2.28165e+07	2.3285e+07	2.14334e+07	2.26904e+07	2.35619e+07	2.32233e+07	2.47047e+07	1.8317e+07	1.84417e+07	1.9237e+07	1.7938e+07	1.64213e+07	1.57116e+07	1.52468e+07	1.7812e+07	1.8645e+07	1.95079e+07	2.06992e+07	1.96467e+07	1.86551e+07	1.90757e+07	1.75724e+07	1.70302e+07	2.0376e+07	2.05586e+07	1.96661e+07	1.922e+07	1.84046e+07	2.0087e+07	1.8764e+07	1.99798e+07
CTP-nega	1.0409e+06	1.24775e+06	1.18759e+06	1.32202e+06	1.04662e+06	1.17119e+06	1.10534e+06	1.31765e+06	805908	699046	631464	542192	1.05538e+06	1.00825e+06	1.11159e+06	1.07588e+06	392596	380375	384001	548252	1.20697e+06	1.14794e+06	1.28576e+06	1.31937e+06	269655	349458	267367	400728	194515	211258	166416	172191	376603	366116	586731	497281	1.65799e+06	1.38921e+06	1.70104e+06	1.36238e+06	1.54663e+06	1.28088e+06	1.23951e+06	1.28219e+06	1.6914e+06	1.87629e+06	1.583e+06	1.64585e+06
cyclic bis(3->5) dimeric GMP	N/A	N/A	N/A	N/A	N/A	N/A	N/A	N/A	N/A	N/A	N/A	N/A	N/A	N/A	N/A	N/A	N/A	N/A	N/A	N/A	N/A	N/A	N/A	N/A	N/A	N/A	N/A	N/A	N/A	N/A	N/A	N/A	N/A	N/A	N/A	N/A	N/A	N/A	N/A	N/A	N/A	N/A	N/A	N/A	N/A	N/A	N/A	N/A
cyclic-AMP	203718	231255	220056	211305	194707	176907	212516	157585	162637	218568	177454	170585	305494	305875	267325	295115	204961	181274	208496	207686	218314	207663	212945	217658	144104	154315	153693	140385	109198	124387	124219	109698	140335	115071	142507	148512	130690	136721	127828	135686	111664	117791	109595	136019	105382	95707.2	105702	90246.8
cystathionine	2.05691e+06	2.14539e+06	2.00228e+06	2.09729e+06	594934	578779	626116	643381	2.3571e+07	2.34318e+07	2.4868e+07	2.40661e+07	1.11427e+07	1.1301e+07	1.31676e+07	1.19753e+07	1.26716e+07	1.26347e+07	1.30706e+07	1.23774e+07	1.17475e+06	1.15196e+06	1.21105e+06	1.12351e+06	5.40414e+06	5.60364e+06	5.41151e+06	6.11863e+06	3.18425e+06	3.36684e+06	3.61411e+06	3.90874e+06	2.70016e+06	2.9708e+06	3.22966e+06	2.99482e+06	2.83776e+06	2.86141e+06	2.67312e+06	2.13838e+06	662105	706230	695913	690704	819249	793057	759345	735600
cysteine	397412	353653	305655	326225	540613	744282	411679	544998	880927	591786	657696	531616	2.26457e+06	2.74665e+06	2.42683e+06	2.38392e+06	1.17847e+06	674665	927308	1.07054e+06	1.41093e+06	1.34988e+06	2.43011e+06	1.37971e+06	414316	303498	245133	246928	259413	315715	330373	346185	538236	340634	435133	514008	481809	378938	505770	434572	382754	364389	469753	358058	280441	418750	374893	450629
Cystine	N/A	6127.26	N/A	N/A	N/A	3222.03	N/A	N/A	N/A	N/A	2685.49	3465.22	N/A	4288.11	N/A	N/A	3227.6	N/A	3254.89	N/A	12641.2	16591.5	7972.03	9661.84	16127.5	19338.6	27464.5	29125.7	21428.4	7444.6	11824.7	12110.2	13748.3	9263.04	6502.3	11184	11022.9	9190.07	13953.7	9801.65	N/A	N/A	2696.33	N/A	N/A	3222.51	N/A	N/A
cytidine	35194.1	29543.6	42436.3	28002.9	26678.3	14953.3	49881	12466.9	287280	229342	301583	290720	183016	220634	261246	256895	470731	468552	449109	542370	757277	725500	638202	737052	6090.56	61746.1	39174.4	55922.7	38116.2	54859	48383.3	50446.7	274828	226387	281347	229234	220464	169042	215079	195501	132295	176053	187919	117604	187710	201469	217076	203127
cytosine	1.20298e+06	1.11119e+06	1.04262e+06	1.07375e+06	819752	854733	937511	843312	964217	939612	856383	925970	965237	1.03896e+06	978822	925613	1.25295e+06	1.24511e+06	1.22193e+06	1.12884e+06	1.18384e+06	1.08944e+06	1.11777e+06	1.16402e+06	1.12605e+06	1.16022e+06	1.05604e+06	1.07398e+06	943415	990812	1.00679e+06	1.07023e+06	1.11347e+06	1.10319e+06	1.19405e+06	1.17308e+06	952984	1.07828e+06	909739	908877	683625	783232	701009	720476	675318	677385	655386	741017
dAMP	160713	175771	160854	201065	237790	136521	187130	195127	280698	445205	284820	345225	659198	568811	483294	605075	179674	167606	136127	146119	202353	176923	216760	220563	176012	254455	183189	213597	149803	206971	220044	185517	211910	205428	268197	202716	294208	331123	266743	239863	183887	205339	193137	297049	287878	223160	259067	196882
dATP-nega	66155.6	93319	93569.7	94746	131987	129054	129621	165034	42196.1	27051.6	39497.6	18785.7	115714	94706.6	76343.5	109177	6338.73	8636.78	8539.53	13902.5	50568	67759.7	54125.1	72211.3	58862	46919.4	41943	63451.4	25940.5	26733.9	23127.5	35569.7	34952.5	32716.9	42347.1	38680.8	52167.6	74357	67520.7	58534.5	91243.6	109335	82993	77473.1	100048	69275	95885.6	80483.5
dCDP-nega	29374.4	22571.7	25394.5	39164.3	27950	46237.8	33035.3	49556.4	22173	13138.8	18657	14643.8	34906	31226.1	33322.2	31644.8	8089.12	4204.24	7083.37	15790.3	39318.2	28662.5	28493.1	24713.1	14473.3	12271.6	6956.33	19022.4	6420.23	5012.14	7482.56	3759.34	9595.13	11462.5	10295.2	10439.6	32198.7	41343.6	29583.9	24755.3	35465.9	28619.9	42466.7	21766.6	34632.6	44007.3	38732.5	40294.9
dCMP	46250.1	22617.3	27439.1	38168.7	63170.5	58611	77433	82230.5	64155.3	56581	53819.8	49299.3	94648.6	82547.5	95331	71330.7	10360.1	6985.76	9167.85	10750.4	53194.5	44392.5	42038.7	40870.1	35672.7	16089.8	41399	28481.9	55203.4	36608.7	31226.5	26342.5	55445.6	36036	69370.9	47897.6	50979.4	59030.5	51402.4	43562.4	29679.9	22489.6	31727.4	38731.1	42482.2	52702.6	38292.4	47609.5
dCTP-nega	106483	107049	106988	126908	130770	125227	113102	142281	66184.2	76916.2	67707.9	66146.1	122224	110135	106957	120994	26347.5	23121.7	18260.1	27317.8	137118	111849	136553	115265	35184.6	55688	47832.2	44497.8	31871.9	22687.7	18105	16162.7	60426	47082.9	66244.3	65058.9	143104	99042.5	138847	141726	183334	170442	146585	134390	172608	159672	139213	140451
dehydroascorbic acid	4405.46	5536.39	8629.3	N/A	3985.84	8603.29	5913.45	6437.68	N/A	6880.31	12892.1	9264.31	N/A	7527.34	6947.05	N/A	5252.99	13443.1	3302.84	N/A	9140.32	8613.82	6796.09	11829.3	N/A	N/A	4863.89	3257.05	4720.49	N/A	N/A	8064.49	N/A	5251.36	N/A	N/A	5910.4	7488.32	4472.89	N/A	N/A	6988.5	9677.75	N/A	3224.36	6470.65	4224.76	N/A
deoxyadenosine	82238.6	63927.9	56482.4	41925.3	10031.6	45774.6	34807.7	28061.7	1.18058e+06	1.35667e+06	9143.69	1.16234e+06	798913	622940	828259	1.26921e+06	7046.03	6615.59	3219.26	7553.06	4303.72	9117.04	11106.2	6905.7	6433.88	21017.3	8040.91	10111.9	21817.9	24535	10722	25186.2	24914.3	19824.9	35220.3	27872.5	14254.8	9317.07	10808.4	23203.1	79643.2	103672	165112	167886	75230.1	34450.1	25348.2	27579.5
Deoxycholic acid	N/A	N/A	N/A	N/A	N/A	N/A	N/A	N/A	N/A	N/A	N/A	N/A	N/A	N/A	N/A	N/A	N/A	N/A	N/A	N/A	N/A	N/A	N/A	N/A	N/A	N/A	N/A	N/A	N/A	N/A	N/A	N/A	N/A	N/A	N/A	N/A	N/A	N/A	N/A	N/A	N/A	N/A	N/A	N/A	N/A	N/A	N/A	N/A
deoxyguanosine	17755.9	14014.2	6455.72	8486.51	20001.4	12481.2	21507.2	17209.6	31199.2	19894.5	16750.2	18651.2	19023.8	37094.2	29063.9	26362	10152.2	18222.7	12736.8	14916.7	29648.2	23123.9	19429.3	27715.2	13317.5	22049.3	19355.9	20994.6	24705.5	29605.9	30642.3	36570.1	16789.1	10260.1	22592.5	14478.7	24666	16149	19458.2	12891.6	11827.7	8008.17	10782.9	12296.5	8079.12	11328	15054.3	13853.9
deoxyinosine	27973.7	28409.9	29496.7	31723.6	81124.7	95720.7	90029	70471.1	8592.4	N/A	6446.08	4314.46	8056.97	9680.37	11767.4	10851.8	21636.1	16097.5	21461.9	18810.1	30406.5	31696.9	31791.7	38170.1	44546.5	67727.8	31318.9	39233	106486	106387	159131	145224	13459	10137.9	14509.9	18500.8	16693	15590.2	15620.1	22527.4	38169.4	52426.2	35469.4	42783.5	61919.7	67586.3	70923.7	71561.5
deoxyribose-phosphate	334974	380732	265258	287485	389863	418690	463032	524927	116506	91707.2	91062.2	92585	154876	161763	139474	160419	216207	209213	229327	181881	155120	143348	287729	21275.6	245148	245236	182151	201853	208199	226194	209254	252769	417707	229983	365239	265215	278860	271730	293420	249747	341827	356457	386058	391424	328425	299694	324129	342792
deoxyuridine	26400.5	37102.6	43952.7	24194.3	82664.2	77910.2	110126	66647.8	8011.08	6455.78	5913.96	N/A	10755.5	18282.4	14494.1	10209.8	8602.2	15066.1	16669.6	8577.42	46245.4	27305.6	37103	39792.7	N/A	3760.22	N/A	3218.99	N/A	N/A	N/A	N/A	N/A	N/A	N/A	N/A	N/A	N/A	N/A	N/A	39740.1	25251.4	36825.3	31256	36045.6	40734.2	29037.5	49892.6
dephospho-CoA-nega	N/A	4831.63	5371.78	3231.24	5852.23	5886.1	4838.06	5912.78	N/A	N/A	N/A	N/A	3772.25	N/A	3652.9	N/A	N/A	N/A	2661.61	N/A	4180.85	4296.97	N/A	6442.46	N/A	N/A	N/A	3224.55	N/A	N/A	N/A	N/A	3762.09	N/A	5914.98	5919.99	N/A	7537.26	N/A	N/A	N/A	N/A	4301.81	5907.86	N/A	N/A	3782.8	3270.05
dephospho-CoA-posi	N/A	6473.02	5920.36	8105.37	9194.07	4784.35	5351.37	2688.23	N/A	4309.45	N/A	N/A	5105.33	N/A	N/A	N/A	N/A	N/A	N/A	N/A	N/A	N/A	3792.87	N/A	N/A	N/A	10868.7	N/A	6452.95	3764.96	N/A	N/A	6991.52	7536.57	N/A	7133.57	N/A	9677.63	N/A	2696.28	N/A	N/A	N/A	N/A	N/A	N/A	N/A	N/A
D-erythrose-4-phosphate	68603.5	61292.2	88596.6	46326.8	108115	82916.7	125172	101617	46590.5	49000.7	31417.7	34479	36496.5	49044.7	26594.9	48592.5	45597.8	37511.1	39147.7	39097.1	35447.5	23092.8	25410	23443.5	49739	85149.1	55691.2	64047.1	55991.7	77238.1	55803.4	48154.3	62355.1	54645	57635.7	40198.8	50347.8	43206	48773.1	52706	54085.1	56353.2	64842.9	64637.8	73093	60327.2	73297.3	75817.2
dGDP-nega	5.01981e+06	6.8939e+06	7.84934e+06	7.35514e+06	8.06307e+06	7.88663e+06	8.06767e+06	8.4009e+06	5.87017e+06	6.07585e+06	5.18125e+06	4.56837e+06	1.01159e+07	8.05695e+06	8.16757e+06	7.67891e+06	1.17475e+06	1.72514e+06	1.53394e+06	1.82236e+06	8.85041e+06	8.52698e+06	8.49435e+06	8.14959e+06	2.85379e+06	3.05592e+06	2.42528e+06	3.75484e+06	2.36189e+06	2.33238e+06	2.37929e+06	2.38331e+06	3.36267e+06	4.3896e+06	5.03136e+06	4.73419e+06	7.80653e+06	9.31593e+06	8.3212e+06	7.7186e+06	8.68281e+06	7.61236e+06	7.90133e+06	8.24173e+06	9.12395e+06	9.4014e+06	9.26533e+06	8.04398e+06
D-glucarate	90431.6	82739.7	89761.8	97172.5	152395	118395	103629	144624	172700	151702	185962	153795	308087	248802	231323	274528	37225	34093.8	44629.7	33035	79443.5	80225.5	70672.8	83986.7	23879.6	29024.1	24759.6	23094.1	19946.8	23185.9	26391.8	39991.4	82369.5	69456.5	70776.1	70952.7	116677	96414	105718	98655.6	182537	201694	164684	202294	139625	158735	175488	178580
D-gluconate	244346	235866	239189	219241	283042	313923	353743	329027	243612	200096	218371	271888	387583	400514	400192	441426	190916	169408	169857	166308	447364	374491	439664	379651	166293	179413	187976	147571	136082	168236	129083	204434	178238	186703	179576	207528	163015	117615	147271	159593	515917	583241	552639	568950	439689	433215	474247	491952
D-glucono-?-lactone-6-phosphate	9471.78	N/A	N/A	4548.95	7451.08	9535.35	8417.4	11518.2	9746.01	9359.3	N/A	4291.28	7009.98	4144.97	5654.35	3975.86	2597.63	N/A	N/A	5227.02	3741.67	12610.6	8409.15	5713.47	N/A	N/A	17644.4	8470.3	N/A	N/A	3382.95	N/A	22221.1	14314.5	N/A	N/A	6901.92	8013.59	8969.71	13121.7	10678.7	7827.85	5028.11	7157.99	5850.94	9424.98	10254	4268.82
D-glucosamine-1-phosphate	8603.84	8051.75	N/A	8080.49	5968.24	7981.83	3295.25	N/A	10801.9	4841.37	5380.12	14465.3	7307.34	13428.6	6615.75	10158.6	N/A	5291.57	6412.4	3109.52	16662	6005.2	N/A	15591.8	10706.5	6541.07	5409.1	9413.76	3843.8	4817.96	13492.9	8764.2	10630.5	10277.2	7292.84	4238.97	13418.2	6016.63	7103.33	15842.9	11248.9	11315.4	12366.7	8373.96	3767.41	11812	4019.61	8771.75
D-glucosamine-6-phosphate	5357.61	8068	3349.06	3731.24	8063.54	3763.17	8067.9	8067.71	3751.28	5904.49	N/A	7495.1	4794.93	7795.49	N/A	7539.34	12869.9	8926.98	N/A	N/A	N/A	7477.68	8071.7	5900.57	9707.13	18819.7	17739.1	6985.09	23120.9	10216.5	25804.7	19618.3	10753.5	14037.7	4833.94	6442.91	11292.4	9683.43	8605.86	8604.96	6971.42	4839.64	8440.55	6451.73	6454.96	N/A	10213.2	N/A
D-glyceraldehdye-3-phosphate	218450	220712	164889	123533	411987	511680	391287	572756	292584	342326	305222	279784	394248	570414	480478	571475	107653	59033.5	133220	66910.1	215689	182691	275493	174663	56886.8	91548.7	44565.6	87480.6	74979.3	128295	72644	142830	85500.4	57639.5	70093.4	50163	85213.4	71632.9	85900.1	74159.9	43727.8	87080.5	75206.6	99364.5	129792	53676.1	81354.6	91774.5
dGMP	7393.87	3699.77	12388.1	N/A	N/A	4034.45	3763.53	5908.81	N/A	4282.52	3724.8	7391.52	7528.55	N/A	10801.1	4321.67	4287.77	5354.86	3699.95	8143.51	3779.36	6289.39	9663.06	4271.27	3226.42	N/A	2768.97	N/A	N/A	N/A	N/A	5419.09	12373.3	6380	6200.08	5223.17	9677.76	N/A	6941.07	7485.68	4276.17	4853.04	4839.69	9760.96	N/A	10278.9	6449.55	3773.94
dGTP	3.65618e+07	3.84656e+07	3.77787e+07	3.98158e+07	4.01457e+07	4.02195e+07	4.11035e+07	4.18252e+07	3.03366e+07	3.14024e+07	2.85827e+07	2.14857e+07	4.20707e+07	4.0812e+07	3.97044e+07	4.12603e+07	6.64762e+06	7.79367e+06	7.01292e+06	1.16722e+07	3.06718e+07	2.91065e+07	3.09272e+07	2.84926e+07	1.878e+07	2.17191e+07	1.91068e+07	2.41931e+07	1.31245e+07	1.38984e+07	1.43444e+07	1.45099e+07	1.6233e+07	1.7246e+07	2.45656e+07	2.09944e+07	3.76048e+07	3.46044e+07	3.67778e+07	3.44794e+07	3.81079e+07	3.67942e+07	3.73783e+07	3.80335e+07	3.60006e+07	3.98534e+07	4.00772e+07	3.93212e+07
dihydroorotate	130230	171804	156035	134724	142650	164756	133408	167594	242730	248560	215076	205509	164870	183971	172233	156685	173971	175302	183572	198828	181194	237726	206777	212088	211042	196773	244850	219490	170077	173247	229734	200702	154179	173392	139535	160226	16529.8	176206	151684	198812	170838	170509	162574	140816	134508	129649	141574	176381
dihydroxy-acetone-phosphate	228600	283106	250687	240641	594029	654509	503568	632444	392950	464133	380777	346492	594348	696909	559513	652169	107671	97200.1	132630	87587.3	279313	323926	404239	182850	89165.8	89253.5	52770	93333	163500	181760	108985	166411	168347	141025	138420	141993	148879	239695	217764	256104	133341	141878	144028	159177	236886	151999	202821	153219
Diiodothyronine	N/A	2687.58	N/A	N/A	N/A	N/A	N/A	N/A	N/A	N/A	N/A	N/A	N/A	N/A	N/A	N/A	N/A	N/A	N/A	N/A	N/A	N/A	N/A	N/A	N/A	N/A	N/A	N/A	N/A	N/A	N/A	N/A	N/A	N/A	N/A	N/A	N/A	N/A	N/A	N/A	N/A	N/A	N/A	N/A	N/A	N/A	N/A	N/A
dimethylglycine	1.80254e+06	1.81691e+06	1.71749e+06	1.77169e+06	1.7018e+06	1.7196e+06	1.62159e+06	1.68518e+06	2.3112e+06	2.32581e+06	2.34457e+06	2.3589e+06	2.44754e+06	2.25884e+06	2.2458e+06	2.28146e+06	2.61325e+06	2.53604e+06	2.42785e+06	2.60483e+06	2.67571e+06	2.52297e+06	2.64775e+06	2.70967e+06	2.20327e+06	2.07854e+06	2.1898e+06	2.11687e+06	1.91144e+06	2.01482e+06	1.88852e+06	2.14729e+06	2.01124e+06	1.9271e+06	2.00111e+06	2.09676e+06	1.79364e+06	1.82443e+06	1.64738e+06	1.72746e+06	1.94733e+06	2.00445e+06	1.98996e+06	2.12195e+06	2.06747e+06	2.23161e+06	1.85485e+06	1.98568e+06
DL-Pipecolic acid	4.297e+07	4.15724e+07	4.25721e+07	3.6054e+07	3.12297e+07	3.88598e+07	3.6021e+07	3.63438e+07	4.01216e+07	4.19481e+07	3.70036e+07	3.77476e+07	4.10407e+07	3.93332e+07	4.04038e+07	4.16854e+07	4.93005e+07	4.40076e+07	4.68569e+07	3.90812e+07	2.79881e+07	2.69859e+07	2.8717e+07	2.90087e+07	2.82939e+07	3.48171e+07	3.15248e+07	3.187e+07	3.40176e+07	3.5081e+07	3.4812e+07	3.3914e+07	4.58767e+07	4.26134e+07	4.57956e+07	4.13344e+07	4.14335e+07	3.76474e+07	4.09242e+07	4.11016e+07	3.26168e+07	3.08406e+07	3.29127e+07	2.91652e+07	3.10037e+07	3.4027e+07	3.32153e+07	3.04737e+07
D-sedoheptulose-1-7-phosphate	373437	373860	338026	373215	361036	354388	356823	418117	276327	256151	243311	247908	274578	250761	225058	244657	187061	167741	189634	140045	300468	311190	247062	328216	183738	301759	197612	251877	213914	220325	215952	214375	144403	153489	153754	178023	134057	110575	107925	138783	212475	217481	180722	174211	224494	227192	247260	180874
dTDP-nega	74594.7	68761.6	103801	91386.1	95372.5	126492	78004.5	104946	17764.9	24321.2	14494.3	29317	79903.3	77288.3	59656.3	59110.2	10057.3	12392.1	N/A	10643.4	53099.7	65432.2	97920.3	70438.1	25965.7	24101	36411	28580.6	18707.9	20857.6	15171.4	21321.5	25728.3	38650.2	48459.2	49501	95819	130420	81820.3	90895.6	45224.3	49978.6	43761.5	55951.9	47082.7	51466.7	61122.8	65082.3
dTMP	13982.1	4814.99	11829.9	4830.12	18816.1	20428.1	24733.9	34821.5	N/A	4830.84	N/A	3225.23	17743.3	5902.44	4334.57	4839.61	N/A	N/A	4232.1	N/A	26907.4	38701.4	18769.1	20926	10759.8	4300.55	5904.84	11822.2	4831.02	8600.1	6406.02	13440.7	10188.9	8063.86	10218.4	8610.06	14516.7	16666.1	11292.8	16666.5	14023.3	7502.05	12387.4	21475.4	10220.6	6957.25	10744.8	5300.86
dTMP-nega	34902.9	42677.4	48644.3	30210.5	71633.3	95020.6	78981.2	68515.8	12672	10448.4	8577.53	11289.9	25593.3	31008.4	24291.5	24789.9	7504.32	10859.8	17211.1	10808.6	84348.6	71333.7	84559.7	78763	32309.8	17703.1	25717.3	21088.6	32532.8	22735.5	21462	33228	24868.3	24868.5	32922.1	23111.4	44092.8	37196.2	36197.1	44871.3	32779.7	44279	40681.8	65051.3	32188.4	28551.9	34778.1	49601.9
dTTP-nega	544817	622347	499576	607791	636202	605944	632174	733336	112092	153644	145362	115263	416973	435241	353215	404689	74024.6	75230.6	80848.3	66147.5	338772	319447	299666	340238	120921	201711	130656	167073	111072	103743	97111.3	71145.8	315435	182148	398218	281457	619656	642087	674161	657786	457041	401939	345141	359602	367775	401342	381785	280477
dUMP-nega	47314.6	45970.7	36527.5	52886.4	208204	229751	246138	209415	22789.3	14892.6	18787.9	23579.5	28172	23143.2	26900	22134.6	47978.3	43840.3	39159.5	38712.5	471567	473060	484737	381776	57117.4	54803.7	56421.5	50911.2	52431.6	74851.2	49455.8	55688.7	37370.5	42358.2	37058.1	39318.9	69269.2	89556.1	61627	52343.7	57287.5	57549.5	45998	59093.1	62267.9	63355.4	54128.6	65830.5
dUTP-nega	19410.6	16083.6	11601.9	13805.2	8603.42	24731.9	8466.37	25806.1	11332.2	9185.37	13831.8	3777.76	20229.8	11882.4	13643.5	8634.53	N/A	N/A	N/A	N/A	15128.7	12655.5	13012.6	14774.2	10278.5	10648.6	9398.06	5292.48	6618.37	11242.1	7371.45	4553.01	8977.72	9145.97	3992.63	N/A	12448.3	15622.5	15098.5	15613.6	24108.2	20978	18780.5	19782.2	13994	16180.7	16841.8	17797.1
ethanolamine	122503	118243	120078	122749	156232	177571	126051	145751	81290.4	92901.9	80450.1	78308	121448	135868	103249	91620.7	38946.6	24134.7	21302.7	16282.1	20605.2	32006	27679.3	31029.9	37942.4	46721.6	19832.2	39793.7	35788.6	52568.5	36833.1	45256.1	51641.5	42129.9	65458.6	32409.4	29652.6	52709.2	41183.5	51244.9	110360	120183	128849	145797	107376	166864	108276	138828
FAD	190596	232855	199469	215622	263508	259723	243617	302764	101641	170465	120451	119919	267247	265104	280491	305128	105938	134440	82278.6	228541	435543	456643	496620	433326	224218	191434	157585	347407	80657.3	119917	97867.5	120454	139262	132845	264560	171699	538808	552791	523694	498928	580270	547755	740463	650426	550118	618939	636699	635078
Flavone	9752.2	9682.32	9374.53	5327.85	13869.1	19889.1	5352.55	15094.6	6524.53	15560.9	4652.6	N/A	13815.1	13837.3	7550.5	11584	5928.05	3391.14	13684.8	5550.61	13156.8	6180.27	3721.15	11721.8	5374.37	14342.5	11298.7	9763.75	8234.23	6759.81	5342.78	6049.65	9652.05	9198.6	3665.42	4244.43	4656.78	13355.1	6137.05	N/A	10570.2	10046.6	11232.5	12075.6	16065.8	7315.5	10778.3	15212.8
FMN	N/A	N/A	N/A	4839.61	3241.15	N/A	N/A	3212.63	N/A	N/A	N/A	N/A	N/A	N/A	N/A	4838.04	N/A	N/A	N/A	N/A	6990.11	4837.93	4837.84	3763.67	N/A	4468.73	4839.66	N/A	N/A	N/A	N/A	N/A	4839.77	N/A	5376.93	N/A	3226.47	N/A	4839.77	5801.02	N/A	8014.62	3226.51	N/A	4839.68	3226.74	7527.32	N/A
folate	752051	582875	864674	535407	524569	701055	665867	699788	669902	653041	655542	700106	1.03561e+06	792231	983200	782366	607968	620039	633288	723249	1.14217e+06	1.34068e+06	1.1007e+06	1.24261e+06	492172	441560	462203	468582	359282	395419	360049	433714	606095	495193	534077	531769	763495	699014	632636	763550	726668	861288	731832	754502	697946	843606	788780	792119
fructose-1,6-bisphosphate	475498	573629	572008	514893	398737	370583	202350	220849	45660	68625.6	48070.6	74326.7	128225	128663	119481	122394	121619	132082	121885	91932.7	97282.2	136676	94512.4	107524	154737	78281.6	93955.6	108334	62764.6	80816.2	56944.5	68852.6	125916	125888	150507	154114	196518	303697	274745	257057	87911.3	119627	122501	224748	238765	131899	118143	136811
fructose-6-phosphate	74566.1	80463.1	74374.6	89395.9	57151.7	37010.3	24853.3	46164	16315.1	20373.3	24392.7	18147.6	5474.67	21938.7	15395.6	29015.3	45656.3	30686	33666.8	45655.3	12120.8	23432.5	16684.1	17495.1	84648.8	104629	71903.7	119281	79577.4	57446	64698	78544.8	76278.7	60710.7	62171.4	67581.4	49521	42372.9	41832	32070.8	60059.7	59387.3	49599.8	75780.5	70381.1	61860.7	80683.7	73234.8
fumarate	3.9216e+06	4.06835e+06	3.89916e+06	3.45724e+06	8.78028e+06	8.58858e+06	8.32614e+06	8.79302e+06	5.77943e+06	5.68317e+06	5.37628e+06	5.29775e+06	9.46754e+06	9.61679e+06	8.71117e+06	9.72193e+06	3.58346e+06	3.20873e+06	3.60103e+06	3.43941e+06	5.17721e+06	4.59108e+06	4.71331e+06	4.87657e+06	3.70753e+06	4.62119e+06	3.5803e+06	4.24625e+06	4.99638e+06	4.89258e+06	4.29776e+06	4.83977e+06	5.06702e+06	4.13063e+06	4.42629e+06	4.17835e+06	4.64537e+06	4.58495e+06	4.51184e+06	4.48472e+06	3.06858e+06	2.87715e+06	2.88314e+06	2.68272e+06	3.48264e+06	3.13606e+06	3.57199e+06	3.32509e+06
GDP-nega	139300	178005	210381	193670	162274	183992	211859	189281	165678	109408	118207	111300	195617	193932	192383	210980	38187.6	64970.5	57331.1	69388.8	300087	304158	342087	284958	61820.2	40339.1	61028.7	73670.4	52168.6	42462.7	42483.1	48167	60029.8	78380.4	71109.6	74615	281335	241522	204556	184708	223314	202482	187327	181714	267960	307278	250853	224200
Geranyl-PP	28799.5	58694.6	51184.1	29371.4	41586.2	61108.4	49221.2	44559.5	6263.31	62334.6	8108.63	4700.9	109563	6105.41	103987	108320	18473.6	19404.7	21357.7	39744.3	85548.7	60526.6	91263.5	12368.7	30235.7	19309.4	17418.8	25430.3	38358.5	41204.3	17376.6	27512.2	29873.5	29106	27031.9	14807.4	46396.9	90905	66983.2	34839.5	302612	296138	305766	365703	101332	180825	132334	95209.8
glucono-?-lactone	10218.3	8645.26	11278.5	13443.6	27960.4	27368	23072.2	25272.1	109092	111893	82865.3	104852	120448	100560	116164	127444	10215.4	10213.2	18289.8	13450.4	10637.3	17194.4	11829.9	10225.7	6734.94	9118.86	6893.54	10753.6	7452.68	6828.42	6521.2	7509.62	3752.26	7422.9	13988.4	9695.06	4830.62	5062.04	10739.9	9121.72	51619.1	60253.4	40234.4	50508	60762.8	45707.4	62914.1	38101.5
glucosamine	109251	144816	113791	85415	111029	133294	121018	116309	77216.2	60932.7	87930.9	85173.8	97816.2	86965.2	132097	105828	105443	81064.1	59153.1	61328.2	83408.4	111809	101716	115070	46600.8	55435.6	59643.7	91771.7	48883.9	44817.8	32499.7	72587.4	69687.4	82666.1	69509	39385.5	129595	109361	125244	127041	109116	132242	138525	153568	77809.3	79165.3	102708	117912
glucose-1-phosphate	328269	338957	305345	271243	334786	344693	291482	411399	209598	232856	217064	226310	181901	249151	186357	222255	211769	229356	250333	228490	263406	227782	296379	206334	299337	277913	246217	330075	230306	256957	271585	272014	6.11072e+06	7.22488e+06	6.86041e+06	6.38168e+06	7.40899e+06	7.53348e+06	7.42047e+06	6.52072e+06	154874	134774	151143	168925	154149	156557	158029	154973
glucose-6-phosphate	18766.9	89037.6	21413	58592.6	20134.7	61803.8	29968.9	28787.2	18714.7	12106.1	21514.2	106478	26829	43918.9	37377	42361.3	74896.6	36310.3	57083.3	101509	39064.9	53745.5	28478.2	26700.1	39983.9	19294.4	61391.6	93147.3	94831.5	44710.3	47689.9	65941.2	26338.1	46995.3	64288.9	42359.7	96642.8	29747.2	78873.2	32890.6	66966.4	51011.2	30665.8	16749	74439.4	27185.3	53130.8	37034.1
glutamate	3.91125e+07	4.72456e+07	4.07284e+07	4.04131e+07	4.06457e+07	3.8229e+07	3.58019e+07	3.59615e+07	4.47982e+07	4.59516e+07	4.18506e+07	4.06991e+07	3.97203e+07	3.96617e+07	3.96192e+07	4.04525e+07	4.45763e+07	4.23797e+07	4.19435e+07	4.4175e+07	3.30346e+07	3.39272e+07	3.38239e+07	2.92298e+07	3.88953e+07	3.74754e+07	3.38055e+07	4.0335e+07	3.62337e+07	3.46083e+07	3.53999e+07	3.94079e+07	4.97662e+07	4.92841e+07	4.56496e+07	4.63053e+07	4.73777e+07	4.58797e+07	4.97082e+07	3.98715e+07	3.80728e+07	2.97397e+07	2.98419e+07	3.35775e+07	3.77794e+07	3.32443e+07	2.92774e+07	3.59901e+07
glutamine	4.22754e+07	4.15757e+07	4.30847e+07	4.44396e+07	4.13267e+07	4.54271e+07	4.39816e+07	4.49875e+07	3.79233e+07	3.95278e+07	3.65493e+07	3.5864e+07	3.60119e+07	3.99183e+07	3.94156e+07	3.86595e+07	4.27384e+07	4.0374e+07	4.47001e+07	4.25217e+07	6.2857e+06	5.67418e+06	6.11409e+06	9.01627e+06	1.14271e+07	2.48114e+07	1.21418e+07	1.83965e+07	1.59798e+07	1.46236e+07	1.48476e+07	1.77888e+07	4.29266e+07	3.67542e+07	4.00745e+07	4.18911e+07	3.3082e+07	3.7826e+07	3.65262e+07	3.27169e+07	6.68172e+06	5.41111e+06	5.51224e+06	4.58125e+06	7.27549e+06	7.15493e+06	7.03569e+06	7.68608e+06
glutathione	3.03879e+07	2.97904e+07	3.13892e+07	3.30264e+07	4.067e+07	3.59406e+07	3.04135e+07	3.32924e+07	4.49385e+07	4.31595e+07	4.41773e+07	4.23541e+07	3.47947e+07	3.51367e+07	3.31948e+07	3.11936e+07	3.90435e+07	5.42602e+07	5.09999e+07	4.60153e+07	4.32525e+07	2.91325e+07	2.98333e+07	3.23677e+07	3.3271e+07	3.143e+07	3.1449e+07	2.99143e+07	2.76128e+07	3.46939e+07	3.31152e+07	2.84816e+07	2.43372e+07	1.77864e+07	2.58767e+07	2.64203e+07	1.9874e+07	1.37557e+07	2.08804e+07	2.39642e+07	3.26156e+07	4.09763e+07	4.10373e+07	3.89799e+07	3.73693e+07	3.7561e+07	4.0546e+07	2.72167e+07
glutathione disulfide-nega	2.16354e+07	2.33125e+07	2.18832e+07	2.0161e+07	2.42302e+07	2.38385e+07	2.41764e+07	2.39638e+07	2.04034e+07	2.12725e+07	1.99375e+07	2.33957e+07	2.15908e+07	2.19999e+07	2.2054e+07	2.38572e+07	2.15494e+07	1.91066e+07	2.16167e+07	2.05591e+07	1.84493e+07	1.79947e+07	1.66583e+07	1.70351e+07	2.04648e+07	2.09838e+07	1.86033e+07	2.12464e+07	2.3512e+07	2.27902e+07	2.29846e+07	2.3068e+07	1.89877e+07	1.82871e+07	1.85267e+07	1.73855e+07	1.69122e+07	1.88073e+07	1.64927e+07	1.60395e+07	2.03461e+07	1.94166e+07	2.08509e+07	2.23117e+07	2.2656e+07	1.86896e+07	2.0096e+07	1.93209e+07
glutathione disulfide-posi	1.5502e+07	1.71753e+07	1.61534e+07	1.46347e+07	2.16512e+07	2.05435e+07	2.06639e+07	2.06009e+07	1.42846e+07	1.40979e+07	1.3989e+07	1.61878e+07	1.75961e+07	1.75249e+07	1.85429e+07	1.91201e+07	1.55803e+07	1.23894e+07	1.591e+07	1.40048e+07	1.35486e+07	1.23795e+07	1.36096e+07	1.26699e+07	1.37787e+07	1.37937e+07	1.10508e+07	1.41731e+07	1.62836e+07	1.54342e+07	1.55624e+07	1.86724e+07	1.39065e+07	1.3475e+07	1.24613e+07	9.68757e+06	1.12374e+07	1.45332e+07	1.17051e+07	1.17031e+07	1.30486e+07	1.33014e+07	1.63923e+07	1.61759e+07	1.6278e+07	1.44326e+07	1.38234e+07	1.34386e+07
glutathione-nega	2.25081e+07	2.16126e+07	2.22667e+07	2.33006e+07	2.18924e+07	3.16788e+07	2.10627e+07	2.36069e+07	2.98349e+07	3.03627e+07	2.90171e+07	2.49059e+07	2.93028e+07	1.85308e+07	1.76308e+07	2.35917e+07	3.53712e+07	3.58248e+07	3.69746e+07	3.09332e+07	2.2583e+07	1.89142e+07	2.22217e+07	2.28733e+07	1.88338e+07	2.46424e+07	2.18776e+07	2.25962e+07	1.70658e+07	1.9878e+07	1.78777e+07	1.73855e+07	1.37918e+07	9.86291e+06	1.24774e+07	1.26589e+07	1.0415e+07	7.89925e+06	1.06651e+07	1.32227e+07	2.3943e+07	2.41274e+07	2.41323e+07	2.05516e+07	2.1688e+07	2.43204e+07	2.52282e+07	2.50466e+07
glycerate	13575.8	18284.6	4416.09	12889.1	69051.5	15563	26955.6	7303.46	215239	9505.83	10811.4	177009	122117	14786.1	103730	10351.3	10665	11106.6	14664.2	8757.41	7175.01	6556.69	9075.44	22147.3	19477.3	83014.6	11825.8	102632	130439	114205	97078.3	5714.82	11540	8191.05	16653.5	17503.1	5646.45	4514.06	117877	11499.4	101168	9776.33	123718	96198	5485.17	61021.9	71284.8	50631
Glycerophosphocholine	5.70728e+07	6.01008e+07	5.45316e+07	5.49739e+07	7.37042e+07	6.80931e+07	6.58893e+07	6.44849e+07	5.7387e+07	5.31883e+07	5.39394e+07	3.87876e+07	4.23626e+07	5.38088e+07	5.29762e+07	5.42366e+07	4.15955e+07	3.60509e+07	4.10116e+07	3.64229e+07	3.25001e+07	2.96511e+07	3.35457e+07	3.36566e+07	4.47044e+07	4.55982e+07	4.45148e+07	4.79828e+07	4.67073e+07	4.68021e+07	4.49096e+07	4.75248e+07	2.44085e+07	1.8189e+07	2.17151e+07	1.79662e+07	1.61958e+07	1.90679e+07	1.79233e+07	1.61071e+07	4.04384e+07	4.08078e+07	5.32203e+07	3.92968e+07	4.01626e+07	5.27419e+07	3.90977e+07	4.85096e+07
glycine	122439	115118	91447.6	120962	76894.5	115956	84451.7	70978.1	225739	221801	251660	243748	192440	197717	237135	205948	132283	147350	108156	123143	167871	120449	158097	183161	175495	176873	213344	217151	182222	206483	196766	219929	342711	358708	380726	334998	327482	339312	370381	337648	95768	124749	97339	117194	109727	116708	101637	109233
glycolate	15807.3	26576.9	25126.2	23400.1	36952.9	31418.4	23205.8	27456	24142.8	26808.4	13646.9	38845.9	20870.7	19448.3	8209.13	N/A	13693.5	N/A	30772.3	20756.7	N/A	25829.2	23346.1	15546.3	35546	31878.8	13218	52145.4	47653.1	22614	23362.6	19603	29715.2	18711	11680.4	29973.6	24720.6	16627.6	25849.5	47451.6	33873.6	28372.9	22167.9	20931.5	22061.2	20179.6	29858.9	29097.4
glyoxylate	38610	46867.4	35066.7	32787.4	35692.7	38674.3	38718.1	34449.6	39290.7	25377.8	42753.9	27157.9	37937.6	39469.6	32159.1	41390.2	42755.1	37729.1	33867.3	33191.5	23167.7	19760.4	18585.8	21797.1	40237.4	40025.9	36267.3	50094.1	37329.4	40220.3	39622.7	28314.6	50051.6	33987.7	42386.1	48404.5	37822.8	31169.2	48315.2	35767.2	35189.4	31078.1	32895.3	25206.4	30358.6	31558.2	45541.8	30554.1
GMP	89794.4	141865	191574	133777	118613	110251	106657	121256	325131	709517	204668	536387	248547	164409	230134	175904	339759	352928	186689	253537	582052	627912	556131	549701	190296	493037	388288	577225	375652	462089	330977	414281	545899	307273	702607	545768	296548	435741	205072	236576	478488	298118	341205	216969	478562	343567	255792	216717
GTP-nega	1.30341e+06	1.62286e+06	1.31772e+06	1.72523e+06	1.63217e+06	1.72425e+06	1.86037e+06	2.10118e+06	694155	867201	760550	512426	1.86518e+06	1.9569e+06	1.9109e+06	1.79903e+06	278607	331951	272884	502013	1.68175e+06	1.7448e+06	1.7665e+06	1.43524e+06	415736	424759	321806	420109	228050	274156	196829	257433	315570	327513	590511	508308	1.79287e+06	1.5304e+06	2.0874e+06	1.87553e+06	1.37548e+06	1.30705e+06	1.35409e+06	1.45462e+06	1.50733e+06	2.17424e+06	1.83794e+06	1.71869e+06
Guanidoacetic acid	62891.9	78686.8	85487.8	72663	59381.4	51436.2	57296.9	50131.5	83895.5	79217.9	70999.4	86140.2	69308.9	80318.8	85969.4	89247	99799	94084.9	82437.4	95549.5	73059.9	49644.3	74295.5	68784.6	74859.3	63978.7	88174.5	68746.2	74317.9	65552.5	84245.4	79500	98824.4	59281.4	81989.7	62456.2	62071.8	63458.8	49932.3	58472.4	59868.2	52893.5	72344.5	47023	64653.7	83340	50233.2	69880.3
guanine	23378.5	34180	25071.8	23487.4	24598.6	31849.1	43249.2	14432	71152.1	83697.1	71398.1	66210.4	35203.8	37283.7	22483.5	72577.2	5062.4	26658.9	50855.3	23340	56969.3	41225.1	23154	25788.7	34216.6	10666	41394	34188.8	49005.4	48517.3	39983.5	27833.2	50239.9	13971.3	27133.7	32387.7	30528.6	33499.3	31717.5	12628.8	40711.6	33236.7	20486.7	14943.5	29733.8	16038.8	43941	21770.3
guanosine	8616.44	11490.8	19474.8	10354.3	N/A	6610.83	11300.9	15563.5	29550.9	33908.1	74062.2	39709.1	20653.1	15691.9	19097.8	26983.9	16721.5	13518.6	18170.1	37176.6	23321	26151.5	12710.8	16074.5	14513.1	11315.5	9453.82	10795.3	11796.3	11063.5	16937.5	8578.62	12522.9	12334.1	13927.5	3157.93	5162.25	3702.27	5341.05	N/A	5838.22	5830.33	10832.3	11608	13756.1	7396.05	5355.16	6421.97
guanosine 5-diphosphate,3-diphosphate	55973	75285.7	59693.2	72592.9	46788.8	44112.8	45171.8	47054.5	62906.6	62317.7	37772.4	24812.7	76904.5	80154.5	70441.5	76361.1	32533.4	36916.1	39794	63431.5	111209	108620	89262	116149	6992.79	6810.96	9679.81	12901	10905.9	8604.71	5993.79	7790.64	17208.2	18291.2	26885.9	19861.7	100662	74205.8	70447.2	68253.3	94105.4	88189.8	92491.4	99487.3	46246.4	63585.6	58751	82153.8
hexose-phosphate	3.06972e+06	3.0997e+06	2.77367e+06	3.14822e+06	3.03733e+06	2.57426e+06	2.21415e+06	3.00832e+06	2.39209e+06	2.26392e+06	1.71505e+06	2.35721e+06	2.85901e+06	2.57308e+06	2.47595e+06	2.63029e+06	1.9929e+06	1.46674e+06	1.87053e+06	1.44453e+06	1.98928e+06	2.0356e+06	2.05787e+06	1.97207e+06	5.93473e+06	5.34471e+06	4.90455e+06	5.94273e+06	5.14246e+06	4.42941e+06	4.42159e+06	4.6151e+06	2.24537e+07	2.42077e+07	2.52963e+07	2.3313e+07	2.49567e+07	2.4146e+07	2.32483e+07	2.26912e+07	2.88801e+06	2.62363e+06	2.96753e+06	3.12286e+06	3.06866e+06	2.07663e+06	2.45223e+06	2.73699e+06
histidine	9.62841e+07	9.74193e+07	1.0059e+08	9.67634e+07	1.0318e+08	1.02834e+08	9.86766e+07	1.03021e+08	9.45417e+07	8.99774e+07	9.07033e+07	9.16205e+07	1.02989e+08	1.11112e+08	1.12695e+08	1.10334e+08	1.00611e+08	1.01724e+08	9.64833e+07	9.52036e+07	1.13671e+08	1.03435e+08	1.06944e+08	1.12453e+08	8.8132e+07	9.10684e+07	9.57055e+07	9.4863e+07	9.38587e+07	9.37079e+07	9.28e+07	9.83874e+07	1.02325e+08	9.2465e+07	1.01535e+08	9.99792e+07	1.01634e+08	9.79978e+07	9.91555e+07	9.9593e+07	8.72342e+07	9.30764e+07	9.21412e+07	8.84813e+07	8.75025e+07	8.42624e+07	8.44507e+07	8.9042e+07
histidinol	10719.4	5914.15	7527.31	14544.9	6986.82	10774.5	9144.43	8065.78	11318.3	13981.5	18274.2	20970.6	16064.2	16086.7	7986.04	9679.29	15030.2	6966.76	13809.4	7573.63	9639.03	8609.04	4250.61	4389.48	17737.1	21988.5	20897.4	18273.7	19344.9	23269.5	17432.2	20371	6962.55	8591.51	14936.7	10113.1	7510.58	12893.9	6446.92	4836.59	20964.5	9142.15	13450	13955.4	18846.5	16645	8080.81	11801.2
homocysteic acid	12242	11339.5	11997.9	8314.5	16000.8	9113.26	14063.3	12728.3	N/A	6946.1	6760.04	7063.39	9139.74	8077.65	5992.39	5408.83	9661.28	11829.9	7003.57	11828.5	11759.2	17125.1	17777.7	17268.6	14945.8	8066.5	8945.03	10194	9753.51	11419.5	10838.5	29966.7	16192.6	5863.63	5184.32	8678	11317.8	13114.2	12839.5	11862.2	9163.46	8432.45	4142.41	7634.17	6942.69	6460.38	10590	9144.48
homocysteine	2.393e+06	2.34669e+06	2.22871e+06	1.91268e+06	1.55547e+06	1.55509e+06	1.51899e+06	1.53341e+06	1.79327e+06	1.66923e+06	1.45151e+06	1.4964e+06	1.49212e+06	1.60929e+06	1.72443e+06	1.50174e+06	3.46689e+06	3.35708e+06	3.19541e+06	3.37865e+06	2.2725e+06	2.39114e+06	2.11996e+06	2.09558e+06	6.77557e+06	6.98425e+06	6.59898e+06	6.87427e+06	4.64633e+06	5.43882e+06	5.59173e+06	5.86518e+06	4.04173e+06	3.86461e+06	4.70962e+06	3.71187e+06	3.53988e+06	3.06954e+06	3.54199e+06	3.69507e+06	3.16807e+06	4.36728e+06	4.30065e+06	3.79996e+06	4.04202e+06	4.6131e+06	3.64895e+06	4.6013e+06
homoserine	120444	122341	148323	145191	107814	111149	123319	98824.5	185776	216779	202196	172246	192487	161810	192243	154774	181662	130125	127345	176498	210769	191248	188882	156892	157030	186526	167051	163291	179561	175422	189159	189201	191308	197769	190363	154470	161319	158633	159018	161451	175365	165100	166023	166415	148839	137166	135400	151021
Hydroxyisocaproic acid	21213.1	26000.4	42777.5	17413.6	181737	24167.3	17859.6	19594.9	265736	230916	250353	41975	238622	28654.4	23382.7	24669.8	217600	40865.9	17029.4	20481.6	20154.4	27754.3	27214.1	16429.6	19193.3	240321	12605.8	15993.1	190503	200771	22981.3	214942	216500	25566.5	219308	232190	20736.1	33337.4	22693.8	32945.7	14698.1	41822.4	20500	181968	155198	175046	25724.2	52161.9
Hydroxyphenylacetic acid	474308	461820	29851.1	160992	28897.8	431632	453010	172687	36323.5	45793.7	47613.6	639137	114326	628997	105814	212849	494160	32789.4	477729	181440	535932	201478	196435	224568	165507	39905.3	51039.5	195498	544014	N/A	443574	29811.7	53827	54515.4	212303	174102	139105	49364.2	180539	345402	283145	289186	292226	210411	301592	337627	310771	361516
hydroxyphenylpyruvate	131632	109024	95893.1	102414	88580	107724	100052	90264.7	180636	205345	178130	182433	173226	138066	159034	172072	151485	161061	155326	155677	153388	126331	132693	140316	105674	6473.43	118448	98779.9	90753.3	81130.6	83016	118763	98797.1	8722.69	127171	113941	68566.6	71654	76348.5	6816.93	147722	152460	131713	121246	110609	122539	89065	142976
hydroxyproline	4.6032e+06	4.41385e+06	4.43539e+06	4.11808e+06	2.748e+06	2.86033e+06	3.02518e+06	2.69169e+06	6.94029e+06	7.20667e+06	6.58813e+06	6.89875e+06	5.09893e+06	5.12056e+06	5.64146e+06	5.5518e+06	8.43751e+06	9.04471e+06	7.85985e+06	8.1461e+06	8.87227e+06	8.64043e+06	8.90778e+06	8.93759e+06	1.13293e+07	1.07079e+07	1.10449e+07	1.12979e+07	9.87356e+06	1.07903e+07	9.23398e+06	1.09216e+07	1.12302e+07	1.05303e+07	1.15976e+07	1.09495e+07	1.11871e+07	1.06095e+07	1.01721e+07	1.06166e+07	8.3954e+06	8.81634e+06	8.7924e+06	8.75704e+06	7.02994e+06	9.16746e+06	6.35645e+06	8.52418e+06
hypoxanthine	259935	32796.6	31005.2	26774	66181.6	48107.3	29234.4	67490.3	127663	117802	135938	129694	91411.1	85448.5	97982.7	112112	41996	46963.2	41256.9	55010.9	107105	82877.4	90338.7	132615	92476	127169	90691.6	129826	247886	221349	219398	271492	41261.4	52023.2	140548	45421.1	52382.5	57789.3	56031.6	50760.9	30267.4	30231.8	21980.4	38063.5	24311.7	69153.4	18010.1	26517.7
IDP-nega	577017	850285	932210	969253	1.06539e+06	1.00707e+06	1.03121e+06	1.19114e+06	763375	823035	649299	592728	1.286e+06	1.18415e+06	1.03104e+06	1.06744e+06	143753	218093	196108	194116	1.22742e+06	1.25222e+06	1.01533e+06	1.045e+06	409422	393110	369366	479882	297521	328374	269911	315804	479642	625028	610681	614072	1.04547e+06	1.23266e+06	994056	1.07373e+06	1.138e+06	980720	962533	940256	1.11255e+06	1.33151e+06	1.23858e+06	995336
Imidazole	N/A	N/A	N/A	N/A	N/A	N/A	N/A	N/A	N/A	N/A	N/A	N/A	N/A	N/A	N/A	N/A	N/A	N/A	N/A	N/A	N/A	N/A	N/A	N/A	N/A	N/A	N/A	N/A	N/A	N/A	N/A	N/A	N/A	N/A	N/A	N/A	N/A	N/A	N/A	N/A	N/A	N/A	N/A	N/A	N/A	N/A	N/A	N/A
Imidazoleacetic acid	27571	31047.5	N/A	15820.7	20272	19083.1	36570.3	5763.15	46214.2	28292.2	37611.9	37622.8	43780.6	57941.6	44643.4	40247.9	27052.7	28786.4	34490.8	11530.8	19411.4	37959.4	35185	55918.6	23598.9	29269.5	23188.7	24334.3	22899.1	29842.6	28562.3	15505.6	10476.1	34049.4	29677.9	15853	19310.9	27824.7	11408.3	12662	6234.89	2850.38	47567.4	38123.5	27502.6	8770.49	39090.3	29460.1
IMP	178618	281227	332253	280721	427061	459483	423965	553991	397883	472848	283064	389988	691092	525685	732976	560271	216300	230637	255015	210578	902142	947324	848259	671333	269726	282905	266862	343120	344440	326064	272485	279074	421095	502081	482574	458818	549746	709428	491128	579986	424929	386711	432576	432474	642725	513157	502944	390059
indole	1.06305e+06	1.03784e+06	942806	987418	813150	864921	823750	870136	833311	824835	721407	729156	941851	852710	931701	753617	937373	873961	943426	939487	928263	988954	931649	1.0123e+06	872595	991278	937615	963611	731855	802598	719046	859483	1.70684e+06	1.62655e+06	1.60903e+06	1.59282e+06	1.38551e+06	1.19769e+06	1.20567e+06	1.29042e+06	674500	771852	618899	628745	665967	822279	635666	735685
Indole-3-carboxylic acid	2.17813e+06	2.63713e+06	2.01351e+06	2.28576e+06	2.36879e+06	2.44563e+06	2.25809e+06	2.25578e+06	434802	432609	396467	360570	388254	379208	331913	478982	1.73743e+06	1.66862e+06	1.67375e+06	1.46958e+06	682853	576322	604185	595821	673339	630136	754101	715313	563539	696905	561230	703684	6.4899e+06	7.81168e+06	6.75328e+06	6.98688e+06	6.51815e+06	5.52878e+06	5.50092e+06	5.89727e+06	213275	250481	211378	217900	195868	194980	231533	197490
Indoleacrylic acid	340193	322749	364011	382247	366575	371796	342961	347324	309282	330051	297347	339744	290182	332835	348845	305790	296031	282089	326357	286234	290255	275986	287440	375493	310193	347528	336653	265672	301423	342124	323215	317429	376297	324756	279602	328315	261301	311989	299455	270641	369217	285352	278458	299816	291438	289771	285952	292730
inosine	412268	347203	830753	401429	2.11402e+06	2.11297e+06	1.99022e+06	8.10186e+06	397638	389413	1.03073e+06	382487	957564	4.31768e+06	1.53628e+06	4.3504e+06	459824	380635	416502	664638	3.20826e+06	2.62773e+06	4.56876e+06	1.60663e+06	556054	781359	571202	670451	854490	958105	832660	990754	154275	126832	179635	124739	157234	200073	215207	151041	166583	182140	137342	249353	424516	500123	317349	315782
isocitrate	143310	159446	124729	225944	60550.9	45204.9	52630.9	42104.9	154347	136638	140134	229485	130237	110765	115456	142233	586585	697503	629802	725396	97027.5	65468.3	64076.7	114107	241751	259963	414515	335411	268931	229223	147588	250311	491989	415416	400109	401676	353752	346333	368117	405805	175545	197814	143525	238835	172280	147329	138030	183910
Kynurenic acid	3.87363e+06	2.96241e+06	3.77907e+06	2.9883e+06	472046	587526	456630	554332	1.26018e+06	1.44676e+06	1.20254e+06	1.30829e+06	520415	353283	374253	356558	2.55082e+06	2.69931e+06	2.3348e+06	2.19107e+06	231798	258750	232223	208868	5.65095e+06	5.95732e+06	5.65435e+06	5.94697e+06	3.95268e+06	3.64055e+06	3.41604e+06	4.42819e+06	876833	1.32428e+06	1.06581e+06	1.17002e+06	732321	648739	561110	580106	271752	251946	244368	315250	221008	234998	264744	261301
Kynurenine	424392	383671	356077	444894	982482	1.0774e+06	947365	1.01068e+06	286575	249257	237972	247991	232237	216968	243805	232661	336701	313259	327321	305694	250277	239095	282298	285878	335873	345056	284845	308288	269540	257813	308193	260325	1.11114e+07	1.01292e+07	1.00042e+07	9.68368e+06	6.60804e+06	6.75405e+06	5.92333e+06	6.06765e+06	244920	297671	242814	238060	243534	307184	246569	245737
lactate	8.51737e+07	8.61453e+07	8.6378e+07	8.12362e+07	7.83836e+07	8.18994e+07	8.26256e+07	8.04272e+07	9.33732e+07	9.72648e+07	9.67997e+07	9.4678e+07	9.8226e+07	9.69127e+07	9.56125e+07	9.7489e+07	8.29115e+07	8.25044e+07	8.70399e+07	8.05927e+07	8.83093e+07	8.86374e+07	8.89288e+07	9.43653e+07	7.82476e+07	7.87562e+07	7.78454e+07	7.62786e+07	7.37232e+07	7.49541e+07	7.28243e+07	7.68649e+07	8.33955e+07	8.23657e+07	8.65304e+07	8.65277e+07	7.52646e+07	7.57092e+07	7.46774e+07	7.51548e+07	8.4855e+07	8.73521e+07	8.30966e+07	8.17019e+07	8.03751e+07	8.29319e+07	8.03307e+07	8.2059e+07
L-arginino-succinate	1.15806e+06	1.05412e+06	1.00123e+06	961453	1.02844e+06	977502	835216	1.02354e+06	669879	820147	677052	717271	454719	501297	591821	467226	483417	485615	558637	457420	254558	274236	253411	327865	369777	476235	327221	399793	331798	304278	295428	375889	599836	679213	692175	657016	676047	610904	577481	526445	316434	320545	328677	272645	361004	385437	383409	388429
leucine-isoleucine	6.49809e+07	7.30812e+07	6.87982e+07	6.8499e+07	7.39229e+07	7.3553e+07	7.74133e+07	8.06511e+07	6.06712e+07	6.87178e+07	5.99483e+07	6.38469e+07	7.05771e+07	7.05624e+07	6.88349e+07	7.59978e+07	1.93899e+07	2.04122e+07	6.1845e+07	2.07829e+07	6.77572e+07	6.78936e+07	6.36157e+07	6.61257e+07	2.31211e+07	2.45038e+07	2.18326e+07	2.26904e+07	2.37315e+07	2.5306e+07	2.56413e+07	2.24675e+07	2.39354e+07	2.40724e+07	2.61244e+07	6.34286e+07	7.61648e+07	7.52808e+07	7.62089e+07	7.47101e+07	2.77275e+07	3.1988e+07	6.86629e+07	7.178e+07	7.7325e+07	7.2088e+07	7.32798e+07	7.41549e+07
lipoate	3207.36	N/A	N/A	N/A	4804.84	N/A	N/A	N/A	N/A	3763.6	N/A	N/A	3224.84	N/A	N/A	N/A	N/A	N/A	N/A	N/A	N/A	N/A	N/A	N/A	N/A	6456.21	5912.27	N/A	4839.47	N/A	4299.85	5492.24	N/A	N/A	N/A	3224.57	N/A	N/A	N/A	N/A	N/A	N/A	N/A	N/A	N/A	N/A	N/A	N/A
lysine	2.14195e+07	2.04273e+07	1.9494e+07	1.84088e+07	1.52408e+07	1.64777e+07	1.6444e+07	1.58074e+07	2.4734e+07	2.45872e+07	2.21539e+07	2.21678e+07	2.58579e+07	2.55081e+07	2.22275e+07	2.69084e+07	1.97378e+07	2.1499e+07	2.11175e+07	1.67143e+07	2.22983e+07	1.8804e+07	1.9528e+07	2.30757e+07	1.75933e+07	1.77387e+07	1.59719e+07	1.7555e+07	1.42472e+07	1.62529e+07	1.35119e+07	1.49439e+07	2.19782e+07	2.08561e+07	2.48772e+07	2.06266e+07	1.81213e+07	1.81621e+07	1.73255e+07	1.73647e+07	1.42089e+07	1.66122e+07	1.61589e+07	1.46049e+07	1.36304e+07	1.44109e+07	1.32993e+07	1.41356e+07
malate	1.63177e+07	1.62975e+07	1.6434e+07	1.49548e+07	1.27708e+07	1.23408e+07	1.31944e+07	1.30804e+07	1.95421e+07	1.97959e+07	1.82415e+07	1.88293e+07	1.55989e+07	1.66074e+07	1.57053e+07	1.77673e+07	1.17825e+07	1.38989e+07	1.43808e+07	1.36485e+07	9.16461e+06	7.90506e+06	8.1057e+06	9.19636e+06	1.25414e+07	1.5899e+07	1.47288e+07	1.60177e+07	1.33429e+07	1.27344e+07	1.35436e+07	1.21074e+07	1.84134e+07	1.77766e+07	1.92292e+07	1.99932e+07	1.4488e+07	1.54076e+07	1.69572e+07	1.68084e+07	1.43766e+07	1.44647e+07	1.38891e+07	1.33362e+07	1.47019e+07	1.39624e+07	1.47734e+07	1.56639e+07
Maleic acid	4.21674e+06	4.19611e+06	3.93925e+06	3.44387e+06	8.50877e+06	8.0409e+06	8.15578e+06	8.7544e+06	5.57682e+06	5.33117e+06	4.96234e+06	5.48607e+06	9.40381e+06	9.82289e+06	8.80416e+06	9.50969e+06	3.55956e+06	3.51875e+06	3.45e+06	3.47148e+06	5.05579e+06	4.65839e+06	4.74083e+06	4.70916e+06	3.90366e+06	4.77257e+06	3.47032e+06	3.95622e+06	4.64761e+06	5.02855e+06	4.37629e+06	4.90302e+06	4.77741e+06	4.03339e+06	4.47043e+06	4.32016e+06	4.60174e+06	4.39488e+06	4.37426e+06	4.43449e+06	3.06106e+06	2.69667e+06	3.08813e+06	2.67525e+06	3.61009e+06	3.3821e+06	3.56585e+06	3.16021e+06
malonyl-CoA-nega	N/A	N/A	N/A	N/A	N/A	N/A	N/A	N/A	N/A	N/A	N/A	N/A	N/A	N/A	N/A	N/A	N/A	N/A	N/A	N/A	N/A	N/A	N/A	N/A	N/A	N/A	N/A	N/A	N/A	N/A	N/A	N/A	N/A	N/A	N/A	N/A	N/A	N/A	N/A	N/A	N/A	N/A	N/A	N/A	N/A	N/A	N/A	N/A
malonyl-CoA-posi	N/A	N/A	N/A	N/A	3224.84	N/A	N/A	N/A	N/A	N/A	N/A	N/A	N/A	N/A	N/A	N/A	N/A	N/A	N/A	N/A	N/A	N/A	N/A	N/A	N/A	N/A	N/A	N/A	N/A	N/A	N/A	N/A	N/A	N/A	N/A	N/A	N/A	N/A	N/A	3766.91	N/A	N/A	N/A	N/A	N/A	3765.27	N/A	N/A
methionine	2.52051e+07	2.18948e+07	2.17378e+07	2.16805e+07	1.5342e+07	1.93121e+07	1.71032e+07	1.69963e+07	2.25294e+07	2.34832e+07	2.14686e+07	2.23443e+07	1.80251e+07	1.6295e+07	1.88769e+07	1.69193e+07	2.94069e+07	2.69688e+07	2.72385e+07	2.79149e+07	2.4947e+07	2.4996e+07	2.53674e+07	2.48726e+07	3.24152e+07	3.34434e+07	3.26329e+07	3.01378e+07	3.03401e+07	3.27823e+07	3.03886e+07	3.32886e+07	1.46949e+07	1.6101e+07	1.5169e+07	1.51671e+07	1.09922e+07	1.0769e+07	1.07878e+07	1.0591e+07	1.79104e+07	1.71756e+07	1.57543e+07	1.59621e+07	1.71944e+07	1.61818e+07	1.5232e+07	1.77349e+07
Methionine sulfoxide	1.69102e+06	1.36726e+06	1.33739e+06	1.24878e+06	932051	1.18822e+06	988557	880738	1.43247e+06	1.27389e+06	1.34185e+06	1.33313e+06	1.40608e+06	1.32899e+06	1.09965e+06	1.40688e+06	2.14246e+06	1.79413e+06	2.12283e+06	1.86914e+06	1.85471e+06	1.65768e+06	1.68405e+06	1.72522e+06	1.28521e+06	1.48837e+06	1.40023e+06	1.35875e+06	1.16067e+06	1.20947e+06	1.1549e+06	1.55893e+06	1.44412e+06	1.42304e+06	1.36041e+06	1.31711e+06	1.00682e+06	936064	1.13423e+06	1.03834e+06	1.47932e+06	1.74171e+06	1.85544e+06	1.76557e+06	1.36724e+06	1.23277e+06	1.30844e+06	1.24351e+06
Methylcysteine	1.24539e+07	1.17267e+07	1.14952e+07	1.14864e+07	7.81773e+06	8.39447e+06	9.47417e+06	8.3413e+06	1.17101e+07	1.1532e+07	1.17027e+07	1.242e+07	8.01219e+06	8.54486e+06	9.10866e+06	8.23796e+06	1.52628e+07	1.24e+07	1.37344e+07	1.42326e+07	1.3004e+07	1.25561e+07	1.12487e+07	1.10946e+07	1.3859e+07	1.43082e+07	1.35961e+07	1.3059e+07	1.13302e+07	1.21553e+07	1.11968e+07	1.30785e+07	1.34767e+07	1.28473e+07	1.3406e+07	1.19771e+07	1.045e+07	1.09888e+07	9.96496e+06	9.77458e+06	8.17811e+06	8.42601e+06	8.23259e+06	8.19803e+06	8.39357e+06	8.49004e+06	8.16862e+06	9.58209e+06
Methylmalonic acid	1.48279e+07	1.56356e+07	1.56051e+07	1.392e+07	8.58406e+06	8.96317e+06	9.37407e+06	9.08646e+06	6.74007e+06	6.78815e+06	6.93763e+06	6.92527e+06	5.97597e+06	5.70682e+06	5.56448e+06	6.09805e+06	6.92905e+06	6.88647e+06	6.92471e+06	6.09666e+06	7.44896e+06	7.45628e+06	7.3207e+06	7.44364e+06	7.23565e+06	7.17962e+06	7.30659e+06	6.85416e+06	6.62839e+06	6.7404e+06	6.68086e+06	7.06867e+06	9.87619e+06	9.9314e+06	1.01273e+07	9.70045e+06	7.8227e+06	7.61154e+06	7.72202e+06	8.02314e+06	8.19891e+06	8.90566e+06	8.32654e+06	7.9039e+06	7.48777e+06	7.7468e+06	7.54864e+06	7.88791e+06
methylnicotinamide	74415.3	34629	29224.1	21178.7	13179.4	134919	183682	80919.1	7653.47	14224.6	11255.4	12204.6	8363.91	2984.56	3098.36	10228	48367.7	7093.5	12439.1	17279.2	192059	65946.7	28224.6	26397.5	7239.48	5300	6717.91	2950.6	10988.2	4798.74	6339.6	N/A	25179.7	8656.53	6368.5	23693.1	9177.82	3228.18	16085.5	13009.7	215799	290152	48319.9	263982	7053.07	83086.6	133895	99841.6
myo-inositol	4.71843e+07	4.84932e+07	4.40006e+07	4.50812e+07	5.62651e+07	5.43801e+07	5.31574e+07	5.52683e+07	6.72044e+07	6.78894e+07	6.67427e+07	6.64263e+07	7.7131e+07	7.77498e+07	7.5149e+07	7.6528e+07	5.96405e+07	5.81463e+07	5.90819e+07	5.6657e+07	6.20254e+07	5.89956e+07	6.29158e+07	6.0877e+07	2.61029e+07	3.04762e+07	2.52438e+07	2.86021e+07	3.54986e+07	3.7155e+07	3.55297e+07	3.86898e+07	6.50711e+07	6.35921e+07	6.27143e+07	6.20829e+07	6.21749e+07	6.3743e+07	6.41448e+07	6.39765e+07	5.40835e+07	5.5821e+07	5.52946e+07	5.47957e+07	5.47776e+07	5.42632e+07	5.34513e+07	5.40855e+07
N1-Methyl-2_2-pyridone-3_5-carboximide	5954.44	5898.46	N/A	N/A	N/A	N/A	N/A	8509.96	N/A	N/A	N/A	N/A	N/A	3835.11	N/A	N/A	N/A	4149.19	N/A	N/A	4275.01	N/A	8903.98	N/A	N/A	N/A	N/A	N/A	N/A	N/A	N/A	N/A	N/A	N/A	N/A	N/A	11543.1	N/A	N/A	N/A	N/A	N/A	4496.96	10002	12443.7	N/A	4932.16	N/A
N1-Methyl-2_4-pyridone-3_5-carboximide	11003.8	N/A	3359.54	7133.73	N/A	9386.47	N/A	8377.06	N/A	4207.66	6378.35	6175.36	11577.1	5237.42	13277.1	7710.72	14044.4	4995.39	N/A	N/A	9459.56	5311.24	4069.59	2936.34	12268.3	10469.8	5556.26	9771.92	4997.4	3020.19	N/A	5357.97	N/A	13189.4	N/A	9581.22	4317.96	N/A	8117.11	5738.07	3391.76	7084.52	8963.81	16193.2	13039.2	2940.17	4502.89	4906.83
N6-Acetyl-L-lysine	2.219e+07	4.1586e+07	3.41038e+07	2.92043e+07	2.22199e+07	3.43125e+07	3.59409e+07	3.49887e+07	3.19532e+07	5.34459e+07	4.90873e+07	5.09766e+07	5.2455e+07	4.46284e+07	3.3031e+07	5.52654e+07	3.22402e+07	5.20375e+07	6.0823e+07	4.83761e+07	2.68493e+07	3.19189e+07	4.68331e+07	4.86666e+07	5.01065e+07	4.01173e+07	2.43224e+07	4.60409e+07	3.18417e+07	5.82062e+07	5.17245e+07	5.84903e+07	5.33892e+07	2.56351e+07	2.82595e+07	5.25154e+07	2.84124e+07	4.8869e+07	2.97215e+07	5.33114e+07	2.62606e+07	1.6125e+07	2.99287e+07	2.7934e+07	3.02412e+07	2.89659e+07	2.66507e+07	3.12313e+07
N-acetyl spermidine	50919.6	65148.3	123189	145934	45575.2	52494.2	67614	71284	110701	124621	203866	142250	90677	86219.2	113422	110171	99301.9	66746.1	82812.1	65590.9	452444	467291	205107	96549.1	387822	773560	954471	912170	76146.1	164000	223442	332040	26915.3	39930.6	50430.2	70896.1	15196.3	24081.9	41317.8	28622.4	860050	619176	480922	531091	888797	931456	939834	862745
N-acetyl spermine	178844	185135	254961	258637	93111	214883	230510	190817	153259	173988	192279	139255	11879.4	133672	142942	156797	198707	206712	191157	207527	155659	208899	154196	167982	355472	395235	347204	331653	564439	488056	479676	481032	472796	404572	471629	402516	403604	265544	461833	578744	274315	234767	225959	197484	324788	263956	292368	256162
N-acetyl-glucosamine	492116	429227	433940	451994	155875	155720	128872	155895	313234	313312	306624	291477	260137	200392	251537	180555	216802	221937	206165	213211	162482	175971	205621	152691	316504	274846	263577	331604	198293	238903	202933	268543	259365	225389	244732	258322	184010	152781	201620	144160	261424	306328	242781	321753	293937	261773	205688	265538
N-acetyl-glucosamine-1-phosphate	8.37174e+06	8.88508e+06	8.27937e+06	8.31825e+06	5.00364e+06	4.68415e+06	3.88195e+06	4.03038e+06	3.60724e+06	2.49833e+06	1.97551e+06	3.05354e+06	2.08385e+06	1.73999e+06	1.40612e+06	1.20731e+06	2.20071e+06	1.94719e+06	2.23714e+06	1.18039e+06	209559	228923	151512	210754	747136	1.10763e+06	688022	1.04617e+06	724465	743954	646113	826916	1.30703e+06	1.03984e+06	1.23936e+06	1.00296e+06	1.23437e+06	951921	919000	971898	2.34382e+06	2.26003e+06	2.19078e+06	2.64702e+06	1.99658e+06	1.92037e+06	1.89896e+06	2.13658e+06
N-acetyl-glutamate	966678	941120	890443	937038	214843	214942	205255	273781	649047	642700	499978	618978	270844	207302	275742	282803	958613	846766	854503	867492	99564.9	84910.8	89036.8	99992.7	1.78285e+06	1.91218e+06	1.62977e+06	1.90363e+06	1.12764e+06	846037	1.13727e+06	1.25186e+06	323071	408656	395211	384319	235560	335404	343770	268356	131156	125512	120727	129113	120048	84559.4	91011.2	116360
N-acetyl-glutamine	402019	169346	810600	270127	70650.9	70392	670942	720974	451156	553890	422793	1.09177e+06	576581	166011	253761	377584	153691	153022	440791	107571	245374	325516	301950	326291	1.66639e+06	1.5258e+06	1.59412e+06	1.63546e+06	209896	1.0149e+06	1.21859e+06	1.18318e+06	455353	227387	260515	210817	269873	508797	145251	312180	42567.9	35055.5	73569.3	69755.5	175497	34305.7	70875.1	90021.5
N-Acetyl-L-alanine	1.31453e+07	1.38855e+07	1.36746e+07	1.34444e+07	1.12021e+07	1.16995e+07	1.07843e+07	1.13381e+07	2.39283e+07	2.39861e+07	2.14495e+07	2.40421e+07	2.87069e+07	2.86211e+07	2.78115e+07	3.08812e+07	7.81144e+06	7.6865e+06	8.04203e+06	7.72816e+06	7.70727e+06	6.85443e+06	7.2825e+06	6.82151e+06	2.47665e+07	2.42708e+07	2.26989e+07	2.38788e+07	2.59346e+07	2.79361e+07	2.55166e+07	2.61312e+07	1.04529e+07	1.15268e+07	1.11876e+07	1.20649e+07	1.11088e+07	1.0323e+07	1.14147e+07	1.01502e+07	2.552e+07	2.45008e+07	2.58293e+07	2.48485e+07	2.40533e+07	2.26559e+07	2.41873e+07	2.24437e+07
N-acetyl-L-ornithine	5437.73	10240.7	8690.95	N/A	2833.3	4467.58	5341.41	6182.52	6137.33	N/A	2942	4478.04	N/A	8796.62	N/A	5482.13	N/A	N/A	3316.24	N/A	6103.29	9691.58	4206.54	N/A	8075.86	9216.35	N/A	10979.6	N/A	7436.78	12830.3	N/A	8600.85	3307.73	N/A	4520.22	9478.4	7989.49	10960.7	14998.4	9887.9	N/A	5738.85	N/A	6621.35	8414.55	6647.89	2400.57
N-Acetylputrescine	22070.4	15805.2	10508.5	18712	7546.97	14594.2	N/A	23015.5	25619.8	42672.2	25164	32052.5	20940.2	18208	10594.6	16280.6	26850.8	16830.7	N/A	N/A	6920.95	28612.3	42101.3	22329.7	40903.9	17437.9	92685	113522	N/A	15044.2	37345.7	47486.2	20253.6	56577.1	18020.1	6747.75	15973.6	N/A	13775.9	24844.9	16657.2	17309.4	27330.2	44803.2	45653	12374.8	N/A	11129.2
NAD+_nega	4.48781e+06	5.0489e+06	4.4706e+06	4.42376e+06	2.84726e+06	2.82178e+06	2.49594e+06	2.42946e+06	1.00954e+07	9.259e+06	9.6353e+06	9.89388e+06	5.23841e+06	6.31586e+06	5.95622e+06	6.24684e+06	4.61292e+06	4.86706e+06	5.34391e+06	4.99851e+06	3.86547e+06	4.41972e+06	4.55125e+06	3.96675e+06	8.70306e+06	9.19137e+06	8.63126e+06	8.67717e+06	7.46043e+06	8.11761e+06	7.7346e+06	7.94905e+06	6.38303e+06	6.6314e+06	6.98275e+06	6.85197e+06	5.36292e+06	5.259e+06	5.24303e+06	5.54577e+06	5.14392e+06	5.09843e+06	5.13458e+06	5.30401e+06	5.91061e+06	4.92452e+06	4.26647e+06	4.57116e+06
NAD+_posi	1.26901e+07	1.34731e+07	1.36571e+07	1.3281e+07	9.78539e+06	1.01801e+07	9.24552e+06	1.09963e+07	2.35901e+07	2.42736e+07	2.1314e+07	2.47657e+07	2.19656e+07	2.24176e+07	2.1684e+07	2.21991e+07	1.46235e+07	1.45451e+07	1.4428e+07	1.49094e+07	1.36868e+07	1.31611e+07	1.39676e+07	1.33666e+07	1.95764e+07	2.01478e+07	1.90311e+07	2.04314e+07	1.79117e+07	2.04994e+07	1.86544e+07	1.88846e+07	1.95252e+07	1.95323e+07	1.88142e+07	1.75884e+07	1.77048e+07	1.75856e+07	1.62257e+07	1.74292e+07	1.35865e+07	1.4403e+07	1.46613e+07	1.44067e+07	1.58206e+07	1.33024e+07	1.39568e+07	1.27526e+07
NADH	57019.5	86037.2	82536.9	102702	265112	210761	222626	204866	93567.2	103949	105394	120955	335324	319410	289766	360709	51086.6	38718	45171	51084.5	246288	207021	164006	168316	122084	71450.1	60762.4	76893.6	52159.6	70984.8	71896.5	63990.5	78510.4	87654	95718	102169	281226	254381	288237	240367	89267.1	116695	92492.1	116153	148420	370039	174231	150031
NADH-nega	25274.6	30107.3	33311.7	44097.7	69882.4	66174.4	77547.3	61832.6	28446.4	54198.7	33876.1	39259.3	79581.3	122603	82216.7	118299	26351.6	14519.8	20434.5	23658.7	78506.9	48393.8	48935.1	46782.1	46781.8	36565.6	26346.7	25813.4	25813.2	11128.4	25813.5	31727.6	26346.8	32261.6	29586.6	36030.3	73132	87115.6	60767.8	71552.4	41942.4	33337.7	36030.1	44093.6	47860.7	126908	51621.9	41944
NADP+_nega	266250	284601	290330	300047	599329	587181	511860	592462	137783	189326	173680	127420	616380	634824	510474	533633	74199.8	113417	96340.5	144764	395573	358750	348379	336093	119009	126776	92472	139814	64492.9	87615.1	62379	77412	157823	180945	242007	212948	702755	621676	649494	592299	481647	433191	376754	470426	496743	525576	481905	499759
NADP+_posi	1.39034e+06	1.33433e+06	1.22083e+06	1.65324e+06	3.03175e+06	3.53574e+06	2.97729e+06	3.51661e+06	734599	826660	917080	661752	3.34785e+06	3.40134e+06	3.37732e+06	3.5213e+06	416383	514636	436509	685236	1.86376e+06	2.02779e+06	2.27508e+06	2.01824e+06	676046	506203	552440	703108	365506	423952	310412	439303	902479	1.05474e+06	1.49422e+06	1.10705e+06	3.29719e+06	3.50686e+06	3.21643e+06	4.04837e+06	2.33088e+06	2.088e+06	2.2999e+06	2.06822e+06	2.44249e+06	2.84604e+06	2.66182e+06	2.46353e+06
NADPH	22008.9	25748.9	34378.6	31991.3	4839.73	3763.48	N/A	4824.35	18706.7	16667.5	N/A	20969.9	39839.6	2631.27	17963.4	4826.09	10207.7	7526.03	10737	N/A	6999.09	N/A	3233.25	N/A	N/A	6988.46	9674.82	9686.51	4265.13	16221.6	7952.9	13961.4	13915.4	14520.9	30659.1	23114.2	155236	91982.5	89239.3	117270	48767.4	70697.4	64652.9	43981.4	67762.9	79672.1	61408.1	72745.6
NADPH-nega	5924.53	10217.2	11309.5	18301.9	5375.47	6988.45	5375.53	5376.73	2706.95	5919.2	N/A	4316.13	15592.9	8604.57	10755.5	2687.11	2147.28	N/A	3790.55	3763.68	4839.82	N/A	3224.75	4303.34	N/A	5914.72	3227.55	5364.19	3229.21	N/A	6452.81	5925.66	3722.8	3763.76	10748.5	10750.9	38181.4	32802.3	32274.5	32806.8	12260	16132	14517.7	23670.4	27968	18281.3	33853.5	32246.3
N-carbamoyl-L-aspartate	76860.9	71519.9	74237.3	68848	74807.1	69886.3	64941.8	71604.3	109157	73705.8	80089.5	108908	78960.6	95711.4	115077	80688.2	97259.1	80048.4	59479	95864.1	81717.4	62930.2	82691.2	83889.7	115122	97868.6	110711	112392	94745.1	100021	107566	114491	118144	114943	107799	90891.6	98503.2	118309	113889	107031	53224.5	48933.9	67717.1	50543.5	55289.1	44632.2	53114.5	53732.2
N-carbamoyl-L-aspartate-nega	251673	238567	275295	235012	252237	255416	266319	308511	152491	143074	152230	180872	152630	159558	144790	198401	186916	203487	216750	159978	226794	216186	191106	249453	169887	170685	154708	184990	233148	195172	189291	238759	631474	557740	578669	608655	396837	376425	383947	343684	158527	266147	177462	285982	262272	250587	262425	214563
Ng,NG-dimethyl-L-arginine	3.37872e+07	3.43986e+07	2.83448e+07	2.75654e+07	2.34329e+07	2.62324e+07	3.1501e+07	2.58645e+07	3.31757e+07	3.29419e+07	3.05445e+07	3.08164e+07	4.16235e+07	3.66818e+07	3.35228e+07	3.70137e+07	4.52537e+07	4.35153e+07	4.62686e+07	3.39778e+07	3.42003e+07	3.40869e+07	4.05367e+07	4.22202e+07	4.87365e+07	4.87367e+07	4.1588e+07	4.14131e+07	4.04611e+07	5.04495e+07	4.61743e+07	4.72766e+07	4.6879e+07	4.05804e+07	4.24366e+07	4.21823e+07	4.66655e+07	3.86464e+07	4.22451e+07	3.885e+07	2.32583e+07	2.69146e+07	2.54279e+07	2.43396e+07	2.82612e+07	2.22971e+07	2.45989e+07	2.55075e+07
nicotinamide	7.44505e+07	7.88919e+07	7.15837e+07	6.47463e+07	6.32994e+07	6.77096e+07	6.57068e+07	6.4752e+07	1.02041e+08	1.00888e+08	8.95018e+07	1.00988e+08	5.31515e+07	3.82223e+07	5.26537e+07	9.84927e+07	9.05501e+07	9.05942e+07	9.52497e+07	7.58346e+07	8.93271e+07	8.16681e+07	8.39854e+07	7.77343e+07	7.08409e+07	7.58707e+07	6.76736e+07	6.5334e+07	5.51553e+07	5.97518e+07	5.61974e+07	3.43974e+07	8.07292e+07	7.76436e+07	8.71886e+07	8.2354e+07	3.59335e+07	2.78832e+07	5.55711e+07	5.20082e+07	7.03338e+07	7.375e+07	7.17926e+07	6.98038e+07	5.71317e+07	6.26172e+07	5.72349e+07	6.63129e+07
Nicotinamide Riboside	5544.54	29464.1	28127.1	29580.9	6131.06	21830.3	17455.2	19615	31702.9	16037.2	22433.6	15280.8	23125	40713.6	47208.8	37690.7	57120.2	37671.5	37674.3	25857.5	19048.9	36830.6	24823.2	33420.5	15810.7	21225.5	27650.2	17947.1	20154.2	35755.1	27049	13717.1	16153.6	19853.4	24499.2	21779.5	10300.2	13458.8	12820.6	11715.7	10959.8	14976.4	14827.9	7974.92	19730.6	11588.8	3720.88	13368.3
Nicotinamide ribotide	490394	528081	544939	651175	482842	418512	436114	403265	441920	490647	436430	467762	429650	725378	739186	819788	227861	232127	282198	248103	753382	722956	724421	1.02762e+06	201358	175767	147068	244204	196098	246540	210497	203592	230161	198231	199174	197678	303429	275211	268012	274353	272945	253433	281134	260071	415969	486978	377114	420017
nicotinate	81227.7	144025	79938.2	108629	116489	153942	125217	72799.2	N/A	155118	146504	118639	N/A	61529.8	85558.2	209647	114719	159999	N/A	85957.7	162820	N/A	161878	215482	68429.4	16448.4	56466.6	N/A	49243.7	50348.4	36909.1	55893.1	46438.7	113767	231173	N/A	64860.6	55262.3	N/A	71982.9	62154.1	172673	110922	76186.9	135072	75729	55700.6	81930.7
O8P-O1P	252846	330804	231735	204868	273471	250458	214993	214776	183631	170245	109390	132904	165038	175832	149473	157536	59397.3	51469.8	91503.4	43460.1	174573	175922	148999	197958	73743.3	119255	119158	112253	62777.7	66898.9	93401.6	68388.9	289474	373897	295255	357387	220261	240457	208080	240017	178140	187876	216204	199328	167466	185589	184687	185742
O-acetyl-L-serine	350449	434694	305886	365489	329765	354106	367550	373090	457023	444596	401757	444243	415741	318046	404058	366192	583600	461968	450886	483137	467861	434846	397794	456266	988365	891396	954770	1.20656e+06	673382	804450	726381	790450	529555	512301	507143	508334	536340	475445	466603	541020	261306	313437	315153	257113	288877	329974	283101	304473
OBP	47992.8	32482.4	41257	39062.4	7653.89	12092.5	28949.9	11220.9	21426.8	14319.1	8976.19	14889.3	20122.9	19018.6	5464.96	8923	N/A	13399.1	9482.55	14088.6	14110.9	9699.25	12401.2	12067.7	14299.7	16070.8	9892.8	20400.5	7906.42	9883.27	8559.72	9489.16	21726.7	13143.3	19994.7	16006.4	19974.2	15991.1	17426.9	15133.7	16955.8	8379.62	17312	8821.65	18067.9	15232.9	16040	16675.6
ornithine	9.22901e+06	8.84019e+06	8.22791e+06	7.34163e+06	4.9269e+06	5.35064e+06	6.48093e+06	5.52783e+06	5.67597e+06	5.71576e+06	5.54512e+06	5.15991e+06	6.77285e+06	5.95347e+06	6.12363e+06	6.14752e+06	7.53379e+06	7.04651e+06	6.99451e+06	7.43767e+06	6.64179e+06	6.05983e+06	6.60613e+06	7.24946e+06	2.77163e+06	2.68822e+06	2.02571e+06	2.23507e+06	2.72895e+06	2.75332e+06	2.14742e+06	2.60802e+06	1.17125e+07	1.13178e+07	1.17916e+07	1.2805e+07	7.85051e+06	8.71121e+06	6.37964e+06	7.91224e+06	3.42117e+06	3.53711e+06	3.53601e+06	3.23876e+06	2.62407e+06	2.93686e+06	3.09795e+06	2.89674e+06
orotate	529905	442392	351086	458764	320529	393428	191612	208605	287646	636229	279520	492457	279732	304974	413913	262722	1.06652e+06	1.37621e+06	1.07528e+06	1.03762e+06	425084	333228	264878	396210	617196	605658	569643	543220	496068	489623	426615	370073	643621	523971	641885	828488	584883	492253	425425	580824	471567	388077	474858	688825	417939	378724	556036	423684
orotidine-5-phosphate	10481.4	8179.99	10744.5	6919.86	6421.55	5777.44	5614.03	4809.46	9269	9072.28	6310.29	10970.9	3700.87	N/A	6088.87	8071.55	7547.2	7508.14	18217.6	N/A	13695	17295.9	8025.51	11314.3	N/A	4136.58	9846.13	4215.66	6843.17	7526.35	8036.25	7676.73	6985.26	18198.7	10248	8762.95	5834.22	5817.44	11026	6900.58	8106.05	15440.2	5385.22	14593.9	12434.9	10611.8	5723.98	6444.69
oxaloacetate	723390	847074	751197	727218	721954	730853	699392	716114	761775	700139	679550	1.05929e+06	754460	805709	578478	999697	898646	948622	897767	888270	852207	864436	720469	796070	853066	815737	866128	848631	796852	898245	797382	851895	873256	914038	879246	918891	820751	776666	801985	870541	1.00992e+06	973173	1.02396e+06	1.00232e+06	1.03051e+06	1.0885e+06	877119	1.09756e+06
p-aminobenzoate	54572.1	23981.7	16831.9	24246.8	25685.9	56363.9	35532.9	14309.5	51392.5	30030.7	29127.2	30173	21718.1	22187.8	24188	249303	28529.5	22968.3	32879.6	36517.4	11989.2	25978.1	42468.6	39119.3	58143	61073.8	50074.9	57256.4	27604.1	24803.5	35261.1	79545.1	146232	58927	45971.8	46716.1	27441	34980.4	62379.7	61995.1	21503.6	52102.8	75684.3	78037.3	35075.4	37646.2	49376.2	21204.9
pantothenate	3.45428e+07	3.55057e+07	3.46155e+07	3.45116e+07	3.18583e+07	3.17985e+07	3.30849e+07	3.29662e+07	4.01838e+07	3.96829e+07	3.78801e+07	3.71604e+07	3.81144e+07	4.12345e+07	4.03543e+07	4.18317e+07	3.05201e+07	2.83543e+07	2.94561e+07	2.85435e+07	2.79772e+07	2.64848e+07	2.75752e+07	2.99456e+07	3.73453e+07	3.69331e+07	3.59325e+07	3.49356e+07	3.48178e+07	3.27306e+07	3.38151e+07	3.51555e+07	3.84389e+07	3.74875e+07	3.66465e+07	3.83071e+07	4.08018e+07	4.19574e+07	3.95717e+07	3.89596e+07	3.93112e+07	3.96424e+07	3.84876e+07	3.96599e+07	3.79242e+07	3.8837e+07	3.66191e+07	3.8664e+07
phenylalanine	3.64784e+07	4.04444e+07	3.45171e+07	3.66729e+07	3.53828e+07	3.74073e+07	3.56149e+07	3.70794e+07	3.74369e+07	3.69416e+07	3.81791e+07	3.94001e+07	3.45487e+07	3.71862e+07	3.76432e+07	3.77789e+07	4.00986e+07	3.71194e+07	3.86412e+07	3.79708e+07	3.77672e+07	3.90363e+07	3.63889e+07	3.4197e+07	3.83946e+07	3.75899e+07	3.82088e+07	3.86496e+07	4.04489e+07	3.87113e+07	3.88447e+07	3.924e+07	3.77801e+07	3.79317e+07	3.69005e+07	4.00868e+07	3.91724e+07	3.97223e+07	4.03873e+07	3.89054e+07	4.02459e+07	3.93835e+07	3.80453e+07	4.02138e+07	3.81446e+07	3.8886e+07	3.75731e+07	3.94169e+07
Phenyllactic acid	2.27502e+06	2.49594e+06	2.28932e+06	2.03008e+06	1.88814e+06	2.09136e+06	2.00345e+06	1.86984e+06	1.80054e+06	1.81039e+06	1.8294e+06	1.75883e+06	1.45401e+06	1.58388e+06	1.53746e+06	1.60999e+06	2.35271e+06	2.26876e+06	2.44045e+06	2.39677e+06	1.96553e+06	1.79393e+06	2.07371e+06	2.01893e+06	2.29858e+06	2.40845e+06	2.35085e+06	2.53134e+06	2.21651e+06	2.17803e+06	2.20439e+06	2.3657e+06	2.36322e+06	2.43642e+06	2.6875e+06	2.39368e+06	1.95128e+06	1.99342e+06	1.90797e+06	1.94443e+06	1.762e+06	1.74101e+06	1.46207e+06	1.64027e+06	1.529e+06	1.51072e+06	1.53223e+06	1.63662e+06
Phenylpropiolic acid	1.47755e+07	1.65819e+07	1.41906e+07	1.50977e+07	1.75969e+07	1.76108e+07	1.61413e+07	1.66495e+07	3.45524e+06	4.18071e+06	2.72306e+06	3.50267e+06	1.06994e+07	1.04056e+07	8.9795e+06	9.98442e+06	4.21234e+06	4.20632e+06	4.79698e+06	4.62187e+06	274523	269270	312625	381918	620480	1.41646e+06	558054	1.02153e+06	36032	759957	839647	915842	5.69674e+06	3.42412e+06	4.66184e+06	3.78596e+06	2.03125e+06	2.84712e+06	2.61534e+06	2.08979e+06	356822	70277.9	430332	310393	42501.2	384038	395444	343647
phenylpyruvate	237257	259697	242069	230504	151630	144110	126973	160528	1.69926e+06	1.46995e+06	1.59586e+06	1.48657e+06	269090	261919	330040	339514	1.39773e+06	1.066e+06	1.3365e+06	1.5513e+06	1.10731e+06	1.0142e+06	1.7526e+06	730499	2.27662e+06	1.58919e+06	1.63198e+06	1.66365e+06	907170	1.56288e+06	1.13809e+06	1.61586e+06	1.22195e+06	860616	1.75483e+06	1.01231e+06	853920	365342	863152	1.03103e+06	1.63039e+06	2.43026e+06	2.25281e+06	1.66988e+06	1.69318e+06	2.13978e+06	1.44235e+06	2.21173e+06
phosphoenolpyruvate	333295	401055	395795	87582.7	519188	430765	531808	522031	296288	405327	254714	343234	417949	461844	353827	379192	101444	129523	173753	116539	674554	522888	541548	538355	61770.2	79940.4	80124.7	85651.8	112273	117899	132888	98324.1	162611	129405	136474	162144	360285	476273	555317	351101	138167	172354	252365	247454	364287	201267	255852	323657
Phosphorylcholine	2.14703e+08	3.13167e+07	3.48243e+07	1.68565e+08	1.81062e+08	1.83472e+08	1.89561e+08	1.79421e+08	2.40103e+07	2.34759e+07	2.44882e+07	2.4641e+07	2.06614e+08	1.5808e+08	2.0081e+08	2.0867e+08	1.89169e+08	1.81571e+08	1.93189e+08	1.81947e+08	1.83161e+08	1.62134e+08	1.82745e+08	1.91794e+08	3.10575e+07	9.67224e+07	3.18585e+07	5.38678e+07	1.29076e+08	1.22743e+08	1.06059e+08	8.52073e+07	1.9811e+08	1.62734e+08	1.76701e+08	1.87561e+08	1.27964e+08	1.64568e+08	1.56822e+08	1.39471e+08	1.76574e+08	1.80009e+08	1.82513e+08	1.74979e+08	1.62751e+08	1.25626e+08	1.80072e+08	1.4232e+08
p-hydroxybenzoate	1.02663e+06	738017	903044	646008	1.04187e+06	708266	730380	788679	1.51959e+06	1.59323e+06	39905.4	1.43017e+06	1.01086e+06	1.28694e+06	1.86536e+06	1.8365e+06	906064	866699	1.0121e+06	767907	850983	940709	792269	1.34303e+06	619949	661278	677434	640316	545325	579300	559982	2.10341e+06	714485	777386	868421	801606	499177	536744	685764	758367	1.00301e+06	935478	1.03632e+06	1.54727e+06	766647	815890	739619	773964
prephenate	N/A	N/A	N/A	N/A	N/A	N/A	N/A	N/A	N/A	N/A	N/A	N/A	N/A	N/A	N/A	N/A	N/A	N/A	N/A	N/A	N/A	N/A	3244.16	N/A	N/A	N/A	N/A	N/A	N/A	N/A	N/A	N/A	N/A	N/A	N/A	N/A	N/A	N/A	N/A	N/A	N/A	N/A	N/A	N/A	N/A	N/A	N/A	N/A
proline	6.91488e+06	1.05632e+07	4.27719e+07	3.98023e+07	3.50734e+07	3.46865e+07	3.60118e+07	3.40015e+07	4.21706e+07	4.02024e+07	4.49344e+07	3.99398e+07	3.8853e+07	3.94009e+07	3.96278e+07	4.08614e+07	7.61036e+06	6.45787e+06	7.32606e+06	6.80794e+06	1.19651e+07	4.65381e+07	4.82189e+07	1.08138e+07	1.07934e+07	9.55431e+06	1.04789e+07	9.63613e+06	9.76791e+06	8.43081e+06	9.46437e+06	1.01897e+07	9.11761e+06	7.95651e+06	7.05924e+06	8.15327e+06	4.12088e+06	9.60527e+06	1.01566e+07	6.84635e+06	9.85882e+06	7.55782e+06	1.02767e+07	8.24214e+06	7.87273e+06	1.16372e+07	8.02905e+06	9.3658e+06
propionyl-CoA-nega	N/A	N/A	N/A	N/A	N/A	N/A	N/A	N/A	N/A	N/A	N/A	N/A	N/A	N/A	N/A	N/A	N/A	N/A	N/A	N/A	N/A	N/A	N/A	N/A	N/A	N/A	N/A	N/A	N/A	N/A	N/A	N/A	N/A	N/A	N/A	N/A	N/A	N/A	N/A	N/A	N/A	N/A	N/A	N/A	N/A	N/A	N/A	N/A
propionyl-CoA-posi	N/A	N/A	N/A	N/A	N/A	N/A	N/A	N/A	N/A	N/A	N/A	N/A	N/A	11292.7	N/A	N/A	N/A	N/A	N/A	N/A	N/A	N/A	3763.64	N/A	N/A	N/A	N/A	N/A	N/A	N/A	N/A	N/A	N/A	N/A	3763.64	4294.65	N/A	N/A	11292.6	4300.96	2689.32	N/A	N/A	N/A	2689.31	7528.92	10213.8	N/A
purine	2.40686e+06	2.44842e+06	2.17624e+06	2.25637e+06	1.84099e+06	1.94646e+06	1.95499e+06	2.02092e+06	2.17163e+06	2.18661e+06	1.84562e+06	2.09015e+06	2.18698e+06	2.15347e+06	2.18053e+06	2.02577e+06	2.5996e+06	2.41002e+06	2.34144e+06	2.56019e+06	2.41192e+06	2.43792e+06	2.42594e+06	2.29958e+06	2.15756e+06	2.36078e+06	2.2923e+06	2.21184e+06	2.09769e+06	2.19366e+06	2.07821e+06	2.19804e+06	2.52734e+06	2.37852e+06	2.55453e+06	2.28847e+06	2.16313e+06	2.05603e+06	2.13817e+06	2.26053e+06	1.74358e+06	1.90484e+06	1.71269e+06	1.68046e+06	1.75114e+06	1.87587e+06	1.66242e+06	1.72054e+06
putrescine	340704	336126	480817	802228	679270	733912	562823	416009	1.66179e+06	1.63813e+06	2.32715e+06	2.66617e+06	721116	836320	1.22653e+06	1.51134e+06	474358	414906	524126	724756	1.33123e+06	1.25567e+06	887412	581000	552661	571026	1.4527e+06	1.70349e+06	40579.7	77575.1	325506	525075	246950	64322.5	101713	102906	371877	309751	339158	320584	904579	812678	979161	1.14782e+06	2.0327e+06	1.87032e+06	1.24365e+06	1.04498e+06
Pyridoxamine	N/A	N/A	N/A	5516.25	N/A	4371.46	5572.3	5229.02	N/A	5998.42	N/A	5676.67	N/A	7774.81	7652.72	N/A	5611.3	7606.48	8110.76	N/A	5490.12	N/A	N/A	4965.81	N/A	7359.25	5407.49	6199.49	N/A	4683.67	N/A	5900.14	9296.15	11729.7	10498.3	N/A	6990.57	8330.84	N/A	10869.5	N/A	7759.98	N/A	15318.6	8523.4	6183.97	N/A	N/A
pyridoxine	312960	280224	304185	348099	N/A	269132	294541	N/A	644407	503911	709836	647753	649400	375820	358171	N/A	418435	394110	N/A	411128	N/A	N/A	409187	306548	366139	356060	261813	N/A	N/A	316788	243141	207077	271673	271070	209233	264081	162296	168442	239663	228638	357708	520487	396037	502440	253588	276345	257837	302233
Pyroglutamic acid	6.50207e+06	6.33663e+06	5.59741e+06	5.53719e+06	457875	6.29757e+06	5.16281e+06	5.50517e+06	7.8589e+06	7.65875e+06	7.78626e+06	8.10914e+06	8.30122e+06	8.40021e+06	7.91776e+06	8.69782e+06	5.38963e+06	6.13958e+06	6.33366e+06	5.84933e+06	6.53086e+06	6.19613e+06	6.03443e+06	6.38525e+06	4.90478e+06	5.45967e+06	5.19149e+06	4.96349e+06	299960	271555	243920	4.4888e+06	6.67531e+06	6.39454e+06	6.17856e+06	5.91121e+06	4.49453e+06	4.64841e+06	4.292e+06	4.55459e+06	6.55996e+06	7.53831e+06	6.71633e+06	6.15691e+06	5.56351e+06	6.34447e+06	4.99728e+06	5.93426e+06
Pyrophosphate	655929	821897	701215	737385	561983	571839	482067	739179	955944	1.08601e+06	793120	439682	1.16968e+06	1.18067e+06	1.14346e+06	1.07002e+06	808808	1.09433e+06	961398	1.05926e+06	1.5139e+06	1.51354e+06	1.50511e+06	1.58018e+06	535312	586258	662028	795789	602263	591295	574051	613988	935802	835616	1.114e+06	1.27142e+06	1.02287e+06	1.00117e+06	1.17174e+06	1.15172e+06	866160	937789	939810	940707	818460	804679	796292	894083
pyruvate	134543	94542.7	87356	68400.6	81567	72218.1	62142.5	47623.1	97677.7	96683.4	62272.6	97405.1	122667	90237.3	54332.6	69763.5	131079	149234	184621	132944	63948.7	55453.9	91970.5	74512.4	86040.6	79055.5	87980.2	91656.7	57943.1	87451.1	74925.6	82206.5	99587.3	103844	96243.2	74283.2	72921.6	80946	94871.6	89714.7	142557	127433	89071.4	102982	120507	80110.7	106200	69465.3
quinolinate	171677	135610	128905	132802	142351	154309	43030.2	166283	150126	136249	114304	164703	124895	120760	120754	133031	116402	123535	135068	122710	132847	136920	180205	154396	38607.9	175554	34951.9	29214.7	121992	123252	180080	136457	160259	135594	145623	148452	185656	179219	130078	177331	170907	175599	62574.2	194010	182106	134271	184492	191523
riboflavin	5218.55	N/A	11198.4	N/A	N/A	N/A	9315.73	4848.42	17837.5	17007.7	4795.03	N/A	N/A	N/A	20983.3	N/A	35149.4	17695.1	N/A	N/A	25251	21061.8	4880.68	24328.6	15654	N/A	11071.1	N/A	10734.2	N/A	N/A	11697.9	4706.91	23538.6	5612.83	5286.77	4615.74	N/A	N/A	6446.12	19908.2	N/A	16652.8	N/A	N/A	N/A	N/A	9197.39
ribose-phosphate	645710	546379	543287	524132	668761	684546	707840	757111	354686	353829	431003	389903	410613	562063	414251	489488	437275	492940	494783	480952	721006	830242	777814	693784	648064	338270	456925	382343	396846	449992	392903	508335	537464	531855	575053	504598	514337	484437	488532	549090	476707	452037	457963	538720	474692	534212	457671	496711
S-adenosyl-L-homocysteine-nega	424752	1.42929e+06	1.76256e+06	887017	1.78266e+06	1.66889e+06	1.95232e+06	1.72037e+06	455273	468947	316332	428013	1.68365e+06	684010	711517	679184	1.02123e+06	1.36162e+06	1.07004e+06	1.08208e+06	784190	791513	537176	495895	1.6665e+06	1.77823e+06	2.21852e+06	1.71241e+06	2.25998e+06	1.4632e+06	2.03812e+06	1.52912e+06	936830	1.95076e+06	949503	1.42822e+06	911725	1.61124e+06	769217	940429	2.07648e+06	925557	1.14315e+06	1.07783e+06	1.01723e+06	921948	1.06298e+06	905719
S-adenosyl-L-homoCysteine-posi	457338	1.25228e+06	1.59776e+06	1.05453e+06	2.10663e+06	1.68502e+06	2.28194e+06	2.80027e+06	650400	498475	371668	538856	1.68786e+06	754976	774711	824706	1.22671e+06	1.42159e+06	1.17465e+06	1.27451e+06	735671	896932	678081	581856	2.01793e+06	1.81385e+06	2.92063e+06	2.26745e+06	3.44154e+06	1.55203e+06	2.45126e+06	2.09706e+06	1.51774e+06	2.4015e+06	1.20027e+06	2.0476e+06	1.06417e+06	2.24068e+06	927354	1.47218e+06	2.45055e+06	1.09788e+06	1.24257e+06	1.34212e+06	1.01555e+06	1.0567e+06	1.21765e+06	1.05393e+06
S-adenosyl-L-methioninamine	N/A	N/A	6989.8	4302.46	5346.9	N/A	4836.49	3201.22	N/A	231977	351285	260508	4299.19	N/A	N/A	4839.49	7641.51	N/A	N/A	4839.69	N/A	6473.96	N/A	N/A	26872.1	8598.26	3513.16	N/A	3224.91	20075.4	14501.5	19242.9	10097.8	6701.44	9141.91	5385.9	15585.3	11292.4	19331.2	N/A	N/A	4846.71	N/A	N/A	10216.4	N/A	5373.35	N/A
S-adenosyl-L-methionine	4.3273e+06	3.89459e+06	3.20639e+06	4.14388e+06	5.06666e+06	5.32099e+06	5.64855e+06	5.77009e+06	1.10008e+07	1.22541e+07	1.05189e+07	1.03903e+07	2.24684e+07	2.26628e+07	2.17106e+07	2.20977e+07	2.35109e+06	2.34824e+06	2.26089e+06	2.62152e+06	3.36099e+06	2.57905e+06	3.87773e+06	4.10731e+06	5.1961e+06	5.18382e+06	4.01654e+06	6.24715e+06	2.72882e+06	4.818e+06	2.7539e+06	4.21751e+06	8.44099e+06	6.15666e+06	8.21432e+06	7.17558e+06	5.35678e+06	5.23028e+06	6.39743e+06	5.74123e+06	6.35587e+06	7.39212e+06	9.97127e+06	8.29261e+06	5.67312e+06	5.66826e+06	5.7848e+06	6.58116e+06
sarcosine	1.28009e+07	1.19552e+07	1.19031e+07	1.14187e+07	5.58923e+06	6.03104e+06	5.97379e+06	5.67073e+06	1.81572e+07	1.71471e+07	1.67125e+07	1.75729e+07	1.20836e+07	1.19045e+07	1.23934e+07	1.22841e+07	6.82729e+06	6.14692e+06	6.83797e+06	6.13092e+06	2.22958e+06	1.78111e+06	1.83972e+06	1.7126e+06	1.29756e+07	1.37511e+07	1.27904e+07	1.2503e+07	1.16899e+07	1.14861e+07	1.14628e+07	1.29202e+07	1.33644e+07	1.24411e+07	1.37111e+07	1.37624e+07	1.15593e+07	1.17785e+07	1.16087e+07	1.16455e+07	1.59565e+07	1.68038e+07	1.67876e+07	1.75424e+07	1.63707e+07	1.58703e+07	1.58265e+07	1.48252e+07
SBP	45944.3	37888.9	75394.3	56223.4	79688.6	59560.2	102963	41468.6	N/A	16745.2	21562.2	29888.7	48266.1	32795.4	77285.5	53337.5	21932.3	34777.1	31187.2	36058.8	126115	137169	88534.5	66584.9	22550.9	20801.6	24735.8	40452.4	18266.3	38607.6	26491.6	25041.7	29740.1	22949.9	43955.3	24523.6	29710.4	43334.9	73161.6	5305.59	57819.9	59102.7	37527.8	49123.6	35342.9	33849	58563.8	40731.7
serine	1.44492e+06	674502	654744	697278	1.13124e+06	910424	791989	1.07143e+06	5.38218e+06	5.65937e+06	5.03136e+06	5.23208e+06	2.70088e+06	2.92468e+06	2.88554e+06	2.64914e+06	1.44988e+06	1.53363e+06	1.48483e+06	1.48892e+06	1.2492e+07	1.11713e+07	1.20586e+07	1.16556e+07	2.68048e+06	2.65876e+06	2.36874e+06	2.67889e+06	2.83041e+06	2.91338e+06	2.59735e+06	3.08254e+06	3.08209e+06	2.78921e+06	3.12823e+06	3.13321e+06	3.46469e+06	3.22831e+06	3.23064e+06	3.48342e+06	2.09854e+06	2.03653e+06	2.12184e+06	2.07339e+06	1.5243e+06	1.4738e+06	1.56344e+06	1.45092e+06
shikimate	620930	2.18642e+06	468493	2.22086e+06	1.84806e+06	2.22252e+06	2.23437e+06	1.95813e+06	1.29547e+07	1.55122e+07	1.32738e+07	1.35931e+07	1.79122e+07	1.63363e+07	3.63377e+06	1.29533e+07	3.40782e+06	4.68549e+06	4.27848e+06	4.26546e+06	6.29442e+06	5.88422e+06	5.87372e+06	4.75967e+06	2.70873e+07	2.33795e+07	2.35907e+07	2.10102e+07	1.98781e+07	1.93837e+07	1.97303e+07	2.08552e+07	8.28141e+06	6.77294e+06	7.64457e+06	7.23625e+06	6.97172e+06	5.27792e+06	6.49384e+06	6.88369e+06	1.90836e+07	1.94369e+07	1.85811e+07	1.57224e+07	1.74447e+07	1.28913e+07	1.00193e+07	1.84307e+07
shikimate-3-phosphate	4823.26	13566.4	4130.6	9562.81	5733.55	7612.54	6270.47	19444.9	19133.8	15352	15675.4	3291.94	3106.84	23781.1	6168.6	20990.6	6108.84	5150.7	14501.6	16345.2	15132.9	11961.8	17689.3	8673.41	4295.83	4250.14	3574.94	20410.6	2988.06	N/A	4407.44	24325.8	18141.6	5783.08	8607.03	6629.01	9062.37	21016.4	17534.8	9701.28	5284.75	22177.9	5700.14	40741.7	12339.6	6785.15	9193.45	9688.37
S-methyl-5-thioadenosine	39837.2	48373.1	18230.3	11544.1	21612.5	15390.7	28378.2	21374.5	25381.4	146414	86772.1	139094	55263.5	121318	29659.2	141706	19332.9	14502.3	36857.1	13943.9	32883.9	26891.5	72134.6	56614	30724.5	49963.7	46232.6	41681	26452.6	49453.9	35975.7	16628.2	32706	16492.3	48947.7	N/A	N/A	32354.7	52001	33517.3	51209.8	31092	52724.1	32878.9	44206.2	48970.2	42074.5	21527.4
sn-glycerol-3-phosphate	3.36013e+06	4.13372e+06	3.43379e+06	3.5921e+06	6.57552e+06	4.47948e+06	5.38129e+06	6.4138e+06	3.7697e+06	3.75896e+06	3.63329e+06	3.40606e+06	1.48812e+07	1.48776e+07	1.3754e+07	1.56108e+07	2.23568e+06	1.93785e+06	1.73968e+06	2.37538e+06	4.38836e+06	3.65349e+06	4.39284e+06	3.97639e+06	3.19409e+06	3.64804e+06	3.18288e+06	3.1056e+06	4.28962e+06	4.44905e+06	4.09585e+06	3.49387e+06	2.7392e+06	2.82657e+06	2.59944e+06	2.67608e+06	2.93507e+06	2.86593e+06	2.31991e+06	2.55521e+06	1.83352e+06	1.64406e+06	1.52682e+06	1.36118e+06	1.69976e+06	2.20009e+06	2.15631e+06	1.9552e+06
spermidine	2.69953e+06	3.07656e+06	3.02158e+06	2.99058e+06	2.84194e+06	2.98708e+06	2.71414e+06	2.63726e+06	2.38673e+06	2.83661e+06	2.51298e+06	2.34958e+06	2.07304e+06	2.47443e+06	2.51102e+06	2.52951e+06	2.7316e+06	3.39246e+06	2.63931e+06	3.15971e+06	2.08547e+06	2.26177e+06	2.00484e+06	2.42311e+06	3.26299e+06	3.91344e+06	3.28269e+06	2.83593e+06	3.69874e+06	4.33578e+06	4.01741e+06	3.23768e+06	3.56536e+06	3.72888e+06	3.92435e+06	3.15502e+06	3.2877e+06	2.60688e+06	3.65645e+06	3.83362e+06	2.93944e+06	2.46924e+06	2.38196e+06	2.15684e+06	3.06634e+06	2.86609e+06	2.716e+06	2.22169e+06
spermine	5826.11	10634.9	9022.78	11094.2	7057.64	6345.25	3282.72	6867.52	N/A	4956.23	N/A	16748.6	N/A	4657.44	10338.3	7173.54	14165.4	4822.98	20854.8	5889.82	12747	7301.25	4480.13	8971.87	4350.27	N/A	6828.18	8225.62	3012.76	7737.71	6888.62	N/A	3838.94	N/A	N/A	6842.28	7044.21	N/A	13442.7	8381.08	6562.75	N/A	9529.7	N/A	N/A	5799.63	2857.82	8147.2
S-ribosyl-L-homocysteine-nega	15090.1	12867.2	17513.4	11701.1	9270.28	N/A	21342.4	9906.23	14524.1	17887.9	5331.6	9922.98	18753.8	13843.7	15941.6	13479	10131.4	14802.7	10132.5	11376.4	16365.3	16960.8	11620	27596.5	13726.4	13884.8	6329.25	7322.48	10804.9	7245.93	7947.76	5302.4	8920.62	10316.2	N/A	8121.58	6372.1	4102.15	9587.89	15925.2	15074.2	14659.9	20259.7	10845.6	11715.8	18918.6	15630	15287.8
S-ribosyl-L-homocysteine-posi	17328.7	5384.3	9135.01	11800.5	14515.6	14483.5	11802.8	11294.2	22099.5	26817.9	17365.8	17757.6	34278.3	32987.2	33342.1	29789.6	31662.6	25408.1	34455	41412.1	24156.7	32425.3	29375.1	32645.4	63154.4	68755.5	69321.8	67831	56742.4	163605	65068.6	183302	67760	63536.1	47325.6	62902.4	74207.6	62362.6	53337.7	73688.8	16470	21509.1	36068.5	20982.3	24202.5	32762.9	22050.4	28273.8
succinate	1.29518e+07	1.34167e+07	1.35746e+07	1.18172e+07	7.30268e+06	7.87962e+06	8.06517e+06	8.34499e+06	5.9271e+06	5.65533e+06	5.83339e+06	5.8574e+06	5.08354e+06	4.96192e+06	4.69986e+06	5.09518e+06	5.87068e+06	5.94099e+06	5.723e+06	5.32545e+06	6.00385e+06	6.35366e+06	6.2249e+06	6.18762e+06	6.02814e+06	6.22478e+06	5.92466e+06	5.71167e+06	5.452e+06	5.99795e+06	5.69964e+06	5.83117e+06	7.94659e+06	8.37739e+06	8.40804e+06	8.25867e+06	6.908e+06	6.52977e+06	6.80661e+06	6.63317e+06	6.93558e+06	7.6108e+06	6.83462e+06	6.58244e+06	6.49461e+06	6.96366e+06	6.39699e+06	6.89257e+06
succinyl-CoA-methylmalonyl-CoA-nega	N/A	N/A	N/A	N/A	N/A	N/A	N/A	N/A	N/A	N/A	N/A	N/A	N/A	N/A	N/A	N/A	N/A	N/A	N/A	N/A	N/A	N/A	N/A	N/A	N/A	N/A	N/A	N/A	N/A	N/A	N/A	N/A	N/A	N/A	N/A	N/A	N/A	N/A	2687.08	N/A	N/A	N/A	N/A	N/A	N/A	N/A	N/A	N/A
succinyl-CoA-posi	8075.21	3763.84	8075.12	11293.3	N/A	11828.1	N/A	14517.5	N/A	N/A	5915.57	N/A	4834.55	5915.97	N/A	10753.1	N/A	N/A	N/A	2688.98	23005.5	25337.2	37631.4	15594.9	21507.4	23127.1	9677.73	23660.4	N/A	8064.63	7528.82	15057.8	30115.7	12911.6	49194.9	21507.3	179588	66681	122695	168293	41932	133325	109595	100022	97905.5	140370	101128	165067
taurine	3.99245e+07	3.9635e+07	3.90315e+07	3.98029e+07	4.41903e+07	4.13451e+07	4.25001e+07	57429.9	21439.3	14707.6	4.1015e+07	36869.5	26400.7	15667	39401.3	19941.8	4.29468e+07	4.12564e+07	4.03815e+07	4.24546e+07	3.81388e+07	3.74585e+07	21040	33180.4	4.07028e+07	4.07761e+07	4.18976e+07	4.11254e+07	4.25591e+07	4.11763e+07	4.09912e+07	3.93399e+07	4.0788e+07	4.12289e+07	3.97653e+07	3.79995e+07	4.2994e+07	4.27848e+07	4.01462e+07	3.95688e+07	3.96683e+07	4.31421e+07	4.0513e+07	4.24527e+07	4.03463e+07	3.97318e+07	4.12206e+07	4.03682e+07
Taurodeoxycholic acid	16701.3	15986.5	11228.5	13441.1	13444.8	15056.5	16149.5	18280.4	13442.3	12365.3	13977.5	11303	12362	14526.6	9648.98	8607.44	22585.2	12849.9	16128.5	10216.5	17317.4	13441.8	11279.9	16670.2	22051.3	18284.5	13442.9	18282.6	23662.9	18825.2	10755.5	21506.4	8117.92	10741.6	13443.2	11385.7	10755.1	10756.4	11252.9	12977.4	9142.21	8074.56	9684.56	9965.38	8604.26	6989.92	12572.8	13167.1
thiamine	N/A	N/A	N/A	N/A	N/A	N/A	N/A	N/A	N/A	N/A	N/A	N/A	N/A	N/A	N/A	N/A	N/A	N/A	N/A	N/A	N/A	N/A	N/A	N/A	N/A	N/A	N/A	N/A	N/A	N/A	N/A	N/A	N/A	N/A	N/A	N/A	N/A	N/A	N/A	N/A	N/A	N/A	N/A	N/A	N/A	N/A	N/A	N/A
Thiamine pyrophosphate	42382.3	81010.2	67188.8	65472	51222.5	48922.6	63028.3	72089.5	193064	195549	174757	188461	182329	173219	169489	166881	347618	373982	378769	421941	349232	300073	322173	370576	292252	270587	300748	355041	188910	240561	184552	255724	279279	247551	316176	329046	327932	297428	300506	319424	167893	163808	136822	131954	114565	107801	88749.8	105643
thiamine-phosphate	4826.06	23651.5	7495.94	8064.62	5383.02	12389.6	10316.9	3757.48	7139.95	12784.5	11203.7	19089.4	30089.7	29557.4	18917	22583.5	47467.1	64649.9	52760.4	55664.7	53141.2	62900.5	62942.1	40337.6	52836	29710.2	71472.5	14291	49757.6	24638.5	48476.2	31129.5	60373.2	62566.7	69263.1	61144.9	59687.9	57484.6	63918.4	71590	24195.5	16286.6	14472.8	16143.8	16141.2	14442.3	12902.5	17725.4
threonine	4.28613e+07	4.12011e+07	4.36801e+07	4.18409e+07	3.70843e+07	4.21955e+07	4.08872e+07	3.84899e+07	4.21335e+07	4.5782e+07	4.40981e+07	4.58085e+07	4.0557e+07	3.91081e+07	4.04985e+07	3.94916e+07	4.79349e+07	5.16471e+07	4.91007e+07	4.85845e+07	5.04991e+07	4.53501e+07	4.85169e+07	4.58268e+07	5.74209e+07	5.40153e+07	5.39309e+07	5.43117e+07	5.39198e+07	5.48755e+07	5.3857e+07	5.46069e+07	5.55684e+07	5.72262e+07	5.4308e+07	4.99324e+07	5.46798e+07	5.41984e+07	4.98179e+07	5.19509e+07	4.99557e+07	4.78199e+07	4.3759e+07	4.6061e+07	4.46425e+07	4.67718e+07	4.48227e+07	4.61435e+07
thymidine	4845.97	9647.04	10216.4	10752.5	N/A	N/A	N/A	N/A	N/A	N/A	N/A	N/A	N/A	4838.14	N/A	N/A	10770.7	12928.6	4841.3	9145.16	14520.1	13972.7	7522.7	13443.2	15610.1	9687.74	15599.2	5376.82	5955.58	8615.12	3216.15	8586.82	N/A	N/A	3220.23	3227.43	N/A	N/A	N/A	N/A	N/A	N/A	N/A	N/A	N/A	4299.59	3764.34	N/A
thymine	71061.8	71690.4	53994.7	59105.9	77732.1	55111.8	74023	68863.8	19533.4	44445.3	28176.2	51352.7	48184.5	42192	36425.5	32750.3	152561	74942.7	170699	183723	40024	35088.4	39021.4	41361.6	48237.9	39331.2	42898.4	46414	45814.3	52929.1	55601.8	43098.1	61068.4	46572	57054.4	50218.1	38284.9	49420.9	41734.6	39262.1	54076.4	48690.6	63752.3	83931.1	41447.2	37243.8	49403.8	59850.2
trans, trans-farnesyl diphosphate	7032.93	19752.9	14242.5	10765.3	11198.9	18173	13017.7	4808.74	4810.9	8723.42	6203.14	8552.47	12053.6	8673.78	10946.5	15384.7	4805.1	11160	N/A	4341.06	12884.5	17525.7	9246.54	11225.9	5326.47	N/A	N/A	8531.19	5125.58	4863.62	N/A	6926.08	5410.38	5564.88	10863	5298.42	8930.02	15300	N/A	7787.63	19661.5	13249.7	8975.05	11666	4698.77	7526.41	N/A	8371.01
trehalose-6-Phosphate	1.8334e+06	2.20143e+06	1.40135e+06	1.89628e+06	932589	1.03128e+06	776124	1.02248e+06	1.4794e+06	1.49812e+06	1.04547e+06	1.49764e+06	1.67326e+06	1.78421e+06	1.662e+06	1.59043e+06	188509	132873	153237	125069	25335.7	29919.9	22904.8	28580	2.08498e+06	2.55135e+06	1.82717e+06	2.52038e+06	2.26719e+06	1.66197e+06	1.79959e+06	2.02835e+06	400457	331122	395076	282606	370199	444371	432857	501442	2.62198e+06	2.58962e+06	2.79033e+06	2.84594e+06	2.52217e+06	1.98537e+06	2.76008e+06	2.82544e+06
trehalose-sucrose	55711.3	97878.2	128425	159622	98530	122692	6400.35	141665	123819	137605	71435.2	54812.8	155849	51161.1	399619	69083.7	135543	133510	159466	161116	137783	113949	75163.6	168065	120858	94958.6	140690	360558	285076	97381.8	171488	380265	163087	157040	184515	67394	538629	187558	58016.1	103949	185570	170760	160167	78756.5	116918	49235.5	237485	146521
tryptophan	3.74307e+06	3.48863e+06	3.38077e+06	3.34552e+06	2.53663e+06	2.5138e+06	2.3272e+06	2.72865e+06	7.47204e+06	8.05313e+06	7.34037e+06	7.71125e+06	6.2708e+06	6.27119e+06	6.23445e+06	5.80775e+06	6.07678e+06	5.07649e+06	6.15809e+06	5.77427e+06	870791	1.08135e+06	908531	1.00556e+06	6.19037e+06	5.03775e+06	5.92683e+06	4.84896e+06	5.34691e+06	6.08379e+06	5.19794e+06	5.83383e+06	6.39528e+06	6.09237e+06	6.18332e+06	6.19213e+06	6.47102e+06	5.48995e+06	6.18095e+06	6.60987e+06	2.5582e+06	2.68837e+06	2.33471e+06	2.9077e+06	2.24324e+06	2.28556e+06	2.48705e+06	2.29518e+06
tyrosine	3.79549e+07	3.67863e+07	3.60619e+07	3.42681e+07	2.57007e+07	2.98852e+07	2.92217e+07	2.84861e+07	3.73063e+07	3.50706e+07	3.3056e+07	3.64762e+07	2.88717e+07	2.94772e+07	2.95634e+07	2.62701e+07	3.98878e+07	3.49617e+07	4.00117e+07	4.00984e+07	3.77956e+07	3.49825e+07	3.63087e+07	3.50517e+07	3.87711e+07	3.84661e+07	3.63985e+07	3.71015e+07	3.58897e+07	3.75607e+07	3.60459e+07	3.69467e+07	3.73073e+07	3.93957e+07	3.66584e+07	3.59151e+07	3.49516e+07	2.80545e+07	3.23249e+07	3.37956e+07	2.90417e+07	2.98674e+07	2.86442e+07	2.93342e+07	2.93944e+07	2.97583e+07	2.70779e+07	2.88381e+07
UDP-D-glucose	2.88307e+06	3.10393e+06	2.61399e+06	2.42573e+06	3.3684e+06	3.58241e+06	3.44215e+06	3.57169e+06	1.65128e+06	1.59554e+06	1.67369e+06	1.61945e+06	2.55319e+06	2.46942e+06	2.43251e+06	2.66573e+06	440384	467345	483968	479113	415122	308112	354369	387732	1.64279e+06	2.00925e+06	1.57449e+06	2.28292e+06	1.91561e+06	2.5951e+06	2.1556e+06	2.32975e+06	3.15424e+06	2.7169e+06	3.60646e+06	3.11191e+06	4.88088e+06	4.78804e+06	4.49921e+06	4.91752e+06	1.09335e+06	1.33418e+06	1.43429e+06	1.77738e+06	2.10956e+06	2.08182e+06	2.16121e+06	1.96222e+06
UDP-D-glucuronate	367630	420597	443637	489885	662514	787791	831901	1.04156e+06	154329	193590	157558	156684	911445	668270	690941	748565	88190.1	108625	80125.6	155954	1.19589e+06	1.12706e+06	1.21838e+06	1.14004e+06	236112	229121	195077	358676	89812	130670	129560	160233	359218	368547	706502	503299	2.8384e+06	2.46652e+06	2.35767e+06	2.82374e+06	1.13008e+06	1.38413e+06	1.70724e+06	1.43088e+06	2.21547e+06	2.93028e+06	2.03254e+06	2.8247e+06
UDP-N-acetyl-glucosamine	2.12253e+06	2.32949e+06	1.98566e+06	2.21239e+06	2.83482e+06	2.65304e+06	2.13182e+06	2.41284e+06	2.04549e+06	2.73924e+06	2.05162e+06	2.53971e+06	2.40946e+06	2.47697e+06	2.12073e+06	2.06543e+06	399719	412375	429330	469047	251648	218842	271431	213927	525918	1.15532e+06	526434	1.21476e+06	666259	708751	854502	1.08353e+06	1.07116e+06	764373	1.06796e+06	897088	1.04382e+06	1.14379e+06	944211	848574	2.2545e+06	2.12266e+06	2.70364e+06	2.6649e+06	2.4137e+06	2.18562e+06	2.45014e+06	2.56732e+06
UDP-nega	2.96509e+06	4.29805e+06	4.4617e+06	4.39821e+06	5.19231e+06	5.10485e+06	5.08531e+06	5.79876e+06	3.15167e+06	3.56069e+06	3.12039e+06	2.80918e+06	5.42078e+06	4.86558e+06	4.48119e+06	4.95988e+06	737445	1.14862e+06	848074	1.32217e+06	6.42286e+06	6.02166e+06	6.00601e+06	6.15532e+06	2.10158e+06	1.62136e+06	1.73052e+06	1.97323e+06	1.12692e+06	983691	1.16231e+06	1.11828e+06	1.18612e+06	1.93725e+06	1.90066e+06	2.11157e+06	3.68009e+06	4.53469e+06	3.96371e+06	3.70721e+06	4.64578e+06	3.9123e+06	3.72493e+06	4.8674e+06	5.31923e+06	5.97004e+06	5.57184e+06	4.77399e+06
UMP	126691	193546	186184	150056	204154	180917	153760	150179	128582	131187	120502	129998	223457	166037	180641	169016	33836.1	31077.2	24700.5	37054.1	265036	267715	228714	229838	164431	139248	230668	164647	193855	164526	175202	158109	103767	150791	135815	204122	176299	273120	202751	160882	214432	156710	171069	152718	180567	166267	168215	161894
uracil	439632	350091	432538	343898	208045	254529	252250	300291	53273	40687.4	50701.9	27768.6	81227.6	61831.2	39404.6	59592.6	1.19933e+06	1.25221e+06	1.19945e+06	1.21191e+06	1.70783e+06	2.04231e+06	1.71151e+06	1.67312e+06	1.10437e+06	1.21652e+06	1.13132e+06	1.08896e+06	1.20943e+06	1.22636e+06	1.14212e+06	1.43915e+06	1.25347e+06	1.07859e+06	1.17381e+06	1.11876e+06	1.36182e+06	1.38508e+06	1.30074e+06	1.29322e+06	1.0296e+06	1.10156e+06	1.0927e+06	999193	931067	1.07684e+06	903133	1.12547e+06
Urea	469378	379491	346543	361754	388431	395845	355813	430498	471809	427686	396885	483581	480099	558205	659217	482190	382228	414486	408534	568094	419093	511729	405430	322304	407809	462832	365320	334142	347090	483678	332199	376588	374127	466809	533930	346886	443912	346846	409069	454099	381138	399802	382477	318250	426535	422058	403505	501325
Uric acid	901481	1.15692e+06	1.00244e+06	1.08742e+06	1.20332e+06	1.05414e+06	1.06028e+06	1.22936e+06	664773	659223	487575	589970	517889	586502	601504	526180	891973	974708	892284	911106	814307	761472	817112	737776	837778	662843	542009	660756	958796	1.03532e+06	1.09419e+06	903433	1.01904e+06	1.04173e+06	1.03308e+06	813665	1.21867e+06	954205	893173	1.10149e+06	760699	790039	964914	1.19429e+06	772171	895632	792204	920885
uridine	133244	118574	163452	109820	164307	129394	161662	301655	41400.3	41916	95682.2	25207.1	34309.8	61357.4	38295.5	52984.3	27944.4	14516.3	20975.1	33839.5	105336	68376.7	105497	63082.1	79656.6	76051.3	62359	70960.8	99582.7	96907.2	128017	96232.1	83225.6	47351	80641.3	53523.6	63429.8	86305	67730.9	66674.1	45014.5	36143.8	42435.2	36631.4	50505.8	47160.7	44401.3	42866.1
UTP-nega	2.39499e+07	2.73025e+07	2.55584e+07	2.83557e+07	2.52488e+07	2.47876e+07	2.47042e+07	2.68969e+07	1.65977e+07	1.78385e+07	1.43239e+07	1.23241e+07	2.4453e+07	2.17082e+07	2.197e+07	2.5055e+07	5.72863e+06	6.22946e+06	5.9131e+06	8.25876e+06	1.98067e+07	1.94677e+07	2.27704e+07	2.00747e+07	9.51527e+06	1.17967e+07	9.5377e+06	1.45208e+07	6.91574e+06	7.46698e+06	6.55655e+06	7.50103e+06	7.41834e+06	7.72912e+06	1.17508e+07	1.06059e+07	2.22951e+07	1.9882e+07	2.29953e+07	1.93338e+07	2.64428e+07	2.51203e+07	2.40798e+07	2.45194e+07	2.70057e+07	2.95504e+07	2.79247e+07	2.57043e+07
valine	1.6166e+07	1.64508e+07	1.54262e+07	1.55968e+07	1.40187e+07	1.39323e+07	1.37251e+07	1.39704e+07	1.51516e+07	1.58267e+07	1.41741e+07	1.57569e+07	1.54084e+07	1.53731e+07	1.44225e+07	1.56451e+07	1.66697e+07	1.49963e+07	1.62537e+07	1.71059e+07	1.62822e+07	1.54146e+07	1.6466e+07	1.60327e+07	1.36204e+07	1.30271e+07	1.21513e+07	1.27448e+07	1.19944e+07	1.183e+07	1.05601e+07	1.30246e+07	1.41642e+07	1.29325e+07	1.34836e+07	1.36598e+07	1.24286e+07	1.16694e+07	1.21619e+07	1.26052e+07	1.19998e+07	1.22529e+07	1.21636e+07	1.15733e+07	1.0893e+07	1.15909e+07	1.13053e+07	1.19902e+07
xanthine	1.02705e+07	1.13252e+07	1.02544e+07	9.6608e+06	1.0891e+07	1.09571e+07	1.1461e+07	1.22788e+07	7.59796e+06	8.60221e+06	7.92269e+06	9.49287e+06	7.83201e+06	8.06765e+06	6.71197e+06	9.03519e+06	1.15993e+07	1.26748e+07	1.31109e+07	1.05705e+07	1.23609e+07	1.18495e+07	1.05443e+07	1.29274e+07	9.93043e+06	1.02401e+07	1.06721e+07	9.83463e+06	1.03399e+07	1.12473e+07	9.30546e+06	1.25258e+07	7.72219e+06	6.15235e+06	7.99899e+06	7.24692e+06	5.72315e+06	7.4539e+06	5.33697e+06	5.87664e+06	1.17581e+07	1.11519e+07	1.24068e+07	1.15545e+07	1.10637e+07	1.19565e+07	9.98478e+06	1.26694e+07
xanthosine	457701	557112	481620	412363	440267	402016	428334	583050	375953	391354	479323	521686	573111	526126	406629	422323	400418	365823	368281	438089	453478	519975	553628	513780	1.30338e+06	1.68866e+06	1.45184e+06	1.34668e+06	2.31225e+06	2.30467e+06	1.99922e+06	2.19771e+06	452884	446019	596578	456847	396029	399350	302910	374323	587753	545516	698823	742607	738810	678673	684338	673868
xanthosine-5-phosphate	3226.63	4837.91	4839.56	N/A	10207.7	12905.6	11271	13981.9	3224.77	8064.38	N/A	6454.6	10216.6	8603.17	7528.71	11289.5	7526.98	11292.6	8604.58	11828	27068.1	15614.8	24734.5	28463.2	22046.8	10753.6	5373.38	7527.35	15060.9	6452.89	17745.1	16670.7	13978.2	11293	11838.5	9131.54	19897.6	11292	20434.9	15609.6	10214.9	7507.33	4840.04	9681.11	5934.37	10216.6	7013.97	8603.1
Xanthurenic acid	1.41782e+06	1.59287e+06	1.3596e+06	1.42315e+06	1.17766e+06	1.21057e+06	1.24651e+06	1.11973e+06	1.02773e+06	1.08185e+06	1.02102e+06	1.07271e+06	921694	1.03452e+06	1.13757e+06	1.04172e+06	1.28175e+06	1.32307e+06	1.19789e+06	1.20516e+06	1.38286e+06	1.43017e+06	1.42257e+06	1.37709e+06	1.23464e+06	1.3973e+06	1.34403e+06	1.2428e+06	1.23725e+06	1.24005e+06	1.14725e+06	1.21817e+06	890835	984373	998256	950859	908829	886007	879527	866867	906194	979390	925828	974410	938545	968299	873428	964738

## Sheet: labeled parental
	12C Tu8902	Tu8902 U13C5-Gln #1	Tu8902 U13C5-Gln #2	Tu8902 U13C5-Gln #3	Tu8902 U13C6-Glc #1	Tu8902 U13C6-Glc #2	Tu8902 U13C6-Glc #3	12C Miapaca	Miapaca U13C5-Gln #1	Miapaca U13C5-Gln #2	Miapaca U13C5-Gln #3	Miapaca U13C6-Glc #1	Miapaca U13C6-Glc #2	Miapaca U13C6-Glc #3	12C BXPC3	BXPC3 U13C5-Gln #1	BXPC3 U13C5-Gln #2	BXPC3 U13C5-Gln #3	BXPC3 U13C6-Glc #1	BXPC3 U13C6-Glc #2	BXPC3 U13C6-Glc #3	12C HCT116	HCT116 U13C5-Gln #1	HCT116 U13C5-Gln #2	HCT116 U13C5-Gln #3	HCT116 U13C6-Glc #1	HCT116 U13C6-Glc #2	HCT116 U13C6-Glc #3	12C LOVO	LOVO U13C5-Gln #1	LOVO U13C5-Gln #2	LOVO U13C5-Gln #3	LOVO U13C6-Glc #1	LOVO U13C6-Glc #2	LOVO U13C6-Glc #3	12C HT29	HT29 U13C5-Gln #1	HT29 U13C5-Gln #2	HT29 U13C5-Gln #3	HT29 U13C6-Glc #1	HT29 U13C6-Glc #2	HT29 U13C6-Glc #3
1,3-diphosphoglycerate 13C(M+3)_nega	16202	10256.1	6801	14688.5	14283.8	32946.5	20367.9	19082.4	17197.2	18331.3	22476	62941.4	73793.5	35316.1	N/A	6528.12	8592.85	7131.74	19695	20107.4	17124	6119.49	14246.6	24243.8	19410.9	30936.6	50579.3	29435.9	26212	21849.1	9987.33	N/A	71902.3	83453.5	52395.7	17106.2	11323.2	10891.1	N/A	9948.66	30446.8	33300.4
1,3-diphosphoglycerate_nega	86739.9	89465.9	82898.5	102359	3.63435e+06	4.0559e+06	3.29246e+06	181696	158117	182325	165094	4.08777e+06	4.14183e+06	4.86544e+06	87308.4	94093	79838.5	96376.7	2.12869e+06	1.88845e+06	2.18617e+06	86581	130829	186860	141046	2.95671e+06	3.134e+06	3.12835e+06	166309	195279	204324	253463	2.80054e+06	3.06706e+06	2.74763e+06	94648.9	40942.4	72663	70437.9	792748	1.67504e+06	749746
2,3-Diphosphoglyceric acid_13C_nega	N/A	N/A	N/A	N/A	30171.9	35339.1	33204.4	N/A	3925.84	N/A	N/A	114378	116579	65609.5	N/A	N/A	N/A	N/A	24631.4	9979.43	18840.7	N/A	N/A	N/A	N/A	31407.2	33272.3	40608.1	N/A	3667.36	N/A	9280.25	96507.4	145757	92838.1	5715.62	N/A	7493.54	N/A	37949.6	47268.7	55947.7
2,3-Diphosphoglyceric acid_nega	19479.5	19370.7	23351.7	30119.1	19726.1	9419.02	9994.04	93916.4	60390.2	52324.7	46433.4	19372.7	16785.8	14120.2	N/A	19571.7	11899.9	20775.7	N/A	4347.65	N/A	34863.8	47112.4	71666	51646.1	N/A	10044.3	15395.9	74470.9	112317	113588	137648	7166.92	14414.8	9812.02	26835.8	N/A	30668.1	20326	N/A	N/A	5144.29
2-hydroxyglutarate_nega	4.36151e+06	1.1325e+06	1.54885e+06	1.17284e+06	4.39008e+06	4.19066e+06	3.38949e+06	7.00252e+06	1.71818e+06	1.88781e+06	1.56184e+06	6.36206e+06	6.22495e+06	6.48579e+06	3.90608e+06	4.07729e+06	3.70794e+06	3.55113e+06	3.46802e+06	3.26795e+06	3.93462e+06	6.38286e+06	1.85948e+06	2.03764e+06	2.14048e+06	4.8423e+06	5.02479e+06	5.1998e+06	6.53296e+06	6.10809e+06	6.2243e+06	7.52524e+06	6.77411e+06	6.57864e+06	5.83997e+06	5.81336e+06	2.80865e+06	2.89534e+06	2.93149e+06	4.40892e+06	4.42575e+06	4.20794e+06
2-hydroxyglutrate_13C(M+5)_nega	N/A	1.13477e+06	1.17667e+06	1.07016e+06	28722.7	23828.7	13382.3	N/A	1.54694e+06	1.53997e+06	1.32283e+06	47758.7	60160	39308.7	N/A	542322	476856	593389	63819.6	36611.7	88625.8	N/A	1.60071e+06	1.56341e+06	1.54195e+06	39472.6	41814.8	48533.3	12370.6	880152	912296	918603	95219.5	102043	114780	7393.46	1.33319e+06	1.57841e+06	1.45443e+06	72505.4	77882.7	69611.7
3-phosphoglycerate_13C_nega	N/A	N/A	9994.09	N/A	882844	779618	505558	19251.6	7857.08	15055	8925.93	1.54828e+06	2.01816e+06	1.25862e+06	8206.66	N/A	N/A	N/A	185456	251295	277585	N/A	N/A	5710.9	11803.8	716535	761572	837847	13364.4	25695.7	23895.9	18203.6	1.79368e+06	1.47778e+06	844738	8208.69	6778.97	6417.06	8576.61	1.28861e+06	917972	2.51718e+06
3-phosphoglycerate_nega	748544	760908	770121	749406	19257.6	24503.3	15892.6	1.4228e+06	1.06262e+06	1.48149e+06	870527	63576.1	56389.7	47874.3	194482	230271	197003	275172	20977.9	18244.3	14936.5	932707	825048	1.0932e+06	1.0446e+06	55362.2	63576.4	61965.3	1.13399e+06	2.67374e+06	2.82005e+06	2.43894e+06	189303	159985	158405	2.01769e+06	574185	1.93854e+06	1.34009e+06	29218.5	20939.6	35880.3
3-phosphohydroxypyruvate_13C_nega	14211	8041.13	10358.2	14990.9	N/A	N/A	N/A	22486.7	13920.3	23523.4	14289.4	6792.43	N/A	4639.99	4270.81	N/A	4629.83	N/A	N/A	N/A	N/A	16418.9	17509.5	16191.5	10319.5	8495.02	12127.5	7137.89	16403.5	30960.3	44258.8	31684.1	20674.7	18908.1	13195.3	25987.6	10881.2	32692.3	33908.4	N/A	N/A	N/A
3-phosphohydroxypyruvate_nega	13373.8	N/A	13767.3	N/A	10331.4	N/A	N/A	18130.3	26276.4	13021.3	24084.2	28930.5	35061	12947.1	N/A	4265.15	N/A	N/A	N/A	9667.99	N/A	31482.1	38726.6	21892.7	31646.8	24183.6	30112.3	18108.9	20371.2	18525.8	19548.6	23817.2	32364	17574.1	20731.8	N/A	N/A	7524.02	N/A	N/A	N/A	N/A
3-phospho-serine_13C_posi	N/A	N/A	N/A	N/A	N/A	N/A	N/A	N/A	N/A	N/A	N/A	N/A	N/A	4640.01	N/A	N/A	N/A	N/A	8928.74	N/A	N/A	N/A	N/A	N/A	N/A	30695.7	24244	37834.9	N/A	N/A	N/A	N/A	24260.9	64170	37682.8	N/A	N/A	N/A	3926.13	N/A	N/A	N/A
3-phospho-serine_posi	N/A	N/A	N/A	N/A	N/A	N/A	N/A	11915.7	9891.01	12645.8	14629.6	7518.43	11002.6	6787.33	30693.6	47683	39975	33586.6	33060.5	36171.4	33714.8	128264	134369	125096	156393	58125.1	89345.4	105662	203176	201301	147869	184625	161145	129820	133930	7012.49	N/A	N/A	13000.6	N/A	9966.65	10185.1
5-phosphoribosyl-1-pyrophosphate_13C_nega	7495.39	9264.87	11075.4	10064.7	86448.4	109417	85193.6	11441.9	14627.8	N/A	9999.13	177839	204950	147745	N/A	9610.52	9993.94	5706.95	53539.8	47871.9	72617.2	N/A	4956.7	11066.2	8918.71	67072.6	68071.5	72547.1	N/A	N/A	12843.2	9280.12	350161	150932	141745	10351.2	N/A	N/A	N/A	105479	155485	118654
5-phosphoribosyl-1-pyrophosphate_nega	78297.1	118508	118593	117251	25906.4	14129.8	6469.03	141205	134934	76859.9	120978	39259.7	33108.7	41588.2	39318.6	43338.9	45299.6	61680.4	14462.7	13928.1	23513.4	47099.5	63843	65436	57783.8	29845.6	21338.3	28897.1	143989	163044	129710	147126	41071.9	15695.3	11578.5	108835	30979.9	59590.7	40516.3	22899.1	11534.8	23020.6
6-phospho-D-gluconate_13C_nega	6794.26	N/A	N/A	N/A	104624	79798.6	80584.4	6447.35	6011.54	8910.05	N/A	46158.7	28732.4	43574.3	8567.14	8209.88	N/A	N/A	70087.1	177088	103134	21771.2	6647.15	10131.7	11050.9	37694	65360.5	43521.6	6664.11	5997.72	N/A	3576.87	28686.5	19655.3	11802.3	15274.2	N/A	N/A	7110.2	12115.7	45616.8	14911
6-phospho-D-gluconate_nega	89421.4	150359	101999	105913	346216	168704	141584	108291	114225	98067.5	54968.1	1.10312e+06	569135	497139	153873	182453	153025	77310.3	441478	398900	365948	69559.9	34573.6	33890.6	54211	724506	765037	953109	44260	23911.1	29682.7	15831.2	175648	230538	294455	14633.7	23942.1	47059.1	17132.2	241183	209212	116323
acetoacetyl-CoA_13Q_posi	N/A	N/A	N/A	N/A	N/A	N/A	N/A	N/A	N/A	N/A	N/A	N/A	N/A	N/A	N/A	N/A	N/A	N/A	N/A	N/A	N/A	N/A	N/A	N/A	4640.02	N/A	N/A	N/A	N/A	4996.95	N/A	9279.28	N/A	N/A	N/A	N/A	N/A	N/A	N/A	N/A	N/A	N/A
acetoacetyl-CoA_posi	N/A	N/A	N/A	N/A	N/A	N/A	N/A	N/A	N/A	N/A	N/A	N/A	N/A	N/A	6324.98	9280.19	8555.02	8209.62	N/A	N/A	N/A	N/A	N/A	8575.71	N/A	N/A	N/A	N/A	73889.9	44243.5	35692	36044.6	4283.12	7852.56	13550.3	245618	52827.8	8923.1	41403	9993.99	34622.6	22129.7
acetyl-CoA_13(M+2)_nega	N/A	N/A	N/A	N/A	N/A	N/A	N/A	N/A	N/A	N/A	N/A	N/A	N/A	N/A	N/A	N/A	N/A	N/A	N/A	N/A	N/A	N/A	N/A	N/A	N/A	N/A	N/A	N/A	N/A	N/A	N/A	N/A	N/A	N/A	N/A	N/A	N/A	N/A	N/A	N/A	N/A	4758.66
acetyl-CoA_13Q_posi	N/A	N/A	7495.29	N/A	N/A	N/A	4283.09	N/A	N/A	5710.84	N/A	N/A	3569.23	N/A	N/A	N/A	N/A	N/A	N/A	N/A	N/A	N/A	N/A	N/A	N/A	N/A	N/A	N/A	N/A	10708.1	13206.4	19987.7	6781.54	4283.21	4997.05	5710.89	N/A	8923.18	6067.82	7495.51	N/A	30696.4
acetyl-CoA_nega	N/A	N/A	N/A	N/A	N/A	N/A	N/A	N/A	N/A	N/A	N/A	N/A	N/A	N/A	N/A	N/A	N/A	N/A	N/A	N/A	N/A	N/A	N/A	N/A	N/A	N/A	N/A	N/A	N/A	N/A	N/A	N/A	N/A	N/A	N/A	N/A	N/A	N/A	N/A	N/A	N/A	N/A
acetyl-CoA_posi	8566.07	N/A	9988.32	9279.51	N/A	N/A	N/A	8922.99	8923.24	8922.84	3920.26	N/A	N/A	N/A	N/A	5711.03	8210.49	12849.7	N/A	N/A	N/A	18203.8	N/A	8566.26	17845.8	N/A	N/A	N/A	36766.2	35693.5	32124.4	59607	14277	N/A	4640.1	52660.3	N/A	30320.5	48189.6	3926.27	4640.12	14634.3
adenine_posi	6.86924e+06	6.55273e+06	7.48383e+06	7.43031e+06	7.15977e+06	7.27204e+06	6.46238e+06	9.74761e+06	9.66238e+06	1.01786e+07	9.75375e+06	9.65574e+06	9.46249e+06	9.74937e+06	6.69328e+06	6.74702e+06	5.18971e+06	6.70104e+06	4.78558e+06	5.41043e+06	6.01545e+06	1.0559e+07	9.26494e+06	8.37384e+06	9.34733e+06	9.47786e+06	8.80236e+06	8.20848e+06	7.1513e+06	6.82419e+06	7.73239e+06	5.90749e+06	5.99401e+06	6.7084e+06	5.21533e+06	6.32316e+06	5.37156e+06	5.55768e+06	5.29167e+06	5.235e+06	5.42e+06	5.14521e+06
a-ketoglutarate_13C(M+1_0)_nega	77389	5710.81	12817.5	12341.2	70729	48365.2	47357.4	96501.4	13571.3	7693.45	11472.7	82314.2	113904	105017	54225.5	9935.03	10908.8	N/A	40231.8	41352.4	41598.6	96361.1	22340.6	20043.5	36646	93711.2	83963.2	76433	104678	28204.3	32697.3	36301.5	102583	113222	76166	94687.9	11070	19506.5	11319.9	42307.1	68458.4	99343.4
a-ketoglutarate_13C(M+1_1)_nega	1.31792e+07	440062	615469	526163	1.20391e+07	1.16721e+07	1.05139e+07	1.98453e+07	1.06847e+06	957657	763656	1.96454e+07	1.92605e+07	1.85103e+07	1.4745e+07	1.18708e+06	1.24706e+06	1.14892e+06	9.2558e+06	1.08576e+07	1.31249e+07	1.96928e+07	651141	754737	853520	1.51891e+07	1.37122e+07	1.49395e+07	2.11843e+07	2.23032e+06	2.4062e+06	2.32961e+06	1.76947e+07	1.74475e+07	1.7329e+07	1.49262e+07	905214	885741	1.14358e+06	1.02005e+07	1.03019e+07	1.03759e+07
a-ketoglutarate_13C(M+2_1)_nega	161689	16177.1	23421.2	17110	339041	328131	283544	253387	29594.4	37227.5	24345.3	486255	687128	584834	160774	42111.1	35084.8	36590.3	216234	196069	329792	246326	27507.2	20519.6	25251.8	508609	585890	553626	307001	79940.8	63171.4	89462.1	823915	759491	722345	205604	34706.1	36087	56672.4	360732	653019	686949
a-ketoglutarate_13C(M+2_2)_nega	6.87151e+06	6.63079e+06	6.81296e+06	7.80395e+06	7.56825e+06	7.39759e+06	5.78527e+06	1.16688e+07	1.09716e+07	1.01798e+07	1.02681e+07	1.08944e+07	1.14023e+07	1.10733e+07	5.38588e+06	5.90855e+06	6.01838e+06	6.30013e+06	6.1742e+06	6.02912e+06	7.07468e+06	1.07895e+07	8.64991e+06	9.62946e+06	8.7825e+06	1.04581e+07	1.02042e+07	9.67735e+06	9.5535e+06	8.22463e+06	8.39476e+06	8.25465e+06	9.29655e+06	8.92678e+06	7.95425e+06	6.15174e+06	5.17562e+06	5.3515e+06	4.9881e+06	5.33538e+06	5.85116e+06	5.9419e+06
a-ketoglutarate_13C(M+3_2)_nega	20055.5	148005	174872	178059	1.71015e+06	1.80871e+06	1.41827e+06	138486	267008	304436	279825	2.55273e+06	2.67555e+06	2.93877e+06	82795.1	88956.3	87640.8	150366	3.03645e+06	2.43564e+06	2.84562e+06	128018	193728	269343	268060	2.73241e+06	2.33835e+06	2.78034e+06	105171	390158	331576	359220	4.11957e+06	3.77716e+06	3.50203e+06	83758	173239	99828.2	201756	2.17011e+06	2.32914e+06	2.14181e+06
a-ketoglutarate_13C(M+3_3)_nega	673298	1.05835e+06	598909	1.26522e+06	338483	397571	335891	1.06683e+06	1.84973e+06	1.7088e+06	1.60353e+06	1.82287e+06	1.69779e+06	1.88572e+06	456836	848214	841400	688254	599667	495286	591353	799860	1.67877e+06	1.89178e+06	1.83796e+06	641667	577253	644284	887815	2.4265e+06	1.53166e+06	2.61036e+06	1.03319e+06	925217	918364	640353	1.54033e+06	775570	1.72081e+06	504229	454485	445966
a-ketoglutarate_13C(M+4_3)_nega	N/A	241769	286417	247681	359932	347586	285341	9042.25	371409	394486	380191	419373	461221	472874	5742.4	355232	372461	370893	683329	527245	703738	18560.3	412912	475433	427481	711821	673706	572617	N/A	520165	548729	662459	1.3196e+06	1.23597e+06	1.31165e+06	11897.9	374535	343926	403137	515500	656934	613622
a-ketoglutarate_13C(M+4_4)_nega	38396.7	1.60919e+06	1.66922e+06	1.88827e+06	52313.3	58070.2	63539.7	13719.9	2.63799e+06	2.45644e+06	2.42509e+06	125610	161585	101632	9640.12	2.42778e+06	2.88529e+06	2.60885e+06	132893	95648.4	143853	64901.1	2.6713e+06	3.34182e+06	2.87941e+06	133257	141227	94640.5	45211.8	3.10188e+06	3.45848e+06	4.18488e+06	384879	420247	408987	26428.3	2.2261e+06	2.21239e+06	2.31412e+06	91435.2	128963	127529
a-ketoglutarate_13C(M+5_5)_nega	N/A	1.67188e+06	1.9289e+06	2.07546e+06	272358	313151	238200	N/A	2.90269e+06	3.3399e+06	2.02633e+06	463636	536358	488745	N/A	434700	571651	626936	692447	676954	731184	N/A	2.21255e+06	2.57165e+06	2.32121e+06	602470	589065	507783	N/A	1.98074e+06	1.97935e+06	2.22211e+06	1.52815e+06	1.62574e+06	1.40051e+06	3331.11	1.65854e+06	1.11028e+06	2.74491e+06	509619	710216	455445
a-ketoglutarate_nega	1.83031e+06	78666.2	123555	101753	1.40979e+06	1.33525e+06	1.02051e+06	2.5789e+06	87796.7	189399	107127	1.62659e+06	2.6219e+06	2.61663e+06	189987	45559.5	54322.7	76402.4	287766	225632	459117	2.42614e+06	204838	163842	262833	2.08945e+06	2.22767e+06	1.56162e+06	2.02453e+06	289385	246903	322038	3.0624e+06	2.0185e+06	1.93216e+06	3.11496e+06	192790	81095.6	240561	826012	2.43862e+06	2.65701e+06
alanine_13C(M+3)_posi	N/A	28076.4	32359.8	21885.8	601097	564413	554459	N/A	62326.4	69956.2	60755.5	588594	683061	545239	N/A	N/A	N/A	3810.32	255555	244927	222727	N/A	40958.8	37576.1	37116.8	847360	792313	747497	N/A	175745	168990	138390	3.84396e+06	3.82153e+06	3.83805e+06	N/A	131825	138896	149491	2.22227e+06	2.72674e+06	2.09028e+06
alanine_posi	841235	752354	693305	809349	301748	308106	262078	1.56448e+06	1.34574e+06	1.29119e+06	1.12516e+06	789918	941046	928510	777029	762832	752092	548369	541069	342602	435824	2.06337e+06	1.74292e+06	2.01104e+06	1.97486e+06	1.54512e+06	1.66357e+06	1.21328e+06	4.37748e+06	4.03825e+06	4.11237e+06	4.25522e+06	2.64097e+06	1.89025e+06	2.04968e+06	3.13505e+06	2.89e+06	3.89583e+06	3.05442e+06	1.15028e+06	1.43459e+06	952929
arginine	2.44566e+07	2.98236e+07	1.58859e+07	2.82699e+07	2.77772e+07	2.85622e+07	2.18752e+07	4.30433e+07	2.39669e+07	3.40187e+07	2.37865e+07	3.67945e+07	3.36033e+07	4.07165e+07	1.6075e+07	1.83504e+07	1.51357e+07	1.66255e+07	1.66785e+07	1.93596e+07	2.10511e+07	2.70595e+07	2.70138e+07	3.36437e+07	2.42273e+07	3.38026e+07	3.24564e+07	2.85704e+07	2.1191e+07	2.38399e+07	2.56698e+07	1.90583e+07	2.17441e+07	2.42919e+07	1.63055e+07	1.47356e+07	1.49298e+07	1.41766e+07	5.23872e+06	2.09597e+07	1.3897e+07	1.67356e+07
arginine_13C	N/A	N/A	N/A	N/A	N/A	N/A	N/A	N/A	N/A	N/A	N/A	N/A	N/A	N/A	N/A	N/A	N/A	N/A	N/A	N/A	N/A	N/A	N/A	N/A	N/A	N/A	N/A	N/A	N/A	N/A	N/A	N/A	N/A	N/A	N/A	N/A	N/A	N/A	N/A	N/A	N/A	N/A
asparagine_13C(M+4)_posi	N/A	103372	91514.3	101097	48068.5	48523.6	34754.6	N/A	81482.6	76138.9	105799	44255.6	41390.1	42356.6	N/A	289083	221111	279157	246040	210352	204555	N/A	184954	134939	145845	58765.4	51876.4	52413.4	6186.17	950015	845982	1.10035e+06	536817	506389	436556	N/A	320891	366378	431841	189928	303713	132647
asparagine_posi	31909	14838.4	6286.53	13327.5	43479.3	28344.4	35934.8	37278.5	31240.2	11489.7	18543.3	19046.3	31400.7	21270.4	127000	39907.3	31598.1	29933.7	85391.4	63345.6	64504.9	70343.8	16146.7	19595.9	14574.2	54608.2	46332.9	32100.1	270934	46130	25591.6	41147.5	209638	169801	160974	105351	16580.7	28904.5	21814.1	68573.1	68278.8	74185
aspartate_13C(M+1_0)_nega	124215	627893	645839	313013	213657	209320	141339	122789	512430	642330	446802	196388	206748	196568	365027	1.34815e+06	1.38755e+06	1.2561e+06	612352	603108	707148	180846	885024	831239	863716	376084	399201	427893	1.092e+06	1.9679e+06	1.89687e+06	1.95351e+06	1.38266e+06	1.43727e+06	1.35303e+06	446872	1.14962e+06	1.0172e+06	1.29328e+06	465622	712102	568594
aspartate_13C(M+1_0)_nega1	29021.8	21911.3	26275.3	26924.2	31213.3	24468.4	15942.4	29499.4	13324.9	26660.5	17621.4	22844.7	12345.8	23811.2	97326.6	193916	182234	146358	101391	72809.6	89112.7	30912.4	41486.3	39024.3	33018.6	33791	41893.2	39071.1	232712	287399	201471	299806	230296	259652	254239	58989.5	86331.5	117136	138538	74687.4	87323.5	82826.4
aspartate_13C(M+1_1)_nega	2.76154e+06	655025	846670	782931	3.63166e+06	2.99651e+06	2.22011e+06	1.8918e+06	844863	1.07614e+06	891487	2.34717e+06	2.61055e+06	2.84063e+06	3.53601e+06	3.29374e+06	3.58065e+06	3.26848e+06	3.83929e+06	3.97243e+06	4.55579e+06	2.85248e+06	1.14194e+06	1.03245e+06	1.2767e+06	3.264e+06	3.29367e+06	3.88915e+06	6.23504e+06	6.41639e+06	5.55339e+06	6.43199e+06	6.78402e+06	7.04712e+06	6.75256e+06	5.28822e+06	2.31209e+06	2.47168e+06	2.67373e+06	4.37243e+06	5.21654e+06	4.72682e+06
aspartate_13C(M+1_1)_nega1	20939	21368.3	19017.7	23391.2	46162	24271.4	29036.8	29029.1	19983.7	22841.9	19510.8	23319.3	21891.1	22805.9	77572.8	199860	187503	189885	107566	116126	121830	50441.9	33766.7	34758.4	41390.3	37591.2	33777.8	46632.9	298398	294550	232118	285378	236397	326246	238188	68054.2	99865.6	126202	93694.7	98038	83921.5	94129
aspartate_13C(M+2_0)_nega	12374.1	113262	87550	91851.9	63771.1	47110.6	78049.5	20449.2	79003.4	106138	108472	35212	38550	56159.9	22362.4	389697	391035	307414	341222	250067	418317	29984.6	117083	127546	99253.7	116119	113265	78519.9	49959.7	496316	460191	502082	486366	421656	300296	28073.3	216579	257941	318835	186079	293147	182264
aspartate_13C(M+2_1)_nega	32345.9	1.05135e+06	1.22689e+06	1.13567e+06	837365	714629	799428	30927	1.1108e+06	1.14024e+06	873864	397734	464419	509572	52825.3	3.65352e+06	4.29807e+06	3.6214e+06	3.99701e+06	3.24724e+06	3.93868e+06	29532.1	1.57825e+06	1.53585e+06	1.70561e+06	1.20319e+06	1.21357e+06	1.28128e+06	74217.8	6.64594e+06	6.46437e+06	6.73282e+06	4.80712e+06	4.54464e+06	5.24456e+06	92341.7	2.51215e+06	2.80735e+06	3.39529e+06	1.88359e+06	2.92386e+06	2.13717e+06
aspartate_13C(M+2_1)_nega1	N/A	10472.1	14770.3	8071.61	6177.37	4757.5	5709.24	N/A	10341.4	9973.46	9037.35	5661.04	N/A	N/A	N/A	24745.4	26632.5	19032.2	21317.2	19510.6	35675.3	N/A	22817.2	18546.4	17109.4	16615.7	8537.33	N/A	3806.31	145099	109281	132137	75083.7	89466.5	81751.8	N/A	36651.1	46157.5	56958.4	25447.6	38909.6	21874.6
aspartate_13C(M+2_2)_nega	139095	823338	987607	915020	1.16058e+06	1.00187e+06	810897	103761	1.05027e+06	1.10246e+06	1.04908e+06	1.66596e+06	1.84266e+06	1.90713e+06	262134	4.2134e+06	4.1867e+06	3.80078e+06	4.60693e+06	3.93048e+06	4.38689e+06	168263	1.51338e+06	1.45829e+06	1.63314e+06	2.37103e+06	2.38016e+06	2.32796e+06	602617	7.56688e+06	7.50551e+06	7.79271e+06	6.22504e+06	6.9611e+06	7.12626e+06	307415	2.74685e+06	3.00797e+06	3.71793e+06	2.3234e+06	3.69249e+06	2.46596e+06
aspartate_13C(M+2_2)_nega1	4706.66	75179.7	96040.7	98968.9	59293.5	59007.2	77150.4	N/A	28897.6	45308.2	62366.8	50600.4	35254.7	53743.2	18083.6	401690	382012	336976	317848	318035	375009	9058.94	101836	74086.9	68927.3	109399	79444.2	121250	44724.1	583624	522901	538629	388845	555161	362314	16183.7	222178	249110	227655	235500	307441	235623
aspartate_13C(M+3_1)_nega	N/A	67104.8	97083.3	59486.6	19035.6	41404.5	24748.5	N/A	45210.4	49948.8	40926	26164.3	30932.8	39026.4	N/A	201784	176559	147056	211356	175129	179372	N/A	84156.5	73732.1	78523.4	47605.9	43780.9	36170.1	N/A	717189	756411	649137	466728	485330	287413	N/A	160384	253653	206966	104695	175130	138485
aspartate_13C(M+3_2)_nega	N/A	988751	1.0678e+06	1.13084e+06	664514	525072	510185	N/A	696666	840895	664876	500138	521229	496689	8089.44	2.25037e+06	2.36738e+06	2.01627e+06	3.24532e+06	2.59684e+06	2.98608e+06	N/A	1.19043e+06	1.39373e+06	1.37884e+06	1.06008e+06	918673	895957	22843.3	8.50632e+06	7.7936e+06	8.79581e+06	5.28667e+06	5.69174e+06	5.4549e+06	8083.29	2.72945e+06	3.30264e+06	3.18697e+06	1.72246e+06	2.71557e+06	1.73703e+06
aspartate_13C(M+3_3)_nega	83422	1.24086e+06	1.33962e+06	1.44732e+06	568019	516894	461547	106430	2.84617e+06	3.31298e+06	2.91814e+06	1.13208e+06	1.16486e+06	1.16644e+06	54506.4	2.3188e+06	2.79908e+06	2.39538e+06	2.11519e+06	1.73935e+06	1.81767e+06	91023.2	2.5642e+06	2.08505e+06	2.36094e+06	955883	945845	984714	62493.4	9.41473e+06	8.83876e+06	9.69529e+06	3.92691e+06	4.10155e+06	4.06477e+06	124427	3.23403e+06	3.43135e+06	3.94925e+06	1.40234e+06	2.16747e+06	1.66521e+06
aspartate_13C(M+4_2)_nega	N/A	721010	696186	896641	13798.6	19999.9	19994.8	N/A	452111	472540	631062	25697	19512.2	12837.1	N/A	2.18198e+06	1.89728e+06	2.32144e+06	108982	78143.8	114220	N/A	1.03463e+06	835217	914096	23795.7	23319.4	15229.6	N/A	3.77109e+06	3.32689e+06	4.02059e+06	208868	221720	204162	N/A	1.42913e+06	2.01872e+06	1.64378e+06	73776	136584	57083.7
aspartate_13C(M+4_3)_nega	N/A	8.18323e+06	7.40465e+06	7.98551e+06	285442	229844	208344	N/A	5.58194e+06	5.72203e+06	4.99078e+06	258374	214322	226486	N/A	2.31147e+07	2.21757e+07	1.81233e+07	1.49057e+06	1.11487e+06	1.29013e+06	N/A	1.13067e+07	9.15161e+06	1.16862e+07	459717	371548	347608	N/A	3.92402e+07	3.60525e+07	4.06483e+07	2.47361e+06	2.65679e+06	2.60566e+06	N/A	1.68106e+07	1.75163e+07	1.65214e+07	747441	1.20336e+06	750554
aspartate_nega	1.00888e+07	1.19807e+06	1.29325e+06	1.35438e+06	9.39925e+06	9.03346e+06	8.27632e+06	7.70409e+06	2.19684e+06	2.2888e+06	1.99188e+06	1.07948e+07	1.12973e+07	1.29069e+07	2.7989e+07	6.01546e+06	6.63539e+06	6.20162e+06	2.21788e+07	2.17682e+07	2.11679e+07	1.50769e+07	2.19888e+06	1.93168e+06	2.33257e+06	1.45517e+07	1.4906e+07	1.63413e+07	5.89454e+07	1.31555e+07	1.15115e+07	1.34683e+07	4.68362e+07	4.93715e+07	4.69248e+07	3.08169e+07	4.21915e+06	5.09471e+06	5.39171e+06	1.71346e+07	1.99318e+07	1.9202e+07
aspartate_nega1	754712	108288	85964.3	90019.6	929036	702876	738756	832947	160024	160771	190358	581270	621707	543151	3.22053e+06	581650	470307	541880	2.52325e+06	2.25085e+06	1.95466e+06	1.20721e+06	138667	151476	167846	1.01375e+06	917158	962229	7.37412e+06	1.03943e+06	989980	1.3176e+06	5.56393e+06	7.06543e+06	5.84313e+06	3.62718e+06	326176	404771	476463	1.88611e+06	2.03807e+06	2.1378e+06
citrate _nega	8.54152e+06	980699	1.10229e+06	1.07662e+06	3.66542e+06	2.91997e+06	1.57855e+06	1.01951e+07	1.53395e+06	1.12299e+06	1.15898e+06	2.28104e+06	2.42185e+06	2.16821e+06	8.77529e+06	1.54437e+06	2.06014e+06	2.41931e+06	2.11127e+06	2.39398e+06	2.27336e+06	1.69014e+07	1.18968e+06	1.55884e+06	1.36434e+06	3.0065e+06	3.07943e+06	2.72011e+06	2.42455e+07	3.89678e+06	3.73364e+06	3.85909e+06	2.74292e+06	3.06882e+06	3.20553e+06	2.13212e+07	2.81297e+06	2.26095e+06	3.10337e+06	4.72501e+06	4.68511e+06	4.28002e+06
citrate_13C(M+1_0)_nega	344374	263948	295193	291880	730897	415803	221140	345276	194087	125593	165256	514728	420440	422312	344129	448251	516436	492425	525567	687132	737823	542760	413176	468948	387274	807825	805810	755507	808120	840477	1.40919e+06	1.34438e+06	744407	730660	809905	955698	679050	595218	762943	710373	824746	854894
citrate_13C(M+1_1)_nega	327450	376502	393866	484022	446638	393463	170104	340643	283255	283530	274556	372187	324382	310602	360066	797711	807250	908119	493410	408058	551922	555801	599376	666307	503999	491641	523483	534748	780968	1.43118e+06	1.60222e+06	1.90728e+06	707860	623817	637020	964565	1.05225e+06	943245	1.02099e+06	635492	748667	714609
citrate_13C(M+2_0)_nega	116545	974569	893149	1.06122e+06	4.18328e+06	3.08794e+06	2.44067e+06	187452	703422	682692	537798	2.83564e+06	2.96202e+06	3.16253e+06	119839	1.48695e+06	1.46756e+06	1.76556e+06	5.01724e+06	4.78572e+06	6.69325e+06	206787	1.50225e+06	1.39116e+06	1.37223e+06	8.05471e+06	5.69923e+06	7.8043e+06	284334	2.40062e+06	2.462e+06	2.49526e+06	4.99272e+06	5.40499e+06	5.59491e+06	322166	1.72343e+06	1.53555e+06	1.9029e+06	5.86402e+06	5.03773e+06	6.15106e+06
citrate_13C(M+2_1)_nega	8088.84	469688	33192.7	427206	4.45657e+06	2.70933e+06	1.575e+06	21070	452099	433169	334298	2.39813e+06	2.96252e+06	2.59938e+06	22843	724986	671078	696092	5.21528e+06	5.59903e+06	5.8385e+06	21403.4	732189	843483	925671	6.57108e+06	5.09214e+06	7.11173e+06	50086.2	1.07675e+06	1.3284e+06	1.30996e+06	5.41535e+06	4.73453e+06	5.15951e+06	81221	955431	897882	980516	4.72057e+06	5.37931e+06	6.48834e+06
citrate_13C(M+2_2)_nega	72764	987927	749443	928332	295606	166578	125905	113857	709003	520786	540722	143241	165275	164237	66326.6	1.20086e+06	1.25862e+06	1.54464e+06	339499	266318	300667	124620	1.50012e+06	1.43615e+06	1.35431e+06	333523	309078	340996	143088	1.93562e+06	1.96673e+06	1.67861e+06	508007	475964	628533	195973	1.50005e+06	1.2424e+06	1.83071e+06	380526	394864	351547
citrate_13C(M+3_0)_nega	10468.6	697881	649091	881314	463279	320707	237116	18083.6	561162	706580	565457	258357	358061	309652	14275.3	741922	818860	915301	662948	678758	790842	17127.4	957602	931889	957701	694585	689709	678958	18561.7	1.17994e+06	1.34634e+06	1.33098e+06	1.01522e+06	904086	1.19642e+06	22359.8	1.31481e+06	1.06513e+06	1.30561e+06	791653	947753	686206
citrate_13C(M+3_1)_nega	3328.81	1.05667e+06	904842	1.27807e+06	448766	308375	227986	20432.5	824499	952978	660668	270834	349237	399057	N/A	950853	1.11193e+06	1.08829e+06	661917	651939	955624	16167.1	1.23742e+06	1.36374e+06	1.33311e+06	919437	711418	733550	36551.5	1.65179e+06	1.7852e+06	1.43941e+06	1.02071e+06	1.22034e+06	1.19505e+06	14294.1	1.78159e+06	1.69075e+06	1.66034e+06	1.0618e+06	951074	904730
citrate_13C(M+3_2)_nega	N/A	886044	948016	1.18522e+06	260267	186078	139434	10922.3	750838	853130	774253	172100	236559	227841	27126.4	987600	1.11102e+06	1.00074e+06	387218	292531	486166	11882.4	1.17762e+06	1.3082e+06	1.23928e+06	436554	509657	317120	23380.6	1.62743e+06	1.52795e+06	1.35131e+06	770687	697081	781894	31885	1.51321e+06	1.74268e+06	1.72958e+06	650647	512348	409496
citrate_13C(M+3_3)_nega	N/A	351153	371858	541567	41820.1	28552.6	18558	N/A	323301	409251	322417	45687.9	48040.9	66562.2	N/A	409717	369879	433648	63281.2	59009	109441	8566.3	617316	541755	490440	93495.7	77571	72812.2	9043.11	487563	647919	671674	144481	175167	188064	7621.58	750181	771073	758334	127565	111159	90837.5
citrate_13C(M+4_1)_nega	N/A	4.23807e+06	4.05542e+06	4.28596e+06	1.39996e+06	1.02062e+06	661143	35715.9	3.65216e+06	4.21731e+06	3.12688e+06	879734	1.01239e+06	1.03217e+06	9516.78	3.92402e+06	4.27214e+06	4.95768e+06	2.9141e+06	1.87427e+06	3.37429e+06	9027.1	6.37553e+06	7.83998e+06	5.12867e+06	2.40831e+06	2.41001e+06	2.53384e+06	16658.6	5.98868e+06	6.29709e+06	5.76303e+06	3.14773e+06	3.54155e+06	3.80606e+06	32202.9	4.75204e+06	5.77742e+06	6.35268e+06	2.49979e+06	2.89585e+06	2.47659e+06
citrate_13C(M+4_2)_nega	258403	3.81116e+06	3.0394e+06	3.7978e+06	565761	491370	319575	249216	3.26455e+06	3.26346e+06	2.70849e+06	436567	400250	446757	549709	3.77407e+06	4.48437e+06	4.44194e+06	1.04572e+06	742713	1.23805e+06	124260	5.68037e+06	5.25559e+06	5.41375e+06	1.01808e+06	889063	896445	151042	4.0296e+06	4.53966e+06	4.98985e+06	1.16014e+06	1.4845e+06	1.54087e+06	1.06324e+06	5.78161e+06	4.96987e+06	5.58807e+06	1.07331e+06	1.27758e+06	963445
citrate_13C(M+4_3)_nega	N/A	2.9823e+06	3.11911e+06	3.76074e+06	450795	313372	153252	23321.9	2.50554e+06	2.86256e+06	2.47725e+06	254833	285391	291419	N/A	3.41788e+06	3.49688e+06	3.67844e+06	778263	512986	1.02985e+06	N/A	5.48743e+06	7.3516e+06	5.29712e+06	877264	808872	724089	N/A	4.23841e+06	4.47243e+06	4.84155e+06	937186	1.25786e+06	1.28452e+06	6162.73	4.59666e+06	3.88847e+06	3.88703e+06	728885	988773	739171
citrate_13C(M+5_2)_nega	8566.87	1.44921e+06	2.3038e+06	2.04028e+06	622729	404118	329118	8083.15	1.71005e+06	1.32293e+06	1.48355e+06	592569	802706	640309	27127.5	653493	956084	957992	1.17424e+06	982386	1.6204e+06	N/A	1.96905e+06	2.0468e+06	2.12146e+06	1.18216e+06	1.00341e+06	849441	18087.5	1.34324e+06	1.52079e+06	1.7273e+06	2.60975e+06	2.71294e+06	2.44124e+06	59487.3	2.89697e+06	2.25898e+06	3.20562e+06	1.14063e+06	1.87272e+06	1.34754e+06
citrate_13C(M+5_3)_nega	11898.7	204377	274936	331282	284487	182231	161048	16280.6	225076	245416	212470	330715	343305	459021	16662.3	166611	224721	206537	682923	683391	920626	N/A	347634	474809	334930	555597	505186	419205	9992.64	317545	368627	385142	1.441e+06	1.46416e+06	1.2351e+06	34170.7	444396	394979	441732	804144	1.13389e+06	822260
citrate_13C(M+6_3)_nega	N/A	543878	402963	572974	115148	89906.5	77118.3	N/A	665445	442666	479931	157528	138002	185527	N/A	143724	148960	162533	387585	260955	479176	N/A	481313	617264	712301	527787	407448	216055	N/A	546615	625333	568645	995575	1.47842e+06	1.02632e+06	N/A	618392	598191	731267	374244	670077	403160
citrate_isocitrate_13C(M+1_0)_nega	209352	129566	119134	190073	194881	148991	94696.3	198160	121129	75377.4	120446	136778	176632	188950	251295	277057	272153	267148	149444	139642	173596	428997	113379	199397	192612	260795	256638	245365	541498	644523	509277	603093	294649	244004	277863	579361	291593	273656	293219	297309	298641	282411
citrate_isocitrate_13C(M+1_1)_nega	1.2735e+06	1.60193e+06	1.28239e+06	1.7643e+06	1.01277e+06	813154	579260	1.24818e+06	1.24938e+06	884001	1.07768e+06	735135	881409	1.03902e+06	1.10321e+06	2.06647e+06	2.52291e+06	2.73837e+06	1.03817e+06	1.03138e+06	1.30736e+06	2.66754e+06	1.85783e+06	2.2222e+06	2.04895e+06	1.86462e+06	1.4735e+06	1.4249e+06	3.19798e+06	5.73576e+06	5.5695e+06	4.73282e+06	1.88214e+06	1.37994e+06	1.77331e+06	2.75567e+06	3.22245e+06	2.93277e+06	2.81706e+06	1.8276e+06	1.73582e+06	1.6857e+06
citrate_isocitrate_13C(M+2_1)_nega	19034.4	511765	578224	905859	6.74607e+06	4.45789e+06	3.09556e+06	82723.7	533519	631520	514191	4.48162e+06	5.4088e+06	5.25061e+06	25223.7	1.13072e+06	997550	1.5989e+06	1.03897e+07	8.35046e+06	1.14544e+07	55885.6	1.18783e+06	1.13356e+06	1.14059e+06	9.1517e+06	9.50892e+06	9.88305e+06	92134.1	2.2669e+06	2.01443e+06	1.84957e+06	9.232e+06	8.64756e+06	9.41077e+06	131937	1.79424e+06	1.27307e+06	1.28476e+06	1.03108e+07	9.89548e+06	8.29033e+06
citrate_isocitrate_13C(M+2_2)_nega	179906	2.02807e+06	1.85069e+06	2.99772e+06	6.9146e+06	4.24751e+06	3.07247e+06	324191	1.95132e+06	1.80773e+06	1.45703e+06	4.00835e+06	4.79163e+06	4.83093e+06	190772	3.12611e+06	3.92572e+06	4.29712e+06	1.07192e+07	8.35072e+06	9.59755e+06	389990	3.67143e+06	4.25173e+06	3.85009e+06	1.09977e+07	1.00171e+07	1.11213e+07	472481	6.48388e+06	6.29242e+06	6.36294e+06	9.38985e+06	8.73183e+06	1.00417e+07	475807	5.03608e+06	4.63792e+06	4.37474e+06	8.73812e+06	9.1662e+06	8.74061e+06
citrate_isocitrate_13C(M+3_2)_nega	N/A	1.00118e+06	920128	1.21737e+06	635765	594654	319505	12355.5	955520	800919	1.013e+06	539679	541344	582388	8082.65	1.00365e+06	1.01296e+06	1.03463e+06	1.28741e+06	768420	1.35811e+06	N/A	1.07501e+06	1.66949e+06	1.14191e+06	1.0392e+06	1.2196e+06	964972	10904.7	1.77427e+06	1.78716e+06	1.86605e+06	1.56356e+06	1.76418e+06	1.94903e+06	9956.29	1.8025e+06	1.6459e+06	1.86918e+06	1.3708e+06	1.52801e+06	1.54891e+06
citrate_isocitrate_13C(M+3_3)_nega	5235.37	1.85049e+06	1.69e+06	2.07556e+06	705082	498169	307718	21896.2	1.88465e+06	1.99364e+06	1.81375e+06	530236	611133	646396	14282.7	1.69563e+06	1.99514e+06	2.15285e+06	1.30066e+06	769463	1.22564e+06	20440.7	2.93911e+06	3.55607e+06	2.35024e+06	929460	1.12117e+06	1.09007e+06	30968.3	3.67579e+06	3.59245e+06	3.6196e+06	1.56625e+06	1.91807e+06	2.10312e+06	33852.9	3.47076e+06	3.56138e+06	4.32725e+06	1.34498e+06	1.4662e+06	1.51251e+06
citrate_isocitrate_13C(M+4_3)_nega	N/A	5.01695e+06	5.01855e+06	6.32263e+06	1.99968e+06	1.56111e+06	1.07298e+06	21892.9	5.06386e+06	3.79918e+06	4.62066e+06	1.37609e+06	1.82447e+06	1.62341e+06	9029.14	4.77926e+06	5.65915e+06	6.26273e+06	4.65657e+06	3.17942e+06	4.95779e+06	11923	8.65905e+06	1.01983e+07	1.00687e+07	3.75531e+06	3.38149e+06	3.57599e+06	27612.7	6.93192e+06	8.56903e+06	7.77301e+06	5.45517e+06	6.28919e+06	5.41996e+06	43050.1	8.26181e+06	7.43224e+06	8.0842e+06	3.8492e+06	5.12124e+06	3.94479e+06
citrate_isocitrate_13C(M+4_4)_nega	N/A	5.39778e+06	6.06447e+06	6.06847e+06	1.45008e+06	1.15981e+06	727422	31874.1	5.04837e+06	4.06033e+06	5.24109e+06	910972	1.01431e+06	843394	12814.8	4.54248e+06	6.48382e+06	6.16791e+06	1.90447e+06	1.83271e+06	2.24969e+06	12866.9	9.05069e+06	9.84284e+06	8.55417e+06	2.2811e+06	2.11279e+06	1.97626e+06	7820.73	7.01854e+06	7.29412e+06	7.36255e+06	3.49093e+06	3.33483e+06	3.14483e+06	20746.2	8.32618e+06	6.55734e+06	8.76384e+06	2.23084e+06	2.40868e+06	2.0744e+06
citrate_isocitrate_13C(M+5_4)_nega	N/A	2.93905e+06	3.61273e+06	5.17615e+06	862200	527540	436767	12869.7	2.7753e+06	1.92231e+06	3.35927e+06	1.06884e+06	927648	1.136e+06	3808.62	1.59769e+06	1.94398e+06	1.59069e+06	2.5203e+06	1.82629e+06	3.08529e+06	N/A	3.12129e+06	3.63453e+06	3.42226e+06	2.13585e+06	1.93314e+06	1.53297e+06	12057.9	2.94639e+06	2.58333e+06	3.30301e+06	4.60868e+06	5.2283e+06	3.64057e+06	24758.8	4.36745e+06	3.9714e+06	4.83765e+06	2.24623e+06	2.59661e+06	2.47821e+06
citrate_isocitrate_13C(M+5_5)_nega	N/A	188984	149622	220753	224315	162688	108948	N/A	221393	165242	205667	342524	273946	349920	N/A	111886	152747	117073	504159	407883	592690	N/A	233119	242964	243090	442426	441804	328731	N/A	237627	334035	239469	1.18403e+06	1.21156e+06	823371	N/A	248756	269416	321729	560141	673767	675594
citrate_isocitrate_13C(M+6_6)_nega	8089.32	832206	755213	1.23247e+06	201450	226520	110771	11897.2	938431	835699	689430	301641	248831	318582	6186.15	206476	244179	233790	675762	463569	855427	N/A	1.12491e+06	1.22973e+06	1.31169e+06	732516	799844	315422	9510.95	938288	885060	928523	1.76716e+06	2.39768e+06	1.88301e+06	8089.67	1.05657e+06	968885	1.03742e+06	789575	1.09905e+06	700105
citrate_isocitrate_nega	1.67788e+07	2.28609e+06	1.9233e+06	2.52364e+06	6.93728e+06	4.803e+06	2.94475e+06	1.87307e+07	2.1067e+06	2.02532e+06	1.91017e+06	4.708e+06	4.22826e+06	4.46531e+06	1.71953e+07	3.24033e+06	4.15935e+06	3.8781e+06	3.53557e+06	4.63881e+06	4.19632e+06	2.98741e+07	2.62849e+06	2.91345e+06	2.7168e+06	5.2019e+06	5.64886e+06	5.4457e+06	3.80307e+07	5.59968e+06	7.56355e+06	7.48051e+06	5.81035e+06	4.88316e+06	6.65627e+06	4.12973e+07	4.61535e+06	4.4297e+06	4.42651e+06	8.3074e+06	8.31631e+06	7.80265e+06
citrulline_13C(M+5)_posi	85721.6	55490.7	92829.6	64665.7	72067.2	94674	79812.1	59434.5	80457.1	58258.6	104635	106714	91724.4	76238	67085.2	80369.7	94897.2	124215	118871	93395	120347	101898	100732	126068	118648	144522	203740	208644	168902	138984	98898.1	149813	240341	195490	229191	169534	90293.2	134864	135177	187725	360976	208428
citrulline_posi	533366	464339	594247	384786	591353	457375	460991	757789	747947	1.00867e+06	678397	805211	738981	750781	193677	351029	304719	327232	272349	297261	212993	683708	531541	521375	325035	611565	610727	405426	453213	348668	470359	224219	403057	458152	527442	223783	267586	150367	299004	269545	175524	192833
deoxyribose-phosphate_13C_nega	N/A	N/A	N/A	N/A	150555	N/A	57328.9	210500	N/A	N/A	N/A	N/A	226326	N/A	N/A	N/A	N/A	N/A	56501.2	139203	157505	118750	127052	170915	N/A	322052	114167	218325	N/A	N/A	N/A	N/A	N/A	185293	73934.4	135934	N/A	N/A	N/A	239247	305833	351501
deoxyribose-phosphate_nega	59946.6	120883	112493	94377	83508.9	22519.5	26122.3	225503	118772	133230	75093.5	142516	145470	36684.4	59753.4	81212.9	113214	87301.9	16377.9	44049.7	17607	187121	176329	221261	191432	92672	108391	104549	116794	153771	182788	99339.3	37284.8	48535.7	49396.7	319011	208747	302796	321173	30404.6	42845.7	43365.2
D-glucono-?-lactone-6-phosphate_13C_nega	N/A	5951.94	5224.79	12153.7	80666.2	92445.2	62821.8	N/A	N/A	N/A	N/A	N/A	84235.4	75611.4	16060.2	22843.5	12848.8	14840.5	52496.7	59518.4	62781.7	50327.2	39261	7937.22	N/A	N/A	29898.6	28520.4	13021.2	N/A	N/A	9293.97	100923	36054.3	40770.8	23913	7314.96	8040.49	N/A	13749.8	22410.1	11917.8
D-glucono-?-lactone-6-phosphate_nega	26335.6	31769.5	51808.7	44255	N/A	N/A	5335.61	29275.7	24671	24338.8	22892.2	13563.2	7216.81	5077	35654.4	54230.8	49201.9	38574.7	N/A	N/A	8547.39	12759.8	13202.8	22859	16687	14348.8	7306.25	11012.8	12346.4	14271.9	26775.5	8558.29	6043.29	9004.23	N/A	6951.35	16410.3	36406.2	18771.4	11065.5	N/A	5712.74
D-glucosamine-1-phosphate_13C_posi	8539.87	6403.05	N/A	N/A	N/A	N/A	N/A	N/A	7811	5639.31	N/A	N/A	N/A	N/A	12849.5	13206.4	8960.63	6079.11	N/A	4988.69	N/A	8926.23	7853.07	8069.9	11778.6	N/A	5365.39	N/A	47578.9	35060.8	16489.4	39388.2	14858.7	18194.2	12176.7	22456.4	24546.2	24157.2	19275.1	4993.43	10708.5	18203.4
D-glucosamine-1-phosphate_posi	N/A	N/A	3902.91	N/A	N/A	N/A	N/A	N/A	N/A	N/A	N/A	N/A	N/A	N/A	N/A	4493.75	N/A	N/A	N/A	N/A	N/A	4997.05	N/A	N/A	N/A	N/A	N/A	N/A	N/A	N/A	N/A	N/A	N/A	N/A	N/A	N/A	N/A	N/A	N/A	N/A	N/A	N/A
D-glucosamine-6-phosphate _13C_posi	11778.7	47472.7	52107.6	58532.4	27840.4	35322.8	21413.1	18207.4	125998	108845	172544	25246	20795.6	24984.8	18203.4	31053.2	35722.5	26770.1	23200.2	24086	24981.1	12492.8	98148.4	120287	108508	28072.8	18175.4	19988	23200.5	49256.4	41403.4	54251.5	24271.2	22836.8	26411	15705.5	41041.9	60680.1	27127.2	13917.9	13563.4	22124.6
D-glucosamine-6-phosphate_posi	N/A	12074.7	10997.8	15354.3	N/A	N/A	N/A	7400.04	9177.69	8206.54	8924.19	N/A	N/A	N/A	N/A	9993.44	12489.8	N/A	N/A	N/A	N/A	7493.67	13208.2	8923.2	18917	N/A	N/A	N/A	13161.9	22136	13206.2	18563.6	N/A	N/A	N/A	N/A	14277.2	7852.34	14277.3	N/A	N/A	N/A
dihydroxy-acetone-phosphate_13C_nega	80436.4	59825.2	54667.8	62506.8	2.69754e+06	3.45548e+06	3.47715e+06	401058	410769	363558	237818	6.52012e+06	8.37593e+06	7.21118e+06	84004.4	83099.8	86568	72113.6	3.17188e+06	2.58247e+06	3.38291e+06	100472	102673	172948	273171	3.10237e+06	2.64896e+06	2.80145e+06	103610	132159	240746	178701	1.57423e+06	7.16878e+06	6.20503e+06	170794	188331	155670	162304	4.74056e+06	7.8204e+06	2.53239e+06
dihydroxy-acetone-phosphate_nega	3.46499e+06	3.22176e+06	4.35246e+06	3.40745e+06	104839	74895.8	64504.5	7.0283e+06	7.43819e+06	9.19061e+06	7.96126e+06	183333	312070	223385	2.68318e+06	2.4064e+06	2.53786e+06	4.76249e+06	83760.6	84169.7	83764.7	1.87714e+06	5.95519e+06	4.98896e+06	7.3124e+06	103686	86465.5	95855.1	5.00213e+06	6.15769e+06	4.63977e+06	6.74217e+06	237435	239224	207031	3.96289e+06	4.49638e+06	4.07575e+06	5.1557e+06	217257	168412	311045
erythrose-4-phosphate_13C_nega	9218.81	25716.6	N/A	36658.9	242920	212812	182381	N/A	11505.4	39553.3	46247.4	223141	246510	285959	8929.38	12062.8	10684.2	8967.81	149380	104105	161233	19930.8	29411.4	8295.78	24729.9	182175	171432	170172	13917.5	25111.5	7065.06	11267.4	203225	155375	128233	8913.23	N/A	7323.44	11656.4	100643	116155	138125
erythrose-4-phosphate_nega	198731	236482	245200	252681	20402.5	21706.1	19483.1	235485	278229	241970	290008	43663.9	38091	38565.5	159155	187570	177557	101341	19087.4	11243.2	12886.1	267954	110382	149332	284688	25171.3	17046.5	19873.4	251088	246319	203848	240050	37772.8	54547.5	35083.9	87113	107049	110645	82221.3	27347	35480.7	31489.8
fructose-1,6-bisphosphate _13C_nega	51677.8	26910.3	14840.5	27324.4	6.73999e+06	6.49733e+06	5.30225e+06	170528	78011.5	73804.3	59536.7	5.90079e+06	7.54465e+06	6.19887e+06	71777.6	51664.9	28887.1	44641.8	1.6205e+06	2.35149e+06	1.53372e+06	82741.3	43862.8	47156.4	37830.1	3.8241e+06	3.40029e+06	6.082e+06	91049.9	60456.5	72744.7	66803.7	680746	5.57266e+06	5.4436e+06	84146.9	43469.3	41040.7	25623.5	792155	5.3586e+06	578875
fructose-1,6-bisphosphate_nega	3.48889e+06	4.7187e+06	5.39899e+06	4.75604e+06	204248	109823	111711	6.22569e+06	5.62574e+06	7.47832e+06	6.45319e+06	196504	133929	66050.8	1.32463e+06	1.30172e+06	1.3872e+06	1.11534e+06	66124.7	58886.5	82681.8	3.36577e+06	2.90988e+06	2.52716e+06	4.2397e+06	121032	135659	105017	3.77426e+06	4.20276e+06	2.36374e+06	4.32593e+06	149305	105265	99541.2	893541	992950	615864	1.60256e+06	136518	127822	35411.4
fructose-6-phosphate_13C_nega	80183.5	43503.3	55410.8	86084.9	4.32863e+06	3.84961e+06	3.57968e+06	123583	77063.3	121006	48831.8	5.42599e+06	5.02245e+06	5.65965e+06	85363.9	41155.4	74964.7	19307	2.62898e+06	2.18546e+06	2.39334e+06	50703.9	115193	122320	107238	3.20536e+06	3.04887e+06	2.93381e+06	49233.3	110373	50773.3	45429.7	3.04589e+06	3.01602e+06	3.36857e+06	108081	25720	27305.4	29649.1	691241	1.85826e+06	748883
fructose-6-phosphate_nega	2.81623e+06	3.7565e+06	4.50784e+06	4.24579e+06	193572	144300	121698	5.04801e+06	4.51601e+06	4.44553e+06	4.2833e+06	180814	132967	149940	1.60164e+06	2.1817e+06	2.31594e+06	1.28487e+06	154735	103074	155804	3.07441e+06	2.28284e+06	2.35676e+06	4.06848e+06	180590	172257	165005	3.79858e+06	2.67179e+06	2.86178e+06	2.72035e+06	303530	243711	197947	1.07587e+06	981103	796188	846709	167937	134612	131476
fumarate_13C(M+1_0)_nega	81540	63545.6	100646	131398	376902	243096	163060	67625.9	155323	137614	117029	205458	172328	243824	96455.4	202596	192878	198848	246381	272174	336248	97954.4	149349	164523	130167	369413	330524	334053	122230	250441	289419	289516	784880	700930	614504	146415	253466	204191	246079	539046	373558	351268
fumarate_13C(M+1_1)_nega	266432	380515	436365	263006	472769	421541	290564	392803	306318	500046	470076	538642	463330	506916	227376	842609	815394	736596	531460	504057	529309	278842	410838	396326	430370	590917	615977	428819	381392	1.07473e+06	1.17822e+06	917621	961443	942775	654803	478429	734715	682404	860553	707860	648977	730359
fumarate_13C(M+2_1)_nega	9797.73	435453	530346	477444	501231	518195	300224	5063.86	353938	391128	351414	289061	330174	387189	N/A	883142	958118	879566	966411	889187	1.10462e+06	N/A	558163	569348	501911	460891	625764	575854	9257.77	694079	772349	886025	720605	651751	622177	10452.8	983435	887706	1.01308e+06	854999	1.01377e+06	777945
fumarate_13C(M+3_2)_nega	108567	690377	717932	733756	373918	373796	319408	17769	649318	714859	720135	319351	319871	363605	5601.52	544724	534748	598895	822060	609918	859382	24885.4	683703	665722	634627	404609	418198	375002	30015.9	1.02589e+06	1.13104e+06	1.23355e+06	869849	716033	711038	37104.9	1.26008e+06	1.14825e+06	1.45007e+06	736097	888125	664830
fumarate_13C(M+3_3)_nega	308893	1.26468e+06	1.50814e+06	1.68491e+06	620772	530795	417843	N/A	1.24609e+06	1.28027e+06	1.29914e+06	1.81742e+06	1.90035e+06	1.89278e+06	39829	1.28957e+06	1.3967e+06	1.24649e+06	434420	405560	519545	126017	1.17737e+06	1.2162e+06	1.30575e+06	N/A	N/A	N/A	70336.6	1.83106e+06	1.91564e+06	2.13003e+06	667703	521252	490978	141788	1.85691e+06	1.81827e+06	1.99687e+06	639909	629747	526186
fumarate_13C(M+4_3)_nega	N/A	5.65422e+06	6.53163e+06	6.87609e+06	665707	543199	535094	8136.99	4.24604e+06	4.7611e+06	4.53794e+06	164101	153156	154296	5698.36	6.09759e+06	5.66027e+06	5.81739e+06	430941	304789	443504	N/A	5.45421e+06	5.45827e+06	5.42024e+06	294448	303610	215735	N/A	5.34338e+06	5.80737e+06	6.46777e+06	536743	439171	395492	9727.24	7.61484e+06	7.36222e+06	7.49856e+06	547296	580965	427796
fumarate_nega	6.65548e+06	717593	676970	621891	6.80859e+06	6.01356e+06	5.24731e+06	5.01367e+06	1.22146e+06	1.40174e+06	1.41259e+06	4.7907e+06	4.50478e+06	4.898e+06	6.7535e+06	1.58901e+06	1.42232e+06	1.40972e+06	7.06466e+06	6.18982e+06	7.50489e+06	6.98929e+06	977435	907044	994175	5.78156e+06	5.85896e+06	5.93719e+06	1.00407e+07	1.76692e+06	1.6554e+06	1.87888e+06	7.91684e+06	7.33465e+06	6.83163e+06	1.3013e+07	1.91702e+06	1.67712e+06	1.94459e+06	7.82799e+06	7.962e+06	7.67551e+06
Geranyl-PP_13C(M+10)_nega	151427	88972.8	73748.9	74698.4	90684.1	N/A	N/A	280309	106973	76025.9	65481.5	164411	219166	139531	62551.9	111838	63340.5	60795.7	90420.2	79479.8	82796	118859	26823.2	N/A	32405.8	106613	79026	82791	160125	89281.2	110741	61766.6	238748	33373.8	136853	101330	37148.3	21650.2	33205.2	47027.4	88041.3	54727.4
Geranyl-PP_13C(M+2)_nega	49971.4	30934	26649.4	44266.8	313621	365022	389765	22365.1	30454	20137.9	31426	284517	229594	292687	N/A	12847.5	9519.75	19988.2	167527	138490	122774	21394.3	18052.5	22842.2	22857.6	241763	264126	205117	49523.1	54593.4	27603.3	27096.3	195129	140390	172134	52355.1	27603.7	21414.1	18047.9	105649	118985	75190.7
Geranyl-PP_13C(M+4)_nega	20425.1	11898.3	14043.9	N/A	67799.9	68468.3	53688.8	36640.7	30951.7	13445.3	23799.2	32269.6	41491.4	45887.2	11438.5	11895.6	6661.54	9517.14	15242.1	13802.2	13825.4	32823.9	24265.4	30450.5	18465.1	42355.6	63772	41490.1	30952.5	20465.2	18562.2	21415.8	83198.8	62677	60375.8	18590.1	11912.1	N/A	16181.4	55303.8	81584.6	62342.3
Geranyl-PP_13C(M+6)_nega	108082	121181	107686	118977	82076.7	101161	90365	99222.2	112348	101743	131144	42271	74177.6	56095.8	14716.1	32088	40605.6	36174.4	15262.1	20941	21891.9	59486.9	82586.8	74264	80954.2	80102.1	82813.3	66148	79513.8	71494.4	70783.1	99519.7	42572.9	45784.9	44489.7	102318	147551	118246	118860	85521.9	101844	64411.7
Geranyl-PP_13C(M+8)_nega	39975.7	39975.8	10874	8723.47	51381.6	29739.4	29028.6	14988	74221.9	13597.4	56165	50033.1	53440.7	51140.9	32387.6	31885.1	32368.8	36588.3	13681.4	14304.2	25718.8	18308.5	37120.9	62325.5	49022.4	38261.1	39413.3	42696.6	19458.8	69364.7	36147.7	70351.2	68053.3	53514.1	51728.7	16419.6	4429.41	11904.9	5708.18	20520.2	33261.5	19010.7
Geranyl-PP_nega	509011	811890	649609	812112	226537	319336	232715	302630	272880	252219	290141	95177.8	107559	100845	92810.1	151345	166510	126143	121356	82807.8	76141	143737	208599	278782	254979	110867	120889	101837	99598.5	133948	109080	135193	82330.2	77083.2	81359.2	391245	449551	409181	442527	53835.5	71349.5	42826.8
glucosamine_13C_posi	716129	528663	417563	374116	491118	628152	662058	429574	309720	266802	332646	346318	210522	252085	553122	608506	508199	497198	361442	389267	273994	334535	229099	229050	253859	337447	348473	340778	445194	242894	262972	295074	290260	282750	245981	380702	225607	156094	223195	274931	220704	234836
glucosamine_posi	491615	176235	162163	N/A	346062	144126	186111	75967.6	285657	247443	340186	129470	123916	157828	217121	547507	460636	161920	263892	260708	184065	59539.8	137129	152161	218517	142352	166982	66831.5	50013.8	114666	106034	117974	N/A	124272	44283.1	188154	126408	101726	123034	42470.6	N/A	130266
glucose-1-phosphate_13C_nega	107198	348458	324256	331045	308520	260661	200773	243935	417110	357412	367206	335598	326874	357242	81390.1	326513	295290	376774	172787	173418	98100.5	178806	411396	449315	480802	286581	263466	108315	168686	328394	386761	438417	343237	278216	268171	104388	230298	433221	360868	168785	170299	162202
glucose-1-phosphate_nega	334179	468111	505869	472659	120889	125286	106805	311052	179063	231333	168336	272798	245651	233406	113607	158451	149402	156854	160904	141767	115966	368562	167048	220795	221131	211640	211464	170433	383046	246584	232773	259709	211456	235738	246341	227937	177739	140140	144313	146661	137965	164711
glucose-6-phosphate_13C_nega	N/A	N/A	3992.32	21708.2	11946.6	N/A	N/A	N/A	N/A	N/A	N/A	6551.83	2753.66	7972.3	3314.51	N/A	6694.22	11188.4	N/A	N/A	N/A	N/A	22217.2	4178.89	14757.4	N/A	N/A	8008.79	3839.44	N/A	N/A	13372	N/A	8128.12	N/A	4582.11	N/A	N/A	N/A	N/A	7839.88	N/A
glucose-6-phosphate_nega	303684	333311	360935	300928	28515.7	35698.8	37127.8	446994	372444	333504	326623	30170	35967.7	21229.6	143373	269717	254418	105936	37645.1	32359.7	20850.2	291693	202295	236070	330714	35664.1	20531.4	23597.2	310353	230815	216474	209486	6012.23	32658.3	26342	121460	101550	74242.7	29225.7	21708.7	11695.5	16174.8
glutamate_13C(M+1_0)_posi	438414	75667.1	109453	67576.3	299859	292447	257848	778315	67579.6	87091.5	70907	487299	510991	508490	440273	263603	284126	270724	316515	366497	245520	502601	117549	85187.6	108512	467553	388024	499562	969750	550615	435939	545391	628335	661275	496829	387293	145631	153240	190364	318857	334115	319803
glutamate_13C(M+1_1)_posi	1.43832e+06	673047	762130	590484	1.17312e+06	1.28706e+06	1.2468e+06	2.53797e+06	768503	769356	823343	1.99122e+06	2.66093e+06	2.82373e+06	1.3352e+06	1.77501e+06	2.00439e+06	1.93213e+06	1.41803e+06	1.52732e+06	1.21883e+06	1.84828e+06	1.14248e+06	941527	1.06473e+06	2.09782e+06	2.2296e+06	2.31446e+06	2.90775e+06	2.98983e+06	2.85529e+06	3.17764e+06	3.18387e+06	2.50822e+06	2.59927e+06	1.76165e+06	1.24561e+06	1.3997e+06	1.44957e+06	1.55114e+06	1.42239e+06	1.4996e+06
glutamate_13C(M+2_1)_posi	131316	659605	615345	616295	162378	225288	207875	157009	872818	787632	767157	272550	219907	310211	128481	1.39908e+06	1.32191e+06	1.45817e+06	309803	251060	267652	125108	959883	1.04514e+06	967983	247280	257920	258838	172742	2.2381e+06	1.80504e+06	1.9603e+06	696484	620547	631515	78123.1	886620	1.00701e+06	777147	285271	294378	246155
glutamate_13C(M+2_2)_posi	86271.6	400201	453885	418390	4.19271e+06	4.30849e+06	3.36081e+06	196733	571066	865477	502051	5.1157e+06	5.55277e+06	5.72949e+06	76259.5	565297	798809	681774	6.21552e+06	8.05411e+06	6.46284e+06	132626	765924	671762	586544	6.06492e+06	5.39388e+06	6.21943e+06	187716	1.28299e+06	1.12402e+06	1.36926e+06	9.62326e+06	8.94096e+06	9.92171e+06	130526	939884	837739	1.0287e+06	6.1958e+06	8.44974e+06	5.87297e+06
glutamate_13C(M+3_2)_posi	9047.87	3.69882e+06	4.06105e+06	4.31862e+06	117437	121427	115237	14753.9	5.27174e+06	5.25355e+06	4.10864e+06	209971	170314	248049	9995.53	7.60613e+06	7.48854e+06	6.61048e+06	265163	231764	293697	9519.29	7.59547e+06	6.74185e+06	5.6701e+06	252804	204916	222766	10464.9	8.81365e+06	7.3472e+06	7.84299e+06	787759	765161	686308	8594.57	6.27845e+06	4.77212e+06	5.7786e+06	205811	413311	207017
glutamate_13C(M+3_3)_posi	5918.67	140855	166802	176391	498558	596998	698758	9991.27	231913	269011	172718	887212	687222	745632	10553.1	201477	191694	167513	1.29229e+06	1.21027e+06	1.31293e+06	13801.7	255016	242626	219879	1.08972e+06	945445	1.01446e+06	19034.3	395966	304979	371252	3.20334e+06	2.35612e+06	1.837e+06	12349.4	234445	220633	280351	732960	1.19862e+06	941794
glutamate_13C(M+4_3)_posi	N/A	976957	1.02592e+06	1.10129e+06	467300	647469	464970	N/A	1.35444e+06	1.87282e+06	1.17014e+06	452999	586658	768873	N/A	913698	1.05548e+06	893152	1.06175e+06	1.29471e+06	1.69108e+06	N/A	1.85073e+06	1.24334e+06	1.48642e+06	1.29984e+06	998914	822326	N/A	1.62403e+06	1.32946e+06	1.61029e+06	2.49596e+06	2.54001e+06	2.4379e+06	3806.22	1.25306e+06	1.02969e+06	1.28071e+06	795089	1.22612e+06	723348
glutamate_13C(M+5)_posi	N/A	1.9652e+07	2.20538e+07	2.6766e+07	189410	213202	199881	N/A	3.17727e+07	3.47575e+07	3.21555e+07	580632	483484	401183	N/A	1.94463e+07	2.14824e+07	2.23232e+07	602508	590552	848106	N/A	3.28061e+07	2.62421e+07	3.01889e+07	698988	510270	312640	3802.84	3.43101e+07	3.08795e+07	3.04238e+07	1.71084e+06	1.80571e+06	1.57281e+06	N/A	2.22684e+07	2.47242e+07	2.50517e+07	511624	743840	362207
glutamate_posi	2.81758e+07	877608	1.18927e+06	859886	2.27781e+07	2.22494e+07	1.83021e+07	4.09495e+07	1.79032e+06	1.61645e+06	2.2859e+06	2.9053e+07	2.95281e+07	3.18044e+07	2.99126e+07	2.74554e+06	2.67951e+06	3.28459e+06	2.25803e+07	2.28764e+07	2.22443e+07	3.41448e+07	1.36367e+06	1.16113e+06	1.372e+06	3.06599e+07	2.54753e+07	2.93076e+07	4.72754e+07	4.1668e+06	4.51061e+06	5.42316e+06	3.67911e+07	3.50481e+07	3.24779e+07	3.25841e+07	1.54746e+06	1.87364e+06	1.9441e+06	2.09521e+07	2.37773e+07	2.3454e+07
glutamine_13C(M+5)_posi	N/A	8.75744e+06	6.59049e+06	8.10327e+06	224618	246665	229445	N/A	8.39282e+06	1.04308e+07	8.65983e+06	522313	525402	666543	N/A	7.00491e+06	5.72093e+06	6.09435e+06	553056	512819	562085	N/A	1.07151e+07	8.83619e+06	7.91366e+06	493112	435202	345438	6662.47	8.77792e+06	7.47179e+06	1.01943e+07	1.56799e+06	1.45705e+06	1.28948e+06	N/A	5.03928e+06	6.00191e+06	7.74889e+06	480566	744418	459259
glutamine_posi	1.07066e+07	238517	395320	279523	8.85475e+06	7.1571e+06	7.9979e+06	1.21743e+07	570940	630165	602027	8.95241e+06	1.02355e+07	1.14171e+07	9.72184e+06	866013	731558	797941	6.07338e+06	7.11931e+06	6.97196e+06	1.23107e+07	392684	462343	468891	1.05546e+07	8.89525e+06	1.01783e+07	2.02986e+07	1.12967e+06	1.46949e+06	1.66571e+06	1.27326e+07	1.12772e+07	1.3169e+07	9.38229e+06	464662	458552	656449	7.07877e+06	6.14297e+06	6.97464e+06
glutathione disulfide_13C(M+10)_nega	N/A	9.062e+06	9.57393e+06	8.82276e+06	30931.4	10944.8	4789.5	17131.3	1.28359e+07	1.36454e+07	1.34287e+07	72913	53301.4	32836.5	N/A	N/A	3.87475e+06	N/A	61391.4	N/A	39974.3	N/A	1.4569e+07	1.20242e+07	1.36883e+07	114423	70432.7	N/A	6186.34	7.55841e+06	7.34957e+06	6.18006e+06	87069.6	56155.6	51875.7	N/A	N/A	9.93884e+06	N/A	72828.9	N/A	N/A
glutathione disulfide_13C(M+10)_posi	N/A	2.46145e+06	2.46931e+06	2.52258e+06	9992.66	7615.25	N/A	N/A	2.49286e+06	3.32894e+06	4.07377e+06	21388.2	12374	6186.25	N/A	1.14433e+06	1.15152e+06	1.32878e+06	13800.1	5710.93	13324.7	N/A	4.09073e+06	2.76099e+06	3.56963e+06	32838.4	14752.5	6186.67	N/A	1.89304e+06	1.57483e+06	1.72555e+06	20468.3	9046.7	6663.09	N/A	3.74471e+06	2.43847e+06	2.40346e+06	9518.2	12372.5	5235.44
glutathione disulfide_13C(M+5_0)_nega	10946	1.80352e+06	1.71288e+06	1.58939e+06	480609	360736	240593	227857	3.50393e+06	3.10518e+06	3.0733e+06	728688	752410	720674	136119	1.45757e+06	1.02838e+06	1.13641e+06	515212	471106	425931	188935	1.91223e+06	1.78596e+06	1.68743e+06	1.06364e+06	812830	672444	218410	2.94616e+06	3.26885e+06	2.56678e+06	921004	823362	762888	345044	3.16538e+06	2.44984e+06	2.66626e+06	792733	812364	637675
glutathione disulfide_13C(M+5_0)_posi	N/A	404384	434454	525802	102789	78998.3	81855.8	43785.1	585594	786680	1.04751e+06	180283	154670	200355	70910.4	310272	233691	305465	129443	176089	111360	41860.9	442929	413088	622917	181839	167518	123258	65675.3	669232	640975	919303	165143	182269	149435	67577.7	755363	554205	478252	143247	158007	111958
glutathione disulfide_13C(M+5_5)_nega	N/A	1.69936e+06	1.86561e+06	1.56939e+06	328863	318920	251754	248425	3.42242e+06	3.31587e+06	2.92396e+06	750495	674273	703346	118933	1.24804e+06	1.00777e+06	1.06062e+06	343116	388337	345015	168948	1.88789e+06	1.71044e+06	1.6284e+06	1.01597e+06	686353	555853	206071	3.02304e+06	3.26729e+06	2.46032e+06	790391	694683	526349	195652	3.16093e+06	2.37966e+06	2.48574e+06	661990	503943	442563
glutathione disulfide_13C(M+5_5)_posi	N/A	498588	477796	444854	131830	94704.1	59508.3	61868.8	578680	640727	812792	156095	160910	177987	43784.1	355982	270303	276951	112319	124218	104699	41418.5	559220	546688	534435	218885	129918	128984	56632.8	727369	586873	865449	217490	164129	140830	83254.3	977382	788958	679144	212734	128968	99941.5
glutathione disulfide_nega	1.61972e+07	373497	351242	297663	1.32864e+07	1.35437e+07	1.1588e+07	2.72236e+07	820578	741918	675791	1.59325e+07	1.79463e+07	1.68612e+07	1.30548e+07	411834	269107	288830	5.89488e+06	7.26588e+06	5.69693e+06	2.586e+07	347319	337338	255097	1.26574e+07	1.22922e+07	1.33405e+07	1.9792e+07	1.48681e+06	1.17949e+06	1.09888e+06	8.83785e+06	1.25366e+07	1.01382e+07	1.66056e+07	809047	593143	636325	1.37973e+07	1.10265e+07	1.17448e+07
glutathione disulfide_posi	4.76442e+06	73808.4	95626.7	66897.4	3.39656e+06	3.01899e+06	3.21415e+06	6.13473e+06	133187	114217	136589	3.22902e+06	3.7854e+06	3.48836e+06	2.9034e+06	88515.7	82805.2	60439.2	1.42704e+06	1.67232e+06	1.2327e+06	6.18522e+06	69548.9	100419	55200.4	1.92767e+06	2.30356e+06	2.26207e+06	4.71647e+06	233671	243678	215003	1.913e+06	2.06644e+06	1.54326e+06	3.73336e+06	199368	115780	121339	3.40288e+06	2.10507e+06	2.23207e+06
glutathione_13C(M+2)_nega	513067	556233	669806	542507	1.84532e+06	1.75301e+06	1.52466e+06	346218	634781	767623	757686	1.04136e+06	1.22009e+06	1.50395e+06	945848	1.22171e+06	1.34144e+06	1.62921e+06	4.72191e+06	3.36641e+06	3.91772e+06	737650	785674	1.02069e+06	914725	2.51421e+06	2.76413e+06	3.04726e+06	834497	1.29301e+06	1.05075e+06	1.10233e+06	2.48318e+06	2.21e+06	2.66243e+06	1.48081e+06	908738	1.51374e+06	1.44961e+06	2.60832e+06	4.21965e+06	3.79515e+06
glutathione_13C(M+2)_posi	1.0968e+06	114394	184254	122221	661358	727823	657659	338438	214711	123818	146036	610715	422552	631470	1.166e+06	276655	253010	215672	1.04029e+06	1.1858e+06	1.23555e+06	1.15166e+06	202159	241120	165484	1.45155e+06	1.64505e+06	1.95237e+06	1.18859e+06	286793	229888	305914	2.81025e+06	2.14854e+06	2.52462e+06	1.5891e+06	157199	287852	253211	1.93041e+06	2.57395e+06	2.34795e+06
glutathione_13C(M+5)_nega	N/A	5710.92	26174.9	17609.8	8089.48	4758.65	8570.84	N/A	9518.85	N/A	8098.87	N/A	9513.38	N/A	N/A	21889.7	16181.5	13320.8	3806.27	N/A	N/A	8090.89	7151.82	10468.4	18561.4	N/A	N/A	N/A	N/A	N/A	7612.76	6184.83	5709.31	5712.31	11886.5	N/A	N/A	19024.6	N/A	6661.29	11878.5	7141.25
glutathione_13C(M+5)_posi	N/A	8.37909e+06	1.3877e+07	1.10701e+07	995989	646686	413438	274302	7.31476e+06	5.53103e+06	6.13348e+06	886249	681215	607716	313408	1.52963e+07	1.5309e+07	1.52281e+07	1.51634e+06	991562	949789	151099	1.29534e+07	1.78346e+07	1.58943e+07	1.36493e+06	1.1289e+06	741344	416691	1.11551e+07	8.61264e+06	1.23402e+07	2.03191e+06	1.01385e+06	853487	290070	8.63847e+06	2.2892e+07	1.64636e+07	1.5689e+06	1.23192e+06	898239
glutathione_13C(M+7)_nega	23319.3	379373	431948	415898	56296.1	15739.3	16744.9	27085.7	211275	237407	282575	53734	29520.5	21932.3	13324.7	606155	535732	589755	61195.8	31866.8	42446.8	9561.66	479705	586436	562375	43774.8	44758.3	36645.8	17608.3	318185	290112	361374	41662	25221.3	22817.1	33267.5	253658	722088	693860	47749.5	41360.3	46046.7
glutathione_13C(M+7)_posi	N/A	674057	595620	595582	48151.7	35694	28554.2	12849	468459	404355	394598	55618.8	53224.1	32149.3	8557.21	985484	885624	883610	98384.3	49876.4	71666.1	13897.6	706154	950661	982818	95642.6	59394.2	42033.9	26700.8	552116	347452	577636	171420	108379	106944	22816.2	432450	1.11198e+06	959418	95535.8	90304.2	54485.6
glutathione_nega	1.01354e+07	1.96673e+06	1.97491e+06	1.35691e+06	9.07229e+06	9.73792e+06	9.33831e+06	4.97892e+06	2.03982e+06	1.54137e+06	1.68336e+06	5.54517e+06	5.64648e+06	6.98244e+06	1.44842e+07	3.61696e+06	3.46773e+06	4.00543e+06	1.20807e+07	1.01987e+07	1.19788e+07	1.40929e+07	1.87706e+06	2.30532e+06	1.87889e+06	1.024e+07	1.17439e+07	1.16568e+07	1.35024e+07	3.71745e+06	2.94543e+06	3.10242e+06	1.14556e+07	1.08155e+07	1.20544e+07	2.2087e+07	2.18716e+06	3.99716e+06	3.7564e+06	1.32036e+07	1.82592e+07	1.76038e+07
glutathione_posi	1.69465e+07	2.38841e+06	2.23344e+06	2.22007e+06	1.1616e+07	1.30973e+07	1.35703e+07	7.46969e+06	2.13086e+06	2.02884e+06	2.02018e+06	7.23866e+06	6.73236e+06	7.55919e+06	2.02768e+07	5.48697e+06	4.67398e+06	6.21466e+06	1.85131e+07	1.51446e+07	2.07784e+07	1.8389e+07	2.93057e+06	3.27772e+06	2.80934e+06	1.36505e+07	1.38964e+07	1.56308e+07	2.12529e+07	6.10731e+06	3.94415e+06	5.09852e+06	1.84672e+07	1.44241e+07	1.41446e+07	2.80625e+07	3.65375e+06	5.77714e+06	5.65113e+06	2.18658e+07	2.10233e+07	2.08416e+07
glyceraldehdye-3-phosphate_13C_nega	N/A	N/A	N/A	N/A	1.78825e+06	2.41002e+06	2.22508e+06	5711.78	8924.88	8555.8	6797.9	4.9703e+06	6.02782e+06	5.29168e+06	11886.6	6245.93	N/A	N/A	1.33869e+06	902450	1.55056e+06	N/A	N/A	4624.76	6424.84	1.98277e+06	1.74609e+06	1.60394e+06	12492.5	16060.4	9640.85	5677.6	224060	4.97804e+06	3.89477e+06	N/A	5714.16	6423.58	6766.53	2.56236e+06	5.73325e+06	1.20716e+06
glyceraldehdye-3-phosphate_nega	2.40022e+06	2.14964e+06	3.44826e+06	2.56709e+06	29626.8	33811.6	38092.9	4.84175e+06	5.32368e+06	7.01656e+06	6.12199e+06	63852.5	56010.8	57290.9	1.32821e+06	979298	1.09827e+06	2.80259e+06	16723.1	17822.9	23787.9	1.54805e+06	4.16708e+06	3.63012e+06	5.36377e+06	37794.7	19091.3	30952.1	3.32479e+06	4.2117e+06	3.24538e+06	5.1147e+06	32586.7	56932.6	68913.2	2.55067e+06	2.92305e+06	2.30845e+06	3.79494e+06	39147.5	51365.5	21012.4
glycerate_13C_nega	N/A	N/A	N/A	N/A	N/A	6097.05	N/A	N/A	N/A	N/A	6651.47	12029.8	7063.13	19770.9	N/A	N/A	N/A	N/A	13686.2	6014.27	9191.11	N/A	N/A	7471.05	N/A	25720.5	19324.8	27623	N/A	N/A	N/A	4951.36	26051.4	19248.1	23887.1	N/A	N/A	N/A	N/A	8362.6	10621.4	8091.29
glycerate_nega	772966	866313	800636	901151	787724	800012	702378	1.57194e+06	1.3545e+06	1.39471e+06	1.20874e+06	1.17942e+06	1.28775e+06	1.43951e+06	819239	747955	746127	693988	732625	719459	762327	1.20145e+06	1.12721e+06	1.15876e+06	1.17386e+06	1.15532e+06	1.07931e+06	893414	1.36873e+06	1.30458e+06	1.44152e+06	1.15088e+06	1.00122e+06	1.03213e+06	1.00404e+06	717889	619100	574792	561072	547170	583566	596129
glycine_13C_posi	N/A	N/A	N/A	N/A	N/A	N/A	N/A	N/A	N/A	N/A	N/A	3925.92	4053.32	8813.69	N/A	N/A	N/A	N/A	8566.42	4999.61	6781.71	N/A	N/A	N/A	N/A	33551.1	27171	32125.1	N/A	N/A	N/A	N/A	44608.9	59587.2	50589.5	N/A	N/A	N/A	N/A	8926.34	23526.2	7490.35
glycine_posi	N/A	N/A	N/A	N/A	N/A	N/A	N/A	N/A	N/A	N/A	N/A	N/A	N/A	N/A	N/A	N/A	N/A	N/A	N/A	N/A	N/A	N/A	N/A	N/A	N/A	N/A	6781.61	N/A	N/A	N/A	N/A	N/A	N/A	N/A	N/A	N/A	N/A	N/A	N/A	N/A	N/A	N/A
hexose-phosphate	5.83809e+06	6.45848e+06	7.56266e+06	6.62818e+06	1.52867e+06	1.56095e+06	1.46944e+06	6.76884e+06	6.4633e+06	6.16373e+06	6.52128e+06	1.11795e+06	1.06873e+06	1.02147e+06	2.99593e+06	3.78834e+06	4.05671e+06	2.56183e+06	1.25555e+06	1.02457e+06	1.11494e+06	5.71692e+06	4.14424e+06	4.73828e+06	6.58036e+06	2.12239e+06	2.26343e+06	2.01119e+06	7.55313e+06	6.41955e+06	6.05081e+06	6.00627e+06	4.37155e+06	3.60595e+06	3.62472e+06	3.14485e+06	2.49679e+06	2.58811e+06	2.51633e+06	1.44709e+06	1.56105e+06	1.28947e+06
hexose-phosphate_13C_nega	123995	140529	140780	152635	5.16389e+06	5.3222e+06	4.52233e+06	231122	241899	196160	191517	5.88111e+06	6.02085e+06	6.1755e+06	113674	145869	114685	115476	3.23818e+06	2.6081e+06	3.18609e+06	110140	185860	186153	212019	4.38035e+06	4.39641e+06	4.2622e+06	205193	301558	378969	335723	3.74834e+06	3.79971e+06	3.97505e+06	151443	71968.2	102534	83602	1.02445e+06	2.61775e+06	1.05121e+06
HMG CoA_13C_nega	N/A	N/A	N/A	N/A	N/A	N/A	N/A	N/A	N/A	N/A	3926.16	N/A	N/A	N/A	N/A	N/A	N/A	N/A	N/A	N/A	N/A	N/A	N/A	N/A	N/A	N/A	N/A	N/A	N/A	N/A	N/A	N/A	N/A	N/A	N/A	N/A	N/A	N/A	N/A	N/A	N/A	N/A
HMG CoA_nega	N/A	N/A	N/A	N/A	N/A	N/A	N/A	N/A	N/A	N/A	N/A	N/A	N/A	N/A	N/A	N/A	N/A	N/A	N/A	N/A	N/A	N/A	N/A	N/A	N/A	N/A	N/A	N/A	N/A	N/A	N/A	N/A	N/A	N/A	N/A	N/A	N/A	N/A	N/A	N/A	N/A	N/A
IPP_13C(M+3)_nega	7131.29	14005.6	14322.6	14558	33296.3	29487.1	13899.1	22835.7	18989.7	14272.7	6609.11	37605.1	40388.8	47108.6	12374	N/A	N/A	4747.05	21890.3	19513.6	20021.5	21905.2	21745.2	23882.7	14746	31323.6	48972.6	45737.6	22366	26050.7	24719.7	28484.7	41612.4	41888.1	36578.8	21407.3	13842.9	24123.3	12095.1	22945.4	21784	37963.9
IPP_13C(M+5)_nega	N/A	20977.9	N/A	14156.4	20877.4	19406	20299.7	9288.09	10058.6	9510.27	N/A	36595.3	34765.1	28542.2	6666.84	15719.2	9033.45	3335.5	15709	11880.5	14736.8	6612.29	8446.69	14243.7	12373.6	19511.1	20846.4	15513.4	N/A	N/A	3756.15	10476.4	10320.8	36650.3	25160.1	3799.48	N/A	8090.39	N/A	31772.8	43930.2	22872.6
IPP_nega	28903.9	21160.8	68380.2	71627.7	30092.2	27662.6	14943.2	116234	101901	103682	123704	32456.2	31554.1	53250.5	29366.3	35751.6	41678.5	26054.2	21391.1	15386.9	N/A	102064	92364.4	83447.1	91274.3	22536.6	51111.1	31965.8	120744	108417	130373	151946	73879.8	81851.1	56260.2	118269	88777.3	79227.1	61472.2	49612.4	56112.3	41085
isocitrate _nega	95380.8	43167.7	23088.6	29252.2	35093.8	46551.3	53643.2	49245.2	25235.2	38465.4	37478.1	30580.2	42775	37681.7	72728.9	36697.2	29301.3	37475.6	31530.1	42268.2	33301.3	135279	46944.2	31965.4	34999.4	49705.4	26025.8	53592.2	94700.7	34274.8	41829.6	42592.5	24998.4	30375.8	41846.2	6136.81	25184.5	31287.3	24156.4	21967.6	16967.6	15661.4
isocitrate_13C(M+1_0)_nega	N/A	290279	363506	447004	15226.5	21931.8	7227.89	N/A	121954	40929	103241	19758.3	8666.95	N/A	N/A	280321	189931	59490.3	15587.7	17883.4	25721.9	7173.05	78741.5	99001.9	67718.8	17245.2	7189.01	15221.6	N/A	22846.7	40442.1	23314.3	13875.1	8285.43	N/A	N/A	54732.3	39023.3	9517.8	13255.2	N/A	6196.21
isocitrate_13C(M+1_1)_nega	4285.02	23797.1	30961.6	46083.3	18089.1	9020.91	N/A	N/A	21437.4	25268.8	11320.1	11387.8	10887.8	9207.06	N/A	21415.7	34266.4	8981.4	13801.2	15741.5	8911.18	21892.9	35678.5	46645.4	35223.2	12563.9	8573.79	15932.9	11417.9	38434.3	54789.5	60873.3	26209.8	14498	11565.8	N/A	17064.6	16208.3	14761.9	N/A	N/A	N/A
isocitrate_13C(M+2_0)_nega	N/A	7139.21	8085.81	16655.3	3809.17	N/A	N/A	N/A	7146.13	N/A	N/A	N/A	N/A	N/A	N/A	12403.9	17607.9	N/A	N/A	N/A	N/A	N/A	5234.83	9025.38	9512.55	N/A	9994	N/A	N/A	N/A	8089.34	N/A	N/A	N/A	N/A	N/A	N/A	N/A	N/A	N/A	N/A	N/A
isocitrate_13C(M+2_1)_nega	N/A	23792.1	16176.8	28079.4	48647.2	23001.7	17924	N/A	24269.5	14755.5	16182.3	68140.7	10242.2	5674.89	N/A	16179.1	8067.53	4760.13	98231.7	30709.1	92919.3	N/A	33791.1	30927.8	20464.9	15630.3	36940.5	56197.6	N/A	9519.68	5705.67	15229.7	N/A	N/A	18726.8	N/A	5232.68	8089.19	10946.3	25875.3	4269.92	N/A
isocitrate_13C(M+2_2)_nega	6193.66	40722.8	56630.4	47608.2	39261	57547.9	37133.2	N/A	41919.9	41479.5	30457.2	42816.5	27818.6	36155.5	5287.8	42821	40925.8	22408.6	55144.4	69463.4	56302.9	N/A	56870	58937.1	59488.7	50926.8	59022.7	66496	N/A	39493.5	28082	30413.2	N/A	41436.1	19229.3	4222.06	27602.3	24632	36157.1	N/A	9533.46	N/A
isocitrate_13C(M+3_1)_nega	N/A	8797.59	N/A	3807.13	N/A	N/A	N/A	N/A	9977.59	N/A	4927.75	N/A	N/A	N/A	N/A	12880.3	7376.65	N/A	N/A	N/A	N/A	N/A	11893.7	8564.9	N/A	6663.28	N/A	N/A	N/A	N/A	N/A	N/A	N/A	N/A	N/A	N/A	N/A	N/A	N/A	N/A	N/A	N/A
isocitrate_13C(M+3_2)_nega	N/A	N/A	N/A	N/A	5146.04	3332.28	N/A	N/A	4270.25	10899.7	12844.2	N/A	4759.07	6648.57	N/A	12374.2	8124.84	10910.5	7139.28	4798.94	6185.03	N/A	N/A	9993.98	4284.8	N/A	13076.4	8539.83	N/A	11423.9	N/A	N/A	N/A	5699.35	7127.93	N/A	9049.44	6187.64	7138.62	N/A	N/A	N/A
isocitrate_13C(M+3_3)_nega	4283.16	N/A	N/A	N/A	13805.4	7972.52	9993.02	N/A	3804.67	N/A	N/A	4852.1	N/A	14666.3	11898	13445.9	9516.83	7136	10469.2	7950.08	16162.2	N/A	7138.94	N/A	N/A	19987.6	12336.4	6100.2	N/A	12848.5	N/A	N/A	5226.44	6676.34	5744.99	N/A	5696.93	N/A	N/A	N/A	8487.4	10710.8
isocitrate_13C(M+4_2)_nega	14769.7	54072.5	29507.8	36124.4	N/A	N/A	5234.05	15688.7	35145.2	29506.8	27085.2	6185.46	4291.62	5703.72	28554.1	99938.9	56609.8	92571.4	10945.2	21406.7	11412.9	6663.1	48101.8	28656.5	45687.7	6182.98	N/A	7142.92	4758.57	13324.6	10946.2	16653.7	N/A	11416.8	8566.48	51875.6	58062.4	34734.5	38546.5	N/A	N/A	5236.9
isocitrate_13C(M+4_3)_nega	N/A	5757.22	N/A	N/A	7123.56	6186.26	N/A	N/A	N/A	N/A	4280.37	18075.2	N/A	N/A	N/A	8565.52	6671.83	8566.49	16658.8	13673.1	17168.1	N/A	8559.65	7588.9	7615.6	14772.9	15230.9	20477.6	N/A	5710.77	N/A	N/A	10823.2	9007.87	N/A	N/A	6187.88	N/A	4273.67	8946.21	N/A	N/A
isocitrate_13C(M+4_4)_nega	N/A	15688.3	22126.8	16660.4	4275.61	12849.4	7619.8	5710.77	7584.85	8097.8	11421.5	11419.8	N/A	8095.47	N/A	21889.4	15704.2	14751.1	12366	8090.9	12848.2	N/A	N/A	9543.31	8088.92	16180	10463.7	19980.1	N/A	5741.99	N/A	N/A	4763.38	10943.3	7190.77	N/A	N/A	10469.1	N/A	4266.67	N/A	N/A
isocitrate_13C(M+5_3)_nega	N/A	9041.86	13336.7	22843.3	N/A	N/A	N/A	N/A	9750.98	N/A	6659.56	N/A	N/A	7138.63	N/A	8082.81	13801.7	3753.19	N/A	N/A	8089.36	N/A	19051.8	7130.83	N/A	N/A	N/A	N/A	N/A	3326.63	3331.49	N/A	N/A	N/A	N/A	N/A	N/A	N/A	4265.03	N/A	N/A	N/A
isocitrate_13C(M+5_4)_nega	N/A	6189.09	N/A	13293.9	11903.9	N/A	N/A	5710.21	N/A	N/A	N/A	N/A	7602.9	N/A	N/A	N/A	9029.82	7617.18	N/A	11886.4	7138.61	10941.3	8090.82	6187.71	7858.06	N/A	9993.82	N/A	N/A	N/A	7579.75	N/A	N/A	11898.4	7140.12	N/A	N/A	N/A	N/A	9041.59	N/A	N/A
isocitrate_13C(M+6_4)_nega	N/A	3807.65	4282.92	N/A	N/A	N/A	N/A	N/A	N/A	N/A	N/A	N/A	N/A	N/A	N/A	N/A	6186.21	N/A	N/A	N/A	6185.79	N/A	N/A	N/A	6640.85	N/A	N/A	N/A	N/A	N/A	N/A	N/A	N/A	N/A	N/A	N/A	N/A	N/A	N/A	N/A	N/A	N/A
lactate_13C(M+3)_nega	43128.1	1.85956e+06	1.85998e+06	2.15724e+06	6.48781e+07	5.97927e+07	4.78816e+07	1.43086e+06	2.19938e+06	2.28393e+06	1.92548e+06	7.54721e+07	7.68791e+07	7.16956e+07	156587	965052	1.01595e+06	823750	6.19469e+07	6.10954e+07	6.40807e+07	595814	2.88273e+06	3.15977e+06	2.72594e+06	8.01797e+07	8.10758e+07	7.55953e+07	905849	5.50959e+06	5.8795e+06	5.70409e+06	8.77874e+07	8.8028e+07	8.64212e+07	270380	4.11508e+06	4.17557e+06	3.73852e+06	7.06985e+07	7.66371e+07	7.04263e+07
lactate_nega	4.72888e+07	5.26688e+07	5.1389e+07	5.55171e+07	6.29701e+06	5.61468e+06	4.71112e+06	6.85597e+07	6.75551e+07	6.98598e+07	6.32586e+07	7.89209e+06	7.46044e+06	7.39944e+06	3.96456e+07	5.0135e+07	5.4407e+07	4.64954e+07	3.4837e+06	3.66735e+06	3.88293e+06	6.98548e+07	7.26179e+07	7.22588e+07	7.07531e+07	9.00192e+06	8.30107e+06	7.66415e+06	7.47304e+07	7.26091e+07	7.53901e+07	7.49302e+07	1.17453e+07	1.20781e+07	1.03665e+07	5.51201e+07	6.10338e+07	6.40935e+07	6.1921e+07	6.69127e+06	6.79299e+06	6.68293e+06
L-arginino-succinate	265506	36583.8	22402.9	40722.3	141263	184293	166564	508446	39198.3	51530.6	49099.3	254850	251109	209814	376673	96024.3	72015.4	67834.1	296785	380684	399978	586074	44311.2	53726.2	62715.3	375348	367431	364310	228007	57862.9	33725.4	61454.6	169250	145694	201511	716597	67473.1	80076.8	95199	320232	484900	311184
L-arginino-succinate_13C	130150	192287	173579	248384	12172	15388.9	11200.3	179765	196872	249653	313274	N/A	8781.25	9006.29	101520	202386	170745	74136.7	11633.5	6324.38	7479.78	182461	173632	183770	144579	N/A	N/A	N/A	173983	350962	277972	411558	9122.57	13837.3	8289.18	88700.4	401491	276904	264587	12925.3	7183.83	N/A
malate_13(M+4)_nega	68855.4	1.50592e+07	1.47678e+07	1.83809e+07	442048	302410	327844	N/A	1.12357e+07	1.18013e+07	1.15922e+07	411017	305225	315402	24239.1	1.53461e+07	1.43047e+07	1.56657e+07	1.10529e+06	758135	856152	56673.4	1.50831e+07	1.19523e+07	1.47101e+07	450380	456803	392488	N/A	1.25386e+07	1.30294e+07	1.3051e+07	878914	997769	644521	19320.8	1.88696e+07	1.98984e+07	2.22135e+07	1.0315e+06	1.0291e+06	639661
malate_13C(M+1)_nega	1.0909e+06	948357	1.27895e+06	1.08514e+06	1.6737e+06	1.47002e+06	1.05264e+06	833950	478899	780139	758047	1.12157e+06	1.1552e+06	852597	1.07714e+06	2.30383e+06	2.58914e+06	2.56541e+06	2.05551e+06	1.86507e+06	2.04893e+06	1.15832e+06	1.03654e+06	1.12546e+06	1.13924e+06	1.48358e+06	1.24185e+06	1.41676e+06	1.07917e+06	2.73693e+06	2.72809e+06	2.81032e+06	1.94448e+06	1.89995e+06	1.94396e+06	1.82749e+06	2.60307e+06	2.67872e+06	2.68377e+06	2.24697e+06	2.37162e+06	1.86969e+06
malate_13C(M+2)_nega	495792	3.26382e+06	3.7774e+06	3.56596e+06	4.02535e+06	3.07857e+06	2.60706e+06	327183	2.1448e+06	2.16379e+06	2.00534e+06	1.94593e+06	1.84666e+06	2.05311e+06	281866	4.7e+06	5.08518e+06	4.85428e+06	6.45969e+06	5.52727e+06	5.99747e+06	434176	3.62404e+06	3.15298e+06	3.34438e+06	3.3904e+06	3.32085e+06	3.94325e+06	375063	4.63141e+06	5.12885e+06	4.65478e+06	4.13976e+06	3.72943e+06	3.75127e+06	1.014e+06	7.32415e+06	7.2597e+06	7.27105e+06	5.87844e+06	6.96606e+06	4.6074e+06
malate_13C(M+3)_nega	24457.3	3.41355e+06	3.16677e+06	4.14812e+06	1.55034e+06	1.21645e+06	1.0363e+06	18759.4	2.46531e+06	2.60817e+06	2.63832e+06	1.33616e+06	1.48076e+06	1.59721e+06	18789.7	3.20644e+06	3.32251e+06	2.87058e+06	3.06668e+06	2.86476e+06	2.87731e+06	32043.3	3.72921e+06	2.74033e+06	3.46912e+06	1.50976e+06	1.23857e+06	1.32787e+06	21265.5	5.38332e+06	5.93653e+06	5.98896e+06	3.00157e+06	2.92089e+06	2.75449e+06	71974.3	7.21339e+06	7.47914e+06	6.98226e+06	3.56274e+06	4.20354e+06	3.01933e+06
malate_nega	2.01775e+07	1.53896e+06	1.58454e+06	1.59258e+06	2.21543e+07	1.73367e+07	1.52123e+07	1.43762e+07	2.28802e+06	2.5575e+06	2.08912e+06	1.08353e+07	1.22152e+07	1.38925e+07	1.97098e+07	3.56105e+06	4.10141e+06	3.89712e+06	1.96691e+07	1.8812e+07	2.14139e+07	1.92572e+07	1.52037e+06	1.39404e+06	1.81566e+06	1.41607e+07	1.57858e+07	1.71191e+07	2.10747e+07	4.17645e+06	3.70642e+06	4.01081e+06	1.91272e+07	1.62936e+07	1.51456e+07	3.04314e+07	4.78445e+06	5.12231e+06	5.58052e+06	2.11637e+07	2.29842e+07	2.49785e+07
mevalonate_13C(M+2_0)_nega	49371.3	84920.9	69161.2	77229	49653.7	44912.2	14008	243399	365132	434675	437270	141264	124605	102593	17098.8	19038.6	22291.7	32348.8	12771.2	38018.7	16751	68740.9	69463.2	73954.9	110881	71663.1	26543.4	38551.5	449020	447393	485080	478801	117657	109424	86962	1.03525e+06	750893	993130	1.01051e+06	131115	125416	110497
mevalonate_13C(M+2_0)_posi	284440	245306	236741	332773	262338	264056	221567	361322	270264	298706	286957	289579	275545	310025	221795	185824	232492	207300	213038	178472	230227	311253	268280	261702	255265	285386	338939	247246	209700	192696	232452	176497	178833	182693	162770	159995	152512	190903	177516	174936	167785	153570
mevalonate_13C(M+2_2)_nega	N/A	N/A	N/A	N/A	6606.36	N/A	N/A	7402.24	N/A	N/A	5082.68	5711.78	3797.87	8094.02	N/A	N/A	N/A	N/A	7399.98	N/A	N/A	N/A	N/A	N/A	N/A	10227.9	31395.9	N/A	N/A	4741.4	N/A	4602.84	4947.62	13341.2	N/A	N/A	N/A	N/A	N/A	N/A	N/A	N/A
mevalonate_13C(M+2_2)_posi	184185	215573	280792	258898	213819	243574	215112	300293	249319	322938	288494	294584	333005	350734	183701	191798	214662	198923	219181	181243	226617	345544	314101	314042	323526	386743	337775	307459	212399	206238	203943	193220	184078	202709	161725	138488	119456	155145	166571	172741	145485	155705
mevalonate_13C(M+4_0)_nega	4264.86	236582	257565	279031	8459.06	N/A	23537.9	6925.36	336786	330359	284676	12026.6	9522.39	12978.4	N/A	118366	134925	121843	10687.8	N/A	7149.14	61881.1	300759	282563	256590	17587	31734.4	N/A	N/A	288168	337252	332909	50302.7	N/A	14380.4	282144	499478	380397	432993	8119.83	14407.2	22773
mevalonate_13C(M+4_2)_nega	N/A	20016.4	21457.6	21038.8	N/A	N/A	N/A	N/A	31367.7	28051.2	16183	6662.01	N/A	N/A	N/A	14778.8	18075	19544.8	N/A	N/A	N/A	N/A	35660.3	31830.4	31873.4	15713.8	15693.2	10472.1	N/A	33318	22851.8	22822.2	8093.45	N/A	3332.94	8083.76	18688	25276.7	22607.8	N/A	N/A	N/A
mevalonate_13C(M+4_2)_posi	10469.6	8564.37	12851.3	9042.53	7138.59	8566.91	7138.62	12370.7	9657.97	18562.3	5718.46	9971.33	7614.15	N/A	21891.4	51911.9	57586.1	48541.9	25698.3	24273.5	28666.3	11420	13802	19551.4	14755.3	19036.2	6155.39	9994.17	65167.8	87547.9	79955.3	90300	83130.1	85430.2	47310.9	20473.4	28073.8	39071	35679	25641.9	30929	22845
mevalonate_13C(M+4_4)_posi	12376.9	26462.9	34362.8	32249.7	13324.8	12362	10935.1	17132.6	27919.3	22497.5	23326.1	13795	19489.4	20461.9	14748.3	19088.2	20412.6	20393.7	18067.4	22841.9	11372	9173.95	16255.5	24174.3	27650	18559.9	20008.4	17608.3	16654.8	19612.1	14959.8	19504.1	17153.7	15224.3	18916.4	6186.2	18627.6	24144	12728.2	14277.3	12376.7	12844.3
mevalonate_13C(M+6)_nega	N/A	N/A	N/A	N/A	N/A	N/A	N/A	N/A	N/A	N/A	N/A	N/A	N/A	N/A	N/A	N/A	N/A	N/A	6200	4055.11	5710.93	N/A	N/A	N/A	N/A	8565	5239.47	N/A	N/A	N/A	N/A	N/A	N/A	N/A	N/A	N/A	N/A	N/A	N/A	4294.02	8649.94	27642.1
mevalonate_13C(M+6)_posi	N/A	19883.9	15232.9	14276.7	N/A	N/A	4283.18	N/A	13580.1	12856.2	12337.2	9895.81	N/A	6184.62	N/A	35642.8	44258.8	29033.6	35697.1	37596.9	32835.6	N/A	24269.3	22821.4	16653.8	10906.6	7609.27	11422.1	N/A	119288	137559	161353	66148.8	67098.8	52355.8	N/A	42239	50265.4	61778.1	26651.5	36170.8	32837.8
mevalonate_nega	4601.51	73282	85366.2	27723.9	71768.7	15995.8	56686.1	99244.1	83117.6	130137	99927.4	70722.7	96476.7	91693.5	N/A	6497.89	12695.3	4478.64	18608.6	55784	62649.7	32529.8	N/A	23538.2	48129.4	57007.1	32763	42857.4	27190.4	20886.1	23790.1	88160.7	33972	74950.4	29043.8	22710.7	23233.2	N/A	24749.2	3815.73	24912.2	35472.2
mevalonate_posi	35744.2	31728.1	37777.4	29821.5	26734.6	35168.3	23798.7	31738.1	34720.8	26108.3	27874	40423.5	31887.4	21005.2	22860.1	26115.9	20067.9	38827.3	34165.5	31233	32948.5	41896.5	34720.8	23790.4	36922.8	37001.1	30824.6	28149.7	45469.1	26174.1	15609.4	12896.3	26432.2	33834.1	19904.4	24047.6	17132.1	23253.3	17303.5	21224.8	24706.7	18912.9
mevalonate-5-phosphate_13C_nega	N/A	16727.2	5760.76	6956.68	145996	178828	181435	4373.48	4838.45	6820.04	28581.1	201726	238835	211136	N/A	4933.45	4679.21	N/A	135490	96336.3	176172	19274.1	18732.7	10523.2	12920.1	100643	92230.4	76629.9	7333.71	9155.82	6397.62	3931.76	147833	149559	139259	7763.86	21772.8	10541.7	9870.13	469748	490031	654369
mevalonate-5-phosphate_nega	67349.8	62436	79826.4	73472.5	N/A	N/A	5632.46	50001	69661.4	54159.5	77671.1	11736.6	4865.25	6406.71	16773.4	29021.9	28557.1	33175.3	N/A	N/A	N/A	52330.4	42993.3	70587.2	56036	14249.5	7844.17	13863.8	34628.4	41384.6	42026.6	26661.3	8941.86	12681.7	7115.54	78621.7	75091.9	51280.1	83054.1	N/A	8888.69	9146.97
mevalonate-5-pyrophosphate_13C_nega	5710.88	113514	111720	116004	6067.75	N/A	N/A	10032.5	49613	36406.6	53537.8	15347.3	12122.6	11041.8	5354	102414	103891	74599.6	12135.3	6423.9	8303.8	13925.9	47118.8	85666.5	61713	12918.6	7495.47	N/A	15788.4	12229.5	46757.3	42837.7	15623.7	13558.9	11778.7	N/A	41048.9	71763.4	66547.9	8921.95	11421.9	3929.43
mevalonate-5-pyrophosphate_nega	3.93871e+06	754539	695032	729159	3.48206e+06	3.7526e+06	3.96262e+06	2.29675e+06	774147	724466	643211	2.61075e+06	2.68824e+06	2.66014e+06	6.48003e+06	1.52993e+06	1.38632e+06	1.64752e+06	5.60856e+06	4.54376e+06	5.7698e+06	5.14503e+06	760608	856040	728265	3.9173e+06	4.78688e+06	5.12885e+06	5.52745e+06	1.46588e+06	1.2592e+06	1.51986e+06	4.88265e+06	4.06547e+06	4.75044e+06	1.12496e+07	848147	1.68059e+06	1.66536e+06	5.18713e+06	9.39134e+06	6.9845e+06
N-acetyl-glucosamine-1-phosphate_13C_nega	74985.2	99902.2	118749	113008	1.23955e+06	1.18454e+06	1.14659e+06	168977	150220	174685	198793	334981	399769	481633	37747.3	88324.6	73797.9	102254	412456	360855	384085	265980	260103	269371	271566	387088	439808	431642	243185	320434	272872	266647	1.01601e+06	1.11615e+06	1.0358e+06	200906	155832	146387	182034	1.2115e+06	2.31221e+06	1.34896e+06
N-acetyl-glucosamine-1-phosphate_13C-Ac_nega	72644	24074.3	30323.3	53217.2	622270	728345	656374	96168.9	65353.9	55983.9	76590.7	256262	281991	306981	38294	43650.4	42065	68909.1	210657	190631	252493	85834.6	59656.8	62952	82308.4	228206	241886	242391	85047.3	78314.7	96195.3	77439	715583	953608	822661	84641.7	72073.1	67416.5	86580.6	840453	1.66086e+06	842791
N-acetyl-glucosamine-1-phosphate_nega	2.08642e+06	1.68397e+06	1.29555e+06	1.63208e+06	502899	486596	438563	2.93087e+06	855567	1.26563e+06	857127	630057	784225	1.0529e+06	724973	666299	579538	689848	195184	193093	226873	745155	510965	595662	577490	336597	326504	228139	2.49311e+06	2.04251e+06	2.04622e+06	2.16376e+06	888452	923886	843345	4.54526e+06	4.98831e+06	2.90021e+06	4.54791e+06	934222	1.76147e+06	952787
N-carbamoyl-L-aspartate_13C	N/A	N/A	N/A	N/A	N/A	N/A	N/A	N/A	12492.4	10350.9	7495.56	N/A	N/A	5353.92	N/A	N/A	N/A	N/A	N/A	N/A	N/A	N/A	9993.87	N/A	6424.78	8566.99	N/A	7140.9	N/A	N/A	N/A	N/A	N/A	N/A	N/A	N/A	N/A	N/A	N/A	N/A	N/A	8566.19
N-carbamoyl-L-aspartate_13C(M+4)_posi	5233.44	11422	12372.7	8095.38	5710.78	13315.7	18083.5	10471.5	14790.6	9516.98	9998.5	29038.5	33787.8	17137.9	11897.2	17606.8	12372.6	17133.8	40927.9	32837.5	42355	11896.8	20939.9	19989.7	26648.3	88503.3	98422.1	82326.9	12372.6	12371.5	9993.71	11420.8	92772.1	123316	147006	18688.7	8089.28	19989.1	24873.8	74719.3	177977	90024.4
N-carbamoyl-L-aspartate_posi	11476.5	14244.3	20023.3	27091.8	22844.9	19510.9	15688.9	27126.1	13850.6	21891.2	22840.7	11881.3	29035.3	25220.9	14751.1	15236.4	14277.1	10246.1	25460.9	22376.7	28054.1	24203.4	28329.4	26651.7	32471.8	29970.9	26645.2	32838.6	24271.4	15919.6	15260	17088.2	18520.2	18586	13323.3	17127.4	N/A	7613.7	16376	16058	9045.86	12755.7
O8P_O1P_13C_nega	N/A	N/A	N/A	N/A	705915	678921	626017	274481	229147	N/A	N/A	487572	529906	577157	N/A	N/A	N/A	N/A	8360.36	119525	143947	4695.47	N/A	N/A	N/A	379902	14774.3	381813	6010.56	N/A	N/A	N/A	360990	500809	445540	N/A	N/A	N/A	N/A	1.31873e+06	1.10309e+06	1.18818e+06
O8P_O1P_nega	1.04747e+06	951207	1.04811e+06	1.04249e+06	673154	674347	568247	677007	768790	742790	782443	333735	362312	378317	130994	113059	128996	172056	67086.9	61389.9	79587.5	373972	424024	424947	484892	374808	328892	291221	587545	566874	500511	643755	172527	269133	244419	1.2289e+06	1.34072e+06	1.21969e+06	1.27199e+06	526167	638477	615160
OBP_13C_nega	194869	1.32883e+06	1.461e+06	1.10553e+06	601713	547014	440774	351063	1.25315e+06	936877	1.17609e+06	486748	560906	583551	204492	1.94209e+06	2.31188e+06	2.34767e+06	663704	627790	848762	233604	1.04467e+06	2.44635e+06	1.86473e+06	1.04418e+06	929393	805669	168381	1.16869e+06	889103	1.30955e+06	709560	609288	679222	269415	709235	1.0818e+06	917390	645909	721665	722156
OBP_nega	93420.8	118486	114877	113185	65317.4	70518.8	52825.1	185487	192559	190895	191390	62095.4	78578	63624.4	30679.9	20562.4	27291.4	38763.5	31764	24944.1	48111.5	68810.4	73299.9	84777.5	87991.8	73705.1	74975.1	69750.6	72007.4	61661.2	73887.4	61481.7	74061.6	50560.1	55457.8	92372.6	89734.6	81261.7	106495	45655	54229.6	51755.5
ornithine_posi	95639.1	84712.3	61370.6	62044.7	84241.1	88525.5	79870.9	143397	108505	148448	97528.6	191785	196520	175607	78973.9	65683.1	65699.5	78016.8	79415.3	94574.1	82736.1	94345.4	107540	96225.9	88020.2	108353	104576	86136.6	380671	125991	154534	210836	350405	318501	322467	35921	27756.8	58293.4	36283.9	60917.4	71387.4	73865.9
phosphoenolpyruvate_13C_nega	182414	124370	145278	141355	394955	360654	422271	757073	791531	836906	555665	761689	1.15316e+06	982649	146207	146913	157595	183422	136501	170753	168938	206417	215110	303906	449391	472199	426595	475205	220814	225897	383948	252595	1.08564e+06	705845	522158	274649	338991	296128	253007	894515	509347	1.34701e+06
phosphoenolpyruvate_nega	290178	310981	346473	372340	6068.21	9279.67	13685.9	683467	581136	728874	439095	14649.9	14631.9	6075.26	135179	123702	138353	119865	7563.61	13802.3	6589.33	423509	449243	525865	665021	8319.91	10072.7	14769.8	663618	1.24045e+06	1.46414e+06	1.06239e+06	27183.1	11565.7	12647	956987	294337	1.10206e+06	616428	12166.7	13002.9	4973.59
proline_13C(M+5)_posi	185585	4.73829e+06	3.87179e+06	4.3661e+06	248402	303712	346484	317027	3.18926e+06	2.99687e+06	3.10272e+06	451652	384709	430638	232236	2.2432e+06	2.38889e+06	3.20536e+06	321705	284594	260278	346938	656160	758600	821726	572522	497337	433067	446398	1.11122e+07	9.8261e+06	1.1017e+07	690423	596672	863287	193116	1.46345e+07	1.55821e+07	1.87961e+07	556675	676361	433560
proline_posi	5.29227e+06	733594	759852	907967	4.51316e+06	4.83913e+06	4.35269e+06	3.97631e+06	803480	920968	636810	3.55442e+06	2.8912e+06	2.78028e+06	3.06079e+06	1.14393e+06	1.06807e+06	1.55887e+06	3.29191e+06	2.75643e+06	2.41578e+06	1.17521e+06	210792	283977	345860	964359	945500	552829	1.88488e+07	3.18888e+06	3.50005e+06	4.03076e+06	1.32426e+07	1.39551e+07	1.2828e+07	2.5704e+07	3.83757e+06	4.93758e+06	4.5072e+06	1.6779e+07	2.25923e+07	1.82056e+07
pyruvate_13(M+2_1)_nega	N/A	11422.4	30500.9	21049.6	4520.67	6271.77	N/A	N/A	31655.1	35004.9	31068.7	N/A	4708.09	20432.4	N/A	28734.9	11093.3	30872.9	31888.5	14334.5	27978	N/A	45458.9	28999.4	31733.1	6355.93	15430.3	6062.65	N/A	38811.4	36277.3	57015.9	27863.9	23350.1	19973.3	6091.86	40311.3	43455.1	40401.3	17111.2	20349.5	19474
pyruvate_13(M+2_2)_nega	143049	N/A	N/A	N/A	N/A	94489.3	113675	N/A	N/A	N/A	N/A	217522	93340.9	125215	177904	N/A	213801	N/A	85661.3	104556	161911	N/A	127850	612185	N/A	105129	79746.6	82075.6	N/A	N/A	N/A	N/A	64029.9	191546	124627	N/A	153967	N/A	N/A	178939	129444	165621
pyruvate_13(M+3)_nega	4810.49	37147.5	56358.6	51405.3	14910.5	N/A	18902.8	N/A	58561	41359.6	50696.9	34868.5	10705.1	13527.6	N/A	58854.8	70096.5	35198.4	24367.8	24835.2	23634.9	8821.01	68963.2	50757.3	52134.5	31484.2	35276.3	21547	23199.5	69049.6	63101.3	72699.5	38957.6	25285.1	N/A	N/A	66096.2	87547.9	54940.5	25811.9	16564.5	17406.9
pyruvate_nega	11918.2	N/A	N/A	N/A	13268.7	9250.32	4242.32	16728.9	N/A	N/A	7111.67	4889.25	11134.3	10418.3	11422.7	N/A	N/A	N/A	12152.2	8078.98	9916.08	11760.4	5266.77	6140.55	N/A	11513.8	7200.75	18428.2	18866.2	9601.41	10651.7	7843.63	27111	17875.5	16026.3	23619	N/A	N/A	N/A	12930.7	13047.4	6500.34
ribose-5-phosphate_13C_nega	7842.95	73620.9	64427.7	81024.6	1.39608e+06	1.69327e+06	1.67281e+06	8115.18	62013.9	39565.2	40926.5	1.72137e+06	1.95089e+06	1.96645e+06	9300.05	93881.8	107079	100270	1.30598e+06	673744	1.52828e+06	8036.22	68870.4	61042	67818.1	823098	937203	576850	24659.7	160974	189166	159703	892244	1.24451e+06	809693	8410.46	52742.8	45518	47118.8	5.20714e+06	4.74546e+06	6.3428e+06
ribose-5-phosphate_nega	1.93699e+06	1.59992e+06	1.76482e+06	1.61156e+06	54141.6	37249.5	54218.1	2.12977e+06	1.77299e+06	2.22546e+06	1.91207e+06	125716	106994	86464.6	835144	1.24595e+06	1.09349e+06	2.34935e+06	50923.5	38621.9	31619.6	977594	1.44625e+06	2.0371e+06	2.00987e+06	49416.8	51762.1	37660.1	1.15762e+06	1.44095e+06	1.55073e+06	1.40146e+06	43449.4	65830.5	59855	4.91087e+06	4.22402e+06	4.63711e+06	4.36108e+06	46869.8	50322	78056.2
Sedoheptulose 1,7-bisphosphate (SBP)	234988	349433	337587	332087	125200	110884	110928	568056	499368	619839	630131	69530.7	51385.3	40512.6	52466.2	112054	112673	104570	22295.3	30842.1	31895.1	257268	310733	265496	335372	57721.7	80428.9	24056.1	313727	413077	342100	383744	88505.1	61975.9	62349.2	234557	217394	112157	167958	52022.6	73383.8	70839.3
Sedoheptulose 1,7-bisphosphate (SBP)_13C_nega	161793	176360	217178	256475	284546	307757	251608	254239	139391	38242.8	128596	580525	620263	518296	73636.2	103821	87090.9	51414.5	82780.1	118278	105493	132324	91087.7	97958	76019.4	328916	283119	310652	132972	55596.3	37662.1	55051.1	111868	400470	303414	293241	90303.8	119926	44914.8	162932	413985	144545
sedoheptulose-7-phosphate_13C_nega	11176.8	9375.15	19627	23391	1.05835e+06	1.19344e+06	978263	23440.7	10228.4	18879.2	11024.3	1.67817e+06	1.36847e+06	1.84938e+06	26755.1	9520.22	8170.84	7658.64	354350	357549	413554	28793.1	13264.9	17123.7	18508.7	852679	775504	602782	18469.7	9497.05	24544.9	14224.3	1.55507e+06	612524	567020	16121.4	9613.15	26053.5	8561.53	1.25961e+06	783085	1.01133e+06
sedoheptulose-7-phosphate_nega	1.27629e+06	1.38135e+06	1.16555e+06	1.22842e+06	164543	139204	129727	1.96352e+06	2.09331e+06	2.163e+06	1.94157e+06	241820	216611	281807	386738	439965	416691	504507	29525	44617.6	30626.1	940766	760377	832956	951021	86311.2	82820.6	74240.4	1.00801e+06	651556	777346	650743	107067	129615	121116	921906	1.01444e+06	2.10595e+06	672186	83151.8	50122.3	57540.7
serine_13C_posi	N/A	N/A	N/A	N/A	N/A	N/A	N/A	N/A	N/A	N/A	N/A	162057	185792	159935	N/A	N/A	N/A	N/A	129926	119542	99595	N/A	N/A	N/A	N/A	990124	800851	829555	N/A	7138.69	4283.07	4996.98	873084	957511	986423	N/A	N/A	N/A	N/A	254112	308027	228739
serine_posi	6.90175e+06	6.44487e+06	6.40745e+06	5.77159e+06	6.62591e+06	7.17938e+06	6.14514e+06	1.09327e+07	1.03826e+07	9.83563e+06	1.05528e+07	9.87489e+06	9.58688e+06	1.0158e+07	7.66619e+06	7.29464e+06	6.00189e+06	7.48371e+06	5.91714e+06	7.29761e+06	6.54206e+06	9.94539e+06	9.19476e+06	8.8044e+06	8.55807e+06	9.26681e+06	7.67925e+06	6.89177e+06	1.03289e+07	1.04472e+07	8.84596e+06	1.029e+07	6.63783e+06	8.52906e+06	8.37449e+06	5.58019e+06	5.35984e+06	5.38605e+06	6.01538e+06	3.37621e+06	5.01275e+06	4.49275e+06
shikimate-3-phosphate_13C_nega	N/A	N/A	N/A	N/A	N/A	N/A	N/A	N/A	N/A	N/A	N/A	N/A	N/A	N/A	N/A	N/A	N/A	N/A	N/A	N/A	N/A	N/A	N/A	N/A	N/A	N/A	N/A	N/A	N/A	N/A	N/A	N/A	N/A	N/A	N/A	N/A	N/A	N/A	N/A	N/A	N/A	N/A
shikimate-3-phosphate_nega	N/A	N/A	N/A	N/A	N/A	N/A	N/A	N/A	N/A	N/A	N/A	N/A	N/A	N/A	N/A	N/A	N/A	N/A	N/A	N/A	N/A	N/A	N/A	N/A	N/A	N/A	N/A	N/A	N/A	N/A	N/A	N/A	N/A	N/A	N/A	N/A	N/A	N/A	N/A	N/A	N/A	N/A
sn-glycerol-3-phosphate_13C_nega	N/A	N/A	N/A	N/A	235453	191217	156671	N/A	N/A	N/A	N/A	3.42804e+06	3.63274e+06	3.99273e+06	N/A	N/A	N/A	7850.82	511543	416244	627002	N/A	N/A	N/A	N/A	1.00743e+06	976009	626025	N/A	N/A	N/A	N/A	1.92205e+06	1.03371e+06	1.12081e+06	N/A	N/A	N/A	N/A	971079	662542	1.25704e+06
sn-glycerol-3-phosphate_nega	625375	366116	382448	464068	249140	228240	210173	2.87941e+06	3.41729e+06	3.50988e+06	1.97921e+06	452837	452456	489211	547531	520354	624695	606770	214392	199562	237737	868236	815268	1.19116e+06	2.03443e+06	239343	222601	198359	710931	700398	1.55784e+06	728081	394126	305682	344486	1.25926e+06	1.24667e+06	1.25886e+06	892003	278292	228277	199643
succinate_13(M+4_3)_nega	N/A	4.03716e+06	4.32095e+06	4.20416e+06	66652.8	74950	101942	11046.5	331140	372633	446142	19091.8	13476.7	5291.96	N/A	252719	325441	217867	14752.5	12849.9	19982.1	N/A	875639	774466	786523	32624	19344.6	21828.3	N/A	573788	509023	546463	35105.3	33583.1	32440.2	N/A	1.4281e+06	1.13615e+06	1.32218e+06	49963.1	57100.9	44223
succinate_13C(M+2_2)_nega	29285.6	334538	399133	322506	441611	400334	378617	9514.06	31042.9	54663.6	38263.4	32968.9	45998	48523.4	5081.77	80513.8	61699.9	39136.8	61502.1	52466	70639.3	17093.8	116801	67809.4	92916.9	111317	101177	90427.9	10182.1	83121.1	109570	107156	60410.7	51292.2	73756.9	16929.9	176084	141412	179367	147733	161621	153482
succinate_13C(M+3_2)_nega	N/A	115178	139464	136485	119979	118248	114184	N/A	14300.8	22037.2	14030.6	20361.9	9638.77	10990.6	N/A	17128.2	16684.6	18034.1	35708.8	24751.7	31049.9	3795.51	42927.8	20529.2	29175.5	43320.2	75344.7	64305.3	N/A	30439.7	22019.7	31395.9	58743.4	47573.1	60440.4	N/A	59959.5	58969.3	54191.8	80575.6	73655.6	76781.6
succinate_13C(M+3_3)_nega	N/A	207677	149542	197928	59932.6	44249.2	53330.6	N/A	17751.2	27548.2	28034.5	46605.9	6340.22	32356.8	N/A	5234.42	22840.9	15775.3	10958.2	5254.52	29050.6	N/A	51664.6	30457	46597.9	271746	316963	N/A	N/A	34655.2	20356.8	30005.7	118041	147980	23807.6	N/A	75612.2	62843	59417.2	29700.8	38644.1	17348
succinate_nega	5.97625e+06	860409	1.00075e+06	886451	5.08228e+06	4.74315e+06	4.13652e+06	663268	693720	827921	822241	835066	909953	1.00428e+06	600924	1.06618e+06	1.0791e+06	1.08947e+06	1.48761e+06	1.32385e+06	1.50097e+06	1.72161e+06	901508	878857	829308	1.47157e+06	1.63182e+06	1.50955e+06	1.07846e+06	1.2801e+06	1.27317e+06	1.36002e+06	1.43193e+06	1.63847e+06	1.3652e+06	2.39068e+06	1.50102e+06	1.37941e+06	1.58714e+06	2.46307e+06	2.56663e+06	2.15479e+06
succinyl-CoA_13C(M+4_1)_posi	N/A	3804.69	N/A	N/A	N/A	N/A	N/A	5236.76	N/A	N/A	N/A	N/A	N/A	N/A	N/A	N/A	N/A	3808.5	N/A	N/A	N/A	7135.75	N/A	7138.65	N/A	N/A	N/A	N/A	20458.2	25223.1	N/A	14752.2	N/A	N/A	N/A	8565.3	N/A	N/A	N/A	N/A	N/A	N/A
succinyl-CoA_13C(M+4_2)_posi	N/A	N/A	N/A	N/A	N/A	N/A	N/A	N/A	N/A	N/A	N/A	N/A	N/A	N/A	N/A	N/A	N/A	N/A	N/A	N/A	N/A	N/A	N/A	N/A	N/A	N/A	N/A	N/A	N/A	6649.44	N/A	10457.4	N/A	N/A	N/A	N/A	N/A	N/A	N/A	N/A	N/A	N/A
succinyl-CoA_13C(M+4_3)_posi	N/A	4760.11	N/A	N/A	N/A	N/A	N/A	N/A	N/A	N/A	N/A	N/A	N/A	N/A	N/A	N/A	N/A	N/A	N/A	N/A	N/A	N/A	N/A	N/A	N/A	N/A	N/A	N/A	N/A	N/A	N/A	6187.68	N/A	N/A	N/A	N/A	N/A	N/A	N/A	N/A	N/A	N/A
succinyl-CoA_13C(M+4_4)_posi	N/A	N/A	N/A	N/A	N/A	N/A	N/A	N/A	N/A	N/A	4283.16	N/A	N/A	N/A	N/A	N/A	N/A	N/A	N/A	N/A	N/A	N/A	N/A	N/A	N/A	N/A	N/A	N/A	N/A	9518.46	N/A	4758.98	N/A	N/A	N/A	N/A	N/A	N/A	N/A	N/A	N/A	N/A
succinyl-CoA_posi	6667.89	N/A	N/A	N/A	N/A	N/A	N/A	7138.51	N/A	N/A	N/A	N/A	N/A	N/A	N/A	6201.2	11421.8	11421.9	N/A	N/A	N/A	22362.8	9970.04	14275.9	9514.85	N/A	N/A	N/A	48438.2	80421.7	35222.6	45194	6663.1	12374	5720.9	43074.2	N/A	N/A	20463.7	N/A	16658.9	11420.4
thymidine_13C_nega	49983.7	58178.6	81687.5	64960	57407.3	35542.2	30737.2	28194.2	23910.2	15323.7	17498.1	22058.9	31369.5	27952	30693.5	31714.1	31054.3	33533	39969.9	38188.8	39619	26388.3	32263.8	24453.4	33147.1	52366.1	65540.6	54046.9	25595.2	29202.8	22520.1	25326.8	22521.6	22538.3	23200.3	22129.7	32493	35415.9	22810.2	17714.4	32836.8	18489.4
UDP-N-acetyl-glucosamine 13C8_nega	N/A	N/A	N/A	N/A	6781.63	7491.2	5353.87	N/A	N/A	N/A	N/A	47475.5	48185.4	49256.3	N/A	N/A	N/A	N/A	11778.5	12492.4	12849.4	N/A	N/A	N/A	N/A	19631.1	13920.2	19989.5	N/A	N/A	N/A	N/A	135989	137418	155981	N/A	N/A	N/A	N/A	41046.2	39619.9	57109.7
UDP-N-acetyl-glucosamine_13C6_nega	N/A	N/A	6076.55	N/A	13563.1	10707.7	13563.1	N/A	11421.9	9279.51	7495.6	71743.3	54253.3	58179.6	N/A	N/A	N/A	N/A	10707.7	9279.81	N/A	N/A	9280.06	9280.11	8209.53	11778.7	20344.9	14990.9	N/A	23192.1	22129.5	17489.4	138488	162045	177033	N/A	N/A	3673.11	6424.83	39618.7	63891.3	42118.3
UDP-N-acetyl-glucosamine_nega	167758	26055.4	22843.5	22127.6	N/A	N/A	N/A	678524	238780	211667	219157	118859	113849	127068	103504	27841.4	31751.4	31762.3	N/A	N/A	N/A	358711	37120.2	68172.6	48543.4	N/A	N/A	N/A	1.10361e+06	381193	353014	369418	98866.7	103866	113506	502566	110294	117422	121715	43187.9	39619.8	38906.2
Urea	36870.1	52858.6	26877.5	94067.7	65082.8	36620.4	25570	4786.1	35724.4	29639.9	26225.9	17251.8	14354.2	14056.8	N/A	57702.4	N/A	N/A	18134.2	71468.2	16370.1	47124.9	27868.6	39900	56895.1	28430.3	22989.5	57817.8	26307.1	37075.5	N/A	8286.53	27087.5	60357	50693	N/A	24520.8	36985.8	10810.9	24457.1	32592.6	56068.6
Urea_13C	4375.26	9134.45	7860.05	5970.66	20343.6	11701.3	40695.2	21656	22261.8	12592.5	4824.36	31042.6	29624.7	26574	7068.19	6251.18	16689.3	10045.4	N/A	49840.6	6135	16177.2	15426.1	15852.5	14513	52963.9	34180.9	54702.7	9844.15	9394.11	23607.4	9436.03	33481.8	61446.3	54732.6	20640.7	25151.2	14147.7	14071.8	15949.3	31175.7	23739.5
uridine_13C_nega	N/A	N/A	N/A	N/A	N/A	N/A	N/A	N/A	N/A	7818.96	4282.43	N/A	N/A	N/A	N/A	7572	N/A	N/A	6179.19	17492.2	N/A	N/A	7755.72	N/A	N/A	N/A	N/A	17665.9	N/A	N/A	N/A	3802.52	7509	10157.9	8004.41	N/A	5079.52	N/A	7225.05	6996.58	N/A	N/A

## Sheet: labeled shGOT1
	Tu8902 12C-Gln [-dox]	Tu8902 U13C5-Gln [-dox]#1	Tu8902 U13C5-Gln [-dox]#2	Tu8902 U13C5-Gln [-dox]#3	Tu8902 U13C5-Gln [-dox]#4	Tu8902 12C-Gln [+dox]	Tu8902 U13C5-Gln [+dox]#1	Tu8902 U13C5-Gln [+dox]#2	Tu8902 U13C5-Gln [+dox]#3	Tu8902 U13C5-Gln [+dox]#4	Tu8902 12C-Glc [-dox]	Tu8902 U13C6-Glc [-dox] #1	Tu8902 U13C6-Glc [-dox] #2	Tu8902 U13C6-Glc [-dox] #3	Tu8902 U13C6-Glc [-dox] #4	Tu8902 12C-Glc [+dox]	Tu8902 U13C6-Glc [+dox] #1	Tu8902 U13C6-Glc [+dox] #2	Tu8902 U13C6-Glc [+dox] #3	Tu8902 U13C6-Glc [+dox] #4	DLD 12C-Gln [-dox]	DLD U13C5-Gln [-dox]#1	DLD U13C5-Gln [-dox]#2	DLD U13C5-Gln [-dox]#3	DLD U13C5-Gln [-dox]#4	DLD 12C-Gln [+dox]	DLD U13C5-Gln [+dox]#1	DLD U13C5-Gln [+dox]#2	DLD U13C5-Gln [+dox]#3	DLD U13C5-Gln [+dox]#4	DLD 12C-Glc [-dox]	DLD U13C6-Glc [-dox] #1	DLD U13C6-Glc [-dox] #2	DLD U13C6-Glc [-dox] #3	DLD U13C6-Glc [-dox] #4	DLD 12C-Glc [+dox]	DLD U13C6-Glc [+dox] #1	DLD U13C6-Glc [+dox] #2	DLD U13C6-Glc [+dox] #3	DLD U13C6-Glc [+dox] #4
1,3-diphosphoglycerate 13C(M+3)_nega	N/A	6245.74	13438.1	N/A	N/A	3402.64	N/A	7199.54	3358.84	5279.49	6720.5	N/A	6813.85	12977.3	9323.77	26403.5	30224.5	26811.7	12957.7	15357.7	12957.7	3839.81	N/A	5276.63	N/A	5279.46	2399.85	N/A	9117.84	15832.8	N/A	13409.7	16315.2	N/A	11034.5	2879.65	5275.84	21597.7	9113.2	N/A
1,3-diphosphoglycerate_nega	20753.7	61907.1	35993.4	20064	38345.1	25180	38834.9	16018.8	21627.8	58193.2	48330.2	1.95161e+06	2.7185e+06	2.39947e+06	2.5505e+06	34960.4	4.8745e+06	4.00443e+06	4.18595e+06	3.22564e+06	17331	30709.2	4567.45	29168.1	18002.3	N/A	20904.8	23482.8	28051	64062.8	11555.7	5.57806e+06	3.85896e+06	4.76797e+06	4.58837e+06	16701.7	3.60027e+06	5.39935e+06	4.83076e+06	4.86075e+06
2,3-Diphosphoglyceric acid_13C_nega	N/A	N/A	N/A	N/A	N/A	N/A	N/A	N/A	N/A	N/A	N/A	7939.2	8261.94	6842.27	18356.7	N/A	10491.5	16190.5	7784.82	N/A	N/A	N/A	N/A	N/A	N/A	N/A	N/A	N/A	N/A	N/A	N/A	14936	13157.6	13677.6	N/A	N/A	9704.76	7458.95	9716.61	13708.2
2,3-Diphosphoglyceric acid_nega	N/A	20516.2	7490.04	15788.4	31987.9	N/A	12486.3	4789.11	7471.25	5561.34	8502.14	10781.2	17717.4	N/A	9453.84	22314.2	12214.3	13452.7	12426.9	18895.7	8120.18	9591.48	6331.94	N/A	9576.79	11303.4	N/A	N/A	7615.02	28301.8	9293.3	8980.37	13403	14392.6	12147.3	7451.48	11516.8	11669.4	17581.2	10688
2-hydroxyglutarate_nega	4.14771e+06	3.66405e+06	3.30883e+06	3.63203e+06	3.82022e+06	4.01494e+06	938756	1.35736e+06	982849	1.14233e+06	4.16618e+06	2.38163e+06	3.27494e+06	2.65633e+06	2.85461e+06	5.23881e+06	5.09441e+06	4.40693e+06	4.69176e+06	4.14544e+06	1.20873e+07	2.51471e+06	3.43601e+06	903781	3.61665e+06	1.47908e+07	7.40057e+06	7.15161e+06	6.85131e+06	9.88829e+06	1.26159e+07	1.27322e+07	1.04779e+07	1.04445e+07	9.06426e+06	1.13233e+07	9.73883e+06	1.38897e+07	1.25407e+07	1.34278e+07
2-hydroxyglutrate_13C(M+5)_nega	N/A	1.25589e+06	1.05741e+06	1.07305e+06	1.31771e+06	N/A	932445	1.24044e+06	897229	1.13318e+06	N/A	49268.6	76884.9	67118	51085.7	9616.61	30249.4	16287.4	37120.3	15366	4111.09	3.66781e+06	4.90176e+06	628969	5.80468e+06	3184.5	8.30404e+06	8.19492e+06	7.97097e+06	1.06224e+07	12480.1	271309	225104	185202	192376	N/A	402130	489176	432590	413281
3-phosphoglycerate_13C_nega	6469.96	17996.8	N/A	3587.82	10798	7225.48	N/A	N/A	N/A	11157.1	15117.4	354211	607217	476625	492544	5406.45	863533	785321	807225	645319	N/A	6837.1	6110.74	5774.55	3958.99	N/A	N/A	N/A	N/A	12931.1	N/A	779483	581404	586656	554596	N/A	465085	760934	701893	857731
3-phosphoglycerate_nega	578611	776988	730364	1.01021e+06	835415	639742	423967	712263	518280	590284	585394	23633.6	24043.2	16344.9	24438	825723	91815.5	90056.8	60704.3	40820.9	410280	198310	380960	182258	295345	570946	586288	605720	575372	804951	601525	78872.5	63898.6	47134.9	56135.5	307908	48272.1	102685	50907.7	68673.2
3-phosphohydroxypyruvate_13C_nega	8277.38	8278.55	10078	9712.06	11336.5	6852.56	N/A	6118.93	11518	8998.57	N/A	N/A	N/A	N/A	N/A	8638.49	5758.99	N/A	N/A	N/A	N/A	N/A	8261.84	N/A	N/A	7558.69	5036.04	5756.14	9718.3	11518.5	17640.8	7918.65	N/A	N/A	N/A	N/A	N/A	10798.1	7915.45	9718.45
3-phosphohydroxypyruvate_nega	6688.8	N/A	N/A	N/A	N/A	N/A	N/A	N/A	N/A	N/A	4319.22	N/A	N/A	N/A	N/A	N/A	N/A	N/A	N/A	N/A	N/A	N/A	N/A	N/A	N/A	4319.96	N/A	N/A	N/A	N/A	N/A	N/A	N/A	N/A	N/A	6578.9	N/A	N/A	N/A	N/A
3-phospho-serine_13C_posi	N/A	N/A	N/A	N/A	N/A	N/A	N/A	N/A	N/A	N/A	N/A	N/A	N/A	N/A	N/A	N/A	N/A	N/A	N/A	N/A	N/A	N/A	N/A	N/A	N/A	N/A	N/A	N/A	N/A	N/A	N/A	14037.3	11549.4	11873.8	9633.77	N/A	11513.8	13317.6	8278.48	12237.8
3-phospho-serine_posi	N/A	N/A	N/A	N/A	N/A	N/A	N/A	N/A	N/A	N/A	N/A	N/A	N/A	N/A	N/A	N/A	N/A	N/A	N/A	N/A	35969.8	26275	28431.3	7918.52	32303.1	26273.8	25596.7	44207.4	24960.5	33918.7	49553.9	32786.7	27975.9	28047.6	23576.4	14357.5	18390.4	19046.5	13615.9	21667.8
5-phosphoribosyl-1-pyrophosphate_13C_nega	N/A	N/A	N/A	N/A	N/A	N/A	N/A	N/A	N/A	N/A	N/A	32033.5	32125.7	13140.9	37739.9	7357.26	38766.9	42095.4	50371.8	15374.1	3963.07	N/A	N/A	N/A	N/A	8084.01	N/A	5172.3	N/A	N/A	N/A	27361.6	31722.6	37504.8	41392.6	N/A	21541	4811.41	33821.8	21169.2
5-phosphoribosyl-1-pyrophosphate_nega	16160.8	63593	39714.2	50517	48379	8768.22	16884.9	9266.74	13306.5	26852.8	54581.4	N/A	10468.3	5762.78	10437.5	30224.6	10700.8	15995.6	22653.4	18717.4	N/A	18052.1	N/A	8760.45	13326.6	12125.6	49668.7	37288.2	55782.3	50738.2	8505.97	7204.32	8711.72	4314.06	N/A	N/A	11192	10438.8	13880.3	28073
6-phospho-D-gluconate_13C_nega	5361.33	N/A	N/A	N/A	N/A	N/A	N/A	N/A	N/A	N/A	N/A	32103.4	62762.4	48955.3	59376.2	N/A	41771.2	57596.7	43150.6	49048.8	N/A	N/A	3957.75	5759.13	4680.38	6112.08	N/A	5399.02	5403.76	7924.47	N/A	37709.1	37756.2	33566.1	36068.4	6088.07	14024.2	20494.1	25428.2	27718.5
6-phospho-D-gluconate_nega	36701.9	62485.2	69747	73044.2	86845.2	36681.8	34465.3	71171.6	29945.9	55428.2	44272.3	69451.5	91050.9	96578	96423	52912	436042	332430	305000	281468	25940.2	35994.3	22315.6	12598.5	33802.2	19024.7	38513.3	46899.3	44895.3	71986	32992.1	130892	108348	86389.7	74696.8	17276.9	141742	172571	125694	178551
adenine_posi	1.77459e+06	1.89111e+06	1.69637e+06	2.02442e+06	2.09066e+06	2.3609e+06	1.73738e+06	2.36977e+06	1.77967e+06	2.20677e+06	1.457e+06	1.31834e+06	1.59834e+06	1.54059e+06	1.35183e+06	2.922e+06	3.13043e+06	2.58111e+06	2.76822e+06	2.66322e+06	1.63547e+06	1.3076e+06	1.35927e+06	1.59492e+06	1.58677e+06	1.62596e+06	1.60044e+06	1.71318e+06	1.71182e+06	2.41848e+06	1.85742e+06	2.62134e+06	2.2032e+06	2.04006e+06	2.05067e+06	1.45262e+06	1.33983e+06	1.76213e+06	2.23978e+06	1.88257e+06
a-ketoglutarate_13C(M+1_0)_nega	14850	36936.7	17271.1	33088	32634.8	24454.4	44632.2	66208.7	26882.5	40639.4	12478.1	11035.7	11495.1	15345.1	13332.6	27781.2	34578.8	42727.7	18209.3	28925	20437.3	30267.7	40819.7	35994.2	22553	21711.3	37428.6	28792.7	27384.7	68611.5	17695.3	31655.2	28834.1	14267.5	25826.4	12442.6	29345.5	14400.4	24628.1	22435.7
a-ketoglutarate_13C(M+1_1)_nega	247632	154806	162661	159982	146019	229780	73655.8	94236.1	97118.6	111761	249543	172637	194496	170491	228080	316415	236426	253698	211440	180685	197455	96475.6	94063.6	86498.1	152448	318383	161362	208430	196762	221636	231888	243152	252989	216443	232641	202416	247972	265454	278550	277719
a-ketoglutarate_13C(M+2_1)_nega	N/A	9673.94	N/A	7197.08	7196.54	4800.75	N/A	N/A	11993.3	4813.19	N/A	6460.25	11305.8	N/A	19207.7	N/A	12355	N/A	N/A	7195.34	11383.1	N/A	4282.71	N/A	N/A	14481	8160.69	N/A	15456.4	3813.89	5758.15	N/A	20775.7	8045.08	28101.3	3358.32	N/A	N/A	38487.1	17718.8
a-ketoglutarate_13C(M+2_2)_nega	15312.3	18116.2	N/A	21625.5	11497.6	36587	10916.3	17208.6	5312.75	15733.1	18045.8	37355.9	N/A	34086	33287.9	10568.1	N/A	35129.8	43489.8	20907.1	4896.89	6881.48	23152.8	20413.7	36127.5	21914.8	N/A	21931.5	34594.6	17797.4	15902.1	N/A	109662	57454.4	N/A	16625.4	N/A	31432.1	32531.6	76571.2
a-ketoglutarate_13C(M+3_2)_nega	N/A	8636.37	7198.79	7076.26	7674.96	N/A	9609.38	10053.6	5758.19	6719.51	N/A	9584.22	N/A	N/A	4492.81	N/A	N/A	4395.33	6283.89	N/A	N/A	5756.9	6270.81	N/A	N/A	N/A	14018.9	4798.41	7229.04	14536.3	N/A	N/A	N/A	N/A	15274.4	N/A	N/A	N/A	N/A	N/A
a-ketoglutarate_13C(M+3_3)_nega	4877.39	19906.7	23433.7	N/A	20970	N/A	N/A	7642.09	2767.77	9045.32	3677.9	24739.3	14975.8	27595	3578.19	N/A	N/A	3560.03	5803.84	6118.8	3256.13	N/A	23660.3	N/A	2665.22	24791.9	11498.5	32887.3	5549.68	N/A	12889.5	7274.29	12483.5	N/A	N/A	N/A	N/A	3628.3	N/A	7958.91
a-ketoglutarate_13C(M+4_3)_nega	N/A	49102	41637.7	40295.5	47397.5	N/A	54712.7	58562.8	59983.5	68229.8	N/A	N/A	49357.3	45247.4	27151.1	N/A	61003.8	68215.5	76619.3	53285.6	N/A	36481.4	42480.2	41271.8	41779.3	N/A	45431.5	33061.5	60413.2	53957.1	3359.82	64589.4	67135.7	51721.2	83488.3	N/A	19394.3	50864	38019	36272.2
a-ketoglutarate_13C(M+4_4)_nega	8463.9	40643.3	30047.9	31890.4	38659.7	26719.9	18708.3	46130.7	26347.4	27176.2	10460.1	15492.6	9185.92	14153.7	20879.9	N/A	28973.6	43393.3	33335.6	17411.4	13150.5	24521.8	15465.2	18405.1	15853.7	14440	31815.3	19720.2	29912.8	24960.7	N/A	30386.7	35990.1	5178.91	29767.3	N/A	7134.59	19503.5	9160.11	20126
a-ketoglutarate_13C(M+5_5)_nega	N/A	1.17975e+06	979110	1.17569e+06	1.14581e+06	N/A	1.30205e+06	1.84275e+06	1.26726e+06	1.67925e+06	N/A	4316.74	11625.5	N/A	N/A	N/A	6250.13	N/A	N/A	N/A	N/A	1.00804e+06	1.06562e+06	1.15195e+06	1.1037e+06	N/A	1.41635e+06	1.35372e+06	1.2456e+06	1.77667e+06	N/A	N/A	N/A	N/A	N/A	N/A	N/A	N/A	10206.2	N/A
a-ketoglutarate_nega	1.0092e+06	59918.8	77030.1	30974.8	73656.4	1.85864e+06	38146.7	86993.7	121307	47553.5	970914	760221	954038	852823	834502	2.24601e+06	2.16135e+06	1.99316e+06	2.02644e+06	1.74671e+06	1.34401e+06	45477.1	34346.9	58409.2	74826.4	1.1287e+06	74907.3	40994.3	23019.4	177755	1.35298e+06	2.02338e+06	1.63228e+06	1.43703e+06	1.51528e+06	1.01143e+06	970444	1.30268e+06	1.51594e+06	1.4393e+06
alanine_13C(M+3)_posi	N/A	80060.1	63828.4	73907.1	71507	N/A	29275.1	30708.8	27406.8	32153.6	N/A	1.51823e+06	1.69438e+06	1.37724e+06	2.19678e+06	N/A	369867	329453	333967	252916	N/A	9598.43	14397.4	7679.26	6716.39	N/A	21113.3	21116.2	30234	30712.6	N/A	505399	491912	519028	414664	N/A	850837	1.04708e+06	1.07647e+06	1.05187e+06
alanine_posi	2.08239e+06	2.15097e+06	2.13941e+06	2.42717e+06	2.39203e+06	603799	545297	587769	500225	617038	2.6025e+06	452619	557959	467077	486086	809913	519328	436252	536376	467842	523330	371286	393143	305448	413916	939005	1.12661e+06	1.02226e+06	1.0866e+06	1.61759e+06	567888	282328	351546	206522	248673	733198	192508	229163	280087	231240
arginine	5.15137e+06	2.76117e+06	4.20742e+06	4.13286e+06	3.88921e+06	9.00703e+06	5.23979e+06	5.2963e+06	6.01331e+06	4.09193e+06	3.55982e+06	2.50011e+06	3.70002e+06	1.8867e+06	2.86847e+06	8.27404e+06	9.44442e+06	5.44987e+06	9.12165e+06	5.59825e+06	4.30789e+06	2.17729e+06	4.81615e+06	6.50256e+06	5.11932e+06	4.72555e+06	4.25709e+06	5.02681e+06	1.40446e+06	5.77725e+06	5.69474e+06	5.60906e+06	5.57351e+06	3.77761e+06	7.01796e+06	3.97179e+06	3.12207e+06	5.26187e+06	6.12957e+06	5.88628e+06
asparagine_13C(M+4)_posi	N/A	58072	58068	44200	66229	N/A	21759.5	21124.3	18244.4	24468.5	N/A	N/A	4302.21	4317.99	N/A	N/A	N/A	N/A	N/A	N/A	N/A	54249.1	58789.4	11998.7	60463.3	N/A	155478	160755	131496	185000	N/A	5279.53	N/A	N/A	N/A	N/A	9053.86	8138.84	9612.48	9596.34
asparagine_posi	114476	58160.2	49817.2	61920.4	53929.1	83066	27615.6	31033.5	42610.4	24967.1	127570	69022	102413	76095.1	93013.9	76747.2	96507.6	69765.4	64296.4	67797.7	215048	31543.6	29239.6	16453.8	28318.3	342215	94317	100541	80687.9	124628	200973	168080	123130	190951	124423	305960	244025	283942	275996	237844
aspartate_13C(M+1_0)_nega	79182.7	772630	638827	721788	863767	990523	1.01023e+06	1.36683e+06	981728	1.29482e+06	91663	185898	311027	228271	227124	1.57852e+06	1.64584e+06	1.27968e+06	1.40011e+06	1.29916e+06	113726	609299	630652	167827	696372	131507	1.06353e+06	1.311e+06	1.02541e+06	1.41747e+06	118407	396369	307201	308100	272127	90676.7	459194	531035	494198	540864
aspartate_13C(M+1_0)_nega1	11825.8	19925	20572	36355.8	22881.2	85177.2	47401.3	72859.5	49261.2	68178.4	6417.49	8582.48	7816.54	7407.41	16176.9	104998	134249	104346	137596	102450	4068.04	8831.42	25322.3	N/A	17034.2	17800.9	37188.4	43330.1	40354.2	46772.4	11218.4	10155.8	21142.5	17838.2	10035.1	9967.9	11739.8	20842	18716.2	18859.2
aspartate_13C(M+1_1)_nega	4.26859e+06	1.56213e+06	1.6517e+06	1.42999e+06	1.47108e+06	6.66651e+06	2.50402e+06	3.49663e+06	2.73692e+06	3.50793e+06	4.26239e+06	2.57924e+06	3.2895e+06	2.61517e+06	3.20756e+06	8.50021e+06	8.93851e+06	7.84787e+06	8.80211e+06	7.28162e+06	2.64044e+06	1.02948e+06	1.19055e+06	455327	1.22469e+06	3.27033e+06	2.17882e+06	2.11258e+06	2.21192e+06	2.70352e+06	2.89347e+06	3.03023e+06	2.29471e+06	2.54181e+06	2.4872e+06	2.35866e+06	2.73296e+06	3.46384e+06	2.80888e+06	3.35818e+06
aspartate_13C(M+1_1)_nega1	11998.7	29756.4	19196.3	26395	20155.6	96934.4	61431.2	51469.7	36952	64352.9	12957.7	9111.57	11996	6717.86	8157.62	108939	153091	111326	104132	107919	8157.64	12477.8	14391.5	N/A	11994.6	10077.3	33081.3	34068.3	28793.8	44150.3	13435.9	11024	8638.08	12477.7	12729.3	10082.4	13434.1	18237.2	14880.9	14399
aspartate_13C(M+2_0)_nega	N/A	43672.9	41744.1	44633.6	45110.7	9117.58	143974	190537	106536	160767	N/A	45589	42228.8	25433.1	29278.4	15354.9	252907	164599	192448	157453	N/A	36955.4	34068.4	4319.25	37935	N/A	83505.1	58068.9	66228.4	73427.2	N/A	34071.2	25906.2	32158.1	30216.1	N/A	48949.2	52785.5	56129.3	66223.6
aspartate_13C(M+2_1)_nega	27807.8	1.32096e+06	1.08574e+06	1.42859e+06	1.17697e+06	106540	3.91512e+06	5.77421e+06	3.40157e+06	5.01863e+06	32631.2	606351	898823	680127	815332	108942	5.94889e+06	5.1326e+06	5.74155e+06	4.7215e+06	32143.3	1.18371e+06	1.30285e+06	178491	1.47918e+06	40338	2.7947e+06	3.00345e+06	2.63e+06	3.8379e+06	28812.1	1.14225e+06	1.02001e+06	905434	911374	24490.6	1.4562e+06	2.05244e+06	1.66138e+06	1.85057e+06
aspartate_13C(M+2_1)_nega1	N/A	N/A	N/A	7192.29	N/A	N/A	21593.4	21984.1	20153	24474.7	N/A	N/A	4313.08	8636.92	4798.72	N/A	14390.1	6707.81	14395.9	7197.11	N/A	N/A	N/A	N/A	N/A	N/A	N/A	N/A	N/A	6235.95	N/A	N/A	N/A	N/A	N/A	N/A	N/A	N/A	5297.91	N/A
aspartate_13C(M+2_2)_nega	171013	1.24773e+06	1.09836e+06	1.28027e+06	1.16278e+06	499009	3.87774e+06	6.05884e+06	3.86708e+06	4.91383e+06	201065	814932	1.20914e+06	1.08452e+06	967852	626979	7.01693e+06	5.45213e+06	6.76247e+06	4.79915e+06	102367	704586	844657	68307.2	921802	176189	1.99715e+06	2.00921e+06	1.89901e+06	2.88147e+06	161267	1.63042e+06	1.24435e+06	1.20764e+06	1.20955e+06	98820.3	1.72686e+06	2.42611e+06	2.29492e+06	2.40717e+06
aspartate_13C(M+2_2)_nega1	N/A	40330.4	29881.1	47990.7	44153.7	15355.8	147361	200126	183313	121368	N/A	33609.1	35032.8	34553.8	39353.7	15835.1	270651	213085	232271	193380	N/A	27357.5	23035.4	N/A	24959.3	N/A	64787.9	61889.7	68613	82085.3	N/A	37911.8	33554.3	45109.5	33594.7	N/A	44153.3	90225.9	65255.2	66755.6
aspartate_13C(M+3_1)_nega	N/A	14878.9	15830.4	26394.9	17276.3	N/A	159845	154531	128614	147283	N/A	23067	23511.3	14878.3	23511.5	N/A	71501.6	55638.8	70066.8	64308.4	N/A	12958.8	11997.2	N/A	15834.3	N/A	26393.4	15837.4	21598.3	25807.3	N/A	18236.3	21116.9	17275.2	16796.1	N/A	27842.2	34547.8	31294.1	34077.6
aspartate_13C(M+3_2)_nega	N/A	898602	827123	973888	908449	4798.66	4.51373e+06	5.97567e+06	4.36191e+06	5.21914e+06	4799.61	721094	1.03967e+06	826947	934027	9599.01	2.68706e+06	2.29583e+06	2.495e+06	2.06329e+06	5680.91	441680	504559	60947.8	525465	N/A	923505	984832	995910	1.46519e+06	13916.5	929656	898870	780174	768619	N/A	1.31463e+06	1.74902e+06	1.59093e+06	1.66905e+06
aspartate_13C(M+3_3)_nega	220177	1.15552e+06	1.14425e+06	1.21697e+06	1.24628e+06	121617	4.00763e+06	5.09056e+06	3.48393e+06	4.7014e+06	335588	975579	996650	852290	785033	291507	2.04144e+06	1.9053e+06	1.97456e+06	1.62981e+06	290503	880206	915605	497930	1.02466e+06	237910	1.24594e+06	1.22645e+06	1.31041e+06	1.49364e+06	301255	790745	738805	817888	671582	202077	1.16724e+06	1.38192e+06	1.2607e+06	1.39426e+06
aspartate_13C(M+4_2)_nega	N/A	217469	197724	298324	209709	N/A	2.40133e+06	2.68985e+06	1.85728e+06	2.41117e+06	N/A	11995.8	17754.4	16316.7	16796.1	N/A	24956	14883.5	24474.2	15838.4	N/A	159802	175648	13437	172772	N/A	390085	277391	340261	298506	N/A	9595.84	15357.3	19197.4	7678.21	N/A	22076.8	30239.5	19195.2	26345.8
aspartate_13C(M+4_3)_nega	N/A	5.95458e+06	5.44498e+06	6.31663e+06	6.16959e+06	N/A	3.92195e+07	4.73156e+07	3.63466e+07	4.74612e+07	7272.01	440763	719741	539378	594014	N/A	548838	528293	545242	524047	N/A	2.99842e+06	3.78234e+06	293672	4.36637e+06	9953.43	8.22168e+06	7.67288e+06	8.48187e+06	1.21563e+07	N/A	501819	422327	414732	344995	N/A	729798	873735	901557	818699
aspartate_nega	6.65125e+06	1.86789e+06	1.59511e+06	1.72845e+06	1.91643e+06	5.44398e+07	1.28895e+07	1.68088e+07	1.37372e+07	1.67369e+07	7.45479e+06	4.4877e+06	6.33763e+06	5.61785e+06	5.19456e+06	6.58353e+07	6.5687e+07	5.76627e+07	5.83932e+07	5.28849e+07	6.95499e+06	1.10259e+06	1.27263e+06	596486	1.4368e+06	1.20232e+07	3.18287e+06	3.16981e+06	3.23502e+06	4.9425e+06	8.77883e+06	9.67482e+06	8.10343e+06	7.47216e+06	7.65646e+06	8.22152e+06	9.14189e+06	1.17558e+07	1.21724e+07	1.25812e+07
aspartate_nega1	364367	75290.9	100609	84212.7	98895.8	3.48571e+06	639196	955745	630028	718536	409105	211169	348665	268964	274273	4.13018e+06	4.244e+06	3.4556e+06	4.61454e+06	3.64634e+06	331844	52839.2	52613.9	33109.7	66153.2	539499	95196.6	120934	102222	179707	470316	382055	214174	259781	264747	381568	322422	487907	365879	435167
citrate _nega	1.1808e+07	3.52406e+06	2.75553e+06	3.27486e+06	3.18304e+06	1.54777e+07	2.13727e+06	3.4723e+06	2.7502e+06	3.43753e+06	1.54541e+07	1.2361e+06	2.0834e+06	1.2889e+06	1.11563e+06	2.04614e+07	7.28501e+06	6.89052e+06	6.91128e+06	6.85586e+06	1.1713e+07	1.07244e+06	2.00181e+06	1.23913e+06	1.94278e+06	1.64619e+07	3.57711e+06	3.77718e+06	3.28385e+06	5.85605e+06	1.62793e+07	3.41091e+06	4.38477e+06	2.43863e+06	2.05109e+06	1.29587e+07	1.63366e+06	2.5928e+06	3.00553e+06	2.33091e+06
citrate_13C(M+1_0)_nega	488568	762561	613420	622631	723199	558951	198526	367070	295441	227559	553646	157889	253827	235165	204033	736462	645716	454955	587999	424776	471166	245217	389194	81188.7	388397	566098	766808	818187	973995	1.18116e+06	551404	232165	213695	267516	193843	475677	213510	288940	290042	197870
citrate_13C(M+1_1)_nega	392433	1.30041e+06	1.04194e+06	1.20935e+06	1.09516e+06	582376	296967	528698	389646	423445	575847	111267	137423	114627	127173	716481	587421	386861	369123	322979	465567	445240	822183	149257	735827	627827	1.5425e+06	1.28492e+06	1.62899e+06	2.20752e+06	570264	235488	190431	143431	122407	470597	135438	255638	234165	172274
citrate_13C(M+2_0)_nega	161466	2.2233e+06	1.48207e+06	1.47899e+06	1.97398e+06	313505	758769	1.21987e+06	690942	1.14249e+06	215456	3.80319e+06	4.50521e+06	3.42402e+06	4.29951e+06	391089	6.06748e+06	5.02033e+06	5.89273e+06	4.88101e+06	134258	861679	1.1638e+06	194593	1.24309e+06	156263	2.36069e+06	2.07371e+06	2.45419e+06	2.75004e+06	178114	6.85356e+06	3.5192e+06	5.32033e+06	4.73803e+06	153609	4.28522e+06	6.1275e+06	5.81904e+06	5.54617e+06
citrate_13C(M+2_1)_nega	66160	1.08038e+06	693019	979421	907645	40652.9	260103	720416	414618	620588	44048.9	2.90441e+06	4.50057e+06	3.7107e+06	3.60221e+06	45830.5	5.51791e+06	5.53165e+06	5.26019e+06	3.81267e+06	15436.6	395727	573031	67371.6	554663	44631.3	1.20956e+06	1.01927e+06	1.08962e+06	1.47312e+06	34056.8	6.6326e+06	4.60719e+06	4.72118e+06	4.40937e+06	23998.3	4.18734e+06	6.29804e+06	5.55291e+06	4.8744e+06
citrate_13C(M+2_2)_nega	127274	1.88362e+06	953306	1.53312e+06	1.71179e+06	120996	631170	989471	661188	955598	140218	214309	258001	204609	194411	177348	453360	348700	379023	395678	86036	783093	1.12202e+06	134404	1.17082e+06	115344	2.31155e+06	1.80076e+06	1.8788e+06	2.83901e+06	111324	458933	317368	372638	317572	97970.8	221516	358927	344049	324695
citrate_13C(M+3_0)_nega	7663.76	978626	583359	938974	731717	8109.64	470304	758171	526484	799435	N/A	359475	573067	430437	519500	20530.1	732620	647691	618377	511625	4760.93	441768	454328	74351.3	628587	11038.5	878898	909258	1.08117e+06	1.27191e+06	6238.42	849489	689170	486965	580639	N/A	533346	795623	790894	731860
citrate_13C(M+3_1)_nega	11970.5	1.1111e+06	779190	972033	892867	20057.8	547127	858779	605831	699023	10969.6	418323	513738	464401	439368	22817.5	758244	721006	577578	514680	N/A	479802	589998	106311	568556	14390.3	1.0495e+06	1.0265e+06	1.10302e+06	1.41281e+06	14874.8	868978	639588	390456	556017	5693.38	575366	865944	700708	866552
citrate_13C(M+3_2)_nega	9072.5	1.14771e+06	872777	1.1212e+06	800356	N/A	556348	804141	522321	769691	8624.26	241766	354330	213571	275978	7200.9	449691	331131	352311	327072	N/A	540203	495340	74355.9	667634	5755.27	879492	1.05118e+06	1.03007e+06	1.61036e+06	N/A	459431	241381	299693	261443	N/A	275548	455296	429036	479736
citrate_13C(M+3_3)_nega	N/A	401323	218770	342119	277898	N/A	194372	224516	199141	170372	N/A	23538.6	54711.6	41762.4	34552.3	4263.07	73638.8	61932	53589.7	38998.5	4319.26	142476	162172	21213	129043	4800.37	266117	254930	247356	458947	N/A	70549.5	46091.6	36912	37290.7	11037.2	55193.3	90704.3	47668.9	58045.4
citrate_13C(M+4_1)_nega	23519.8	5.58877e+06	4.38698e+06	5.12964e+06	5.71304e+06	43699.7	3.40079e+06	6.79665e+06	3.01104e+06	5.48839e+06	25194.7	1.81747e+06	2.59278e+06	1.85649e+06	2.1449e+06	32634.8	1.61564e+06	1.42672e+06	1.48329e+06	1.42099e+06	50873.7	2.93228e+06	3.34459e+06	727538	4.28816e+06	14522.7	6.21448e+06	6.23086e+06	6.31345e+06	9.09383e+06	18236.1	3.47053e+06	2.42032e+06	2.5341e+06	2.28328e+06	8093.55	2.89373e+06	3.48382e+06	2.61181e+06	3.76785e+06
citrate_13C(M+4_2)_nega	127048	5.16401e+06	3.68614e+06	4.35927e+06	4.85684e+06	276462	2.55847e+06	3.36364e+06	2.60045e+06	3.79227e+06	150529	591827	1.00867e+06	800559	805856	355270	969404	773821	746298	694796	81867.8	2.39511e+06	2.32679e+06	557656	3.19043e+06	93819.5	4.90575e+06	4.87002e+06	4.93059e+06	6.34888e+06	73888.4	1.1682e+06	826036	820971	766674	57457.1	1.00883e+06	1.266e+06	1.08194e+06	1.26669e+06
citrate_13C(M+4_3)_nega	3373.93	4.65646e+06	3.7635e+06	4.4925e+06	4.42404e+06	32634.5	2.73475e+06	4.69092e+06	2.59268e+06	3.3657e+06	8639.14	666036	777740	637636	679489	19583	533892	445069	457960	400917	20113.6	2.25972e+06	2.20789e+06	533671	2.97883e+06	9267.51	5.01178e+06	4.81801e+06	4.90036e+06	6.24546e+06	7676.7	1.04857e+06	503284	707046	650159	14414.8	787531	1.06232e+06	983831	1.04175e+06
citrate_13C(M+5_2)_nega	9446.74	1.26688e+06	1.02506e+06	1.25379e+06	1.19654e+06	26703.1	1.154e+06	1.71674e+06	1.09776e+06	1.68801e+06	25442.3	1.07822e+06	1.42133e+06	1.20731e+06	1.3121e+06	12950.4	537928	522194	563743	483763	6307.42	479663	748011	205827	910377	7198.29	1.15367e+06	1.08883e+06	1.1926e+06	1.49882e+06	5708.06	1.33633e+06	1.19504e+06	1.35688e+06	1.11634e+06	6201.38	1.53704e+06	1.84441e+06	1.82132e+06	1.74244e+06
citrate_13C(M+5_3)_nega	15354.3	242227	173183	235055	210987	23979	243321	353628	223846	280216	20633.7	605016	763007	714990	726727	10078.7	288474	301860	316681	278796	5279.45	94548.8	108502	15357.9	166944	N/A	227514	303184	276410	347457	5275.25	523393	697877	627121	517895	4319.26	847327	878921	964381	1.01871e+06
citrate_13C(M+6_3)_nega	N/A	354532	269845	418877	375060	N/A	549786	809959	502950	699228	N/A	514598	658025	539952	547441	N/A	133895	104803	119019	65054.2	N/A	144960	169889	33114.3	194370	11515.7	289732	299234	272137	408941	N/A	511977	420181	408447	268869	N/A	499961	716147	783866	669546
citrate_isocitrate_13C(M+1_0)_nega	324771	421823	238591	298661	403496	405046	111833	204553	99836.3	205485	350598	86405.9	125678	94628.7	108928	461142	312003	240898	276463	263188	283769	91537.7	208319	33596.5	236995	343581	417802	392746	499863	625726	353121	203961	163170	162691	105843	239970	119007	191082	148092	149156
citrate_isocitrate_13C(M+1_1)_nega	2.17337e+06	3.99449e+06	2.98045e+06	2.94349e+06	3.81871e+06	2.07192e+06	993273	1.62709e+06	913364	999998	2.10872e+06	347799	592987	429423	497820	2.35589e+06	1.11761e+06	1.28401e+06	909556	961215	1.78286e+06	1.27203e+06	1.86244e+06	288877	2.17112e+06	2.21434e+06	4.17738e+06	4.09044e+06	4.44684e+06	5.59019e+06	2.21921e+06	893553	481045	610511	652336	1.94652e+06	473138	829813	686199	687602
citrate_isocitrate_13C(M+2_1)_nega	71991.4	1.69486e+06	1.11248e+06	1.44259e+06	1.5081e+06	141314	562144	903063	478769	877930	94446.9	5.46593e+06	7.17022e+06	5.44429e+06	6.01718e+06	89739.6	1.02542e+07	9.30708e+06	6.89267e+06	7.95982e+06	38865.3	654179	742609	128536	774080	67667.2	1.8834e+06	1.60473e+06	1.81678e+06	2.4485e+06	69572.8	9.78573e+06	7.49757e+06	7.02027e+06	7.93766e+06	46577.9	6.03262e+06	1.0355e+07	6.45859e+06	8.54715e+06
citrate_isocitrate_13C(M+2_2)_nega	310635	4.58226e+06	2.95271e+06	4.45479e+06	3.94894e+06	360871	1.67575e+06	2.1427e+06	1.40307e+06	2.36184e+06	342175	4.83606e+06	6.93826e+06	5.82715e+06	6.46018e+06	336626	9.19489e+06	1.01822e+07	8.61127e+06	8.62645e+06	200160	1.76689e+06	2.6843e+06	320049	2.70873e+06	254216	5.68508e+06	5.15902e+06	5.08363e+06	6.11046e+06	287788	1.10745e+07	8.54532e+06	7.03077e+06	7.38442e+06	224437	6.28647e+06	9.99346e+06	6.13592e+06	9.34164e+06
citrate_isocitrate_13C(M+3_2)_nega	6587.9	1.10731e+06	805380	945362	1.23111e+06	11975.8	583920	1.14935e+06	600484	755758	11999.5	454591	822368	667970	729975	N/A	971820	796705	933060	847525	11519.5	523067	575248	128125	820405	N/A	1.21995e+06	1.16991e+06	1.14067e+06	1.70977e+06	N/A	1.27214e+06	900397	928110	805829	4778.71	885755	1.23546e+06	1.21061e+06	1.21794e+06
citrate_isocitrate_13C(M+3_3)_nega	19197.4	1.83713e+06	1.40497e+06	1.89091e+06	2.0026e+06	26281.5	1.22059e+06	1.99457e+06	988222	1.39224e+06	11996.4	484660	759721	569050	558870	19697.9	943280	805940	807088	789909	28026.4	963860	1.03029e+06	173728	1.36458e+06	19679.3	2.29943e+06	1.95572e+06	1.95034e+06	2.9023e+06	10559.8	1.05008e+06	674256	656688	764417	20636.2	854267	973415	875694	1.01601e+06
citrate_isocitrate_13C(M+4_3)_nega	30705.7	6.21936e+06	5.41589e+06	7.18218e+06	7.88768e+06	48151.4	4.54344e+06	7.20864e+06	4.06814e+06	6.4985e+06	29818.6	2.69632e+06	3.6257e+06	3.03079e+06	3.62088e+06	27682.6	2.14451e+06	2.43445e+06	2.30878e+06	271313	24819.5	2.99823e+06	4.13439e+06	134069	4.85701e+06	20666.8	8.22868e+06	7.59458e+06	7.28042e+06	9.94033e+06	10560	4.36114e+06	666536	3.46454e+06	3.23818e+06	14877.9	3.27867e+06	4.75617e+06	4.45045e+06	5.33651e+06
citrate_isocitrate_13C(M+4_4)_nega	32558.5	5.92739e+06	6.54567e+06	6.77836e+06	7.70728e+06	43737.7	4.6573e+06	7.0077e+06	4.10801e+06	5.9812e+06	39363.2	1.36223e+06	1.96019e+06	1.98237e+06	1.77633e+06	15661.7	270495	1.30805e+06	1.38436e+06	1.12987e+06	51227.4	3.33978e+06	4.21188e+06	859502	5.18196e+06	31296.5	8.25034e+06	8.34721e+06	6.97792e+06	9.74322e+06	17747.1	2.70195e+06	469602	2.3791e+06	2.1741e+06	9285.93	1.82492e+06	2.64439e+06	2.92735e+06	2.66029e+06
citrate_isocitrate_13C(M+5_4)_nega	18716.7	1.88884e+06	1.35509e+06	2.1307e+06	2.26068e+06	15454.4	1.84262e+06	2.97224e+06	1.64823e+06	2.5811e+06	26395	1.77935e+06	2.44183e+06	2.03227e+06	2.52597e+06	25915.9	1.08994e+06	854277	797408	740497	17830.8	801494	1.05068e+06	245172	1.52157e+06	11997.4	1.68088e+06	1.74413e+06	1.65168e+06	2.39696e+06	18658	2.31043e+06	1.88868e+06	2.06776e+06	1.7029e+06	4370.86	2.2438e+06	2.81745e+06	3.15167e+06	3.09729e+06
citrate_isocitrate_13C(M+5_5)_nega	N/A	118526	94119.8	112780	147060	20149.6	27466.1	222168	93441.8	25157.5	N/A	378902	566223	450221	453868	11519.4	230873	186783	168447	152612	N/A	63350.9	75347.8	7686.68	100248	8606.98	31760.2	122597	184490	216435	4321.16	83746.5	456267	399029	407346	N/A	472229	563086	571692	698552
citrate_isocitrate_13C(M+6_6)_nega	9603.47	543784	390374	569432	589210	23516.5	756194	1.30157e+06	904070	897917	9586.51	878134	1.02418e+06	963719	820278	N/A	160307	125775	155495	160154	N/A	180344	205868	43193.2	221741	6718.78	389064	352187	390244	609318	N/A	600175	635741	699053	538893	N/A	821163	1.14585e+06	938337	1.19594e+06
citrate_isocitrate_nega	2.10956e+07	5.41195e+06	3.78857e+06	4.83251e+06	4.12227e+06	2.64887e+07	3.44562e+06	6.14611e+06	4.68865e+06	4.90589e+06	2.74156e+07	1.86639e+06	3.36354e+06	2.62659e+06	2.1319e+06	3.12687e+07	1.47491e+07	1.07268e+07	1.09551e+07	1.08535e+07	2.05469e+07	1.53336e+06	2.93799e+06	1.9292e+06	2.93013e+06	2.57804e+07	4.95495e+06	5.37474e+06	5.4152e+06	9.84139e+06	2.53173e+07	4.97634e+06	6.0882e+06	3.69285e+06	4.09396e+06	2.36162e+07	2.79399e+06	4.3171e+06	4.47367e+06	3.77706e+06
citrulline_13C(M+5)_posi	N/A	N/A	N/A	N/A	N/A	N/A	N/A	6354.17	N/A	N/A	N/A	N/A	N/A	N/A	N/A	N/A	N/A	N/A	N/A	N/A	5664.45	N/A	N/A	N/A	N/A	N/A	N/A	N/A	N/A	N/A	4205.11	N/A	N/A	N/A	N/A	N/A	N/A	N/A	N/A	N/A
citrulline_posi	15323.2	11340.7	8930.76	16440.2	12740.3	18055.5	22252.3	15850.7	25387.2	14899.8	5692.16	7648.12	7167.6	4506.24	11076.1	19038.4	17532.1	16088.8	17076.3	13589.2	10998.7	9805.12	15724	23869.8	11971.2	6532.82	16917.6	10778.9	17957.8	20167.7	12548.9	23431.8	72639.8	19333.8	14538	13060.7	12451.9	12208.9	10511.4	13737.3
deoxyribose-phosphate_13C_nega	29911.1	23247.5	14996.5	39007.4	34413.7	22522.4	22124.5	N/A	17799	23389.4	27900.7	67820.4	79846.7	65045	7488.64	29215.2	38177.8	30891.2	29176.1	18948.3	N/A	12377.3	N/A	18910.8	24227.5	18249.7	21963.7	15134.8	26160.4	37192.9	22846.6	31153.3	39159.6	22972.9	85525.5	23768.8	66947	119379	85207	89500.6
deoxyribose-phosphate_nega	104364	98359.4	121638	128440	132362	121072	48179.6	68406.6	91714.1	108505	86976.8	29900	21170.9	28871.5	13299.8	83913.7	60600	90468.7	62635.1	57096.4	66223.6	55187.5	56203.5	184709	69772	96819.7	130619	124978	123899	128766	89993.5	174339	112835	114275	143198	66245.1	88239.4	30128.6	27765.9	32344.1
D-glucono-?-lactone-6-phosphate_13C_nega	16916.9	10438	N/A	7539.86	8638.17	15719.2	N/A	N/A	N/A	N/A	N/A	23395.9	37432	34533.8	41753	8646.56	71262.7	37466.3	46432.7	35269	6127.48	N/A	N/A	10023.4	N/A	N/A	N/A	10434.1	7920.38	N/A	15108.4	163351	151349	137493	149016	7564.74	197964	213060	221212	250873
D-glucono-?-lactone-6-phosphate_nega	17826.8	20956.6	10732.3	16081.5	16722.3	18434.1	13380.4	24348.3	15039.5	14214.2	17890.5	7429.69	N/A	5673.67	11513.2	18484.8	15772.5	16238.7	11018.9	8002.74	5468.8	8482.44	15246.4	7930.04	11045.5	12524.5	9431.29	12369.1	11101.7	15408	24835	7849.12	3860.81	N/A	6757.07	10354.7	12583.1	N/A	11194.7	12526.4
D-glucosamine-1-phosphate_13C_posi	N/A	N/A	N/A	N/A	N/A	N/A	N/A	N/A	N/A	N/A	N/A	N/A	N/A	N/A	N/A	N/A	N/A	N/A	N/A	N/A	N/A	N/A	N/A	N/A	N/A	N/A	N/A	N/A	N/A	N/A	N/A	N/A	N/A	N/A	N/A	N/A	N/A	N/A	N/A	N/A
D-glucosamine-1-phosphate_posi	N/A	N/A	N/A	N/A	N/A	N/A	N/A	N/A	N/A	N/A	N/A	N/A	N/A	N/A	N/A	N/A	N/A	N/A	N/A	N/A	N/A	N/A	N/A	N/A	N/A	N/A	N/A	N/A	N/A	N/A	N/A	N/A	N/A	N/A	N/A	N/A	N/A	N/A	N/A	N/A
D-glucosamine-6-phosphate _13C_posi	N/A	N/A	N/A	N/A	N/A	4320.41	N/A	N/A	N/A	N/A	N/A	N/A	N/A	N/A	N/A	8278.55	8722.8	7198.62	8998.43	9358.16	N/A	N/A	N/A	N/A	N/A	N/A	N/A	N/A	N/A	N/A	N/A	4676.52	N/A	N/A	N/A	N/A	N/A	7198.74	8278.43	N/A
D-glucosamine-6-phosphate_posi	N/A	N/A	N/A	N/A	N/A	N/A	N/A	N/A	N/A	N/A	N/A	N/A	N/A	N/A	N/A	N/A	N/A	N/A	N/A	N/A	N/A	5399.37	N/A	N/A	N/A	N/A	10438.7	7199.49	16917.1	11158	N/A	N/A	N/A	N/A	N/A	N/A	N/A	N/A	N/A	N/A
dihydroxy-acetone-phosphate_13C_nega	61319.9	98645.2	61879.3	109301	100063	116988	37434.1	68754.5	79148.3	71433.4	77372	2.87681e+06	3.8079e+06	3.06084e+06	3.75343e+06	130646	2.31436e+06	2.23442e+06	2.32841e+06	1.98811e+06	55429.6	82483.7	89479.3	20157	97812	159072	110501	147572	151697	209166	93200.4	5.21268e+06	5.19689e+06	5.16862e+06	4.43897e+06	115901	2.21126e+06	3.33102e+06	3.10046e+06	3.76314e+06
dihydroxy-acetone-phosphate_nega	3.39041e+06	4.66725e+06	4.28752e+06	4.24099e+06	4.65222e+06	1.85425e+06	1.62877e+06	2.10752e+06	1.96171e+06	1.72375e+06	3.54362e+06	72497.5	177997	93448.6	99186.5	1.69167e+06	130585	88390.5	108252	62017.3	3.81686e+06	1.50349e+06	2.01833e+06	333331	2.20545e+06	1.96471e+06	2.7932e+06	2.76057e+06	3.58904e+06	4.14465e+06	4.33657e+06	192916	267305	129122	124808	1.47102e+06	78844.2	111315	186435	94567.5
erythrose-4-phosphate_13C_nega	8148.01	N/A	N/A	N/A	N/A	N/A	N/A	N/A	12695.7	N/A	8882.91	93797.7	111433	107888	128040	N/A	174205	160480	154123	121819	N/A	N/A	N/A	9299.57	N/A	5421.33	N/A	N/A	N/A	N/A	11486.5	158224	148585	177354	140450	N/A	107872	149413	182344	145217
erythrose-4-phosphate_nega	90320.8	174243	128339	195638	160166	136251	127236	179123	144457	119034	129176	20817.2	28979.4	25363.3	31969	192244	34422.7	30310.1	27495	27624.1	133603	145409	144086	31883.4	108189	130498	155555	144183	147810	243213	144795	53835.4	54778.8	41656.1	46630.8	82526.3	10773.8	18549	17917.7	31030.7
fructose-1,6-bisphosphate _13C_nega	115646	59754.1	18620.5	31578.8	21980.3	103440	17083.8	62909.7	27218.9	189731	98549.5	2.85723e+06	3.59092e+06	3.47853e+06	3.89278e+06	129968	7.30919e+06	7.94364e+06	9.02144e+06	6.19845e+06	47811.9	60145.1	42772.1	38044.3	33635.5	68239	15370.3	45869.5	15785.8	28802.3	53485.6	6.9865e+06	5.13158e+06	4.97679e+06	4.98476e+06	45184.1	3.09781e+06	4.09556e+06	2.84934e+06	5.23045e+06
fructose-1,6-bisphosphate_nega	3.86593e+06	4.51221e+06	4.96587e+06	3.99972e+06	4.6473e+06	5.3788e+06	6.02559e+06	9.581e+06	5.20716e+06	8.69e+06	3.32876e+06	102263	181879	132761	137605	5.48463e+06	503464	294922	289439	260337	3.45867e+06	1.31589e+06	2.14588e+06	763230	2.01732e+06	2.63272e+06	4.94945e+06	4.74019e+06	5.87882e+06	5.9661e+06	4.35223e+06	195157	261817	157113	152967	1.41363e+06	210563	146530	151648	125399
fructose-6-phosphate_13C_nega	41438.1	36891.8	36200	46053.3	28851.9	41061	24159.1	36208.7	33707.1	29685.5	37672.6	2.43883e+06	3.21042e+06	2.89372e+06	3.04419e+06	69561.7	6.12503e+06	5.22e+06	4.99886e+06	4.2222e+06	51702.8	29405.2	15164	54377.2	37872.5	30431.5	33664.2	23127.7	31927.6	24498.7	26666.6	6.15282e+06	4.49316e+06	5.8918e+06	5.21833e+06	26051.7	3.57965e+06	5.66718e+06	5.22617e+06	5.45878e+06
fructose-6-phosphate_nega	3.23632e+06	4.51207e+06	3.67847e+06	4.63329e+06	4.6551e+06	3.77484e+06	3.24316e+06	4.5203e+06	3.23654e+06	3.99388e+06	3.40096e+06	129249	239183	150663	155778	6.75548e+06	601217	491504	498090	432824	5.03243e+06	4.37094e+06	4.51294e+06	960065	4.60366e+06	4.39481e+06	5.98627e+06	6.11289e+06	5.91812e+06	7.84297e+06	5.07627e+06	607090	512634	456805	395099	3.41814e+06	384800	493461	654996	481456
fumarate_13C(M+1_0)_nega	65029.9	193461	199725	173745	201712	90348.5	136794	143407	92030.6	124881	68368.6	205609	307413	262673	272981	153527	265345	255450	283189	188121	43327.2	80458.4	108838	32960.7	84477.2	66853.8	176425	207415	199168	232244	69255	295690	268203	272244	291663	49580	220144	223576	375067	268365
fumarate_13C(M+1_1)_nega	229732	666369	642596	744441	684854	361534	374610	381647	231713	291425	315884	320175	381670	289613	310640	468102	643334	583309	639576	572636	151764	249710	280431	N/A	341338	200289	720653	716180	657007	772466	199898	311256	276592	250147	253154	133527	317472	355938	373255	423468
fumarate_13C(M+2_1)_nega	N/A	749071	666004	757668	783858	11026.7	434744	599580	403623	574632	7767.5	523645	584956	751365	645359	7143.74	574908	495494	591087	459859	13408	245235	334975	48407.8	353596	N/A	644692	642981	624703	745961	N/A	531998	445653	497278	417513	N/A	592537	738389	610677	730996
fumarate_13C(M+3_2)_nega	117091	785607	608604	720882	789193	72462.8	724899	856098	624283	806541	126703	599379	626931	598034	616460	93518.7	313382	307559	304759	324751	29039.5	214367	265113	55189.2	289648	29298.6	398178	383805	418123	540143	35030.7	442217	424157	342346	331930	27402.3	521081	586604	610735	600818
fumarate_13C(M+3_3)_nega	297807	1.06938e+06	871481	1.06996e+06	1.07683e+06	269693	1.12026e+06	1.43377e+06	1.02542e+06	1.23664e+06	309468	426206	569550	503620	592814	349583	693571	444342	506546	496091	94695.5	293511	334914	84567.6	399724	109039	676638	613285	619412	715224	67308.7	298921	277140	285460	246411	126827	326267	340696	393575	426242
fumarate_13C(M+4_3)_nega	4786.92	6.27414e+06	5.51148e+06	6.1462e+06	6.10536e+06	N/A	5.93393e+06	7.34396e+06	5.56388e+06	6.8219e+06	5259.37	848871	1.09247e+06	984848	1.13687e+06	7136.02	404499	361119	387599	348194	11028.5	1.8901e+06	2.34326e+06	607133	2.48677e+06	3366.54	3.47589e+06	3.68528e+06	3.91345e+06	4.54988e+06	N/A	352458	314170	298289	310809	13900.1	425315	540925	520537	474582
fumarate_nega	7.13004e+06	1.55049e+06	1.54236e+06	1.53233e+06	1.54636e+06	9.12599e+06	1.46117e+06	1.85562e+06	1.58716e+06	1.9191e+06	7.90817e+06	3.86969e+06	5.59778e+06	4.73578e+06	5.0841e+06	1.14424e+07	9.56092e+06	9.16574e+06	9.14997e+06	8.60797e+06	4.3551e+06	728675	804344	734300	1.10837e+06	5.68339e+06	1.3698e+06	1.34915e+06	1.40356e+06	1.67972e+06	4.8073e+06	4.13302e+06	3.57837e+06	3.50503e+06	3.46409e+06	4.6839e+06	3.65303e+06	4.68755e+06	4.2716e+06	4.37737e+06
Geranyl-PP_13C(M+10)_nega	56999.9	17746	N/A	28266.6	22094.5	303795	134745	264924	114106	368513	84905.6	N/A	12835.8	N/A	24958.3	779312	392511	258214	351066	30115.6	57589.5	15906.4	12948.1	6243.18	15407.6	571516	212582	208278	171010	16662.1	6039.29	16828.4	17276.7	17275.3	N/A	495095	50874.3	48422.6	14603.3	45108.8
Geranyl-PP_13C(M+2)_nega	17290.6	6715.96	25436.9	14878.2	2398.43	5761.28	N/A	5272.82	N/A	7197.35	14391.4	7197.13	5279.38	6192.98	11034.9	13779.4	17253.4	7198.73	15836.2	13916.7	N/A	2879.36	N/A	N/A	5757.43	N/A	7629.04	5757.64	11007.5	18227.8	3839.58	17757.9	9599.69	N/A	5279.59	N/A	3838.23	7197.35	9599.1	6754.32
Geranyl-PP_13C(M+4)_nega	16311	8638.81	N/A	14397.8	11516.6	14877	10078.2	27355.1	11031.5	20152.7	9598.79	5184.16	22556.1	15356.4	19677.9	27841.5	24905	30207.6	30693.1	23988.5	10573.4	N/A	N/A	N/A	N/A	20156.2	9119.37	9121.82	N/A	N/A	17276.5	18279.5	11516.5	4319.25	N/A	6238.23	N/A	4783.44	7679.49	12957.8
Geranyl-PP_13C(M+6)_nega	N/A	N/A	N/A	N/A	N/A	N/A	N/A	N/A	N/A	N/A	6362.87	N/A	N/A	3952.39	N/A	N/A	16367.4	N/A	N/A	N/A	N/A	N/A	N/A	7080.24	N/A	N/A	N/A	N/A	N/A	N/A	N/A	N/A	N/A	N/A	N/A	3875.97	N/A	N/A	N/A	N/A
Geranyl-PP_13C(M+8)_nega	13916.5	16330.4	4681.73	17876	13774.1	21112.3	4746.95	20157.3	12956.2	21361.3	N/A	7677.97	19676.7	4563.33	14397.3	6389.25	27356.9	23875.6	29276.3	24960.5	10071.3	10557.9	N/A	3842.45	N/A	9596.14	12952.3	5877.99	N/A	14398.6	18227.5	13194.9	16319.7	13439.4	29202.1	9120.01	11997.3	12467.5	11036.9	21114.8
Geranyl-PP_nega	309070	528747	408031	401053	487821	58548.4	37917.6	63343.5	36466.6	39379.1	310947	8638.43	19194.2	4809.99	N/A	74868.4	N/A	5759.63	N/A	6235.9	29279.1	5834.67	15836.6	8641.04	5853	46208.4	74863.5	38391.8	50862.3	74883.1	28311.7	6761.89	N/A	8157.61	8594.79	30236.5	N/A	7679.89	12477.4	8638.2
glucosamine_13C_posi	15551	17607.9	28461.6	27917	21194.5	15856.3	11488.3	28118.5	27149.6	20743.3	25958.2	20927.9	14496.1	14255.5	N/A	26618.1	58687.8	36194.9	35418.1	41066.2	11164.4	26791	31391.2	12787.9	29141.2	24854	24172.2	15814.5	41529.3	34174.9	31178.6	22817.7	N/A	N/A	16106.5	21063	19445.4	11961.3	24789.8	31899.5
glucosamine_posi	51114.4	163972	108088	115205	N/A	121812	157637	121997	37519.8	121653	81690	226798	48705.1	144114	19022.5	146904	54068	58576.8	N/A	68330.3	44438.9	268284	223050	66397.5	114601	95120.6	66664.5	85113.8	81964.3	65201.9	65026.1	72213.4	72203.8	110078	63406	96670.7	28781.8	13528.4	39248.4	30436.9
glucose-1-phosphate_13C_nega	28030.1	106061	79989.7	171957	138738	34373	45619.4	68077.8	55221.6	58291.5	9350.62	74192.5	92371.1	92673.7	71490.6	59278.4	206009	152681	154941	124663	38509.6	63321.2	37587.2	41280.1	19954.7	23329.3	78268.8	69353.9	43648.2	119185	7964.94	235976	237634	224641	193753	32492.1	209707	283917	268638	230625
glucose-1-phosphate_nega	416827	35168	406142	396309	451588	354798	172397	346225	221741	264258	421936	21113.4	8060	32289.7	26106.7	523939	325901	31055.9	212590	31451	4.08085e+06	2.54693e+06	2.86852e+06	350524	3.3348e+06	4.69956e+06	5.81721e+06	5.9921e+06	5.98442e+06	8.61367e+06	4.35665e+06	1.35863e+06	1.09379e+06	1.08486e+06	967125	3.67147e+06	1.14839e+06	1.34896e+06	1.41308e+06	1.35236e+06
glucose-6-phosphate_13C_nega	18552.5	2771.84	3179.37	33260.9	31091.7	31272	19010.2	39867.5	25921.5	25886.8	9504.29	7334.22	20163	22079.6	19652.4	31665.5	31706.9	48464.1	8161.67	21479	9002.07	25388.6	24533.1	16749.4	25497.9	17054.5	25413.2	5156.48	36892.2	21393.1	24091.4	41562	14350.7	38466.9	37206.9	19316.7	19146.7	27958.4	5463.98	5215.43
glucose-6-phosphate_nega	268206	337577	295936	373438	324648	252143	205203	340968	193108	289847	277790	N/A	16815	23378.2	N/A	500916	57206.1	16062	67470.3	33804.1	362673	310598	338621	115654	285714	275082	368431	375856	382762	429818	307736	29423.7	32156	44263.6	50201.5	258321	N/A	N/A	25178.9	33039.9
glutamate_13C(M+1_0)_posi	163688	158814	163143	152133	155966	231788	37435	43192.6	39832.6	45113.4	182599	116985	148783	123814	117104	295524	204007	202496	183775	213004	273523	117105	117095	20637.4	136775	278820	329221	249595	249526	408382	316940	308088	186209	249566	171691	200094	164126	273054	258573	248037
glutamate_13C(M+1_1)_posi	733163	1.08797e+06	828977	960121	978692	670374	234343	355201	237237	355232	742853	546886	802908	530224	559460	825783	926300	894598	833347	789178	1.09945e+06	727372	907261	110895	798364	1.09625e+06	1.71968e+06	1.51652e+06	1.62267e+06	2.13042e+06	1.33776e+06	1.13086e+06	986365	813894	914875	799588	942413	1.35272e+06	1.16074e+06	1.12279e+06
glutamate_13C(M+2_1)_posi	36936.1	861924	621243	601713	675673	68617.5	240492	287475	205859	265389	66228.5	86382	123570	76791.3	106066	83499.6	164107	158779	145909	116267	59990.7	534185	666113	103659	651708	59029	1.17239e+06	1.15994e+06	1.32697e+06	1.40811e+06	56144.5	206851	167360	188122	163550	50429.2	143489	249908	215476	209729
glutamate_13C(M+2_2)_posi	56145.1	355284	262823	318190	360233	63312.1	143827	192362	152472	165017	60882.8	3.07846e+06	3.43362e+06	2.60972e+06	2.9283e+06	77738.4	2.08027e+06	1.8361e+06	2.03295e+06	1.79689e+06	84336.4	229868	221635	42526.3	283829	89670	449780	434817	470513	565417	85362.7	5.59467e+06	4.42424e+06	4.5254e+06	4.23032e+06	64815.7	4.67228e+06	6.74461e+06	5.83856e+06	5.54184e+06
glutamate_13C(M+3_2)_posi	N/A	3.48814e+06	2.77894e+06	3.35666e+06	3.18806e+06	3826.99	1.43247e+06	2.02235e+06	1.37291e+06	1.71854e+06	N/A	95028.3	134381	87770.1	114235	5279.55	71725.7	66361.9	63164.4	63471.5	N/A	2.80514e+06	2.93833e+06	304746	4.47133e+06	N/A	5.45901e+06	5.05466e+06	5.52594e+06	7.20463e+06	5279.54	207986	203480	167017	171822	N/A	200584	232745	258823	223565
glutamate_13C(M+3_3)_posi	N/A	107488	88787.4	118062	104154	N/A	62748.5	71528.3	44145.1	66755.6	5762.56	601276	691305	535605	629765	6236.99	264030	238080	238348	183722	7197.24	92103.2	92158	11995.1	98364.6	8638.49	159402	120416	124993	201359	6236.31	1.06122e+06	857650	864794	652235	7678.18	1.05785e+06	1.51959e+06	1.19148e+06	1.20319e+06
glutamate_13C(M+4_3)_posi	N/A	541303	481365	617140	509703	N/A	493415	577939	395072	459739	N/A	624357	847535	823421	726797	N/A	205449	178009	201564	159787	N/A	461650	481320	134355	483358	N/A	783259	685988	692318	871735	N/A	1.04661e+06	1.00103e+06	968921	753982	N/A	1.1515e+06	1.36714e+06	1.42099e+06	1.48391e+06
glutamate_13C(M+5)_posi	N/A	1.02052e+07	1.02972e+07	1.19951e+07	1.21669e+07	N/A	1.09935e+07	1.29436e+07	9.07587e+06	1.18179e+07	N/A	388723	467914	422322	357290	N/A	54698.8	43671.3	50870.6	77745.7	N/A	1.00232e+07	1.08521e+07	3.00141e+06	1.09592e+07	N/A	1.42048e+07	1.35768e+07	1.35224e+07	1.81159e+07	N/A	519267	403594	388245	308576	N/A	669929	693476	680980	645490
glutamate_posi	1.33819e+07	1.8331e+06	1.83471e+06	1.70264e+06	1.71176e+06	1.57638e+07	1.32817e+06	1.72077e+06	1.35526e+06	1.24306e+06	1.39071e+07	7.81782e+06	1.17783e+07	9.89255e+06	8.56882e+06	1.67644e+07	1.74798e+07	1.37579e+07	1.41392e+07	1.41045e+07	1.87454e+07	1.28049e+06	1.34125e+06	955158	1.47334e+06	1.997e+07	2.91405e+06	2.34122e+06	2.76676e+06	4.04387e+06	2.12001e+07	1.73535e+07	1.38596e+07	1.49246e+07	1.24664e+07	1.53343e+07	1.31611e+07	1.72054e+07	1.63796e+07	1.64123e+07
glutamine_13C(M+5)_posi	N/A	2.2371e+07	1.97259e+07	2.13411e+07	2.2592e+07	N/A	2.26258e+07	2.82201e+07	2.22116e+07	2.69414e+07	N/A	8157.47	12091.2	N/A	10963.6	N/A	28318.5	16780.2	22072.9	23856.7	N/A	1.74265e+07	2.07862e+07	1.70984e+07	1.95989e+07	N/A	2.51542e+07	2.22181e+07	2.18674e+07	2.87015e+07	N/A	22403.4	13897.8	11041.7	13487	N/A	10584.4	9578.5	14879	10547.2
glutamine_posi	1.73854e+07	778077	1.30067e+06	865712	861454	2.62427e+07	890611	1.11033e+06	1.53966e+06	1.33611e+06	1.57285e+07	1.48608e+07	1.51689e+07	1.70165e+07	1.27873e+07	2.99437e+07	3.33154e+07	2.7335e+07	2.99633e+07	2.65678e+07	2.09664e+07	513388	568090	1.12356e+06	710614	2.00557e+07	848363	837665	965164	2.30739e+06	2.15092e+07	2.92145e+07	2.69719e+07	2.56469e+07	2.6633e+07	1.59993e+07	1.70023e+07	2.3598e+07	2.45439e+07	2.40708e+07
glutathione disulfide_13C(M+10)_nega	N/A	5.91369e+06	5.6652e+06	5.93901e+06	6.60101e+06	4319.23	2.20889e+06	3.33401e+06	2.29383e+06	2.96203e+06	N/A	N/A	5758.93	N/A	N/A	9118.27	11514.1	4798.5	N/A	7676.69	12478.3	2.39356e+06	3.64666e+06	16321.4	3.45151e+06	N/A	4.50706e+06	4.24818e+06	4.15846e+06	5.7085e+06	N/A	10559.2	N/A	3358.9	N/A	3838.39	22076.8	15837.3	14395.8	7198.73
glutathione disulfide_13C(M+10)_posi	N/A	145413	121415	151166	127173	N/A	50375.7	66228.8	53270.4	58550.2	N/A	N/A	N/A	N/A	N/A	N/A	N/A	N/A	N/A	N/A	N/A	117587	109418	N/A	98860.2	N/A	96939.5	109413	107980	250036	N/A	N/A	N/A	N/A	N/A	N/A	N/A	N/A	N/A	N/A
glutathione disulfide_13C(M+5_0)_nega	19196.8	2.61242e+06	2.22258e+06	2.44969e+06	2.35441e+06	23035.7	2.87812e+06	4.15051e+06	2.92845e+06	3.93031e+06	18235	109422	211483	160772	198199	68620.2	118538	76296.1	142048	85425.6	62864.8	441519	565459	13437.2	660350	20144	1.33939e+06	914313	952628	1.56746e+06	3362.51	136295	100299	108940	84947.6	14877	252445	257717	220766	247640
glutathione disulfide_13C(M+5_0)_posi	N/A	52307.6	61906	56629.6	61908	N/A	63825.1	77259.7	76783.5	83022.9	N/A	N/A	3839.24	4800.11	4317.82	N/A	N/A	N/A	N/A	N/A	N/A	19197.6	16800	N/A	21594.6	N/A	27836	26396.4	31193.6	31673.1	N/A	4798.6	4798.57	3838.35	N/A	N/A	8161.14	10559.1	N/A	5757.55
glutathione disulfide_13C(M+5_5)_nega	14397.4	2.33186e+06	2.44423e+06	2.36198e+06	2.5658e+06	27356.9	2.61284e+06	4.0269e+06	2.79729e+06	4.04636e+06	17277	116619	174716	149728	151643	77748.2	131577	80142.2	126698	95979.1	50873.6	446745	608270	25915.4	570444	27829.1	927188	990536	974781	1.47951e+06	N/A	108460	100304	85904.1	83987.6	16316.9	201559	239377	217884	217403
glutathione disulfide_13C(M+5_5)_posi	N/A	52308.4	66228.7	49432.3	52307.9	N/A	64790.9	75343.9	67664.6	75344.9	N/A	10557.4	7198.77	4319.25	5279.57	N/A	N/A	N/A	N/A	N/A	N/A	18238.9	20154.9	N/A	11997.4	N/A	27833.1	41272	27353.7	30712.7	N/A	N/A	N/A	3838.37	N/A	N/A	4317.75	7198.75	N/A	7198.97
glutathione disulfide_nega	1.33034e+07	1.15136e+06	981168	983090	993959	1.75731e+07	3.72817e+06	5.54854e+06	4.00382e+06	4.91082e+06	1.46151e+07	6.1662e+06	8.10295e+06	7.92232e+06	8.42702e+06	2.08852e+07	1.87264e+07	1.80213e+07	1.68502e+07	1.64701e+07	9.68839e+06	154690	153073	111820	179926	1.14057e+07	237900	262982	251470	467422	9.53738e+06	6.96123e+06	5.2044e+06	5.69258e+06	5.43319e+06	1.00358e+07	3.81282e+06	5.6079e+06	5.67976e+06	5.75494e+06
glutathione disulfide_posi	424571	24953.3	18715.2	19675.6	21595.7	371424	101743	110860	80622	113739	428116	236558	274510	215004	447742	384528	369975	317694	314825	360367	215596	5264.05	N/A	4799.23	N/A	358010	8157.6	7198.75	6716.42	7197.3	303731	198684	120452	111335	115540	165547	98325.8	127174	168929	153572
glutathione_13C(M+2)_nega	279367	571228	472968	564491	549456	39850.5	192435	189981	114687	164011	320030	710968	1.07315e+06	952461	991141	117997	185882	185258	207760	166134	94552.4	62856.3	104614	30241.7	88693.8	37786.1	145964	139591	157399	173279	93344.9	106090	143995	190928	57950.6	23473.1	295769	384647	249882	314192
glutathione_13C(M+2)_posi	137386	56697.9	67482.2	66992	63275.7	17668.8	30547.5	27887.5	17596.5	11519.3	166439	175218	167877	134137	153075	32130.5	46995.2	44989.6	43546.5	34490.9	37432.9	13286.7	4278.79	11910.9	10379.5	15475.2	8625.39	15806.3	11832.5	11518	25695.8	26636.7	29559.1	25915.3	11882	6831.62	69685	88758	47965.8	60785.7
glutathione_13C(M+5)_nega	N/A	N/A	N/A	N/A	5278.13	7190.3	N/A	5278.21	N/A	12959.1	N/A	N/A	8157.37	N/A	11522.5	7134.86	6233.28	N/A	N/A	N/A	N/A	N/A	4798.68	5733.28	N/A	4319.2	6719.12	6237.91	N/A	11517.9	N/A	N/A	9119.4	N/A	N/A	7793	6238.27	N/A	5758.91	N/A
glutathione_13C(M+5)_posi	9596.77	1.9323e+06	1.83337e+06	2.80303e+06	2.51972e+06	29937.9	365921	274081	215809	255378	7657.53	18214.8	35502.1	37191.7	30715.6	34519	48344.4	36141.3	37091	28324.6	61628.2	127195	88216.6	4319.26	156238	22073.5	217936	251759	422715	295076	4800.11	N/A	4315.92	N/A	N/A	11954.2	93907.3	65349	33310.6	54193.6
glutathione_13C(M+7)_nega	19197.4	204755	135748	285902	227838	6238.43	37381.5	16315	29754.1	30274.2	21596.6	N/A	7198.75	N/A	N/A	N/A	10557.7	11997.1	8638.49	6239.88	7199.94	9110.17	7679.52	N/A	19681	3839.82	19679	38872.7	39349.6	42696.7	N/A	N/A	4319.24	N/A	N/A	N/A	11998.8	11607.8	12957.6	4319.23
glutathione_13C(M+7)_posi	N/A	145173	93263.7	150651	142532	N/A	16120	18348.4	12605.3	11151.5	N/A	N/A	N/A	N/A	N/A	N/A	5551	N/A	N/A	N/A	5039.12	7919.7	6836.32	N/A	10052	N/A	12597.2	12631.2	23035.9	21334.3	N/A	N/A	N/A	N/A	N/A	N/A	5486.62	5027.57	N/A	N/A
glutathione_nega	5.01548e+06	2.73604e+06	2.1406e+06	2.95154e+06	2.60976e+06	761019	1.01589e+06	870911	692195	776744	6.28837e+06	4.282e+06	5.38579e+06	5.70744e+06	5.10814e+06	2.02206e+06	2.28803e+06	1.99792e+06	2.55189e+06	1.82536e+06	1.32373e+06	336971	234220	449972	406641	623141	412318	286381	349614	367209	1.471e+06	660842	919501	1.00294e+06	479270	316540	1.20764e+06	1.66922e+06	1.03264e+06	1.10168e+06
glutathione_posi	2.28085e+06	1.20844e+06	1.17526e+06	1.12366e+06	1.28892e+06	295521	401336	497554	287781	338102	2.53883e+06	2.44664e+06	2.60533e+06	2.40299e+06	2.20555e+06	669896	728148	604753	894558	533965	610157	161109	112301	260022	140340	224148	137405	152050	197256	136044	489108	189002	352088	373871	134695	113458	411262	569316	316115	368029
glyceraldehdye-3-phosphate_13C_nega	13456	11124.7	N/A	N/A	N/A	7912.86	N/A	N/A	N/A	11875.4	11118.6	1.62621e+06	2.10765e+06	1.89966e+06	2.31894e+06	N/A	1.4028e+06	1.44441e+06	1.71273e+06	1.15422e+06	N/A	6838.84	N/A	N/A	6838.59	N/A	N/A	N/A	N/A	N/A	N/A	3.13345e+06	2.83792e+06	2.92482e+06	2.7572e+06	N/A	935037	1.50437e+06	1.03026e+06	1.47976e+06
glyceraldehdye-3-phosphate_nega	2.08157e+06	2.48898e+06	2.62489e+06	2.4372e+06	2.82679e+06	1.40438e+06	1.28359e+06	1.30853e+06	1.24779e+06	1.2438e+06	2.05946e+06	32750.1	78101.2	46194.5	49473.4	1.2627e+06	73507.2	68330.9	57555.7	50026.5	2.1777e+06	908634	1.17274e+06	187848	1.31832e+06	784349	1.13131e+06	1.36981e+06	1.4799e+06	1.82076e+06	2.45183e+06	86953	138025	62198.3	61111.5	539581	21516.5	31274.8	56593.6	33081.9
glycerate_13C_nega	N/A	N/A	N/A	N/A	N/A	N/A	5256.96	N/A	N/A	N/A	N/A	N/A	N/A	N/A	N/A	N/A	N/A	12568.4	N/A	N/A	N/A	N/A	N/A	N/A	N/A	N/A	N/A	3948.01	N/A	N/A	N/A	30590.6	11446.5	16106.7	21551.3	N/A	13318.3	10585.4	20513	20493.2
glycerate_nega	271527	329352	284444	386573	326335	733018	554452	795805	532096	662665	246461	158769	251867	218898	247180	851823	1.06691e+06	904712	942881	821096	508654	357136	363899	366409	480349	395661	442058	386198	350035	548524	517795	687422	533259	455109	581853	234338	249569	350247	427444	317912
glycine_13C_posi	N/A	N/A	N/A	N/A	N/A	N/A	N/A	N/A	N/A	N/A	N/A	N/A	N/A	N/A	N/A	N/A	N/A	N/A	N/A	N/A	N/A	N/A	N/A	N/A	N/A	N/A	N/A	N/A	N/A	N/A	N/A	48591.3	28075.3	24543.9	29154.7	N/A	54358.1	64419.5	65481.4	59663.7
glycine_posi	N/A	N/A	N/A	N/A	N/A	N/A	N/A	N/A	N/A	N/A	N/A	N/A	N/A	N/A	N/A	N/A	N/A	N/A	N/A	N/A	N/A	N/A	N/A	N/A	N/A	N/A	N/A	N/A	N/A	N/A	N/A	N/A	N/A	N/A	N/A	N/A	N/A	N/A	N/A	6064.38
hexose-phosphate	5.01724e+06	7.01619e+06	5.78607e+06	7.48739e+06	7.37817e+06	6.05629e+06	4.97723e+06	6.6321e+06	4.91857e+06	6.35579e+06	5.18294e+06	629602	1.04799e+06	832707	847900	9.43723e+06	2.45934e+06	2.14849e+06	2.24653e+06	1.7775e+06	2.03303e+07	1.4747e+07	1.69601e+07	2.38391e+06	1.70043e+07	2.24413e+07	2.6927e+07	2.73751e+07	2.67514e+07	3.35915e+07	2.19407e+07	6.9757e+06	5.74607e+06	5.47148e+06	4.72846e+06	1.76436e+07	4.64804e+06	6.72452e+06	7.27325e+06	6.75267e+06
hexose-phosphate_13C_nega	77829.4	39127	53343.7	76806.5	41092.9	50672.9	15703.6	79565.5	46820.7	79165	38963.6	3.42787e+06	3.95038e+06	3.52781e+06	3.81185e+06	40565.7	6.80463e+06	5.56342e+06	6.14658e+06	5.24852e+06	43239.4	21695.3	25310.9	22119.3	16223.7	18715.7	31836.9	54836.6	18108.9	52482.4	27381.4	8.46899e+06	5.38344e+06	7.17533e+06	5.84724e+06	12337	4.70267e+06	6.66334e+06	6.92392e+06	6.82177e+06
HMG CoA_13C_nega	N/A	N/A	N/A	N/A	N/A	N/A	N/A	N/A	N/A	N/A	N/A	N/A	N/A	N/A	N/A	N/A	N/A	N/A	N/A	N/A	N/A	N/A	N/A	N/A	N/A	N/A	N/A	N/A	N/A	5036.53	N/A	N/A	N/A	N/A	N/A	N/A	N/A	N/A	N/A	N/A
HMG CoA_nega	N/A	N/A	N/A	N/A	N/A	N/A	N/A	N/A	N/A	N/A	N/A	N/A	N/A	N/A	N/A	N/A	N/A	N/A	N/A	N/A	N/A	N/A	N/A	N/A	N/A	N/A	N/A	N/A	N/A	N/A	N/A	N/A	N/A	N/A	N/A	N/A	N/A	N/A	N/A	N/A
IPP_13C(M+3)_nega	12963.9	15826.8	8160.65	13326.9	13437	N/A	4798.35	N/A	9556.84	N/A	11965.2	7196.02	27835.3	12478.2	15805.1	N/A	9118.08	10077	11521.1	4305.54	N/A	4799	N/A	N/A	N/A	N/A	N/A	N/A	N/A	3370.87	9599.03	41236.7	34576	25169.9	19661.4	N/A	20635.8	33602.7	34547	31224.8
IPP_13C(M+5)_nega	5278.89	N/A	4307.55	8609.01	4318.13	5299.86	7201.58	4802.9	6717.67	8159.03	N/A	12474.8	20156.5	23037.3	12476.6	15357.5	17276.7	23992.9	8919.82	23993.3	N/A	N/A	N/A	N/A	N/A	N/A	9596.88	N/A	N/A	4320.49	N/A	26395.3	11606.1	27799.3	23035.3	N/A	7676.31	13419.9	16806	27128.3
IPP_nega	36426.5	32574	25584.8	51418.5	42795.6	32072.4	15839.5	16901.1	16549.5	26880.4	35885.6	21989.6	15230.5	11440.5	19646.5	22813	34608.1	12130.1	11894.9	6240.51	70440.8	38320.2	37679.8	4444.76	43493.9	35448.5	56338.4	48016.1	39776	115398	66024.7	44220	51218.6	54398.4	28024.5	27845.9	38507.8	63564.3	54540.2	87189.4
isocitrate _nega	85079.4	36457.1	27712.2	59753	37985.9	95513	14323.9	34759.4	26828.5	26367.7	125498	23855.4	38485.9	38112.1	34691.7	133353	63025.1	52361.4	55750.4	43595.6	150689	32029.8	28163.7	17158.3	31131.1	170730	39348.8	81633.8	63428.6	69715.6	194385	59913.3	36673.6	42331.3	44839.6	152857	26088.5	58042.4	46845.9	43776.8
isocitrate_13C(M+1_0)_nega	4319.17	18234.7	10568.8	17282.2	11047.7	N/A	61426.8	73908.1	44152.8	79666.1	N/A	6639.05	6500.6	5789.45	9586.95	5758.64	20663	23203	22563.5	12467.2	N/A	N/A	48953.8	18716.7	20100.8	N/A	120943	34071.5	23036.8	55799.9	N/A	8655.53	N/A	N/A	3360.87	6728.51	16903.5	10915.8	N/A	14180.2
isocitrate_13C(M+1_1)_nega	5701.28	17328.8	16198.2	27120.5	20156.6	N/A	18234.3	11583.6	9603.15	N/A	6580.57	13438.6	8216.19	15359.5	11511.9	5281.06	7215.97	N/A	17757.8	9987.89	17026.7	13441.2	32046.5	N/A	17753	8185.67	34809.6	17279.1	43898.5	38835.6	14866.3	8635.84	5278.08	N/A	4318.62	6208.41	9057.81	11430.2	9506.5	8563.53
isocitrate_13C(M+2_0)_nega	N/A	11519.4	11513.8	11615.9	7197.19	N/A	11040.5	4318.67	N/A	N/A	N/A	N/A	N/A	N/A	N/A	N/A	N/A	5720.75	5279.57	N/A	N/A	10559.3	10076.6	N/A	9608.45	N/A	19686.9	16848.6	26878.2	27014.8	N/A	4817.18	7678.04	N/A	7713.26	N/A	4315.85	N/A	3838.4	7678.34
isocitrate_13C(M+2_1)_nega	N/A	8626.95	5758.79	24473.2	22555.5	N/A	N/A	3839.83	N/A	6717.84	N/A	6705.91	N/A	N/A	N/A	N/A	127867	125086	96312.4	111512	N/A	10078.4	N/A	N/A	N/A	N/A	7676.72	9597.16	N/A	7677.94	N/A	11088.5	8698.57	N/A	14889.8	3347.85	32775.5	68358.8	60080.2	48921.9
isocitrate_13C(M+2_2)_nega	6230.86	52319.9	40063.7	53329.1	58047.2	3778.78	26326.5	31669.7	19176.5	13983.8	N/A	47776.3	71980.3	52764.9	60068.1	5758.41	43068.5	36362	55164.6	31359.4	N/A	27826.3	26379.7	7208.43	29731.1	N/A	39813.5	37418.8	40752.5	38001	N/A	106852	66351.8	88784	83374.5	N/A	125381	99807.5	98689.1	115054
isocitrate_13C(M+3_1)_nega	N/A	18393.3	11866.9	13438.6	7679.61	N/A	7197.31	6241.46	N/A	7671.02	N/A	N/A	N/A	N/A	N/A	N/A	N/A	N/A	3361.2	N/A	N/A	9569.85	N/A	9107.83	5273.26	N/A	14803.8	17277.8	18238.7	20641.7	N/A	N/A	N/A	3938.63	N/A	N/A	N/A	N/A	N/A	6264.1
isocitrate_13C(M+3_2)_nega	N/A	N/A	8638.25	N/A	5758.2	N/A	N/A	11528	7188.7	8638.55	N/A	N/A	N/A	7648.78	3358.73	N/A	8157.56	13906.8	13438.8	5279.6	N/A	N/A	5756.74	N/A	N/A	N/A	8114.18	3855.79	6238.43	11036.8	N/A	3359.01	N/A	N/A	5758.98	N/A	15357.6	10527	7621.25	3839.79
isocitrate_13C(M+3_3)_nega	N/A	3358.95	N/A	N/A	N/A	N/A	N/A	3839.84	N/A	N/A	N/A	N/A	N/A	N/A	7198.69	N/A	N/A	N/A	N/A	4317.33	N/A	N/A	N/A	3834.55	3354.98	N/A	N/A	N/A	N/A	N/A	N/A	N/A	N/A	N/A	4304.98	N/A	9607.76	5298.61	5760.27	3836.53
isocitrate_13C(M+4_2)_nega	N/A	84489.3	47027.6	59512.8	43054.8	8159.06	57565.4	73913.1	35036.9	41275.4	4797.28	11997.5	12480.7	9601.46	10586.4	19675.8	18237.3	23037	11995.8	12957.7	N/A	40780.7	48492.8	11516.5	38383	5759	84984.5	109413	98247	129577	N/A	15839.4	11038.3	14932.2	11033.4	8161.57	14874.8	21213.7	20160.7	18238.8
isocitrate_13C(M+4_3)_nega	N/A	N/A	N/A	N/A	N/A	N/A	N/A	N/A	N/A	N/A	N/A	N/A	N/A	N/A	N/A	N/A	N/A	6753.2	4323.45	3829.63	N/A	N/A	N/A	N/A	N/A	N/A	N/A	N/A	N/A	N/A	N/A	N/A	3360.37	N/A	4799.77	N/A	N/A	N/A	11518.3	3856.4
isocitrate_13C(M+4_4)_nega	N/A	N/A	N/A	6696.28	7196.75	4799.4	6238.28	N/A	N/A	11038.2	N/A	5278.13	N/A	11752.7	10083.6	N/A	8145.78	N/A	N/A	N/A	N/A	11026.7	N/A	N/A	4394.64	N/A	N/A	N/A	N/A	N/A	N/A	7236.98	12014.4	11997.4	18732.3	N/A	20756.6	13433.3	20153.1	15340.9
isocitrate_13C(M+5_3)_nega	N/A	8145.71	13437	4714.05	20661.7	N/A	18213.9	17755	9096.89	16796.1	N/A	N/A	N/A	3839.79	6239.62	N/A	N/A	4798.52	N/A	N/A	N/A	8638.61	12540	N/A	29274.2	N/A	20607.4	13446.4	9119.36	29755.5	N/A	12478.8	N/A	8638.48	N/A	N/A	8638.34	6722.86	9556.66	5281.43
isocitrate_13C(M+5_4)_nega	N/A	N/A	4319.26	6228.76	N/A	6719.22	N/A	N/A	N/A	8138.4	N/A	N/A	8030.27	4798.52	9600.85	6719.11	14873.2	N/A	8024.18	7248.94	N/A	N/A	N/A	3968.46	N/A	N/A	N/A	N/A	N/A	3600.32	N/A	12475.8	8638.96	7197.29	9598.76	N/A	7108.77	23036	25447.7	12999.4
isocitrate_13C(M+6_4)_nega	5276.9	4333.09	N/A	N/A	N/A	N/A	3838.32	N/A	N/A	N/A	N/A	N/A	13911.7	N/A	4796.32	N/A	N/A	N/A	N/A	N/A	N/A	N/A	8636.93	6239.87	4799.97	N/A	N/A	N/A	4319.23	11517.6	N/A	N/A	5262.95	3346.55	N/A	N/A	N/A	9808.42	11992.5	6239.82
lactate_13C(M+3)_nega	292792	4.7337e+06	3.57619e+06	4.21735e+06	4.49864e+06	1.03535e+06	1.59875e+06	2.72769e+06	1.90003e+06	2.23272e+06	270731	9.72365e+07	1.19128e+08	1.11501e+08	1.11398e+08	1.04392e+06	8.11414e+07	7.56539e+07	7.60662e+07	7.33704e+07	310792	1.50605e+06	1.82213e+06	3.15114e+06	2.36723e+06	530758	3.38323e+06	3.68349e+06	3.28058e+06	4.93135e+06	185362	1.32029e+08	1.19782e+08	1.24725e+08	1.25306e+08	303670	1.14576e+08	1.33057e+08	1.45452e+08	1.3733e+08
lactate_nega	7.58388e+07	7.52425e+07	6.7275e+07	7.18818e+07	7.74879e+07	4.21242e+07	3.29112e+07	4.21289e+07	3.46369e+07	3.75942e+07	7.14713e+07	4.37845e+06	7.33017e+06	4.50408e+06	5.39568e+06	4.87803e+07	1.17925e+07	7.17163e+06	1.03426e+07	6.75174e+06	5.98728e+07	4.42337e+07	5.24953e+07	6.81259e+07	5.84798e+07	7.49372e+07	7.72788e+07	7.17328e+07	7.42647e+07	9.36532e+07	6.54746e+07	8.73082e+06	1.31146e+07	1.01352e+07	7.03419e+06	7.54185e+07	4.47579e+06	9.14451e+06	1.37545e+07	9.14424e+06
L-arginino-succinate	67668.7	15477.3	19435.6	19116.6	14390.4	77746.4	15110.9	22322.6	12228.1	19447.3	67637.6	40670	45343.9	38524.2	39953.8	90704.3	97995.5	88110.5	90341.9	75226.7	42469.1	8998.25	4317.12	N/A	6839.37	62269.2	12596.8	12241.3	14397.2	20876.3	52551	57230	32016.3	35991.5	23399	56507.1	36031.8	49670.8	52550.8	31406.3
L-arginino-succinate_13C	N/A	N/A	N/A	N/A	N/A	N/A	N/A	N/A	N/A	N/A	N/A	N/A	N/A	N/A	N/A	N/A	10945.1	N/A	N/A	5040.94	N/A	N/A	N/A	N/A	N/A	N/A	N/A	N/A	N/A	N/A	N/A	N/A	N/A	N/A	N/A	N/A	N/A	N/A	N/A	N/A
malate_13(M+4)_nega	414344	1.84222e+07	1.70562e+07	1.90906e+07	1.88387e+07	N/A	1.63454e+07	1.96822e+07	1.52815e+07	1.91394e+07	250430	971106	1.30686e+06	1.3109e+06	1.25577e+06	N/A	431292	423476	301905	429764	187244	7.17793e+06	8.03199e+06	2.43376e+06	8.94466e+06	N/A	1.31279e+07	1.37897e+07	1.28272e+07	1.51584e+07	529490	732904	830424	1.26703e+06	661762	211528	1.03512e+06	1.27724e+06	1.11137e+06	1.01206e+06
malate_13C(M+1)_nega	1.21371e+06	2.9968e+06	2.51093e+06	2.55019e+06	2.84241e+06	1.25687e+06	1.11181e+06	1.51379e+06	1.04924e+06	1.22063e+06	1.28456e+06	1.09064e+06	1.57617e+06	1.10806e+06	1.43149e+06	1.29253e+06	1.9956e+06	1.85236e+06	2.07015e+06	1.59322e+06	696392	978265	1.01318e+06	178800	1.29976e+06	963764	2.62042e+06	2.63012e+06	2.5907e+06	3.34843e+06	838118	1.14153e+06	1.01758e+06	980725	887553	705718	1.09246e+06	1.29537e+06	1.20417e+06	1.32987e+06
malate_13C(M+2)_nega	584933	6.52372e+06	5.70401e+06	6.52451e+06	6.32461e+06	672118	3.36773e+06	4.33579e+06	3.07397e+06	4.17893e+06	647999	4.40746e+06	6.1606e+06	5.03128e+06	5.54919e+06	727379	3.68131e+06	3.46118e+06	4.14054e+06	3.03183e+06	332533	2.2195e+06	2.69045e+06	339800	2.99286e+06	411037	5.04395e+06	4.94258e+06	4.97534e+06	6.1604e+06	398946	4.33062e+06	3.74064e+06	3.88232e+06	3.42522e+06	354973	4.22823e+06	5.57366e+06	4.96985e+06	5.5506e+06
malate_13C(M+3)_nega	20985.5	3.9412e+06	3.2942e+06	3.6081e+06	3.7396e+06	46092.3	4.89904e+06	6.14952e+06	4.41912e+06	5.99743e+06	52814.3	2.70012e+06	3.83317e+06	2.89893e+06	3.01129e+06	34215.8	1.07384e+06	1.08621e+06	1.14215e+06	923076	24211.5	1.01937e+06	1.33179e+06	207411	1.42004e+06	27088.3	2.24884e+06	2.33171e+06	2.31287e+06	2.92085e+06	18731.8	2.20193e+06	1.88334e+06	2.04112e+06	1.64897e+06	17195.1	2.56403e+06	3.02053e+06	2.89148e+06	2.79148e+06
malate_nega	2.60107e+07	5.25066e+06	5.03411e+06	4.70672e+06	4.65027e+06	2.43751e+07	3.71302e+06	4.5692e+06	4.06488e+06	4.56384e+06	2.69294e+07	1.44584e+07	1.99181e+07	1.82704e+07	1.72825e+07	2.77878e+07	2.53512e+07	2.25737e+07	2.50361e+07	2.17437e+07	1.71261e+07	1.93388e+06	1.91636e+06	2.10203e+06	2.27262e+06	1.99221e+07	3.67631e+06	3.93715e+06	3.8776e+06	5.36016e+06	1.79058e+07	1.59277e+07	1.22329e+07	1.36356e+07	1.31197e+07	1.57647e+07	1.24802e+07	1.55804e+07	1.468e+07	1.62553e+07
mevalonate_13C(M+2_0)_nega	99746.4	140528	73514	139999	90569.5	138735	91621.2	119914	79857.9	112229	67577.6	39188.1	53495.3	39324.3	41998.3	157030	86529.3	95260.3	93808.9	69888.8	46551.7	50901.8	42862.4	30890.3	57518.8	45343.8	121154	98016.2	85150.5	152865	39806.8	56762.5	84547.6	40017	48185.6	40116.6	30235.8	61330.6	47962	51410.3
mevalonate_13C(M+2_0)_posi	211883	179969	188127	169737	180032	245845	161731	233340	190984	198437	176614	139211	148842	155970	155042	226884	253385	242360	232606	242051	168896	131467	158485	216845	157891	191024	176139	152708	168419	218837	161480	245863	201469	212514	254924	157907	144454	155449	224605	196356
mevalonate_13C(M+2_2)_nega	N/A	3358.49	16317	4853.23	N/A	N/A	7621.62	3839.84	N/A	N/A	4425.21	6234.79	3838.16	4319.5	N/A	N/A	4331.4	3343	9205.81	N/A	N/A	N/A	3373.28	N/A	N/A	N/A	N/A	N/A	N/A	N/A	N/A	9580.44	N/A	N/A	4558.66	N/A	N/A	N/A	12601.4	2883.24
mevalonate_13C(M+2_2)_posi	100304	117569	104137	128508	115614	146808	105096	167095	104621	124790	105358	97399.8	110380	92143	74870.2	163172	211054	176037	210564	200703	80140.3	98357.7	86307.6	141576	107452	98388.1	102209	99341.6	83991.3	135336	124702	167036	149740	136285	150668	82512.6	101022	124282	147230	121905
mevalonate_13C(M+4_0)_nega	52157.5	157021	98222.1	78416.4	90751.3	230272	74036.9	93145.7	215967	89911	58513.3	12917.6	25281.2	10168.4	16556.2	299172	201046	153675	152691	133432	20912.5	73412.6	111539	30699.2	117967	25105.6	130916	119382	153580	163705	47344.2	29653.9	30057.5	34733.6	23300.7	22417.9	20471.2	63140.7	41264.4	44863.4
mevalonate_13C(M+4_2)_nega	N/A	15834.7	9117.8	17278.4	22072.8	N/A	6719.3	12956.4	14497.1	13008.6	N/A	N/A	N/A	N/A	N/A	N/A	N/A	N/A	N/A	N/A	N/A	10559.1	7198.69	N/A	11511.6	N/A	22556.1	15357.5	20153.5	23025	N/A	N/A	N/A	N/A	N/A	N/A	N/A	N/A	N/A	8232.83
mevalonate_13C(M+4_2)_posi	N/A	7676.21	10083.4	7066.2	6707.19	34541.3	10078.4	17763.9	17751.5	24449	N/A	N/A	5758.99	N/A	N/A	29648.8	31191.4	35510.8	40326.8	34031.9	N/A	N/A	5276.62	N/A	5758.97	6237	6238.43	6718	9594.01	13427	8641.79	N/A	N/A	N/A	N/A	N/A	5771.9	7637.25	5757.58	N/A
mevalonate_13C(M+4_4)_posi	N/A	7196.59	7634.7	6721.68	10044.7	N/A	N/A	10594.3	8522.45	10109.8	N/A	N/A	8659.73	6716.32	N/A	4797.24	N/A	6732.13	8167.7	6236.86	5756.11	N/A	6236.18	6719.5	8643.71	5763.34	9402.34	11986.5	5758.66	7218.52	8123.17	7193.68	10557.6	10549	9116.81	N/A	N/A	11029.4	11036.2	7329.2
mevalonate_13C(M+6)_nega	N/A	N/A	N/A	N/A	N/A	N/A	N/A	10557.7	N/A	N/A	N/A	N/A	N/A	N/A	N/A	N/A	N/A	N/A	17726.8	10525.4	N/A	N/A	3839.7	N/A	N/A	N/A	N/A	N/A	N/A	N/A	N/A	N/A	N/A	N/A	N/A	N/A	N/A	N/A	N/A	N/A
mevalonate_13C(M+6)_posi	N/A	5262.96	N/A	7198.32	N/A	N/A	28318.5	35027	32141.7	41803.9	N/A	N/A	N/A	5757.55	N/A	N/A	12958.8	8636.87	14876.9	11991.9	N/A	N/A	N/A	N/A	4317.05	N/A	N/A	5752.6	5767.35	4798.45	N/A	5281.37	N/A	N/A	N/A	N/A	N/A	N/A	5279.18	9119.05
mevalonate_nega	7502.93	42704	7460.42	13195.3	8073.31	11667.8	74511.2	10033.4	16247.4	14733.6	19499.4	18397	4212.59	3946.65	9532.28	21219.9	23517.8	14548.6	37045.4	7844.43	N/A	41614.7	24692.6	61951	5600.63	43954	44077.3	33395.4	24025.5	32126.4	6613.57	19661.9	15166.9	8061.43	13466.9	28974.1	29364.7	12800.4	N/A	28126.7
mevalonate_posi	N/A	5344.89	N/A	5158.13	3707.53	4962.9	N/A	4195.41	N/A	N/A	4542.1	4621.97	2753.99	2812.78	N/A	3464.9	N/A	N/A	5279.84	6297.72	1963.41	6828.83	8309.98	3200.18	N/A	4101.68	N/A	N/A	3710.81	8360.04	3771.49	8506.28	2551.28	5911.5	N/A	N/A	4159.52	N/A	5792.55	4751.5
mevalonate-5-phosphate_13C_nega	3598.75	8617.09	N/A	4464.03	N/A	4165.73	N/A	9966.44	N/A	N/A	6023.53	23756.2	40472.9	18800	38159.8	5816.21	32927.9	27514.1	26253.2	21912.3	3957.53	3239.48	N/A	N/A	2881.58	2810.14	11185.8	4303.62	N/A	N/A	N/A	24624.6	22327.1	24835.6	34203.9	N/A	10014.2	36666.6	16033.5	31318
mevalonate-5-phosphate_nega	10770.4	26274.9	30579.3	44632.9	25540.8	N/A	N/A	N/A	N/A	7199.78	10791.3	N/A	6478.71	N/A	N/A	N/A	5021.66	N/A	N/A	N/A	11514.6	7918.49	11480.6	2868.31	8278.39	6838.75	13677.5	12597.6	10078.4	15514.2	20876	N/A	N/A	N/A	N/A	N/A	N/A	N/A	N/A	N/A
mevalonate-5-pyrophosphate_13C_nega	N/A	5661.05	17267.3	23122.1	21948.7	5399.04	11877.9	7268.06	12964.3	19436.6	N/A	N/A	N/A	N/A	N/A	4674.22	7558.02	N/A	7198.74	5754.54	N/A	N/A	4670.46	3599.36	5408.3	N/A	4401.43	16270.7	7565.46	13394	6086.84	11158.1	6838.8	N/A	7193.04	N/A	N/A	8449.47	9632.55	N/A
mevalonate-5-pyrophosphate_nega	2.13984e+06	1.04546e+06	1.05101e+06	1.35118e+06	1.26885e+06	354720	476691	466670	263323	311302	2.5276e+06	1.81382e+06	2.28132e+06	2.37984e+06	2.19523e+06	810395	886953	815123	1.08524e+06	732086	538902	165666	88873.2	188780	156537	283551	145697	119577	154735	164899	729075	234985	377613	366895	156371	117417	494768	637245	325786	417615
N-acetyl-glucosamine-1-phosphate_13C_nega	84151.3	122676	105389	85626.5	81650.5	46927.5	57583	71974.5	53699.8	107313	88427.6	695206	753558	788408	839530	74568.3	548406	438581	373887	381289	15788.7	26275.3	21595.3	9717.13	24115.9	10541.3	32657.2	37648.7	38063.5	51720.8	37351.2	363121	292152	312807	289355	9796.84	243865	400440	411699	416473
N-acetyl-glucosamine-1-phosphate_13C-Ac_nega	40611.5	44560.5	24462.9	40405.9	32897.4	37781.6	51704.8	64616	54638.5	71860.8	45352.5	166106	235174	223138	228695	64656.2	454681	499922	419363	373380	18017.6	10078.2	18337.5	9717.96	20821.5	49309.3	52020.5	50607.3	48229.3	64732.2	27234.7	171609	165217	123101	133819	47871.9	115171	140887	136592	181271
N-acetyl-glucosamine-1-phosphate_nega	1.1739e+06	1.41449e+06	1.33432e+06	1.51269e+06	1.35275e+06	1.17087e+06	787941	1.16523e+06	870173	1.12958e+06	1.339e+06	176877	195240	234023	255787	1.63798e+06	932723	854139	609041	685583	451252	261503	379361	362747	408066	551085	621632	716706	673306	1.06464e+06	462895	123647	93716.6	117708	87396.6	404517	108221	130567	144734	132415
N-carbamoyl-L-aspartate_13C	N/A	N/A	N/A	N/A	N/A	N/A	N/A	N/A	N/A	N/A	N/A	N/A	N/A	N/A	N/A	N/A	N/A	N/A	N/A	N/A	N/A	N/A	N/A	N/A	N/A	N/A	N/A	N/A	N/A	N/A	N/A	N/A	N/A	N/A	N/A	N/A	N/A	N/A	N/A	N/A
N-carbamoyl-L-aspartate_13C(M+4)_posi	N/A	N/A	N/A	N/A	N/A	N/A	N/A	N/A	N/A	N/A	N/A	N/A	N/A	N/A	N/A	N/A	N/A	N/A	N/A	N/A	N/A	N/A	N/A	N/A	N/A	N/A	N/A	N/A	N/A	N/A	N/A	N/A	N/A	N/A	N/A	N/A	3838.33	6236.86	N/A	N/A
N-carbamoyl-L-aspartate_posi	N/A	N/A	5281.16	5748.95	5758.24	8165.23	N/A	9114.02	N/A	6717.83	4794.82	N/A	5760.29	4318.91	N/A	N/A	11983.6	5246.04	11516.6	6739.31	5277.69	N/A	N/A	N/A	N/A	7198.75	N/A	N/A	N/A	5779.36	6239.9	3824.43	5276.51	5757.1	N/A	6230.73	N/A	7767.3	4731.72	10076.8
O8P_O1P_13C_nega	69834.6	90641.5	59023.5	87065.8	71830.5	37269.5	43192.1	62631.7	53966.4	46437.3	43552.3	323602	448756	332219	415376	31299	737835	655791	647758	524982	43200.9	35305.9	37611.1	60110.1	58672.4	13680.5	77730.1	81343.2	83145.6	103643	44045.7	524381	308012	342563	381745	9703.54	371617	511250	471870	458561
O8P_O1P_nega	569391	842959	709557	743308	864428	2.09977e+06	1.55712e+06	2.20147e+06	1.64096e+06	2.05149e+06	603527	302063	410708	360577	382524	2.81014e+06	2.28419e+06	2.08982e+06	2.13359e+06	1.64316e+06	446320	292618	366223	47522.8	416321	399114	510373	542361	605738	733443	465996	357058	242957	250067	208301	263838	168416	233659	178968	204771
OBP_13C_nega	70543.6	463598	304949	589495	504599	89170.3	89264.9	96823.2	56152	85670.7	49647.6	88515.3	189320	136832	127071	136908	182667	177711	239993	136276	66776	63710	54345.2	51787	78463.8	110587	121907	127563	154759	193677	54739	79085.6	90711.3	97545.1	85314.1	63444.9	57512.9	89970.8	97526.9	116964
OBP_nega	38286.1	103474	93423.4	101341	119280	106899	82016.6	81016	86838.6	86585.2	63526.9	27727	43466.5	22666.2	23334.1	151285	60890.2	69820.2	43782.2	53286.4	25776.2	19406.2	31858.5	19473.5	17816.8	19459.8	33189.6	39372.3	69513.8	49978.9	24227	37187.5	43694.1	31230.5	30976.1	24055.6	19436.5	25553.3	45723.9	36713.1
ornithine_posi	N/A	N/A	N/A	N/A	N/A	N/A	N/A	N/A	N/A	N/A	N/A	N/A	N/A	N/A	N/A	N/A	N/A	N/A	N/A	N/A	N/A	N/A	N/A	N/A	N/A	N/A	N/A	N/A	N/A	N/A	N/A	N/A	N/A	N/A	N/A	N/A	N/A	N/A	N/A	N/A
phosphoenolpyruvate_13C_nega	41381.1	54298.6	56744	69240.2	43461.7	27692.5	24416.6	14240.9	20876.3	26085.7	66132.1	94527	160803	126070	130468	22617.5	172591	179308	174891	142986	57137	22188.5	26635.3	N/A	38960.4	53621	39452.3	53261.8	62044.9	70497.3	55750.9	218047	172508	172339	143681	31212.8	106316	164070	172590	158773
phosphoenolpyruvate_nega	138607	198503	179556	166294	268131	138805	89499.4	152012	143185	126237	172221	N/A	19031.3	N/A	9817.59	181059	18803.4	26272.5	30084.3	17966.5	183209	75685.8	87967.2	68389	84756.3	93238.7	181115	164154	220679	209617	153293	19372.7	17097.6	10257.6	14763.7	61892.5	7917.08	13348.8	26994	13933.6
proline_13C(M+5)_posi	117099	6.96483e+06	7.51498e+06	7.56788e+06	6.64353e+06	202795	2.56265e+06	3.46212e+06	2.28884e+06	3.97969e+06	107497	378650	273660	226997	225535	206717	242161	253351	174705	166670	114226	9.8875e+06	8.68317e+06	2.44802e+06	1.06036e+07	118539	1.33965e+07	1.75123e+07	1.67803e+07	1.91464e+07	160768	460719	337385	362333	322979	112301	718668	656516	702502	666689
proline_posi	8.15005e+06	2.22645e+06	2.02533e+06	2.30834e+06	3.06305e+06	4.37628e+06	1.31258e+06	1.90093e+06	1.2368e+06	1.59253e+06	9.67257e+06	4.64093e+06	5.98538e+06	6.628e+06	5.02368e+06	6.21587e+06	6.20355e+06	4.78547e+06	5.74481e+06	5.08722e+06	1.61195e+07	1.79027e+06	1.92789e+06	1.37482e+06	2.37258e+06	2.26165e+07	5.35712e+06	5.06326e+06	5.59241e+06	7.53531e+06	1.90506e+07	1.57322e+07	1.22795e+07	1.53729e+07	1.23737e+07	1.93745e+07	1.90199e+07	2.05906e+07	1.94808e+07	1.92291e+07
pyruvate_13(M+2_1)_nega	N/A	5867.93	8019.8	13066.8	11951.4	7451.99	10358.1	5260.95	8306.73	N/A	N/A	7057.83	N/A	9909.79	N/A	N/A	N/A	10574.8	9053.87	N/A	N/A	15442.1	8609.63	N/A	18805.2	N/A	16044.9	9905.89	11778	11774.3	N/A	N/A	N/A	14754.5	N/A	N/A	7562.87	8594.38	N/A	8261.91
pyruvate_13(M+2_2)_nega	N/A	N/A	N/A	N/A	218613	N/A	N/A	N/A	275473	146071	569673	N/A	N/A	321450	48253.2	N/A	185469	N/A	N/A	348705	166282	N/A	N/A	N/A	N/A	653748	690419	N/A	N/A	N/A	N/A	N/A	465129	N/A	366007	N/A	N/A	377940	N/A	N/A
pyruvate_13(M+3)_nega	26529.2	81925.7	N/A	45052	49240.5	5443.44	25585.2	45936.9	40858.2	34310.1	28343.5	N/A	33313	21338.3	14918.4	16772.3	11318.3	9653.55	35735	19328.8	7787.3	25094.7	N/A	N/A	30828.7	14125.8	34344.9	41018.6	N/A	88057.7	N/A	N/A	N/A	18359.9	N/A	4791.73	18202.2	30353.7	33819.1	10018.1
pyruvate_nega	6528.16	N/A	N/A	N/A	N/A	4741.34	N/A	N/A	N/A	N/A	N/A	13469.4	8369.97	5098.4	N/A	N/A	10807.4	10550	N/A	N/A	N/A	N/A	3871.4	N/A	N/A	N/A	N/A	N/A	N/A	N/A	N/A	N/A	N/A	4813.15	N/A	N/A	N/A	N/A	N/A	N/A
ribose-5-phosphate_13C_nega	N/A	44901.7	30232.3	37793.3	38181.4	6478.87	188968	322152	243709	337610	8993.05	758336	973834	899891	1.03432e+06	N/A	692207	771711	640954	543488	4320.38	35274.4	34554	11158	29904.2	4321.41	48195.9	46072.2	39586.9	73619.6	N/A	1.02739e+06	681967	689630	602171	N/A	259364	369151	298867	341249
ribose-5-phosphate_nega	1.00338e+06	1.33887e+06	1.20865e+06	1.51956e+06	1.44498e+06	747274	621960	702318	725621	501400	946547	25193.9	39406.8	17913.7	9705.37	617630	91900.5	41659.7	47246.6	52542.7	720591	358274	472493	183393	535280	270754	380981	372890	371321	494065	693434	44414.5	33843.2	40357.8	36023.2	162015	18858.1	28576.6	31355	32150.7
Sedoheptulose 1,7-bisphosphate (SBP)	175570	287670	229956	285382	281316	253139	268445	367535	211498	310150	128696	17321.5	35855.5	16737.9	34542.4	264073	159480	117715	109395	56281.1	132441	87813.4	100759	29289.7	89895.8	89004.9	161955	157870	123140	234520	136441	28278.5	31675.9	28503	41277.1	59981.4	27302.2	17234.4	29712.2	36473.2
Sedoheptulose 1,7-bisphosphate (SBP)_13C_nega	71826.5	32174.2	25323.1	20035	26467	86580.4	42217.9	93181.5	32302.8	127676	93937.5	145126	156949	155419	147861	151334	192298	315578	230565	251831	45178.9	17349.1	11746.4	12057.7	14014.6	86515	46049.3	46830.7	59341.2	49804.2	75177.7	227450	132142	159720	151162	45023.5	94691.5	153052	98395.6	157499
sedoheptulose-7-phosphate_13C_nega	16198.3	N/A	9003.75	6866.04	5764.84	11174.6	8282.08	4262.49	10078.2	10928.8	7162.91	581534	825500	732256	669128	35997.6	1.39456e+06	1.18063e+06	1.20831e+06	962278	12597.6	13038.2	7136.04	23400.8	9417.79	14745.9	6881.18	22298.6	16198.1	9361.57	11939	655862	515703	427411	496795	5374.3	373233	597709	652844	645412
sedoheptulose-7-phosphate_nega	841489	1.33375e+06	1.06361e+06	1.45907e+06	1.35147e+06	1.7348e+06	1.28388e+06	1.66467e+06	1.24115e+06	1.55488e+06	1.08826e+06	134853	214875	160433	156867	2.57974e+06	1.04852e+06	1.02677e+06	1.04782e+06	828518	553157	385111	546210	162565	535844	509460	567964	509413	544707	891329	530585	158929	138783	99678.2	112444	402975	84258.3	138349	132738	118922
serine_13C_posi	N/A	N/A	N/A	N/A	N/A	N/A	N/A	N/A	N/A	N/A	N/A	N/A	N/A	N/A	N/A	N/A	N/A	N/A	N/A	N/A	N/A	N/A	N/A	N/A	N/A	N/A	N/A	N/A	N/A	N/A	N/A	715990	621958	586306	563648	N/A	417470	643437	646719	570002
serine_posi	2.41353e+06	2.59725e+06	2.67578e+06	2.76404e+06	2.76572e+06	6.76226e+06	5.53793e+06	6.55364e+06	4.70844e+06	6.206e+06	1.91598e+06	1.74872e+06	2.28596e+06	1.80767e+06	1.81101e+06	6.76723e+06	7.72701e+06	7.74209e+06	7.63019e+06	5.85078e+06	4.57989e+06	3.56291e+06	4.19562e+06	2.75392e+06	4.20686e+06	3.42002e+06	4.00829e+06	4.12772e+06	3.47951e+06	4.814e+06	4.60441e+06	6.44178e+06	4.79418e+06	4.02846e+06	5.02114e+06	2.82264e+06	2.43605e+06	2.9866e+06	3.32028e+06	3.15702e+06
shikimate-3-phosphate_13C_nega	272029	360205	276221	333056	314919	304892	246238	303866	193646	349159	231293	6838.62	20871.1	8638.47	21235.8	493072	51692.4	33051.5	45231	37065.4	499423	365921	402647	47140.2	427254	447955	603640	616576	558335	868965	556744	79200.2	82062	66224.6	67295.7	385537	80625.6	87825.6	67550	78826.3
shikimate-3-phosphate_nega	14728	13603.3	N/A	6066.09	11494.4	13315.6	14374.1	10448	4708.73	7496.7	N/A	N/A	6486.01	6359.66	9729.12	11506.2	10483	6100.9	6402.2	10098.3	3881.62	3220.62	N/A	17077.7	N/A	8255.47	6175.41	8346.31	9170.96	5328.05	N/A	N/A	9349.2	3594.9	6425.75	10784.6	N/A	8998.61	8806.73	10061.3
sn-glycerol-3-phosphate_13C_nega	N/A	N/A	N/A	N/A	N/A	7906.15	N/A	3571.95	3959.31	N/A	N/A	168984	259906	188671	198293	N/A	731548	471691	434820	495750	N/A	N/A	N/A	N/A	N/A	N/A	N/A	N/A	N/A	4679.04	N/A	710309	636121	708930	633095	N/A	814372	1.48509e+06	1.7127e+06	1.19855e+06
sn-glycerol-3-phosphate_nega	306913	607820	415471	721749	604523	676280	317541	526296	509921	435941	513146	101718	166066	133759	146083	1.12121e+06	565292	349460	440780	397350	500684	447080	631917	87753	707256	1.0934e+06	932740	1.09839e+06	916441	1.49041e+06	696161	136394	134909	148504	93085.4	1.00352e+06	100576	152082	226406	104900
succinate_13(M+4_3)_nega	N/A	4.57527e+06	4.02155e+06	4.42425e+06	4.5253e+06	N/A	2.25813e+06	2.66402e+06	2.08856e+06	2.3983e+06	N/A	185753	259627	202521	211637	N/A	24922.4	14876.7	19602.2	23480.5	N/A	594621	685304	2.28424e+06	743632	N/A	716897	754695	786556	815225	N/A	43672.1	42231.9	36953.1	28316.4	N/A	64809.3	60902	53724.8	42634.9
succinate_13C(M+2_2)_nega	26784.7	622387	506742	489588	533589	21030.9	181659	193886	182981	177448	33963.4	432109	625275	513657	499812	19950.5	259693	255730	272496	213789	21914.3	124490	121217	78685.4	176986	34562.2	179540	166436	169616	204490	17422.6	198018	135538	151304	158714	18403.4	120573	140706	181821	153118
succinate_13C(M+3_2)_nega	N/A	182391	159808	158802	126701	N/A	102133	110372	68625.5	81583.9	N/A	242281	327721	259158	254348	N/A	71508.4	47991.7	63355.5	47984.6	N/A	18671.7	27001.9	48951.5	21596.3	N/A	45593.3	50409.1	39348.5	33101.5	N/A	81086.1	60949.1	66706.6	75824.1	N/A	75305.3	95983.7	96439.4	94058.7
succinate_13C(M+3_3)_nega	N/A	65273.6	58077.2	50362.1	53272.3	N/A	23997.6	44630.3	38419	30215.4	N/A	76316.1	122854	91149.4	83888.7	N/A	19631.1	20157.5	18714	18712.8	N/A	16313	9597.12	22555.7	15355.3	N/A	7625.56	16315.6	8646.54	21119.3	N/A	24604.3	18905.9	30314.5	20415	N/A	36234.6	31482.9	35451	36563.2
succinate_nega	6.28082e+06	1.47065e+06	1.34534e+06	1.44214e+06	1.35852e+06	3.70664e+06	907860	1.12407e+06	896581	1.15922e+06	6.27342e+06	4.06502e+06	5.15911e+06	4.19155e+06	4.8883e+06	4.47785e+06	4.3811e+06	4.05337e+06	4.18774e+06	3.62489e+06	1.44285e+06	541113	541335	539933	609870	1.39835e+06	880854	959517	882783	1.1832e+06	1.33847e+06	1.82493e+06	2.22772e+06	1.57711e+06	1.54238e+06	1.19346e+06	1.32627e+06	1.65576e+06	1.85376e+06	1.63225e+06
thymidine_13C_nega	10463.4	3554.88	8285.18	25097.2	21236.2	22306.7	16198.4	19029.9	14368.4	19069.9	12957.7	15116.7	24475.4	19445.3	18338.7	10741.5	27583.4	16207.9	14396.8	20516.3	10798.1	12238.1	10798	21628.1	20524.3	7083.11	18356.8	8999.56	10797.2	15116.4	9339.2	32034.1	27987.9	10423	18255.3	15477.6	20821.8	11872.3	12943.8	15486.5
UDP-N-acetyl-glucosamine 13C8_nega	N/A	N/A	N/A	N/A	N/A	N/A	N/A	N/A	6118.91	N/A	N/A	6118.86	N/A	5755.86	N/A	N/A	23755.9	21600.3	21657.4	12960.1	N/A	N/A	N/A	N/A	N/A	N/A	N/A	N/A	N/A	N/A	N/A	11158	7918.62	6474.5	13677.6	N/A	N/A	6478.34	9718.23	6118.94
UDP-N-acetyl-glucosamine_13C6_nega	N/A	N/A	N/A	N/A	N/A	N/A	N/A	N/A	N/A	N/A	N/A	6478.86	N/A	4319.21	7198.4	N/A	44632.3	16916.3	35993.7	20516.4	N/A	N/A	N/A	N/A	N/A	N/A	N/A	N/A	N/A	N/A	N/A	7918.64	N/A	7558.69	N/A	N/A	6478.84	15837.2	6478.84	8998.42
UDP-N-acetyl-glucosamine_nega	73786	22316.1	24474.9	29154.9	19796.5	107981	34194	80266.3	47151.7	71627.4	98982.7	N/A	6118.74	N/A	N/A	151538	47111.7	36712.5	24115.7	32034.4	90344.3	8638.58	13677.5	5768.08	13677.1	130659	15837.3	37433.1	30927.6	62988	129218	5025.01	7198.89	N/A	6118.93	79194.4	N/A	N/A	9718.24	N/A
Urea	44354.6	20624.8	N/A	20321.5	67241.4	24460.9	N/A	30947.8	80862	70493.7	42560.1	18449	32165.7	35299.1	15156.3	14954	6936.05	13244.9	17589.6	54969.5	14607.5	19291.9	103527	15839.1	27990.4	38883.4	36219.6	32605.5	46038.2	15205	25658.2	7209.26	106352	39608.8	45132.7	N/A	18003.3	37292.8	30723.1	37120.6
Urea_13C	N/A	6845.31	N/A	N/A	N/A	N/A	N/A	N/A	5054.91	3428.58	8349.67	N/A	7777.35	7394.98	14594.4	N/A	N/A	6726.47	N/A	3990.62	3566.68	4072.46	4934.21	N/A	5901.37	5216.35	8311.97	3924.4	4103.72	4009.14	5315.82	5469.02	13475.7	N/A	4572.37	N/A	N/A	10753.1	N/A	17956.3
uridine_13C_nega	38901.8	11440.9	13989.3	18382.7	29825.6	16567.4	17992.4	N/A	14312.8	N/A	11902.7	7432.1	9209.27	8111.28	8836.78	8882.47	17375.9	20859.9	42381.1	11353.1	14759.7	24386.3	4196.99	7353.85	17286.8	57842.4	8926.16	88711.7	23007.5	86773	12899.4	16508.5	8826.34	24338.9	25609.3	69271	30108.3	61010.4	151431	49842.2

## Sheet: GC-MS labeled parental
	12C Tu8902	Tu8902 U13C5-Gln #1	Tu8902 U13C5-Gln #2	Tu8902 U13C5-Gln #3	Tu8902 U13C6-Glc #1	Tu8902 U13C6-Glc #2	Tu8902 U13C6-Glc #3	12C Miapaca	Miapaca U13C5-Gln #1	Miapaca U13C5-Gln #2	Miapaca U13C5-Gln #3	Miapaca U13C6-Glc #1	Miapaca U13C6-Glc #2	Miapaca U13C6-Glc #3	12C BXPC3	BXPC3 U13C5-Gln #1	BXPC3 U13C5-Gln #2	BXPC3 U13C5-Gln #3	BXPC3 U13C6-Glc #1	BXPC3 U13C6-Glc #2	BXPC3 U13C6-Glc #3	12C HCT116	HCT116 U13C5-Gln #1	HCT116 U13C5-Gln #2	HCT116 U13C5-Gln #3	HCT116 U13C6-Glc #1	HCT116 U13C6-Glc #2	HCT116 U13C6-Glc #3	12C LOVO	LOVO U13C5-Gln #1	LOVO U13C5-Gln #2	LOVO U13C5-Gln #3	LOVO U13C6-Glc #1	LOVO U13C6-Glc #2	LOVO U13C6-Glc #3	12C HT29	HT29 U13C5-Gln #1	HT29 U13C5-Gln #2	HT29 U13C5-Gln #3	HT29 U13C6-Glc #1	HT29 U13C6-Glc #2	HT29 U13C6-Glc #3
Retention Times (min.)
Metabolite
Akg_	31.89	31.88	31.88	31.88	31.9	31.89	31.89	31.89	31.88	31.89	31.89	31.9	31.89	31.89	31.9	31.89	31.88	31.89	31.89	31.89	31.9	31.89	31.89	31.88	31.88	31.9	31.89	31.89	31.89	31.89	31.88	31.88	31.9	31.89	31.89	31.89	31.88	31.88	31.89	31.89	31.89	31.88
Ala_	15.27	15.27	15.27	15.27	15.27	15.26	15.26	15.28	15.27	15.28	15.28	15.28	15.27	15.27	15.28	15.27	15.27	15.26	15.27	15.26	15.27	15.27	15.28	15.27	15.28	15.27	15.26	15.27	15.29	15.29	15.29	15.29	15.29	15.28	15.29	15.28	15.28	15.28	15.28	15.28	15.27	15.28
Ala_	15.27	15.27	15.27	15.27	15.27	15.26	15.26	15.28	15.27	15.28	15.28	15.27	15.27	15.27	15.27	15.27	15.27	15.27	15.27	15.27	15.27	15.28	15.28	15.27	15.28	15.27	15.27	15.27	15.29	15.29	15.29	15.29	15.29	15.29	15.29	15.28	15.28	15.28	15.28	15.28	15.27	15.28
Asn_	38.13	38.12	38.12	38.12	38.12	38.13	38.12	38.13	38.13	38.13	38.13	38.14	38.13	38.13	38.11	38.12	38.12	38.11	38.12	38.13	38.13	38.13	38.13	38.13	38.13	38.13	38.13	38.13	38.13	38.13	38.13	38.13	38.13	38.13	38.13	38.12	38.12	38.12	38.12	38.12	38.13	38.12
Asp_	33.48	33.48	33.48	33.47	33.48	33.48	33.48	33.48	33.48	33.48	33.48	33.48	33.48	33.48	33.5	33.5	33.49	33.5	33.5	33.5	33.5	33.48	33.48	33.48	33.48	33.48	33.48	33.48	33.52	33.53	33.52	33.52	33.52	33.52	33.52	33.5	33.49	33.5	33.5	33.5	33.5	33.49
Asp_	33.48	33.48	33.48	33.47	33.48	33.48	33.48	33.48	33.48	33.48	33.48	33.48	33.48	33.48	33.5	33.5	33.5	33.5	33.5	33.5	33.49	33.49	33.48	33.48	33.48	33.48	33.48	33.48	33.52	33.53	33.52	33.53	33.52	33.52	33.52	33.5	33.49	33.5	33.5	33.51	33.49	33.49
Asp_	33.48	33.48	33.48	33.48	33.48	33.48	33.48	33.48	33.48	33.48	33.48	33.48	33.48	33.48	33.5	33.5	33.5	33.5	33.5	33.5	33.5	33.48	33.48	33.48	33.48	33.48	33.48	33.48	33.52	33.53	33.53	33.53	33.52	33.53	33.53	33.5	33.49	33.5	33.5	33.51	33.49	33.5
Cit_	43.86	43.86	43.86	43.86	43.86	43.85	43.86	43.86	43.86	43.86	43.86	43.86	43.86	43.86	43.84	43.85	43.85	43.85	43.85	43.85	43.85	43.86	43.86	43.85	43.85	43.85	43.85	43.85	43.86	43.86	43.86	43.86	43.86	43.86	43.86	43.86	43.84	43.85	43.84	43.86	43.86	43.85
Cit_	43.85	43.86	43.86	43.86	43.86	43.85	43.85	43.87	43.86	43.86	43.87	43.86	43.86	43.86	43.85	43.85	43.85	43.85	43.85	43.85	43.85	43.86	43.86	43.86	43.85	43.86	43.85	43.85	43.86	43.86	43.86	43.86	43.86	43.86	43.86	43.86	43.84	43.86	43.85	43.86	43.86	43.85
Cys_	34.96	34.97	34.97	34.96	34.97	34.96	34.97	34.98	34.97	34.98	34.97	34.98	34.97	34.97	34.97	34.97	34.97	34.97	34.97	34.97	34.97	34.97	34.97	34.97	34.97	34.97	34.97	34.97	34.97	34.97	34.97	34.97	34.97	34.97	34.97	34.97	34.97	34.96	34.97	34.97	34.96	34.97
Cys_	34.96	34.97	34.97	34.96	34.97	34.97	34.97	34.98	34.97	34.98	34.97	34.98	34.97	34.97	34.97	34.97	34.97	34.97	34.97	34.96	34.97	34.97	34.97	34.97	34.97	34.97	34.97	34.97	34.97	34.97	34.97	34.97	34.97	34.97	34.97	34.97	34.97	34.96	34.96	34.97	34.97	34.97
Fum_	24.45	24.45	24.45	24.45	24.45	24.45	24.45	24.45	24.45	24.45	24.45	24.45	24.45	24.45	24.45	24.45	24.45	24.45	24.45	24.45	24.45	24.45	24.45	24.45	24.45	24.45	24.45	24.45	24.45	24.45	24.45	24.45	24.45	24.45	24.45	24.45	24.45	24.45	24.45	24.45	24.45	24.45
Gln_	41.15	41.15	41.15	41.15	41.17	41.15	41.15	41.18	41.18	41.17	41.18	41.18	41.17	41.18	41.13	41.14	41.14	41.14	41.14	41.14	41.13	41.17	41.17	41.17	41.17	41.17	41.16	41.18	41.15	41.17	41.17	41.15	41.17	41.15	41.16	41.13	41.12	41.12	41.12	41.13	41.12	41.12
Glu_	36.6	36.59	36.59	36.59	36.61	36.6	36.61	36.61	36.62	36.62	36.62	36.62	36.62	36.62	36.59	36.59	36.6	36.6	36.61	36.6	36.6	36.62	36.62	36.62	36.62	36.62	36.61	36.61	36.62	36.62	36.62	36.62	36.62	36.61	36.62	36.61	36.59	36.6	36.6	36.61	36.6	36.6
Glu_	36.61	36.59	36.59	36.59	36.61	36.59	36.61	36.62	36.62	36.63	36.62	36.62	36.62	36.62	36.59	36.59	36.6	36.6	36.61	36.61	36.6	36.62	36.62	36.62	36.62	36.62	36.61	36.61	36.62	36.62	36.62	36.62	36.62	36.62	36.62	36.61	36.59	36.6	36.6	36.61	36.61	36.6
Gly_	16.72	16.71	16.71	16.71	16.72	16.71	16.72	16.73	16.73	16.73	16.73	16.73	16.73	16.73	16.71	16.72	16.71	16.71	16.71	16.72	16.72	16.74	16.74	16.74	16.74	16.73	16.73	16.73	16.73	16.73	16.73	16.73	16.74	16.73	16.73	16.72	16.71	16.72	16.71	16.72	16.72	16.71
Gly_	16.71	16.71	16.71	16.71	16.72	16.71	16.72	16.74	16.73	16.73	16.73	16.74	16.73	16.73	16.71	16.72	16.71	16.71	16.71	16.71	16.72	16.74	16.74	16.74	16.74	16.73	16.73	16.74	16.73	16.74	16.73	16.73	16.74	16.73	16.74	16.72	16.71	16.72	16.71	16.72	16.71	16.72
His_	45.87	45.86	45.87	45.87	45.87	45.86	45.86	45.89	45.88	45.89	45.88	45.88	45.87	45.88	45.84	45.84	45.85	45.85	45.84	45.84	45.84	45.86	45.87	45.86	45.86	45.86	45.86	45.86	45.86	45.86	45.87	45.86	45.86	45.86	45.86	45.85	45.85	45.84	45.84	45.84	45.84	45.84
Ile_	21.07	21.06	21.07	21.06	21.07	21.06	21.07	21.09	21.08	21.09	21.09	21.09	21.08	21.08	21.05	21.06	21.05	21.05	21.05	21.06	21.05	21.08	21.08	21.07	21.07	21.07	21.07	21.07	21.06	21.07	21.07	21.07	21.07	21.07	21.07	21.06	21.05	21.05	21.05	21.05	21.05	21.05
Ile_	21.07	21.06	21.07	21.06	21.07	21.07	21.07	21.09	21.08	21.09	21.09	21.09	21.08	21.09	21.05	21.06	21.05	21.05	21.05	21.06	21.05	21.08	21.08	21.07	21.07	21.07	21.07	21.07	21.06	21.07	21.07	21.06	21.07	21.07	21.07	21.06	21.05	21.05	21.05	21.05	21.05	21.05
Ile_	21.07	21.06	21.07	21.06	21.07	21.07	21.07	21.09	21.08	21.09	21.09	21.09	21.09	21.09	21.05	21.06	21.05	21.05	21.05	21.06	21.06	21.08	21.08	21.07	21.07	21.07	21.07	21.07	21.06	21.07	21.07	21.07	21.07	21.07	21.07	21.05	21.05	21.05	21.05	21.05	21.05	21.05
Lac_	14.01	14	14.01	14.01	14.02	14.01	14.02	14.02	14.02	14.02	14.02	14.02	14.02	14.02	13.99	14	13.99	14	13.99	13.99	14	14.02	14.02	14.03	14.02	14.02	14.02	14.02	14.02	14.02	14.02	14.02	14.02	14.02	14.02	14	14.01	14.01	14.01	14.02	14.01	14.01
Lac_	14.01	14	14.01	14.01	14.02	14.01	14.02	14.02	14.02	14.02	14.02	14.02	14.02	14.02	13.99	14	13.99	14	13.99	13.99	14	14.02	14.02	14.03	14.02	14.02	14.02	14.02	14.02	14.02	14.02	14.02	14.02	14.02	14.02	14	14.01	14.01	14.01	14.01	14.01	14.01
Leu_	19.92	19.91	19.91	19.91	19.92	19.91	19.92	19.94	19.93	19.94	19.93	19.93	19.93	19.94	19.9	19.9	19.9	19.9	19.9	19.9	19.9	19.93	19.93	19.92	19.92	19.92	19.92	19.92	19.92	19.92	19.92	19.92	19.92	19.92	19.92	19.9	19.9	19.9	19.9	19.9	19.9	19.9
Leu_	19.92	19.91	19.91	19.91	19.92	19.92	19.92	19.94	19.93	19.94	19.93	19.94	19.93	19.94	19.9	19.9	19.9	19.9	19.9	19.9	19.9	19.93	19.93	19.92	19.92	19.92	19.92	19.92	19.92	19.92	19.92	19.92	19.92	19.92	19.92	19.9	19.9	19.9	19.9	19.9	19.9	19.9
Lys_	38.41	38.41	38.41	38.41	38.41	38.4	38.41	38.42	38.41	38.41	38.43	38.43	38.43	38.41	38.39	38.39	38.39	38.39	38.39	38.39	38.39	38.41	38.41	38.41	38.41	38.41	38.41	38.41	38.4	38.41	38.41	38.4	38.41	38.4	38.41	38.39	38.39	38.39	38.39	38.39	38.39	38.39
Mal_	32.4	32.4	32.4	32.4	32.41	32.4	32.41	32.41	32.4	32.41	32.41	32.41	32.41	32.41	32.4	32.4	32.4	32.4	32.4	32.4	32.4	32.41	32.4	32.4	32.4	32.4	32.41	32.41	32.41	32.41	32.41	32.4	32.41	32.41	32.41	32.4	32.4	32.4	32.4	32.41	32.4	32.4
Met_	29.73	29.73	29.73	29.73	29.74	29.73	29.74	29.75	29.74	29.74	29.74	29.75	29.74	29.74	29.72	29.72	29.73	29.72	29.72	29.73	29.73	29.74	29.74	29.74	29.74	29.74	29.74	29.74	29.73	29.74	29.74	29.73	29.74	29.74	29.74	29.73	29.72	29.72	29.72	29.72	29.72	29.72
Met_	29.73	29.73	29.73	29.73	29.74	29.73	29.74	29.76	29.74	29.74	29.75	29.75	29.74	29.74	29.72	29.73	29.72	29.72	29.72	29.73	29.73	29.74	29.74	29.74	29.74	29.74	29.74	29.74	29.73	29.74	29.74	29.74	29.74	29.74	29.74	29.73	29.72	29.72	29.72	29.72	29.73	29.72
Met_	29.73	29.73	29.74	29.73	29.74	29.73	29.74	29.76	29.74	29.75	29.75	29.75	29.74	29.74	29.72	29.73	29.72	29.72	29.72	29.73	29.73	29.74	29.74	29.74	29.74	29.74	29.74	29.74	29.74	29.74	29.74	29.74	29.74	29.74	29.74	29.73	29.72	29.72	29.72	29.72	29.73	29.72
Phe_	33.12	33.12	33.12	33.12	33.13	33.12	33.13	33.14	33.13	33.14	33.14	33.14	33.13	33.14	33.12	33.12	33.12	33.12	33.12	33.12	33.12	33.13	33.13	33.13	33.13	33.13	33.13	33.13	33.13	33.13	33.13	33.13	33.13	33.13	33.12	33.11	33.12	33.11	33.12	33.12	33.12	33.12
Phe_	33.12	33.12	33.12	33.12	33.12	33.12	33.12	33.14	33.13	33.14	33.14	33.14	33.13	33.14	33.12	33.12	33.12	33.12	33.12	33.12	33.12	33.13	33.13	33.13	33.13	33.13	33.13	33.13	33.13	33.13	33.13	33.13	33.13	33.13	33.13	33.12	33.12	33.11	33.12	33.12	33.11	33.12
Phe_	33.12	33.12	33.12	33.12	33.13	33.12	33.13	33.15	33.13	33.14	33.14	33.14	33.13	33.14	33.12	33.12	33.12	33.12	33.12	33.12	33.12	33.13	33.13	33.13	33.13	33.13	33.13	33.13	33.13	33.13	33.13	33.13	33.13	33.13	33.13	33.12	33.12	33.11	33.12	33.12	33.12	33.12
Pro_	23.33	23.33	23.33	23.33	23.34	23.33	23.33	23.34	23.33	23.33	23.34	23.33	23.34	23.33	23.33	23.33	23.33	23.33	23.34	23.33	23.33	23.33	23.34	23.34	23.33	23.33	23.32	23.33	23.33	23.33	23.33	23.33	23.34	23.33	23.34	23.33	23.33	23.33	23.33	23.33	23.33	23.33
Pro_	23.33	23.33	23.33	23.32	23.33	23.33	23.33	23.33	23.33	23.33	23.33	23.34	23.34	23.33	23.33	23.33	23.32	23.33	23.33	23.33	23.33	23.34	23.34	23.33	23.34	23.34	23.34	23.34	23.34	23.34	23.33	23.33	23.34	23.34	23.34	23.33	23.33	23.33	23.33	23.33	23.33	23.33
Pyr_	8.61	8.59	8.58	8.59	8.6	8.58	8.59	8.59	8.59	8.59	8.59	8.58	8.57	8.58	8.61	8.59	8.59	8.59	8.59	8.59	8.61	8.58	8.59	8.59	8.59	8.58	8.57	8.59	8.61	8.59	8.61	8.59	8.59	8.58	8.59	8.61	8.6	8.6	8.6	8.61	8.59	8.61
Ser_	28.12	28.12	28.12	28.12	28.13	28.12	28.13	28.15	28.14	28.15	28.15	28.15	28.14	28.15	28.12	28.12	28.12	28.12	28.12	28.12	28.12	28.14	28.14	28.14	28.14	28.14	28.13	28.14	28.14	28.14	28.14	28.14	28.15	28.14	28.14	28.12	28.11	28.11	28.11	28.12	28.12	28.11
Ser_	28.12	28.12	28.12	28.12	28.13	28.12	28.13	28.15	28.14	28.15	28.15	28.15	28.14	28.15	28.12	28.12	28.12	28.12	28.12	28.12	28.12	28.14	28.14	28.14	28.14	28.14	28.13	28.14	28.14	28.14	28.14	28.14	28.15	28.14	28.14	28.12	28.11	28.11	28.11	28.12	28.11	28.11
Ser_	28.12	28.12	28.12	28.12	28.13	28.12	28.13	28.16	28.15	28.15	28.15	28.15	28.14	28.15	28.12	28.12	28.12	28.12	28.12	28.12	28.12	28.14	28.14	28.14	28.14	28.14	28.14	28.14	28.14	28.14	28.14	28.14	28.15	28.14	28.14	28.12	28.12	28.12	28.12	28.12	28.12	28.12
Suc_	23.98	23.98	23.98	23.98	23.98	23.98	23.99	23.98	23.98	23.98	23.98	23.98	23.98	23.99	23.98	23.98	23.98	23.97	23.99	23.98	23.98	23.98	23.98	23.98	23.98	23.98	23.98	23.99	23.98	23.98	23.98	23.98	23.98	23.98	23.98	23.98	23.98	23.98	23.98	23.98	23.98	23.98
Thr_	28.73	28.72	28.72	28.72	28.73	28.72	28.73	28.75	28.73	28.74	28.74	28.74	28.73	28.74	28.71	28.7	28.7	28.71	28.71	28.71	28.71	28.75	28.74	28.73	28.74	28.74	28.73	28.74	28.73	28.72	28.72	28.72	28.74	28.74	28.74	28.72	28.71	28.71	28.71	28.72	28.71	28.71
Thr_	28.73	28.72	28.72	28.72	28.74	28.72	28.73	28.75	28.73	28.74	28.74	28.75	28.73	28.74	28.71	28.7	28.7	28.71	28.71	28.71	28.71	28.75	28.74	28.73	28.74	28.74	28.73	28.75	28.73	28.72	28.72	28.72	28.74	28.74	28.74	28.72	28.71	28.71	28.71	28.72	28.71	28.71
Tyr_	45.41	45.41	45.42	45.41	45.41	45.41	45.41	45.44	45.43	45.43	45.43	45.43	45.41	45.44	45.38	45.38	45.38	45.39	45.39	45.38	45.39	45.42	45.42	45.41	45.41	45.41	45.4	45.41	45.41	45.41	45.41	45.4	45.41	45.4	45.4	45.39	45.38	45.39	45.38	45.39	45.39	45.39
Val_	18.84	18.83	18.83	18.83	18.84	18.83	18.84	18.86	18.85	18.85	18.85	18.86	18.85	18.86	18.83	18.83	18.82	18.83	18.83	18.83	18.83	18.85	18.85	18.84	18.85	18.84	18.84	18.84	18.83	18.84	18.84	18.83	18.85	18.83	18.84	18.83	18.82	18.82	18.82	18.83	18.83	18.83
Val_	18.84	18.83	18.83	18.83	18.85	18.83	18.85	18.87	18.85	18.85	18.85	18.86	18.85	18.86	18.83	18.83	18.83	18.83	18.83	18.83	18.83	18.85	18.85	18.84	18.85	18.84	18.84	18.84	18.84	18.84	18.84	18.83	18.85	18.84	18.84	18.82	18.82	18.82	18.82	18.83	18.83	18.83
Val_	18.84	18.83	18.83	18.83	18.85	18.83	18.84	18.86	18.85	18.86	18.85	18.86	18.85	18.86	18.83	18.83	18.83	18.83	18.83	18.83	18.83	18.85	18.85	18.84	18.85	18.84	18.84	18.84	18.84	18.84	18.84	18.84	18.84	18.83	18.84	18.83	18.82	18.82	18.82	18.83	18.83	18.82
Totial ion counts
Fragment
Akg_ 346	215363	206126	222596	167999	217511	170460	197957	299613	276997	284811	228426	290204	257143	225766	36512	41390	30650	45278	37767	55232	38591	238760	353197	209716	215254	248494	204198	306229	240237	260802	222198	212605	370161	252878	304608	232072	194910	189271	68891	227462	196426	176785
Ala_ 232	1068253	1017897	831567	766905	1200632	1038541	1313834	1834797	1480680	1348219	1619400	1797182	1394424	1539311	344378	342358	333739	369345	351124	431147	389092	1849451	1755541	1361960	1595694	1911729	1498141	1904434	5755933	6214380	5679188	5614130	9377222	6896727	7011653	3790086	3062649	3418243	3508040	5324293	3851371	3692809
Ala_ 260	830543	813632	638118	600908	919511	820602	1005584	1429707	1190183	1042633	1247631	1412641	1076967	1212784	271165	272951	256029	279010	273912	341610	295800	1452354	1391838	1045830	1218908	1488700	1159722	1476826	4644566	4944025	4409492	4342338	7453463	5449984	5535479	3036068	2423036	2647989	2710100	4177364	3018111	2906933
Asn_ 417	105150	113992	83216	82052	110302	85778	106889	126844	136139	102260	105607	142581	96352	94045	32255	46436	30981	32504	40719	49423	44301	1963352	2957426	1823876	2138594	2533500	1689558	2395386	629279	585897	541607	426053	749815	549793	579802	462618	312354	387279	370334	575876	502682	366299
Asp_ 302	2154994	1876398	1732433	1578866	2235777	1974332	2387784	1840077	1713001	1342534	1472079	2220051	1247923	1498044	7013992	8140336	6564244	7098516	7234534	9928592	7580278	3556605	4716010	2573310	3002281	3436356	2508748	3282233	32633274	28209149	24648113	23910731	36548948	28978953	28858914	9209586	5163591	6599720	5594118	9081617	6713300	5644532
Asp_ 390	827455	733506	667652	612384	878076	751238	939086	721806	663499	521941	571492	862236	478686	579535	2686615	3051281	2475888	2693220	2753589	3761137	2901743	1368023	1773300	983317	1148256	1309527	953092	1279420	12802263	11019124	9690194	9358311	14524493	11399457	11501759	3653481	1996110	2545128	2169961	3576921	2596506	2214849
Asp_ 418	1847607	1588553	1439550	1315109	1902404	1648688	2039651	1601155	1441443	1124928	1213408	1896824	1030419	1245450	6044321	6733840	5436713	5901743	6070468	8497286	6506948	2998664	3926062	2091729	2444357	2859155	2079989	2808679	30542752	25898047	22604454	21794983	34493345	26935757	27166361	8318837	4392591	5664932	4758982	8090252	5864257	4968154
Cit_ 459	588682	564290	452248	431286	494661	434889	499719	450074	476628	367227	390817	598982	488480	459144	863819	1179671	929944	937554	833451	1177854	826819	970921	1343952	701879	716398	934343	712717	942994	1952716	1568316	1346234	1396972	1949366	1580728	1574116	1464672	715286	803629	654976	1454210	1092695	888124
Cit_ 591	411168	388461	319782	299733	347481	304250	347336	331589	333499	257285	273928	421164	346010	319938	598058	804511	654624	667114	589260	812329	588366	689121	933189	497624	501998	648829	501879	655182	1385066	1115162	969424	969417	1371620	1119929	1104948	1051247	513784	563070	454640	1008672	766585	632427
Cys_ 378	2878337	2731597	2679479	2464539	3057241	2861086	3464516	4914240	4607183	4427952	4310429	6294604	3774008	4822494	2847360	3641394	2499631	3058329	3086598	3904885	3324836	4474158	4550567	3226397	3893682	3812653	3299637	3719678	3535309	2921336	3007891	2720863	3187365	2700444	2779040	3080424	2079897	1891861	2183236	2833294	2923346	2447292
Cys_ 406	3228694	3020605	2950560	2692774	3353872	3185414	3862506	5541227	5165445	4894147	4770880	7303501	4198369	5456039	3189663	4132926	2760016	3361152	3417612	4436160	3696557	5083647	5092677	3568995	4272808	4282015	3696769	4198859	4050785	3243430	3307364	2971208	3535881	2961536	3085410	3451151	2303155	2071211	2380552	3125128	3283429	2726592
Fum_ 287	801565	761681	669885	630407	795370	737874	840796	677368	608014	525265	543542	742807	535235	644173	672909	759360	647874	630408	689364	843261	710365	684498	750798	560310	567606	705607	615217	728673	983419	998103	914660	904889	1375766	980249	1047760	1117524	820371	837447	728712	1158653	942942	780003
Gln_ 431	29146040	45468128	33872943	30110719	38295152	30014192	31692781	73408575	81011809	76387033	57715620	79368235	51371117	49102379	20497793	36856979	26850891	27121477	26446389	32801542	24842758	45929339	91265011	50527137	62759547	62905273	40425642	59040479	32006600	46372647	47003708	28613511	44837104	31896082	35124370	18540132	14685354	13435530	13164596	18875289	21600584	13769845
Glu_ 330	18937471	20355624	15733516	14602869	19683996	17493014	20114269	45488972	43159753	39144376	41686341	58949357	40349757	43353883	16740735	20654272	16123940	17393503	18017452	23234167	18591911	31704840	39167433	26960342	29203429	35906371	28808296	34625986	54850502	52185193	47798978	46638947	69483416	54565989	54332498	23591248	16464951	19106306	19051880	25992359	25315179	17689699
Glu_ 432	32711759	35557200	27225659	25167930	33899334	29790255	34949341	82396364	78166420	71187570	76476356	106605327	72404672	77827651	28727188	35975380	27915103	30479311	30957016	40382429	32191101	56704282	70834836	48332660	52611408	63871779	50878294	62125189	99320181	95911637	87799181	85679848	127044246	99616474	99072958	41236855	28605859	33606981	33552432	45708468	44321439	30697210
Gly_ 218	8448610	8656818	7469295	7032299	9124466	8258641	9467795	17745017	15319197	14597873	14409741	17342521	14269674	15553489	7922785	8541558	7869189	8276832	8317028	9287588	8626986	20055930	20144087	16295484	17820191	19254992	16482511	18696007	15826990	16079574	15364611	13690335	20187479	15904246	16127664	9301499	6391127	8221766	7118811	9135057	8551257	7281516
Gly_ 246	6994669	7379165	6069679	5718418	7443156	6828196	7844416	14896045	13039629	11966519	11875970	14657794	11927159	13032873	6569284	7054789	6421868	6741169	6804808	7716936	7085293	16991387	17003542	13430798	14750771	16329357	13874173	15708225	13490221	13459332	12740016	11228252	17078797	13309502	13526999	7795549	5265235	6739770	5747316	7534008	7071514	5980160
His_ 338	2268510	1846872	1915160	1858576	2077167	1744608	1873727	4773591	3163495	3753088	3383027	4228488	3449169	3381469	1271139	1426728	1216232	1305697	1222276	1461625	1171214	3071812	4899459	2490972	2888803	2645566	2025216	2678982	2382632	2009697	2377512	1808969	2072446	1591043	1678955	1394294	761924	722492	795542	1082054	1191749	894738
Ile_ 200	26650446	25375243	22670124	20620984	27653394	25705792	29566879	48854554	37481151	37469086	36447940	45471732	40569271	42241818	16735804	18916289	14591384	16019683	17230629	18672012	17929523	37059896	33905772	26192523	29674956	29728122	27636087	29057961	28208530	24614265	25067001	22254820	30275538	24644615	24704566	16117739	11854673	11233301	11791477	14894340	15949927	14878926
Ile_ 274	12031543	11025571	10071896	9175368	12361519	11438543	13326316	22715340	16638581	17111210	16615398	20671430	18440415	19483279	7395747	8125011	6418556	7076645	7562629	8187884	7939396	16965995	15179261	11806690	13379844	13268326	12350865	13086725	12419524	10925635	11257154	9951216	13542299	11023109	11050681	7082221	5208900	4916921	5162294	6551040	6998627	6543777
Ile_ 302	13698260	12735772	11231214	10166436	13926720	12991250	15222385	26510193	19311820	19428218	18816845	24187651	21280729	22570741	8280821	9319983	7045384	7765567	8382346	9231489	8876614	19602159	17321830	13103878	15024266	15137439	13999980	14908840	14574881	12322639	12556936	11053581	15435088	12414700	12553760	7995482	5729654	5387692	5620658	7204713	7798621	7265338
Lac_ 233	14181432	13897992	13007256	12406279	18008807	15552730	18959725	30846996	25643508	27238888	28840871	32212543	26755087	28786308	9723454	10669660	9930319	10505185	10602808	12275368	11160567	25952765	28055976	21174590	24179611	23590629	20830388	23572039	24039068	28525778	28735777	26817522	38541711	28216756	28724544	12224556	13441007	12305039	13942286	17639409	16468365	15012335
Lac_ 261	24972734	24556448	22570338	21426368	31809279	27597529	33764184	55854366	46419668	48510992	51580528	58733056	48423538	52234145	16819607	18284663	16900306	17973073	18249633	21471301	19296954	46557707	50505604	37360157	42940589	42368967	37228547	42205329	43452160	51452197	51543647	47945784	70893104	51175367	52040364	21420776	23334649	21182635	24149765	31220519	29045620	26430988
Leu_ 274	12401520	11161991	10406166	9471720	12712764	11744738	13735593	23556285	17156207	17754947	17264356	21412358	19175243	20309417	7631600	8102067	6594395	7304968	7802019	8492017	8260647	17518898	15509592	12103231	13692279	13623161	12683692	13403566	12832340	11326106	11637149	10318344	14115261	11407454	11533683	7356795	5246765	5017073	5280025	6637260	7142819	6603656
Leu_ 302	9949039	9063972	8206757	7425815	10108521	9468573	11099716	19464005	14031084	14221803	13822834	17661783	15651422	16690149	6081998	6509371	5126634	5700016	6122626	6738977	6498925	14335755	12488186	9557722	10834408	10968304	10185044	10773476	10656261	9016362	9215962	8082587	11314663	9101894	9242979	5832703	4088833	3881514	4059403	5200331	5617716	5202791
Lys_ 431	2895472	3370392	2529285	2277449	3209513	2720388	3241500	6346374	4738122	4644105	4040780	6187217	5633577	5010726	1341822	1613466	1170232	1245818	1385905	1825404	1451918	3044479	3729718	2051590	2669380	2488528	2323909	2482464	2390043	2346043	2550180	1782893	2765840	2178945	2251435	1531714	1224263	993459	1117599	1416576	1983106	1560517
Mal_ 419	1548784	1526818	1311961	1244667	1614341	1498994	1736144	1377790	1423241	1066141	1157268	1663013	1134059	1261696	1416612	1535901	1276033	1346998	1409522	1998482	1528721	1491046	1896813	1125021	1167070	1535502	1240637	1544371	2318842	1845760	1589085	1601819	2474331	1964804	2001499	2374860	1497254	1791722	1838780	2504539	2032286	1692006
Met_ 218	2977266	2859967	2479449	2300135	3133266	2922076	3327002	5988005	4909791	4500690	4454981	6012471	4915921	5261495	2024862	1895375	1753353	1904058	2101610	2371105	2215229	4714007	5256054	3524588	3930761	4355090	3884426	4235088	3030967	2917182	2984059	2654760	3776420	3016430	3042328	1889388	1402468	1298455	1380733	1797538	1970232	1729612
Met_ 292	2660379	2571579	2252636	2060398	2776933	2598776	2964744	5415388	4377615	4060050	3972593	5338000	4381803	4705209	1796676	1703585	1579659	1698899	1862353	2083030	1974814	4255916	4701539	3147893	3530388	3872026	3469321	3788446	2709998	2624268	2697825	2350253	3320798	2702784	2749256	1712952	1277422	1178133	1228920	1603253	1742895	1551996
Met_ 320	1981658	1917551	1632655	1494394	2031665	1927398	2176830	4040750	3368940	2968256	2920468	4063907	3282449	3536624	1348536	1270658	1145855	1227262	1367996	1561378	1461832	3182149	3593642	2307738	2569276	2889995	2571218	2798298	2040930	1954709	1955993	1712536	2457812	1976117	2000762	1254791	934175	837680	880488	1169005	1264551	1131396
Phe_ 234	6665829	6081498	5546581	5026008	6803254	6406700	7179484	12574697	9675501	9600378	9404418	13428743	10504287	11138250	4522230	4693883	3784088	4174472	4472085	5690773	4663048	9710354	12306895	6837421	7806217	8197268	7347018	7842644	7637406	6477689	6618606	6047852	8153448	6634359	6593294	4224550	3088362	2929106	3075865	4012906	4330140	3804231
Phe_ 302	9644664	8764325	7873508	7053420	9642875	9148068	10397349	18865649	14173781	13925152	13625665	20221894	15377367	16447769	6456856	6819423	5320002	5764364	6312302	8289126	6655922	14287505	18580644	9767844	11090011	11866642	10598004	11394926	11276412	9327374	9419831	8531236	11754203	9546907	9517128	6044456	4347675	4091260	4258810	5673374	6191868	5379697
Phe_ 336	4681048	4188400	3777295	3385322	4658464	4423213	5030944	9236393	6798630	6718541	6595475	9745328	7504417	7989084	3132156	3267065	2550366	2764820	3016209	4014950	3199477	6992559	8904494	4701546	5346132	5726447	5106570	5510499	5445555	4467740	4528524	4081151	5628633	4589994	4601761	2937868	2100810	1976551	2049489	2745096	2996960	2626041
Pro_ 258	136056	111938	109837	86782	123714	111444	143560	129373	116797	97922	120141	163574	175755	167681	61723	67325	51708	71704	62424	82375	64479	26209	17318	12121	11219	12190	12688	9806	402194	432569	323586	445562	725579	629632	530730	607925	385618	571165	450681	748789	513048	522766
Pro_ 286	87551	71283	70223	52216	79703	78013	90766	83892	81841	61163	76376	109907	113344	107478	43145	46859	33448	47223	40464	56012	42343	19934	16645	9716	9980	14362	11692	12937	276507	275655	206689	275365	483331	410258	352583	406986	253876	352608	274658	498142	338752	347528
Pyr_ 174	1691573	1617116	1571018	1583018	1836483	1817538	2153935	1231274	891144	856108	1232784	1203721	1273263	1444741	910247	823690	803067	781899	929629	1094306	1004592	2075892	1797534	1458597	1480244	1475046	1508053	1465726	3382743	3605803	3572321	3580287	5149201	3970532	3860858	2025404	1876759	1630636	1766957	2131617	2852655	2195445
Ser_ 288	8541935	8741992	7273344	6744220	8649913	8102657	9214354	21510377	15880691	15797424	15433869	20950515	15846126	17658463	6557862	7680611	5763834	6175981	6627761	7131608	6935565	15003749	13822635	10720897	12067570	12586255	11182761	12127737	15061339	13229922	12992856	11376266	16765069	13701660	13759869	6667241	4400350	4290836	4414763	5821290	6005892	5232520
Ser_ 302	4535545	4672126	3856036	3545834	4591944	4321142	4904204	11522456	8492151	8427228	8263623	11263135	8497772	9492211	3505017	4078114	3054817	3265234	3536998	3806887	3700151	8067862	7403466	5732461	6431581	6725968	6003844	6524909	8053733	7066390	6917730	6008490	8981689	7354082	7395463	3566277	2328271	2289618	2353420	3089948	3193585	2789840
Ser_ 390	8588022	8639361	7111043	6564975	8523067	8034630	9221464	22953729	16163616	16211780	15805229	21916750	16524147	18586135	6579712	7546253	5613433	6035124	6510974	7040118	6904266	15621443	14012129	10796275	12189857	12674802	11373166	12422728	15643356	13430694	13171669	11425891	17325254	14099963	14265925	6685740	4297770	4128448	4255251	5669189	5888335	5159524
Suc_ 289	1588733	1538355	1203950	1154075	1510138	1334507	1643256	227512	216575	150305	150099	202362	161817	183499	101689	91131	65611	69355	80651	98933	84029	534894	322858	240831	287591	297969	241694	300502	382960	238603	242044	223883	272707	243353	253110	492182	315200	323864	275621	391210	340474	354770
Thr_ 376	5887245	4238055	3648219	3477576	5483255	4635553	6182832	12740536	6287438	6744354	6342999	11162207	6007714	7758073	2952235	2087975	2002429	2338585	2677103	3052407	3151383	9522609	6655660	4690840	6870505	8781182	5898205	9808283	6224124	4606095	4202780	3647028	8037189	6806684	7806028	4641104	2230944	2450572	2590895	4671161	3800896	3575135
Thr_ 404	10647115	7515967	6364700	6031841	9790346	8315775	11160722	23771182	11317023	12074058	11285451	20775354	10833552	14100009	5197462	3594361	3393710	4050014	4639428	5410526	5540580	17570582	12057718	8258485	12345201	16160363	10645151	18122287	11351099	8193895	7361012	6428830	14676474	12354033	14226397	8350421	3845408	4219874	4452557	8328102	6765814	6299740
Tyr_ 466	5375574	5293329	4427752	3968235	5488123	5004336	5301938	9464937	8139241	7524953	7345809	8926645	9650899	8732582	3310564	3758120	2857100	3024936	3407422	4437014	3283866	7140558	10691166	5428224	6100678	6623081	5614136	6363343	5096655	4838455	4956293	4422067	5842092	4552186	4524272	3301044	2355328	2228857	2238026	3119695	3498413	2722189
Val_ 260	10685687	9835575	8914808	8158296	11045640	10188679	11948319	20498609	14218636	15284822	14819292	18242284	16466876	17446094	6629340	6797826	5674930	6236378	6689555	7268581	7046588	14634339	13100833	10068866	11620056	11441155	10621663	11395741	11244152	10013641	10331782	9114774	12385477	10043913	10181347	6465535	4735894	4478651	4774685	5996999	6383925	6028075
Val_ 288	7702274	7188173	6293689	5707472	7851350	7367734	8625674	15181932	10326713	10965289	10563869	13447640	12064406	12743461	4721510	4880647	3935902	4332280	4666922	5162431	4979886	10656769	9415200	7071579	8209825	8256713	7632858	8204791	8372211	7119670	7281195	6356586	8923941	7214449	7291598	4638734	3303403	3096338	3292119	4189077	4511869	4238706
Val_ 302	3870144	3613046	3150343	2850366	3954067	3679003	4334139	7674455	5190642	5486856	5304132	6737281	6035491	6397348	2363198	2453005	1975040	2173309	2346974	2599840	2493472	5341476	4718551	3552202	4113206	4154694	3828468	4127833	4224079	3591789	3662760	3201881	4472330	3612077	3668588	2327381	1667951	1548992	1656429	2105799	2260898	2122991
Mass isotopomer abundances
Ion
Akg_346 (M0)	1.0015	0.0364	0.0311	0.0338	0.8227	0.8107	0.8329	1.003	0.0388	0.0487	0.0408	0.8331	0.8175	0.835	1.0814	0.107	0.1047	0.0728	0.7159	0.6766	0.7435	0.994	0.0321	0.0306	0.0417	0.7934	0.7884	0.7879	1.0038	0.0996	0.092	0.1023	0.6647	0.6562	0.6532	1.0055	0.0554	0.0586	0.0717	0.6983	0.7646	0.7387
Akg_347 (M1)	0.0075	0.0276	0.0198	0.0211	0.0075	0.014	-0.0029	0.0008	0.0199	0.0137	0.0234	0.008	0.0141	-0.0062	-0.047	0.0693	0.0673	0.0788	0.0163	0.0072	0.0004	0.006	0.0279	0.024	0.0247	0.0067	0.0041	0.008	-0.0028	0.0782	0.0713	0.0783	0.0083	0.0214	0.0166	-0.0039	0.0437	0.0458	0.0273	0.0144	0.0031	0.0114
Akg_348 (M2)	-0.0029	0.0271	0.0186	0.0191	0.1288	0.1339	0.1252	0.0016	0.026	0.0262	0.0241	0.1129	0.1175	0.1149	-0.0281	0.0205	0.022	0.0461	0.1882	0.2127	0.1964	0.0043	0.0309	0.0246	0.0248	0.1524	0.1549	0.1562	0.003	0.0692	0.0708	0.0575	0.1825	0.1819	0.1879	0.0035	0.0531	0.0416	0.0388	0.1908	0.1557	0.1571
Akg_349 (M3)	-0.0064	0.128	0.1184	0.1146	0.0137	0.0043	0.0191	-0.0031	0.1203	0.1152	0.1005	0.0141	0.0152	0.0186	-0.0086	0.2155	0.232	0.2381	0.0204	0.0333	0.0148	-0.001	0.1457	0.149	0.1363	0.0156	0.016	0.0153	-0.0011	0.1807	0.1693	0.181	0.046	0.0424	0.0476	-0.0025	0.1553	0.1677	0.14	0.0348	0.034	0.0301
Akg_350 (M4)	0.0001	0.0283	0.0305	0.0364	0.0259	0.0433	0.0305	-0.003	0.0328	0.0338	0.0343	0.0267	0.0313	0.0368	0.0018	0.0179	0.0254	-0.0192	0.072	0.0681	0.0461	-0.0038	0.0276	0.0313	0.033	0.0304	0.0366	0.0309	-0.0035	0.0272	0.0272	0.025	0.0726	0.0783	0.0675	-0.0032	0.0244	0.0313	0.0209	0.0487	0.0369	0.0653
Akg_351 (M5)	0.0002	0.7532	0.7842	0.7904	0.0056	-0.0026	-0.002	0.0005	0.7608	0.769	0.7764	0.0082	0.0102	0.0062	0.0006	0.5961	0.5937	0.5966	-0.0074	0.012	-0.0012	0.0004	0.734	0.7408	0.7376	0.0062	0.0053	0.0059	0.0004	0.5431	0.5803	0.5621	0.0294	0.0237	0.0324	0.0005	0.6692	0.6624	0.7002	0.02	0.0088	0.0041
Akg_352 (M6)	0	0.0024	0.0017	-0.0078	-0.0043	-0.0042	-0.0033	0.0002	0.0041	-0.0078	0.0053	-0.0023	-0.0058	-0.0055	-0.0001	-0.0043	-0.0144	-0.0032	-0.0063	-0.0103	0.0007	0.0002	0.0048	0.0016	0.0067	-0.005	-0.0054	-0.0043	0.0002	0.0047	-0.0059	-0.005	-0.001	-0.0008	-0.0016	0.0002	-0.0007	-0.0076	0.0041	-0.0058	-0.0021	-0.007
Akg_353 (M7)	0	0.0006	0.0015	-0.0032	-0.0001	0.0004	0.0003	0	0.0004	0.0022	-0.0003	-0.0008	-0.0004	-0.0001	0	-0.0249	-0.0315	-0.0034	0.0008	-0.0003	-0.0008	0	-0.0012	0.0031	-0.0012	-0.0001	-0.0001	-0.0003	0	0.0009	-0.0011	0.0026	-0.0025	-0.0034	-0.0039	0	0.005	0.0057	-0.0009	-0.0016	-0.0011	-0.0001
Akg_354 (M8)	0	-0.0022	-0.0048	-0.0037	0.0003	0.0002	0.0002	0	-0.0016	-0.0002	-0.0034	0.0002	0.0004	0.0003	0	-0.0031	-0.0009	-0.0071	0.0003	0.0006	0	0	-0.0002	-0.0039	-0.0024	0.0003	0.0003	0.0003	0	-0.0027	-0.0036	-0.003	-0.0001	0.0001	0.0002	0	-0.0054	-0.0045	-0.0006	0.0004	0.0002	0.0004
Akg_355 (M9)	0	-0.0017	-0.0014	-0.0011	0	0	0	0	-0.0019	-0.0006	-0.0015	0	0	0	0	0.0071	0.0016	0	-0.0001	0	0.0001	0	-0.0019	-0.0016	-0.0015	0	0	0	0	-0.0011	-0.0008	-0.0012	0.0001	0.0002	0.0002	0	-0.0003	-0.0014	-0.0018	0.0001	0.0001	0
Ala_232 (M0)	1.0024	0.9413	0.9324	0.9379	0.1331	0.1475	0.1295	1.0025	0.8965	0.9009	0.9028	0.1699	0.191	0.1789	1.0033	0.9895	0.9909	0.9862	0.2304	0.2375	0.2366	0.999	0.9381	0.9377	0.9399	0.1287	0.1386	0.1301	1.0002	0.9403	0.9415	0.943	0.1207	0.1266	0.1238	1.0034	0.9358	0.9343	0.9319	0.0924	0.1041	0.1008
Ala_233 (M1)	-0.0017	0.0114	0.013	0.0081	0.026	0.0238	0.0253	-0.0037	0.0177	0.0124	0.0131	0.028	0.0285	0.0298	-0.0053	-0.0002	0	0.0046	0.0152	0.0179	0.0205	0.0017	0.0122	0.0121	0.0104	0.027	0.025	0.0273	0.0012	0.0125	0.0126	0.0099	0.0274	0.0284	0.0278	-0.0038	0.0124	0.0124	0.0152	0.0284	0.0281	0.0283
Ala_234 (M2)	0.0001	0.047	0.0553	0.0551	0.8417	0.8312	0.8467	0.0022	0.087	0.0878	0.0839	0.8034	0.7802	0.7934	0.0062	0.0124	0.01	0.0111	0.7532	0.7475	0.7418	0	0.0506	0.0512	0.0519	0.8457	0.8395	0.8439	-0.0015	0.0471	0.0453	0.0474	0.8535	0.8465	0.852	0.0009	0.0523	0.0536	0.0539	0.8808	0.871	0.8731
Ala_235 (M3)	0.0002	0.001	0	-0.0001	-0.0011	-0.0033	-0.001	-0.0008	-0.0005	-0.0005	0.0011	0.0004	0.0008	-0.0028	-0.0025	0.0013	0.0014	0.0009	0.0015	-0.001	0.0022	-0.0001	-0.0003	-0.0001	-0.0018	-0.0018	-0.001	-0.0006	0.0002	0.0004	0.0007	0	-0.0015	-0.0012	-0.004	-0.0001	-0.0004	0.0005	-0.0004	-0.0026	-0.0034	-0.0025
Ala_236 (M4)	-0.0009	0.0001	0	-0.0003	0.0006	0.001	-0.0003	-0.0001	0	0.0004	-0.0001	-0.0015	0.0004	0.0011	-0.0021	-0.0033	-0.0025	-0.0032	0.002	-0.001	0.0015	-0.0005	-0.0002	-0.0007	0.0001	0.0003	-0.0014	-0.0002	0	-0.0001	0.0001	-0.0001	0.0001	-0.0001	-0.0001	-0.0003	0.0002	-0.0005	-0.0002	0.001	-0.0003	0.0003
Ala_237 (M5)	0	-0.0008	-0.0008	-0.0007	-0.0001	0.0011	0.0004	-0.0001	-0.0008	-0.0009	-0.0008	0	-0.0004	0.0004	0.0003	0.0002	0	0.0002	-0.0013	0.0003	-0.0016	-0.0001	-0.0005	-0.0002	-0.0006	0.0004	0.0001	-0.0002	-0.0002	-0.0001	-0.0001	-0.0001	-0.0001	-0.0002	0.0005	-0.0001	-0.0002	-0.0002	-0.0003	0	0.0008	0.0005
Ala_238 (M6)	0.0001	0	0	0	-0.0003	-0.0014	-0.0007	0	0	-0.0001	0	-0.0003	-0.0006	-0.0008	0.0001	0.0002	0.0002	0.0002	-0.0014	-0.0013	-0.0012	0	0	0	0	-0.0003	-0.0008	-0.0002	0	-0.0001	-0.0001	-0.0001	0	0.0001	0	0	-0.0001	0	0	0.0001	-0.0001	-0.0003
Ala_260 (M0)	0.9945	0.9372	0.9351	0.9359	0.1257	0.1338	0.1161	0.9977	0.8934	0.8942	0.898	0.1584	0.1705	0.1663	1.0024	0.9798	0.987	0.9881	0.2117	0.2081	0.2064	0.999	0.9379	0.9382	0.9376	0.119	0.1272	0.1182	1.0049	0.9419	0.9382	0.9415	0.1139	0.1211	0.1207	1.0005	0.9333	0.9348	0.9354	0.0882	0.0972	0.0963
Ala_261 (M1)	0.0078	0.0056	0.0053	0.0047	0.0074	0.0043	0.0061	0.0006	0.0133	0.0117	0.011	0.0085	0.0094	0.0095	0.0017	0.0041	-0.0009	-0.0005	0.0023	0.0071	0.0081	0.0038	0.0074	0.0061	0.0046	0.008	0.0094	0.0095	-0.0033	0.0054	0.0085	0.0059	0.0077	0.0081	0.0087	-0.0005	0.0066	0.0047	0.0049	0.0088	0.0082	0.0091
Ala_262 (M2)	-0.0012	0.0075	0.0128	0.0101	0.0302	0.0303	0.0299	0.0025	0.0172	0.0165	0.0136	0.0351	0.0334	0.0338	-0.004	0.0082	0.0064	0.0044	0.0218	0.0239	0.0219	-0.0031	0.009	0.0096	0.0109	0.0305	0.0307	0.0301	-0.0018	0.012	0.0136	0.0108	0.0349	0.0343	0.0341	0.0003	0.0123	0.0133	0.0138	0.0346	0.0335	0.0341
Ala_263 (M3)	-0.0001	0.0454	0.0468	0.0474	0.8399	0.8319	0.8453	-0.0006	0.0743	0.0784	0.0782	0.7968	0.7869	0.7958	0	0.005	0.0088	0.0093	0.7593	0.7606	0.7601	0.0007	0.046	0.0447	0.0466	0.8447	0.8325	0.8443	0.0002	0.041	0.0401	0.0411	0.8479	0.8386	0.8385	-0.0002	0.0459	0.047	0.0458	0.8702	0.8648	0.8625
Ala_264 (M4)	-0.0018	-0.0011	-0.0011	0	-0.0044	-0.0037	0.0006	-0.0003	0.0002	-0.0002	-0.0014	0	-0.0007	-0.0066	-0.0021	-0.0025	-0.0046	-0.0046	0.0017	0.0022	-0.0006	-0.0002	-0.0005	-0.0003	0	-0.0043	-0.001	-0.0035	0.0001	-0.0004	-0.0004	0.0002	-0.0047	-0.0023	-0.002	-0.0002	0.0005	0.0001	0.0003	-0.0016	-0.0049	-0.0022
Ala_265 (M5)	0.0001	0.0017	0.0004	0.0003	0.0011	0.0025	0.0035	0	0.001	-0.0006	0.0011	0.0022	-0.0011	0.0023	0.0002	-0.0003	-0.0002	-0.0002	0.0056	-0.0016	0.0062	-0.0002	-0.0002	0.0013	0.0003	0.0015	0.0003	0.0007	-0.0001	0.0002	0.0001	0.0004	-0.0001	-0.0004	-0.0003	-0.0001	0.0004	0.0003	-0.0002	-0.0002	0.0006	0.0001
Ala_266 (M6)	0.0001	-0.0007	-0.0005	-0.0006	-0.0001	-0.0002	-0.0011	0	-0.0009	-0.0004	-0.001	-0.0011	0.0001	-0.0001	0.0001	0.0002	0.0003	0.0003	-0.0042	-0.0032	-0.005	0	-0.0003	-0.0005	-0.0006	0.0001	0	0.0002	0	-0.0002	-0.0001	-0.0002	0.0002	0.0003	0	0	-0.0001	-0.0005	-0.0003	0.0002	0.0001	-0.0002
Ala_267 (M7)	0.0007	0.0056	0.0014	0.0027	0.0005	0.0015	-0.0006	0.0003	0.0017	0.0004	0.0006	0.0001	0.0019	-0.0011	0.0022	0.0069	0.0039	0.0039	0.0019	0.0034	0.0034	0.0001	0.0008	0.0012	0.0008	0.0008	0.0013	0.0009	0	0.0003	0	0.0002	0.0002	0.0004	0.0004	0.0003	0.0015	0.0004	0.0004	0	0.0008	0.0006
Ala_268 (M8)	-0.0001	-0.0008	-0.0002	-0.0004	-0.0002	-0.0004	0	0	-0.0002	0	0	-0.0001	-0.0004	0	-0.0003	-0.0011	-0.0006	-0.0006	-0.0001	-0.0004	-0.0003	0	-0.0001	-0.0002	-0.0001	-0.0003	-0.0003	-0.0003	0	0	0	0	-0.0002	-0.0002	-0.0002	0	-0.0002	0	0	-0.0002	-0.0003	-0.0002
Asn_417 (M0)	0.9485	0.16	0.15	0.1343	0.8156	0.8	0.7883	0.9403	0.1762	0.1861	0.1997	0.7425	0.7408	0.7702	0.9028	0.4487	0.4481	0.4417	0.7842	0.7595	0.8002	0.9722	0.1156	0.1096	0.1069	0.7921	0.7935	0.789	0.9232	0.274	0.2789	0.2721	0.7292	0.7546	0.7389	0.9661	0.2184	0.2111	0.2129	0.7373	0.7573	0.7604
Asn_418 (M1)	0.0328	0.0338	0.0416	0.0391	0.0231	0.0302	0.0116	0.0319	0.0235	0.0102	0.0037	0.0291	0.0458	0.0252	0.0929	0.0084	0.0908	0.0958	0.0405	0.0388	0.0165	0.0142	0.0373	0.0386	0.0357	0.0237	0.0266	0.0253	0.0151	0.0571	0.0592	0.0698	0.0364	0.0323	0.0349	0.0185	0.0532	0.0598	0.0515	0.0224	0.0296	0.0216
Asn_419 (M2)	0.0164	0.14	0.1191	0.1224	0.0917	0.1044	0.1098	0.0164	0.1059	0.1121	0.1102	0.0915	0.0832	0.1118	0.0035	0.1208	0.1105	0.1032	0.1116	0.0819	0.123	0.0017	0.1236	0.1238	0.1228	0.1201	0.1184	0.1173	0.0024	0.1182	0.1202	0.1152	0.0865	0.0892	0.0931	0.0013	0.1248	0.1241	0.1322	0.1156	0.1105	0.1085
Asn_420 (M3)	0.0152	0.1187	0.1304	0.153	0.0606	0.0594	0.0754	0.0212	0.1553	0.1597	0.1555	0.1152	0.0914	0.0883	0.0066	0.0713	0.0653	0.0753	0.0712	0.1118	0.0648	0.012	0.1338	0.133	0.1361	0.0533	0.0514	0.0577	0.0581	0.1702	0.155	0.1452	0.1216	0.1005	0.1131	0.0155	0.1785	0.1742	0.162	0.1065	0.0888	0.0879
Asn_421 (M4)	-0.0136	0.5484	0.5725	0.5515	0.0169	0.0118	0.011	-0.01	0.5265	0.5401	0.5428	0.0201	0.032	0.0297	-0.0049	0.3779	0.3198	0.3295	-0.0001	0.0252	0.0033	0.0002	0.5871	0.5905	0.5934	0.0092	0.0098	0.0099	0.0004	0.3764	0.382	0.3958	0.0222	0.0209	0.0201	-0.0006	0.4175	0.4258	0.4359	0.015	0.0133	0.0173
Asn_422 (M5)	-0.0002	0.0127	0.0034	0.0083	-0.005	-0.0028	-0.0014	-0.0002	0.0206	0.0004	0.0072	-0.0066	0.0045	-0.0271	-0.0016	-0.0141	0.0007	-0.0106	-0.0157	-0.0283	-0.0159	0.0002	0.0045	0.007	0.0076	0.0003	-0.0009	0.0003	0.001	0.0053	0.0098	0.0039	0.0021	-0.0006	-0.0008	-0.0005	0.008	0.0107	0.009	0.0035	-0.0022	0.0034
Asn_423 (M6)	0.0012	-0.0016	-0.0035	0.0052	-0.0038	-0.0038	0.0002	0.0005	0.0052	0.0019	-0.0087	0.0033	-0.0097	-0.0003	0.0006	-0.0063	-0.0382	-0.0393	0.0013	0.0002	0.001	-0.0006	-0.0013	-0.0021	-0.0018	0.0007	0.0004	0.0001	-0.0004	-0.0004	-0.0039	-0.0006	0.0008	0.0018	-0.0003	-0.0005	0.0026	-0.0021	0.0016	-0.0007	0.0005	-0.0008
Asn_424 (M7)	-0.0001	-0.0124	-0.015	-0.0139	0.0007	0.0005	0.0044	0	-0.0137	-0.01	-0.0115	0.0061	0.0095	0.0022	0.0001	-0.0082	0.0004	0.002	0.0099	0.0071	0.01	0	-0.0005	-0.0002	-0.0007	0.0006	0.0009	0.0006	-0.0005	-0.0008	-0.0001	-0.0017	0.0023	0.0017	0.0004	0.0001	-0.0016	-0.002	-0.0055	0.0005	0.003	0.0021
Asn_425 (M8)	-0.0001	-0.0008	0.0002	-0.0013	0.0003	0.0003	0.0016	0	-0.0007	-0.0016	0.0001	-0.0005	0.005	-0.0001	0	0.0007	0.0028	0.0028	-0.0025	0.0064	-0.0025	0.0001	0.0003	0.0005	0.0008	0	0	-0.0001	0.0009	0.0004	-0.0012	0.0007	-0.0011	-0.0005	0.001	0	-0.0017	-0.002	0.0003	0.0001	-0.0006	-0.0002
Asp_302 (M0)	1.0051	0.1673	0.1372	0.136	0.875	0.8662	0.8768	0.9957	0.2055	0.2048	0.2044	0.829	0.8337	0.8337	1.0026	0.2891	0.2866	0.2869	0.7956	0.7742	0.7989	1.0032	0.1655	0.1654	0.1602	0.8535	0.8518	0.8523	1.0043	0.2421	0.2399	0.2425	0.8182	0.8236	0.8217	1.0042	0.2315	0.2357	0.2344	0.7746	0.8136	0.798
Asp_303 (M1)	-0.0075	0.0909	0.0873	0.0901	0.028	0.031	0.0276	0.0023	0.0873	0.0838	0.09	0.0527	0.0472	0.0511	-0.0041	0.0841	0.0848	0.085	0.0526	0.0595	0.0502	-0.0058	0.0899	0.0919	0.0911	0.0368	0.0362	0.0365	-0.0055	0.13	0.1295	0.1297	0.0596	0.0575	0.059	-0.006	0.1278	0.1274	0.1262	0.071	0.0572	0.0632
Asp_304 (M2)	0.0014	0.7419	0.7776	0.7745	0.0939	0.0999	0.093	0.0013	0.7089	0.7102	0.7062	0.1175	0.1161	0.1117	0.0008	0.6292	0.6285	0.6288	0.1515	0.1666	0.1507	0.0016	0.7434	0.7441	0.7509	0.1081	0.111	0.1087	0.0005	0.6292	0.6315	0.6288	0.1218	0.1182	0.119	0.0012	0.6426	0.6386	0.6398	0.1532	0.129	0.1387
Asp_305 (M3)	0.0008	-0.0003	-0.0047	-0.0017	0.003	0.003	0.0026	0.0008	-0.002	-0.0007	-0.0019	0.0012	0.0026	0.002	0.0007	-0.003	-0.0011	-0.0013	-0.0002	-0.0006	0.0002	0.0011	0.0002	-0.0019	-0.0028	0	0.001	0.0011	0.0005	-0.0016	-0.0013	-0.0008	-0.0002	0	-0.0004	0.0006	-0.0042	-0.0026	-0.0005	-0.0004	-0.0005	-0.0008
Asp_306 (M4)	0.0004	-0.0015	0.0006	-0.0011	0	-0.0002	-0.0003	0	-0.0011	0.0001	0.0011	-0.0007	-0.0003	0.0009	0	-0.0006	0	-0.0002	-0.0001	0.0003	-0.0003	0	0	-0.0014	-0.001	0.0012	0.0003	0.0008	0.0001	-0.0002	-0.0004	-0.0011	0.0004	0.0003	0.0002	0.0001	0.0006	0	-0.001	0.001	0.0002	0.0004
Asp_307 (M5)	-0.0002	0.0013	0.0018	0.0019	0.0004	0.0003	0.0008	-0.0004	0.0018	0.0017	-0.0006	0.0009	0.0003	0.0004	0	0.0007	0.001	0.0006	0.0005	0.0003	0.0003	-0.0003	0.0001	0.0017	0.0011	0.0004	-0.0001	0.0008	0	0.0002	0.0004	0.0006	0.0003	0.0002	0.0003	0	0.0015	0.0007	0.0008	0.0006	0.0005	0.0005
Asp_308 (M6)	0.0001	0.0009	0.0008	0.0006	-0.0004	-0.0004	-0.0004	0.0004	-0.0005	0.0005	0.0012	-0.0005	0.0006	0.0002	0	0.0005	0.0003	0.0003	0.0001	-0.0003	0	0.0002	0.0008	0.0006	0.0006	-0.0001	-0.0003	-0.0002	0	0.0003	0.0004	0.0003	-0.0001	0.0001	0.0001	0	0.0003	0.0003	0.0005	0	-0.0001	0.0001
Asp_309 (M7)	0	-0.0005	-0.0005	-0.0001	0	0.0001	0	-0.0001	0.0001	-0.0004	-0.0003	0	-0.0002	0	0	0.0002	0	0	-0.0001	0	-0.0001	0	0.0001	-0.0004	-0.0002	0.0001	0.0001	0	0	0.0001	0	0.0001	0.0001	0	0	0	-0.0001	-0.0001	0	0.0001	0.0001	0.0001
Asp_310 (M8)	0	0	0	-0.0001	0	0	0	0	0.0001	0	-0.0001	0	0	0	0	-0.0001	0	0	0	0	0	0	-0.0001	0	0	0	0	0	0	0	-0.0001	0	0	0	0	0	0	0	-0.0001	0	0	0
Asp_390 (M0)	1.0138	0.1143	0.0907	0.0972	0.7855	0.7914	0.7862	1.0117	0.1687	0.1742	0.1701	0.7414	0.762	0.7611	1.0068	0.183	0.1794	0.1782	0.7064	0.6794	0.704	1.0012	0.1024	0.0967	0.103	0.7655	0.7736	0.7642	1.0072	0.1658	0.1658	0.1637	0.7559	0.7602	0.7596	1.0073	0.1646	0.1629	0.1709	0.6728	0.7203	0.7022
Asp_391 (M1)	-0.0133	0.0972	0.0879	0.0847	0.0695	0.0577	0.0699	-0.0095	0.0782	0.0727	0.08	0.0618	0.0682	0.063	-0.0033	0.1534	0.1507	0.1534	0.099	0.1091	0.0983	-0.0038	0.1005	0.1016	0.0967	0.083	0.0793	0.0732	-0.0054	0.1157	0.1173	0.1173	0.0689	0.0714	0.0702	-0.009	0.1267	0.122	0.1179	0.0981	0.0834	0.0917
Asp_392 (M2)	0.0018	0.1297	0.1265	0.1279	0.1191	0.1246	0.1173	-0.0029	0.1227	0.1233	0.1259	0.149	0.1221	0.1278	-0.0042	0.1283	0.1315	0.1296	0.1477	0.1559	0.1503	0.0027	0.133	0.1326	0.1281	0.1216	0.1166	0.1357	-0.0022	0.1541	0.1528	0.1545	0.12	0.1171	0.1186	0.0026	0.1593	0.1644	0.1599	0.1716	0.1547	0.1559
Asp_393 (M3)	-0.001	0.6618	0.6928	0.6923	0.0269	0.0294	0.0273	0.0031	0.6308	0.6341	0.631	0.0497	0.0498	0.0525	0.001	0.5403	0.5413	0.5479	0.0466	0.0562	0.0478	0	0.6715	0.6752	0.6789	0.0317	0.0311	0.0264	0.0001	0.5679	0.569	0.5687	0.0561	0.0514	0.0522	-0.0003	0.554	0.5573	0.5558	0.0578	0.0424	0.0516
Asp_394 (M4)	-0.0007	-0.0013	0.0058	0.0001	0.0004	-0.002	0.0005	-0.0015	0.0017	0.0004	-0.0043	-0.0014	-0.0003	-0.0021	0.0004	-0.0032	-0.0003	-0.0078	0.0003	0	-0.0011	0.0004	-0.0058	-0.0062	-0.0043	-0.0012	0.0014	0.0021	0.0003	-0.0033	-0.0036	-0.0028	-0.0009	-0.0002	-0.0009	-0.0005	-0.0037	-0.0045	-0.0027	0.0002	-0.0004	-0.0014
Asp_395 (M5)	-0.001	0.0011	-0.002	0.0001	-0.0005	0	0	-0.0012	-0.0025	-0.0024	-0.0027	0.0008	0.0007	-0.0002	-0.0008	-0.0014	-0.0024	-0.0008	0.0009	-0.0002	0.0011	-0.0004	-0.0016	0.0004	-0.0017	0.0004	-0.0003	-0.0009	-0.0001	-0.0003	-0.0014	-0.002	0	0.0001	0.0002	0	-0.0008	-0.002	-0.0018	-0.0001	0.0003	0.0008
Asp_396 (M6)	0.0002	-0.0027	0.0002	-0.0012	-0.001	-0.0012	-0.0015	0.0003	0.0018	-0.0015	0.0006	-0.0014	-0.0029	-0.0025	0	-0.0007	0.0003	-0.0003	-0.0006	-0.0002	-0.0003	-0.0001	0.0003	0.0005	0.0009	-0.0009	-0.002	-0.0006	-0.0001	0	-0.0003	0.0005	0.0001	0	0.0002	-0.0001	0.0004	0.0002	0.0005	-0.0001	-0.0003	-0.0003
Asp_397 (M7)	0.0001	0.0001	-0.0018	-0.0009	0	0	0	0.0001	-0.0008	-0.0008	-0.0002	0	0.0002	0.0002	0.0001	0.0006	-0.0001	0.0004	-0.0003	-0.0002	-0.0003	0.0001	0.0005	-0.0003	-0.0012	-0.0002	0.0002	-0.0001	0	0.0001	0.0004	0.0002	0	-0.0001	-0.0001	0	-0.0001	0.0001	0.0001	-0.0003	-0.0004	-0.0006
Asp_398 (M8)	0	-0.0004	-0.0003	-0.0004	0.0001	0.0001	0.0001	0	-0.0007	-0.0002	-0.0006	0.0001	0.0003	0.0002	0	-0.0002	-0.0005	-0.0006	0.0001	0	0	0	-0.0009	-0.0007	-0.0005	0.0001	0.0002	0.0001	0	0.0001	0	-0.0001	-0.0001	-0.0001	-0.0001	0	-0.0006	-0.0005	-0.0006	0	0.0001	0.0001
Asp_418 (M0)	1.0051	0.1139	0.0935	0.0998	0.7721	0.774	0.7762	1.0025	0.1723	0.1741	0.1717	0.7301	0.7517	0.7447	1.0058	0.1653	0.1615	0.1617	0.7052	0.6777	0.7028	1.0043	0.0957	0.0949	0.1014	0.7574	0.7597	0.7456	1.0082	0.1534	0.1527	0.1521	0.7509	0.7563	0.7543	1.009	0.1627	0.1575	0.1628	0.6624	0.7072	0.6961
Asp_419 (M1)	-0.0047	0.0467	0.0331	0.0332	0.0117	0.0074	0.0082	-0.0029	0.0324	0.0333	0.0332	0.0117	0.0148	0.0141	-0.0047	0.0808	0.0834	0.0814	0.0111	0.013	0.0147	-0.0019	0.0408	0.0421	0.0368	0.0124	0.0141	0.0142	-0.0068	0.0665	0.0659	0.0668	0.0201	0.0194	0.0191	-0.0085	0.0617	0.06	0.0606	0.0222	0.0203	0.02
Asp_420 (M2)	-0.0018	0.1351	0.1212	0.1202	0.1203	0.1244	0.1208	0.0002	0.1096	0.1103	0.1075	0.1106	0.1126	0.1126	-0.0012	0.1806	0.1799	0.1818	0.1779	0.1892	0.1761	-0.0027	0.1403	0.1392	0.1373	0.1391	0.1416	0.1391	-0.0017	0.1399	0.1393	0.1398	0.113	0.1126	0.1126	-0.0014	0.1564	0.1586	0.1539	0.1554	0.1414	0.1449
Asp_421 (M3)	0.002	0.1133	0.116	0.1155	0.0864	0.0813	0.0846	0.0001	0.1163	0.1129	0.1155	0.1285	0.1	0.1076	-0.0002	0.0723	0.072	0.0723	0.0859	0.0963	0.0869	0.0002	0.1142	0.1161	0.115	0.081	0.0697	0.0887	0.0001	0.1546	0.1531	0.1537	0.094	0.0909	0.0937	0.0012	0.1468	0.1483	0.1467	0.1368	0.1164	0.1213
Asp_422 (M4)	-0.0003	0.592	0.6388	0.634	0.0113	0.0122	0.0106	-0.0003	0.5725	0.5665	0.5758	0.0197	0.0214	0.0208	0.0006	0.5052	0.5072	0.5061	0.0202	0.0242	0.02	0.0002	0.6118	0.6107	0.6161	0.0104	0.0148	0.0123	0.0002	0.4906	0.4935	0.4922	0.0222	0.0206	0.0205	-0.0003	0.4754	0.4788	0.4808	0.0231	0.0152	0.0186
Asp_423 (M5)	-0.0002	-0.0011	-0.0003	-0.0026	-0.0014	0.0021	-0.0005	-0.0007	-0.0029	0.0007	-0.004	-0.0009	0	0.0014	-0.0002	-0.0032	-0.0032	-0.0024	0	-0.0002	-0.0008	-0.0002	-0.0017	-0.0038	-0.0051	-0.0002	-0.0001	0.0003	-0.0001	-0.0033	-0.0036	-0.0036	-0.0004	-0.0001	-0.0006	0	-0.0018	-0.0026	-0.0044	0.0003	-0.0006	-0.0009
Asp_424 (M6)	-0.0002	0	-0.003	-0.0003	-0.0003	-0.0007	0.0002	0	-0.0024	0.0013	-0.001	0.0001	0	-0.0007	-0.0002	-0.0008	-0.0005	-0.0006	-0.0002	0	0.0004	-0.0002	-0.0012	0.001	-0.0016	-0.0001	0.0001	-0.0002	0	-0.0018	-0.0009	-0.0006	0.0002	0.0003	0.0002	0	-0.0012	-0.0003	-0.001	-0.0001	-0.0001	0.0001
Asp_425 (M7)	0.0002	0.0007	0.0016	0.0014	0.0001	-0.0009	0.0002	0.0014	0.0033	0.0016	0.0032	0.0008	-0.0004	-0.0004	0	0.0004	0.0002	0.0001	0	0	0.0001	0.0003	0.0008	0.0007	0.0009	0.0002	0.0003	0.0002	0.0001	0.0004	0.0004	0	0.0001	0	0.0001	0	0.0002	0.0002	0.0008	0.0001	0.0003	0.0001
Asp_426 (M8)	0	0	-0.0001	-0.0006	-0.0002	0.0001	-0.0003	-0.0002	-0.0002	-0.0001	-0.0015	-0.0005	-0.0002	-0.0002	0	-0.0001	0.0001	0.0001	-0.0002	0	-0.0002	0	-0.0001	-0.0002	0	-0.0002	-0.0003	-0.0003	0	0.0003	0.0001	0.0002	0	0	0	0	0.0002	0.0001	0.0005	-0.0001	-0.0001	-0.0003
Cit_459 (M0)	0.9946	0.1328	0.0858	0.0812	0.2645	0.2636	0.247	0.9889	0.1408	0.1357	0.1325	0.2317	0.2673	0.2492	0.9951	0.1695	0.1631	0.1592	0.1351	0.129	0.1311	0.9964	0.0832	0.0828	0.0823	0.1676	0.1749	0.171	0.9982	0.1879	0.1769	0.1781	0.1487	0.1599	0.158	0.9977	0.1316	0.1345	0.1383	0.2028	0.2346	0.2327
Cit_460 (M1)	-0.0051	0.0435	0.0369	0.0359	0.017	0.0131	0.014	-0.0002	0.0349	0.0346	0.0322	0.0197	0.0268	0.0233	0.0007	0.0788	0.0823	0.0852	0.0132	0.0139	0.0149	-0.0076	0.04	0.0396	0.036	0.0193	0.0221	0.017	-0.0018	0.1173	0.1163	0.1152	0.0173	0.0189	0.0208	-0.0094	0.0727	0.0661	0.0598	0.0227	0.023	0.0219
Cit_461 (M2)	0.0109	0.1243	0.1167	0.1099	0.5406	0.5503	0.5588	0.0098	0.1017	0.1109	0.1142	0.5392	0.512	0.5307	0.0065	0.1648	0.1664	0.1662	0.5844	0.5639	0.5845	0.0124	0.133	0.1336	0.1337	0.6082	0.5952	0.6048	0.0026	0.1871	0.1894	0.1862	0.4423	0.4422	0.441	0.0112	0.148	0.1472	0.1469	0.4889	0.5087	0.4852
Cit_462 (M3)	0.0029	0.1008	0.112	0.1181	0.0239	0.0239	0.0242	0.0037	0.1148	0.1116	0.1222	0.0303	0.0264	0.0251	-0.0015	0.0915	0.0921	0.0904	0.0237	0.0322	0.0281	-0.0005	0.1139	0.1143	0.1157	0.0256	0.0265	0.0309	0.0011	0.0953	0.0976	0.1031	0.0545	0.0548	0.0501	0.0016	0.1279	0.1315	0.1322	0.044	0.0351	0.0421
Cit_463 (M4)	-0.0018	0.4469	0.4851	0.4903	0.1102	0.1059	0.1034	0	0.4225	0.4454	0.4463	0.1066	0.0975	0.0992	0	0.4464	0.4491	0.4488	0.1554	0.1581	0.1529	0.0003	0.5231	0.5255	0.519	0.1227	0.1273	0.1195	0.0005	0.3427	0.3491	0.3509	0.1752	0.1704	0.1763	-0.0009	0.3871	0.3862	0.3906	0.1363	0.1229	0.1292
Cit_464 (M5)	-0.0021	0.1226	0.1283	0.1313	0.0398	0.0396	0.0445	-0.0029	0.1404	0.1177	0.1081	0.0678	0.0608	0.0649	-0.0009	0.0428	0.0413	0.0412	0.0726	0.0817	0.0704	-0.0011	0.078	0.0765	0.0837	0.0487	0.0447	0.0474	-0.0002	0.0488	0.0535	0.0479	0.1184	0.1113	0.1152	0.0001	0.1063	0.1094	0.1084	0.0819	0.0627	0.0735
Cit_465 (M6)	0.0005	0.03	0.0367	0.0381	0.008	0.0088	0.0118	0.0004	0.0428	0.0515	0.0433	0.0157	0.0195	0.0196	0	0.0053	0.0072	0.0096	0.0183	0.0213	0.0185	-0.0001	0.0266	0.0265	0.0332	0.0085	0.0111	0.0105	-0.0004	0.0198	0.0195	0.0184	0.0426	0.0402	0.0404	-0.0003	0.0286	0.0243	0.0241	0.0224	0.0146	0.0157
Cit_466 (M7)	0.0002	-0.0001	0.0003	-0.0015	-0.0013	-0.0033	-0.0034	0.0002	0.0018	-0.0067	0.0043	-0.0107	-0.0078	-0.0117	0.0001	0.0011	0.0001	-0.0002	-0.0004	-0.0003	0.0003	0.0001	0.0014	0.003	-0.0022	-0.0004	-0.0013	-0.0006	0.0001	0.0001	-0.0018	0.0003	0	0.0008	-0.0031	0.0001	0.0002	0.0014	0.0016	0.001	-0.0003	0.001
Cit_467 (M8)	0	0.0008	-0.0007	-0.0012	-0.0034	-0.0025	-0.0012	0	-0.0007	0.0015	-0.002	-0.0012	-0.0037	-0.0013	0	0.0009	-0.0008	0.0002	-0.0017	0.0014	0.0005	0	0.001	0.0005	0.0008	0.0003	0	-0.0002	0	0.0008	0.0011	0.0012	-0.0004	0.0012	0.0006	0	-0.0006	0.0002	-0.0013	0	-0.0008	-0.0006
Cit_468 (M9)	0	-0.0021	-0.0011	-0.0025	0.0004	0.0004	-0.0001	0	-0.0017	-0.0028	-0.0018	0.0007	0.0009	0.0008	0	-0.001	-0.0011	-0.0006	-0.0008	-0.001	-0.0014	0	-0.0003	-0.0029	-0.0025	-0.0007	-0.0004	-0.0006	0	-0.0009	-0.0017	-0.0018	0.0006	-0.0004	-0.0005	0	-0.0023	-0.0012	-0.0009	-0.0008	-0.0006	-0.0013
Cit_469 (M10)	0	-0.0001	-0.0002	0.0003	0.0003	0.0002	0.0001	0	-0.0001	0.0001	0.0001	0.0001	0.0003	0.0001	0	-0.0001	0.0002	-0.0001	0.0002	-0.0002	0	0	-0.0004	0.0002	0.0001	0	0	0	0	0.0009	0	0.0006	0.0007	0.0007	0.0012	0	0.0003	0.0004	0.0003	0.001	0.0001	0.0007
Cit_470 (M11)	0	0.0007	0.0001	0.0002	0	0	0.001	0	0.0039	0.0007	0.0008	0	-0.0001	0.0002	0	0.0001	0.0001	0.0001	0.0001	0.0001	0.0001	0.0001	0.0007	0.0006	0.0002	0.0001	0.0001	0.0001	0	0.0003	0.0002	0	0.0002	0.0004	0.0001	0	0.0002	0	0	0	0.0001	0
Cit_591 (M0)	1.0047	0.1371	0.09	0.0761	0.2694	0.2566	0.2553	1.0053	0.1407	0.1376	0.1492	0.2336	0.275	0.2424	1.0064	0.1744	0.1648	0.1655	0.1387	0.1282	0.1336	1.0058	0.0801	0.0821	0.0817	0.1657	0.1703	0.1733	1.0058	0.1897	0.1838	0.1855	0.1475	0.1562	0.155	1.0127	0.1361	0.1334	0.1315	0.2004	0.2356	0.2295
Cit_592 (M1)	0.003	0.0407	0.0354	0.0339	0.0072	0.0224	0.0138	0.0087	0.0362	0.0301	0.0264	0.019	0.0156	0.027	-0.0029	0.0812	0.0788	0.0836	0.0124	0.0136	0.0116	0.0038	0.0441	0.0401	0.0412	0.0198	0.0199	0.0134	-0.0051	0.1138	0.1182	0.1164	0.0196	0.02	0.0215	-0.0104	0.0652	0.0635	0.0627	0.0214	0.0159	0.0218
Cit_593 (M2)	-0.0017	0.1204	0.1117	0.1228	0.5503	0.5581	0.5601	-0.0123	0.1047	0.1023	0.1052	0.5372	0.5167	0.5369	-0.0008	0.1592	0.17	0.165	0.5887	0.5745	0.5856	-0.011	0.1314	0.1308	0.1275	0.6159	0.6035	0.611	0.0016	0.1878	0.1827	0.1865	0.4412	0.4511	0.45	-0.0003	0.145	0.1468	0.1514	0.4988	0.508	0.4986
Cit_594 (M3)	-0.0022	0.1048	0.1175	0.1113	0.0243	0.0161	0.0186	0.002	0.1146	0.1075	0.1118	0.0246	0.0339	0.0158	0.0003	0.0896	0.0919	0.0891	0.0222	0.0274	0.0244	0.0033	0.1065	0.1118	0.1161	0.0175	0.0181	0.0295	-0.002	0.0929	0.0991	0.0952	0.0556	0.0506	0.0527	-0.0006	0.1292	0.1413	0.1269	0.041	0.0454	0.0383
Cit_595 (M4)	-0.0017	0.4507	0.489	0.5028	0.0988	0.0897	0.1053	-0.0011	0.4292	0.4673	0.456	0.0981	0.0802	0.0998	-0.0007	0.4466	0.4487	0.4623	0.1527	0.1585	0.159	-0.0022	0.535	0.5381	0.5279	0.1226	0.1312	0.1202	0.001	0.3534	0.3495	0.3505	0.1722	0.1718	0.1722	-0.0008	0.3967	0.3824	0.3955	0.1374	0.1123	0.1278
Cit_596 (M5)	-0.0032	0.1207	0.131	0.1271	0.0424	0.0557	0.0454	-0.0047	0.1351	0.1203	0.1177	0.0783	0.0697	0.0697	-0.0031	0.0503	0.0482	0.032	0.0742	0.0724	0.068	0.0006	0.0753	0.0706	0.0833	0.0453	0.0448	0.0433	-0.0013	0.0498	0.0506	0.0493	0.1244	0.1141	0.1105	0	0.1063	0.11	0.1153	0.0818	0.0704	0.069
Cit_597 (M6)	0.0009	0.0309	0.0223	0.0264	0.0056	0.0032	0.0016	0.0013	0.0346	0.035	0.034	0.0105	0.0076	0.0107	0.0005	0.0012	-0.0001	0.0022	0.0141	0.0263	0.0196	-0.0008	0.0266	0.025	0.0231	0.012	0.0128	0.0101	-0.0004	0.0121	0.0186	0.019	0.0394	0.0331	0.0381	-0.0008	0.0226	0.026	0.0171	0.0184	0.0125	0.0162
Cit_598 (M7)	0.0004	0.0005	0.0098	0.005	0.0067	0.003	0.0051	0.0013	0.014	0.0063	0.0031	0.0008	0.0047	0.0004	0.0004	-0.0018	-0.0024	0.0006	0.0012	0.0001	0.0008	0.0006	0.0027	0.0063	0.0041	0.004	0.0045	0.0019	0.0005	0.0016	-0.0012	-0.0019	0	0.0042	0.0015	0.0002	0.0028	-0.0011	0.0052	0.0016	0.0003	-0.0001
Cit_599 (M8)	-0.0001	-0.0049	-0.0013	-0.0016	-0.0036	-0.0052	-0.0053	-0.0005	-0.0041	-0.0036	0.0018	0.0003	-0.0014	-0.001	-0.0001	0.0004	0.0024	0.0021	-0.0026	0.0005	-0.0019	-0.0001	0.0003	-0.0015	-0.0022	-0.0022	-0.0041	-0.0011	-0.0001	0	0	0.0009	0.0002	0.0005	0.0004	0.0001	-0.0014	-0.0006	-0.0035	0.0003	0.0007	0.0012
Cit_600 (M9)	0	-0.0011	-0.0081	-0.0048	-0.0018	-0.0004	-0.0006	-0.0001	-0.0066	-0.0032	-0.0062	-0.0031	-0.0029	-0.0023	0	-0.0012	-0.0027	-0.0026	-0.0024	-0.001	-0.0008	-0.0001	-0.0014	-0.0038	-0.0034	-0.0006	-0.0018	-0.0022	0	-0.0006	-0.0012	-0.0012	0.0008	-0.0005	-0.0014	0	-0.003	-0.0016	-0.0027	-0.0006	-0.001	-0.0026
Cit_601 (M10)	0	0	0.0014	0.0004	0.0007	0.0007	0.0008	0.0001	0.001	0	0.0003	0.0005	0.0006	0.0005	0	-0.0001	0.0001	-0.0001	0.0007	-0.0007	-0.0001	0	-0.001	0.0002	0.0003	-0.0001	0.0008	0.0005	0	-0.0006	-0.0003	-0.0005	-0.0008	-0.0015	-0.0007	0	0	-0.0005	0.0003	-0.0007	-0.0004	0
Cit_602 (M11)	0	0.0003	0.0017	0.0006	0.0001	0	0	0	0.0007	0.0005	0.0008	0.0003	0.0003	0.0002	0	0.0002	0.0003	0.0003	0.0002	0.0003	0.0002	0	0.0004	0.0005	0.0004	0.0001	0.0002	0.0002	0	0.0002	0.0002	0.0003	-0.0002	0.0003	0.0003	0	0.0004	0.0003	0.0004	0.0002	0.0002	0.0003
Cys_378 (M0)	0.932	0.9235	0.9296	0.9308	0.9308	0.9324	0.9298	0.9268	0.9275	0.9293	0.9316	0.9291	0.9259	0.928	0.928	0.9294	0.9303	0.9266	0.9306	0.9261	0.9297	0.9273	0.9303	0.9291	0.9314	0.9305	0.9244	0.9265	0.9261	0.9237	0.929	0.9256	0.9278	0.9313	0.93	0.9282	0.9282	0.9295	0.9281	0.9291	0.9287	0.9273
Cys_379 (M1)	0.0391	0.0463	0.0396	0.0383	0.0402	0.0412	0.0405	0.0426	0.0412	0.0407	0.0378	0.0409	0.0411	0.041	0.0431	0.0401	0.0401	0.0434	0.0419	0.0446	0.0396	0.0443	0.039	0.0405	0.0405	0.0417	0.0455	0.042	0.0423	0.0479	0.0404	0.0443	0.0412	0.0376	0.0399	0.044	0.0399	0.0402	0.044	0.0412	0.0414	0.0439
Cys_380 (M2)	0.0249	0.0266	0.0279	0.0279	0.0264	0.0249	0.028	0.0274	0.029	0.0249	0.0268	0.0273	0.0281	0.0276	0.0261	0.0262	0.0266	0.0274	0.0254	0.0282	0.0275	0.0254	0.0273	0.0285	0.025	0.0256	0.0282	0.0279	0.028	0.0238	0.0267	0.0269	0.0273	0.0272	0.026	0.0239	0.0283	0.0289	0.0246	0.0277	0.0283	0.0255
Cys_381 (M3)	0.0016	0.001	0	0.0016	0.0008	0	0.0003	0.0009	-0.0003	0.0019	0.0017	0.001	0.0016	0.0009	0.0005	0.0027	0	0.0002	-0.0001	-0.0006	0.0011	0.0013	0.0015	-0.0001	0.0011	0.0008	0	0.0011	-0.0001	0.0004	0.0008	-0.0004	0.0004	0.0004	0.0015	0.0022	0.0012	-0.0007	0.0006	0.0002	-0.0003	0.0007
Cys_382 (M4)	0.0004	0.0003	0.0001	-0.0009	-0.0005	0.0006	-0.0002	0.0004	0.0002	0.0002	0	0.0001	0.0002	0.0002	-0.0003	-0.0006	0.0007	0.0005	0.0001	0	-0.0001	0.0009	0	-0.0004	-0.0001	0.0001	0.0001	-0.0004	0.0006	0.0006	0.0002	0	0.0004	0.0005	0.0005	0.0003	-0.0004	-0.0001	0.0001	0.0006	0.0007	0.0009
Cys_383 (M5)	0.0019	0.0018	0.0028	0.0025	0.0019	0.0014	0.0014	0.002	0.0025	0.0027	0.0017	0.0018	0.0024	0.0021	0.0018	0.0017	0.0018	0.0019	0.0016	0.0017	0.0016	0.0006	0.0019	0.0026	0.0015	0.0015	0.0018	0.0025	0.0033	0.0033	0.0035	0.0035	0.0028	0.0027	0.0026	0.0015	0.0028	0.0014	0.0021	0.0006	0.0016	0.0016
Cys_384 (M6)	0	0.0002	0	-0.0001	0.0003	-0.0005	0	0.0001	0	0.0006	0.0002	-0.0001	0.0004	-0.0002	0.0009	0.0004	0.0006	0.0004	0.0007	0.0003	0.0006	0.0002	0.0002	0	0.0007	0	-0.0001	0.0002	0	-0.0003	-0.0003	0	0.0005	0.0003	-0.0002	-0.0001	0.0005	0.001	0.0009	0.0004	-0.0005	0.0005
Cys_385 (M7)	0.0003	0.0005	0	0	0.0002	-0.0002	0.0002	-0.0001	-0.0001	0	0.0004	-0.0001	0.0006	0.0006	0	0.0002	0.0001	-0.0002	-0.0001	-0.0001	0.0002	0.0002	-0.0001	-0.0001	0	-0.0002	0.0003	0.0005	-0.0002	0.001	-0.0004	0.0003	-0.0004	0.0003	-0.0004	0	-0.0006	-0.0002	-0.0002	0.0003	0.0001	-0.0003
Cys_386 (M8)	-0.0001	-0.0002	-0.0001	0	-0.0001	0.0001	-0.0001	0	-0.0001	-0.0002	-0.0001	0	-0.0002	-0.0002	-0.0002	-0.0002	-0.0002	-0.0001	-0.0001	-0.0001	-0.0002	-0.0001	-0.0001	0	-0.0001	0	-0.0001	-0.0002	0	-0.0003	0	-0.0002	0	-0.0002	0.0001	0	0	-0.0001	-0.0001	-0.0001	0	-0.0001
Cys_406 (M0)	0.938	0.9411	0.9396	0.9334	0.9372	0.938	0.9395	0.9405	0.9379	0.9377	0.9354	0.9406	0.9358	0.9385	0.9387	0.9412	0.9411	0.9372	0.9408	0.9404	0.9411	0.936	0.9365	0.9387	0.9383	0.9378	0.9397	0.9359	0.9378	0.9416	0.9355	0.9369	0.938	0.937	0.9396	0.9432	0.939	0.9434	0.942	0.9354	0.9399	0.936
Cys_407 (M1)	0.0324	0.0289	0.03	0.0367	0.0346	0.0337	0.0317	0.0307	0.0323	0.0314	0.0334	0.0309	0.0346	0.0334	0.0335	0.0302	0.031	0.0338	0.03	0.0297	0.0319	0.0331	0.0336	0.0321	0.0326	0.0317	0.0314	0.0334	0.0305	0.0275	0.0354	0.0311	0.0311	0.0329	0.0308	0.026	0.0311	0.028	0.0284	0.0367	0.0327	0.0338
Cys_408 (M2)	0.0291	0.0288	0.031	0.0298	0.0293	0.0283	0.029	0.0281	0.0285	0.0303	0.0299	0.0278	0.0275	0.027	0.0271	0.0275	0.0286	0.0298	0.0296	0.0298	0.0267	0.0294	0.0301	0.028	0.0287	0.0295	0.0268	0.0308	0.031	0.0312	0.0284	0.0321	0.0308	0.0288	0.03	0.0316	0.0303	0.0298	0.0302	0.0287	0.0277	0.03
Cys_409 (M3)	0.0007	0.0015	-0.0013	-0.0001	-0.001	0.0003	0	0.0007	0.0009	0.0001	0.0013	0.0002	0.0018	0.0009	0.0007	0.001	0.0006	-0.0015	-0.0006	0.0001	0.0002	0.0011	-0.0003	0.0009	0.0001	0.0016	0.0025	-0.0002	0.0004	0.0003	0.0008	0	0.0001	0.0009	0.0001	-0.0004	0.0003	-0.001	-0.0001	-0.0012	-0.0008	0.0011
Cys_410 (M4)	-0.0002	0	0.0005	0.0001	-0.0004	-0.0005	0	-0.0004	0.0002	0	-0.0004	0.0002	0.0007	-0.0002	0.0004	-0.0001	-0.0007	0.0005	0.0006	-0.0003	0.0005	-0.0001	-0.0004	0.0001	0.0002	-0.0004	0.0001	0.0001	-0.0009	-0.0006	-0.0001	-0.0005	-0.0001	0.0002	-0.0006	-0.0009	-0.0008	0.0003	-0.0002	0.0003	0.0004	-0.0004
Cys_411 (M5)	-0.0001	-0.0003	0.0002	0	0.0002	0.0004	-0.0001	-0.0002	-0.0003	-0.0001	-0.0001	0.0002	-0.0003	0.0003	-0.0002	0.0001	-0.0002	0.0003	-0.0001	0.0003	-0.0002	-0.0002	0.0001	-0.0001	-0.0001	-0.0003	-0.0004	-0.0001	0.0005	-0.0002	-0.0001	0.0002	0.0002	-0.0001	0	0.0001	0.0002	-0.0002	-0.0001	0.0003	0.0001	-0.0003
Cys_412 (M6)	-0.0005	-0.0003	-0.0004	-0.0003	-0.0001	-0.0003	-0.0003	0	-0.0002	0	-0.0001	-0.0001	-0.0004	-0.0001	-0.0003	-0.0003	-0.0003	-0.0002	-0.0005	-0.0002	-0.0004	-0.0002	0	-0.0004	-0.0002	-0.0001	-0.0003	-0.0002	-0.0005	-0.0001	-0.0004	-0.0003	-0.0005	-0.0003	-0.0003	-0.0002	-0.0004	-0.0005	-0.0004	-0.0004	-0.0003	-0.0002
Cys_413 (M7)	0.0003	0	0.0001	0.0001	0.0001	0.0002	0.0001	0.0002	0.0001	0.0001	0.0002	0.0002	0.0002	0.0001	0	0	0.0001	-0.0001	0.0002	0.0001	0.0002	0.0004	0	0	0.0001	0.0001	0.0001	0.0001	0.0003	0.0001	0.0002	0.0001	0.0003	0.0006	0.0003	0.0001	0	0.0001	0.0001	0.0002	0.0003	0
Cys_414 (M8)	0.0006	0.0002	0.0004	0.0004	0.0001	0.0001	0.0002	0.0006	0.0008	0.0006	0.0007	0	0.0002	0.0002	0.0002	0.0005	0	0.0003	0.0001	0.0002	0.0002	0.0008	0.0006	0.0009	0.0005	0.0002	0.0002	0.0003	0.0012	0.0002	0.0004	0.0006	0.0002	0.0001	0.0002	0.0006	0.0003	0	0.0003	0.0001	0.0002	0.0001
Fum_287 (M0)	0.9898	0.111	0.0881	0.0842	0.8172	0.8177	0.8131	0.996	0.1596	0.1521	0.1616	0.7819	0.7878	0.7828	0.9889	0.1752	0.1699	0.164	0.7106	0.6846	0.7089	0.9893	0.1116	0.1112	0.1097	0.7888	0.7804	0.7829	0.9929	0.1876	0.1811	0.1857	0.7165	0.7216	0.7205	0.9913	0.157	0.1563	0.1596	0.7071	0.74	0.7385
Fum_288 (M1)	0.0064	0.0386	0.0318	0.0328	0.0137	0.0141	0.0193	0.0062	0.0325	0.0291	0.0282	0.0173	0.0181	0.018	0.0065	0.0796	0.0796	0.0777	0.0192	0.02	0.0179	0.0103	0.041	0.041	0.0362	0.0168	0.0208	0.0208	0.0082	0.0776	0.0765	0.0741	0.0268	0.0285	0.0289	0.0095	0.0577	0.0579	0.0589	0.0294	0.0299	0.0221
Fum_289 (M2)	0.0021	0.1245	0.1173	0.1234	0.1126	0.1145	0.1163	-0.0024	0.1066	0.1094	0.1061	0.1036	0.1009	0.1076	0.004	0.1684	0.1802	0.1785	0.1682	0.1794	0.1712	0	0.1347	0.1393	0.1324	0.1312	0.1351	0.1327	-0.0006	0.151	0.1451	0.1466	0.1289	0.13	0.1323	-0.0017	0.1521	0.1518	0.1526	0.1439	0.1365	0.1378
Fum_290 (M3)	0.0014	0.1208	0.1239	0.1209	0.0476	0.0434	0.042	-0.0002	0.1208	0.1207	0.12	0.0812	0.0835	0.0779	0.001	0.0755	0.0694	0.0754	0.0797	0.0902	0.0836	0.0013	0.1082	0.1118	0.1121	0.0518	0.0554	0.0534	-0.0008	0.1307	0.135	0.1329	0.0976	0.094	0.0929	0.0004	0.1496	0.1541	0.1493	0.0975	0.0787	0.0822
Fum_291 (M4)	0.0009	0.6013	0.6338	0.6367	0.0093	0.0119	0.0107	0.0009	0.5752	0.5855	0.5828	0.018	0.0141	0.0158	-0.0003	0.502	0.5011	0.5032	0.0229	0.0265	0.0202	-0.0007	0.6015	0.5984	0.6087	0.0142	0.0107	0.0121	0.0008	0.4522	0.4628	0.4583	0.0301	0.0263	0.0274	0.001	0.4817	0.4792	0.4813	0.0227	0.0155	0.0208
Fum_292 (M5)	-0.0006	0.0037	0.0057	0.0026	0.0002	0.0001	-0.0002	-0.0004	0.0056	0.0042	0.0034	-0.0013	-0.0036	-0.0033	-0.0004	0.0006	0.0019	0.0047	0.0006	-0.0002	-0.0009	-0.0003	0.0061	-0.0006	0.0022	-0.0013	-0.0019	-0.0011	-0.0004	0.001	0.0002	0.0018	0.0008	-0.0006	-0.0014	-0.0005	0.0016	0.0015	0.0018	0.0002	0.0001	-0.0007
Fum_293 (M6)	0	0.0012	0.0012	0.0017	-0.0005	-0.0019	-0.0012	0	0.001	0.0012	-0.0005	-0.0006	-0.0013	0.0008	0	-0.0001	0.0005	-0.0017	-0.0008	0	-0.0009	0.0001	-0.0019	0.001	0.0007	-0.0017	-0.0004	-0.0009	0	0.0004	0.0008	0.0012	0	0	-0.0004	0	0.0012	-0.0003	-0.0021	-0.0007	-0.0005	-0.0007
Fum_294 (M7)	0	-0.0001	-0.0009	-0.0012	-0.0002	0	0	0	-0.0003	-0.0011	-0.0009	-0.0002	0.0001	-0.0003	0	-0.0003	-0.0019	-0.0011	-0.0004	-0.0006	-0.0002	0	-0.0006	-0.0012	-0.001	0.0001	-0.0001	-0.0001	0	0.0001	-0.0004	0.0004	-0.0007	-0.0001	-0.0004	0	0.0003	0.0002	-0.0007	-0.0004	-0.0003	-0.0003
Fum_295 (M8)	0	-0.001	-0.001	-0.0012	0	0.0001	0.0001	0	-0.0011	-0.0014	-0.0009	0	0.0001	-0.0001	0	-0.0008	-0.0009	-0.0009	0.0001	0	0.0001	0	-0.0008	-0.0009	-0.0014	0.0001	0	0.0001	0	-0.0006	-0.0011	-0.0009	0	-0.0001	0	0	-0.0013	-0.0009	-0.0009	0	0	0
Fum_296 (M9)	0	0	0.0001	0.0001	0	0	0	0	0.0001	0.0002	0.0001	0	0	0	0	0.0001	0.0002	0.0001	0	0	0	0	0.0001	0.0001	0.0001	0	0	0	0	0	0.0001	0	0	0	0	0	0.0001	0	0.0001	0	0	0
Fum_297 (M10)	0	0.0001	0.0001	0.0001	0	0	0	0	0.0001	0.0001	0.0001	0	0.0004	0.0007	0.0004	0.0001	0.0001	0.0001	0	0	0.0003	0	0.0002	0.0001	0.0001	0	0	0	0	0	0.0001	0.0001	0	0.0003	0.0001	0	0.0001	0.0001	0.0001	0.0002	0	0.0002
Gln_431 (M0)	1.0068	0.0036	0.0033	0.0033	1.0059	1.0056	1.0057	1.0067	0.0037	0.0035	0.0037	1.0062	1.0061	1.0067	1.008	0.0131	0.0133	0.0131	0.9863	0.9781	0.9862	1.0065	0.0048	0.0046	0.0044	1.0053	1.0052	1.0053	1.0076	0.0076	0.007	0.0074	0.9979	0.9996	0.9993	1.0071	0.0049	0.0052	0.0058	1.0017	1.0036	1.0035
Gln_432 (M1)	-0.0045	0.0003	0.0003	0.0003	-0.0056	-0.0044	-0.0051	-0.0051	0.0003	0.0004	0.0003	-0.0055	-0.0041	-0.005	-0.007	0.0051	0.0049	0.0051	-0.0057	-0.0032	-0.0054	-0.0043	0.0005	0.0005	0.0004	-0.0056	-0.006	-0.0057	-0.0061	0.0017	0.0016	0.0015	-0.004	-0.0053	-0.0048	-0.0047	0.0009	0.0009	0.0009	-0.0058	-0.0053	-0.0052
Gln_433 (M2)	-0.0029	0.0004	0.0005	0.0005	-0.0011	-0.0018	-0.001	-0.0017	0.0004	0.0005	0.0003	-0.0009	-0.0026	-0.0012	-0.0015	0.0042	0.0044	0.0044	0.0128	0.0159	0.0123	-0.0025	0.0006	0.0007	0.0006	-0.0005	-0.0001	-0.0005	-0.0019	0.0017	0.0014	0.0016	0.0024	0.0025	0.0023	-0.003	0.001	0.0012	0.0013	0.0022	0.0006	0.0005
Gln_434 (M3)	0.0004	0.0027	0.0026	0.0027	0.0003	0.0002	-0.0003	-0.0001	0.0024	0.0024	0.0024	-0.0001	-0.0001	-0.0004	0.0003	0.0166	0.017	0.0172	0.0022	0.0029	0.0022	0	0.0034	0.0033	0.0033	0.0003	0.0002	0.0004	0.0002	0.0064	0.0058	0.0062	0.0012	0.0012	0.0009	0.0005	0.004	0.0047	0.0047	0.0006	0.0001	0.0003
Gln_435 (M4)	0.0002	0.0381	0.038	0.0381	0	0	0.0004	0.0001	0.0383	0.0383	0.0379	0	0.0003	-0.0003	0.0002	0.0366	0.0366	0.0368	0.0029	0.0046	0.0035	0.0002	0.038	0.038	0.038	0.0002	0.0002	0.0003	0.0002	0.0375	0.038	0.0376	0.0015	0.0012	0.0014	0	0.0379	0.0373	0.0369	0.0006	0.0005	0.0006
Gln_436 (M5)	0	0.9625	0.9624	0.9621	0.0004	0.0004	0.0003	0	0.9609	0.9613	0.961	0.0001	0.0003	0.0003	0.0001	0.9318	0.9301	0.9298	0.0015	0.0017	0.0012	0.0001	0.9586	0.9602	0.961	0.0003	0.0003	0.0002	0.0001	0.9528	0.9529	0.9522	0.0009	0.0008	0.0008	0.0001	0.9595	0.9576	0.9564	0.0007	0.0005	0.0004
Gln_437 (M6)	0	-0.0065	-0.006	-0.0056	0.0001	0	0	0	-0.0055	-0.0056	-0.0043	0.0001	0	0	-0.0001	-0.006	-0.0051	-0.0052	0	0	0	0	-0.0049	-0.0061	-0.0068	0	0	0	-0.0001	-0.006	-0.005	-0.0051	0	0.0001	0	0	-0.0071	-0.0052	-0.005	0	0	0.0001
Gln_438 (M7)	0	-0.0016	-0.0011	-0.0014	0	-0.0001	0	0.0001	-0.0006	-0.0009	-0.0014	0	0	0	0	-0.0015	-0.001	-0.0013	0	0	0	0	-0.0011	-0.0013	-0.0011	0	0	0	0	-0.0015	-0.0017	-0.0012	0	-0.0001	-0.0001	0	-0.0018	-0.0021	-0.0009	-0.0001	-0.0001	-0.0001
Gln_439 (M8)	0	0.0005	0	0.0001	0	0	0	0	0	0.0003	0	0	0.0001	0	0	0.0001	-0.0002	0	0	0	0	0	-0.0001	0.0001	0.0003	0	0	0	0	-0.0001	-0.0002	0	0	0.0001	0	0	0.0011	0.0003	0	0	0	0
Gln_440 (M9)	0	-0.0001	0	-0.0002	0	0	0	0	0.0001	0.0001	0.0001	0	0	0	0	0.0001	0.0001	0.0003	0	0	0	0	0.0001	0.0001	0	0	0	0	0	0.0001	0.0002	0.0001	0	0	0	0	-0.0003	0.0001	0.0002	0	0	0
Gln_441 (M10)	0	0.0001	0.0001	0.0002	0	0	0	0	0	0	0	0	0	0	0	0	0.0001	-0.0001	0	0	0	0	0	0	0	0	0	0	0	0	0	0.0001	0	0	0	0	0	0.0001	-0.0002	0	0	0
Glu_330 (M0)	1.004	0.0377	0.028	0.0275	0.8256	0.8264	0.8253	1.0037	0.0399	0.0396	0.04	0.8327	0.8349	0.8357	1.0027	0.0943	0.0951	0.0947	0.7114	0.6837	0.711	1.0025	0.0344	0.0348	0.0326	0.7962	0.7992	0.7969	1.003	0.0953	0.0943	0.0951	0.7122	0.7169	0.7176	1.0044	0.0588	0.0595	0.0577	0.7168	0.7659	0.7517
Glu_331 (M1)	-0.0048	0.0397	0.0283	0.0288	0.0036	0.0031	0.0039	-0.0042	0.0255	0.0257	0.0255	0.0052	0.0058	0.0053	-0.0032	0.0793	0.0822	0.0819	0.0082	0.0101	0.0087	-0.0028	0.0371	0.0364	0.0351	0.0054	0.0056	0.005	-0.0033	0.0871	0.0855	0.0872	0.0181	0.018	0.0173	-0.0047	0.0579	0.0588	0.055	0.0134	0.011	0.0122
Glu_332 (M2)	0	0.1473	0.1315	0.1309	0.1326	0.1301	0.133	-0.0002	0.125	0.1246	0.1242	0.1207	0.1179	0.1178	0.0001	0.1992	0.2029	0.2039	0.1989	0.2092	0.1988	-0.0003	0.1562	0.1524	0.1521	0.1517	0.1478	0.1521	-0.0003	0.1801	0.1798	0.18	0.1598	0.1596	0.1603	-0.0003	0.1752	0.1809	0.1711	0.1817	0.1622	0.1651
Glu_333 (M3)	0.0006	0.028	0.0287	0.0286	0.0286	0.0296	0.0282	0.0005	0.0298	0.03	0.0298	0.0232	0.0237	0.0237	0.0003	0.0215	0.0214	0.0202	0.0585	0.0687	0.058	0.0003	0.0271	0.0268	0.0274	0.0345	0.0346	0.0347	0.0004	0.0262	0.0258	0.0265	0.0698	0.0677	0.0675	0.0003	0.0277	0.0277	0.0279	0.0569	0.041	0.0474
Glu_334 (M4)	0.0001	0.7492	0.7866	0.7883	0.0094	0.0107	0.0095	0.0002	0.7835	0.7838	0.7846	0.0179	0.0176	0.0173	0.0001	0.6083	0.6019	0.6041	0.0229	0.0279	0.0237	0.0002	0.7489	0.7524	0.7563	0.0121	0.0126	0.0111	0.0002	0.6138	0.6178	0.6138	0.0401	0.0378	0.0372	0.0003	0.6826	0.6757	0.6911	0.031	0.0198	0.0236
Glu_335 (M5)	0.0001	-0.0022	-0.0032	-0.0039	0.0001	0	-0.0001	0	-0.0037	-0.0041	-0.0042	0.0001	0	0	0	-0.003	-0.0041	-0.0045	-0.0002	0	-0.0003	0	-0.0041	-0.0031	-0.0039	0	0.0001	0.0002	0	-0.0025	-0.0034	-0.0028	-0.0001	-0.0002	-0.0001	0	-0.0026	-0.0023	-0.0033	0.0001	0	-0.0003
Glu_336 (M6)	0	-0.0001	-0.0001	-0.0001	0	0.0001	0.0001	0	-0.0001	0.0001	-0.0001	0	0.0001	0.0001	-0.0001	0.0002	0.0006	-0.0004	0.0003	0.0003	0.0002	0	0.0005	0.0002	0.0003	0	0.0001	0	0	0	0	0.0001	0	0.0001	0.0001	0	0.0004	-0.0004	0.0004	0.0001	0.0001	0.0002
Glu_337 (M7)	0	0.0004	0.0004	0.0001	0.0001	0.0001	0.0001	0	0.0002	0.0003	0.0003	0.0001	0.0001	0.0001	0	0.0003	0.0002	0.0002	0.0001	0	0.0001	0	0	0.0002	0.0001	0.0001	0	0	0	0.0001	0.0001	0.0002	0.0001	0.0001	0.0001	0	0.0003	0.0003	0.0002	0.0001	0.0001	0.0001
Glu_338 (M8)	0	0.0001	0	0	0	0	0	0	0	0.0001	0.0001	0.0001	0	0	0	0.0001	-0.0001	0.0001	0	0	0	0	0.0001	0.0001	0.0001	0	0	0	0	0.0002	0.0001	0	0.0001	0	0	0	0.0001	0.0001	0	0	0	-0.0001
Glu_432 (M0)	1.0076	0.0342	0.0254	0.0259	0.8279	0.829	0.8296	1.007	0.0383	0.0377	0.0384	0.8355	0.838	0.8379	1.0072	0.0851	0.0857	0.0858	0.7131	0.6837	0.7134	1.0079	0.0316	0.0313	0.0298	0.7993	0.802	0.7974	1.0075	0.0855	0.0847	0.0853	0.7134	0.7184	0.7175	1.009	0.0536	0.0548	0.0533	0.72	0.7689	0.7522
Glu_433 (M1)	-0.0058	0.0243	0.0161	0.0157	0.0009	0.0002	0	-0.006	0.0147	0.015	0.0151	0.0015	0.0021	0.0012	-0.005	0.0527	0.0541	0.0543	0.0036	0.0047	0.0031	-0.0064	0.0221	0.0216	0.0204	0.002	0.0028	0.0034	-0.0057	0.0612	0.0592	0.0607	0.0098	0.0091	0.0094	-0.0074	0.0371	0.0373	0.0357	0.0067	0.004	0.0066
Glu_434 (M2)	-0.002	0.0292	0.0229	0.023	0.1317	0.1295	0.1318	-0.0011	0.0249	0.0243	0.0244	0.1193	0.1164	0.1173	-0.0026	0.0457	0.047	0.0467	0.1984	0.2109	0.1982	-0.0019	0.03	0.0289	0.0284	0.1511	0.1457	0.151	-0.0022	0.0555	0.0554	0.0559	0.1572	0.1583	0.1592	-0.0018	0.0466	0.0482	0.0454	0.1806	0.1603	0.1664
Glu_435 (M3)	-0.0002	0.1352	0.1215	0.1218	0.0152	0.0145	0.0147	0	0.1127	0.113	0.1119	0.0136	0.014	0.0142	0.0003	0.1874	0.1905	0.1913	0.0298	0.0348	0.03	0.0003	0.1432	0.1406	0.1408	0.0182	0.0186	0.0185	0.0004	0.1631	0.1627	0.1625	0.0411	0.0397	0.0394	0.0001	0.1535	0.1582	0.1494	0.0325	0.0261	0.0265
Glu_436 (M4)	0.0003	0.0319	0.0326	0.0328	0.0188	0.0206	0.0185	0.0001	0.0341	0.034	0.0341	0.0206	0.0202	0.0203	0	0.0241	0.0241	0.0238	0.0416	0.0493	0.0416	0.0002	0.0315	0.0313	0.0315	0.023	0.024	0.0234	0	0.0279	0.0281	0.0279	0.0532	0.0513	0.0511	0	0.0312	0.0309	0.0308	0.0429	0.0301	0.0345
Glu_437 (M5)	0	0.7514	0.7873	0.7868	0.0054	0.0062	0.0054	0.0001	0.781	0.7821	0.7819	0.0095	0.0092	0.0091	0.0001	0.6107	0.6036	0.6026	0.0137	0.0168	0.0138	0	0.747	0.7518	0.7557	0.0064	0.007	0.0062	0	0.6117	0.615	0.6122	0.0256	0.0235	0.0237	0.0001	0.6834	0.6756	0.6915	0.0174	0.0107	0.0138
Glu_438 (M6)	-0.0001	-0.0059	-0.0052	-0.0049	0	0	-0.0001	0	-0.0046	-0.0052	-0.0054	-0.0001	-0.0001	-0.0001	0	-0.0051	-0.0039	-0.0038	-0.0003	-0.0002	-0.0003	0	-0.0044	-0.004	-0.0051	-0.0002	0	-0.0001	0	-0.004	-0.0044	-0.004	-0.0001	-0.0002	-0.0003	0	-0.0047	-0.0039	-0.005	-0.0003	-0.0001	-0.0001
Glu_439 (M7)	0	-0.0004	-0.0011	-0.0014	0	0	0.0001	0	-0.0013	-0.001	-0.0003	0	0	0	0	-0.0007	-0.001	-0.0008	0	0	0.0001	0	-0.0009	-0.0016	-0.0016	0.0001	0	0	0	-0.0012	-0.0009	-0.0005	-0.0001	0	-0.0001	0	-0.0007	-0.0011	-0.0009	0.0001	0	0.0001
Glu_440 (M8)	0	0.0002	0.0005	0.0004	0	0	0	0	0.0001	0.0002	0.0001	0	0.0001	0.0001	0	0.0003	-0.0001	0	0	0	0	0	0.0001	0.0001	0	0	0.0001	0	0	0.0002	0.0002	0.0001	0	0.0001	0	0	0.0001	-0.0001	-0.0001	0	0.0001	0
Glu_441 (M9)	0	0	-0.0001	0.0001	0	0	0	0	0.0001	0	0	0	0	0	0	0	0.0001	-0.0001	0	0	0	0	0	0	0	0	0	0	0	0	0.0001	0	0	0	0	0	-0.0001	0.0001	0.0001	0	0	0
Glu_442 (M10)	0	0	0.0001	0	0	0	0	0	0	0	0	0	0	0	0	0	0	0	0	0	0	0	0	0.0001	0	0	0	0	0	0	0	0	0	0	0	0	0	0	0	0	0	0
Gly_218 (M0)	1.0018	1.0041	1.0039	1.0031	1.0032	1.003	1.0022	1.0039	1.0029	1.0047	1.0039	0.9949	0.9951	0.9955	1.0047	1.0026	1.0043	1.0036	0.9919	0.9897	0.9942	1.0051	1.0025	1.0045	1.0039	0.9494	0.9554	0.9484	1.0029	1.0034	1.0032	1.0029	0.9213	0.925	0.9247	1.0048	1.0029	1.0038	1.0049	0.9517	0.9754	0.9701
Gly_219 (M1)	-0.0018	-0.0042	-0.0044	-0.0029	-0.0024	-0.0025	-0.0023	-0.0033	-0.0027	-0.0041	-0.0034	0.0048	0.0056	0.005	-0.0049	-0.0022	-0.0039	-0.003	0.0092	0.0104	0.0062	-0.004	-0.002	-0.0044	-0.0031	0.0507	0.0449	0.0518	-0.003	-0.0024	-0.003	-0.0024	0.0798	0.0759	0.0763	-0.0034	-0.0029	-0.004	-0.0031	0.0488	0.0259	0.0315
Gly_220 (M2)	0	-0.0001	0.0003	0	-0.0006	-0.0001	-0.0001	-0.0011	-0.0005	-0.0012	-0.001	0	-0.0007	-0.0009	-0.0003	-0.0007	-0.0004	-0.0008	-0.0011	0	-0.0004	-0.0012	-0.0006	-0.0001	-0.001	-0.0005	-0.0007	-0.0006	-0.0002	-0.0011	0	-0.0005	-0.0014	-0.0014	-0.0011	-0.0016	0.0002	0.0001	-0.0022	-0.0001	-0.0016	-0.0015
Gly_221 (M3)	0.0001	0.0002	0.0003	0.0001	-0.0001	-0.0003	0.0002	0.0004	0.0004	0.0007	0.0005	0.0003	0	0.0004	0.0007	0.0005	0.0001	0.0001	0	-0.0001	0.0001	0	0.0002	0	0.0002	0.0003	0.0004	0.0003	0.0002	0.0001	-0.0003	0.0001	0.0003	0.0005	0.0001	0.0001	-0.0003	0.0003	0.0004	-0.0001	0.0004	0
Gly_222 (M4)	0.0001	0.0001	0.0001	-0.0002	0	0.0001	0.0001	0.0002	0	0.0001	0.0001	0.0001	0.0002	0	-0.0001	0	0	0.0003	0.0001	0.0002	0.0001	0.0002	0	0.0001	0.0001	0	0	0.0001	0.0001	0	0.0001	0	0	0.0001	0	0.0002	0.0001	0	0.0002	-0.0001	0.0001	0.0002
Gly_223 (M5)	-0.0002	-0.0002	-0.0001	-0.0001	-0.0001	-0.0001	-0.0001	0	-0.0002	-0.0001	-0.0002	-0.0001	-0.0002	-0.0001	-0.0002	-0.0002	-0.0002	-0.0002	-0.0002	-0.0002	-0.0002	-0.0001	0	-0.0001	-0.0001	0	0	-0.0001	0	-0.0002	0	-0.0002	0	0	0	-0.0001	-0.0001	-0.0002	-0.0002	-0.0002	-0.0002	-0.0002
Gly_246 (M0)	1.0045	1.002	1.0044	1.0046	1.0052	0.9999	1	1.0035	1.0047	1.0036	1.0024	0.9952	0.9946	0.9948	1.0042	1.0028	1.0044	1.004	0.9925	0.9929	0.9932	1.0038	1.0045	1.004	1.004	0.95	0.9557	0.9478	1.0026	1.0022	1.0032	1.0023	0.9188	0.9246	0.9228	1.0033	1.002	1.0035	1.0029	0.9502	0.9753	0.9685
Gly_247 (M1)	-0.0048	-0.0024	-0.0038	-0.0044	-0.0056	-0.0008	-0.001	-0.0035	-0.0042	-0.0033	-0.0023	-0.0039	-0.0026	-0.003	-0.0036	-0.0031	-0.0042	-0.004	-0.0026	-0.0044	-0.0046	-0.0033	-0.0051	-0.0039	-0.0035	-0.0024	-0.0033	-0.0018	-0.0023	-0.0023	-0.0041	-0.0031	0.0002	-0.002	-0.0014	-0.0034	-0.0021	-0.0037	-0.0024	-0.0018	-0.0024	-0.0015
Gly_248 (M2)	-0.0003	-0.0001	-0.0002	0.0002	-0.0003	0.0007	0.001	-0.0002	-0.0012	-0.0006	-0.0004	0.0083	0.0074	0.0081	-0.0007	0.0009	-0.0005	0.0001	0.0102	0.011	0.0116	-0.0008	0.0003	-0.0002	-0.0006	0.0523	0.0477	0.054	-0.0004	-0.0001	0.0008	0.0006	0.0813	0.0772	0.0789	0.0002	0.0001	0.0008	-0.0005	0.0513	0.0273	0.0332
Gly_249 (M3)	0.0005	0.0006	-0.0003	-0.0002	0.0007	0.0003	0.0001	0.0003	0.0007	0.0001	0.0001	0.0005	0.0005	-0.0001	0.0003	-0.0004	0.0005	-0.0001	0.0001	0.0004	-0.0001	0.0002	0.0003	0	0.0001	0	0	0	-0.0001	0.0003	0.0001	0.0002	-0.0005	0.0002	-0.0003	-0.0001	0.0003	-0.0005	0	0.0002	0.0001	-0.0001
Gly_250 (M4)	0.0001	0	0	0	0.0001	-0.0002	0	-0.0001	-0.0001	0.0002	0.0001	-0.0001	-0.0001	0	0	-0.0002	-0.0001	0.0001	-0.0002	0.0002	0	0	0	0	0	0.0001	-0.0002	0	0.0002	0	0	0	0	0	-0.0002	0	-0.0001	0	0.0002	0.0003	-0.0001	0
Gly_251 (M5)	-0.0001	-0.0001	0	-0.0002	-0.0001	0	-0.0001	0.0001	0	-0.0001	0.0001	0.0001	0.0002	0.0003	-0.0002	-0.0001	-0.0001	-0.0001	-0.0001	-0.0001	-0.0001	0.0001	0.0001	0	0.0001	0.0001	0.0002	0.0001	0	0	0	0.0001	0.0002	0.0001	0.0001	-0.0001	-0.0002	-0.0001	-0.0002	-0.0001	0	0.0001
Gly_252 (M6)	0	0	0	0	0	0	0	0	0	0	0	0	-0.0001	-0.0001	0	0	0	0	0	0	0	0	0	0	0	-0.0001	-0.0001	-0.0001	0	0	0	0	-0.0001	-0.0001	0	0	0	0	0	-0.0001	-0.0001	-0.0001
His_338 (M0)	0.8121	0.7592	0.7802	0.7879	0.977	0.9791	0.9786	0.8157	0.7914	0.7858	0.7847	0.979	0.9816	0.9798	0.825	0.7539	0.7927	0.8047	0.974	0.9764	0.9771	0.8502	0.8149	0.8171	0.8355	0.9798	0.9752	0.9761	0.8129	0.7819	0.7491	0.7567	0.9836	0.9852	0.9799	0.8441	0.7568	0.7935	0.8064	0.9827	0.9786	0.9738
His_339 (M1)	0.0059	0.0042	0.0057	0.0055	0.0055	0.0073	0.0053	0.0042	0.006	0.0049	0.005	0.0071	0.0048	0.0077	0.005	0.0016	0.0035	-0.0005	0.0055	0.0066	0.0054	0.0053	0.0041	0.0096	0.0017	0.0063	0.0111	0.0123	0.0025	0.0004	0.0075	0.006	0.0014	0.0005	0.0048	0.0046	0.0033	0.0043	0.0032	-0.0026	0.0023	0.0069
His_340 (M2)	0.0038	0.0054	0.0047	0.004	0.0047	0.0005	0.0046	0.0041	0.0061	0.0039	0.0048	0.0027	0.002	-0.0003	0.0115	0.0061	0.0062	0.0058	0.0069	0.004	0.0035	0.0048	0.0042	0.004	0.0069	0.002	0.0033	0.0019	0.0038	0.0063	0.0045	0.0066	0.004	0.0018	0.0033	0.0026	0.0072	0.0079	0.0059	0.0069	0.004	0.003
His_341 (M3)	0.0085	0.0087	0.0098	0.0101	0.0112	0.0115	0.0106	0.0094	0.0085	0.0102	0.0091	0.0116	0.0109	0.0112	0.0076	0.0104	0.0102	0.0104	0.01	0.0118	0.0133	0.0108	0.0102	0.0088	0.0089	0.0113	0.0103	0.01	0.0097	0.0098	0.0088	0.0095	0.0104	0.011	0.0108	0.0079	0.0112	0.0114	0.0083	0.0087	0.0109	0.0144
His_342 (M4)	0.003	0.0047	0.0039	0.0025	0.0013	0.0022	0.0009	0.0021	0.0021	0.0029	0.0028	0.0008	0.0015	0.0011	0.0034	0.0044	0.005	0.0022	0.0019	0.001	0.0008	0.0014	0.0015	0.0032	0.0032	0.0008	0.001	0.0008	0.0029	0.0031	0.0042	0.0033	0.001	0.0014	0.0012	0.0038	0.0048	0.0043	0.0044	0.0037	0.0025	-0.0003
His_343 (M5)	0.0087	0.0124	0.0102	0.0121	-0.0005	-0.002	-0.0003	0.0084	0.0093	0.0089	0.009	-0.0017	-0.0018	-0.0009	0.0095	0.014	0.0132	0.0131	0.0011	-0.001	-0.0005	0.0071	0.0089	0.0082	0.0073	-0.0011	-0.0016	-0.0016	0.009	0.0106	0.0118	0.0123	-0.0011	-0.0002	-0.001	0.0093	0.0153	0.0134	0.0123	-0.0008	0.0007	0.0008
His_344 (M6)	0.2123	0.2762	0.2492	0.2391	0.0011	0.0016	0.0004	0.2098	0.2373	0.2462	0.2478	0.0005	0.0013	0.0017	0.1857	0.2816	0.2278	0.2211	0.001	0.0017	0.0005	0.1619	0.2098	0.2003	0.1834	0.0013	0.0008	0.0004	0.2139	0.2524	0.2876	0.2763	0.001	0.0004	0.0013	0.172	0.271	0.2224	0.2147	0.0019	0.0015	0.0019
Ile_200 (M0)	0.9985	0.998	0.9976	0.9982	0.9978	0.9983	0.9972	0.9974	0.9979	0.998	0.9975	0.9972	0.9988	0.9979	0.9979	0.9978	0.9976	0.9974	0.9965	0.9981	0.9977	0.9976	0.9979	0.9988	0.998	0.9981	0.9983	0.9977	0.9964	0.9974	0.9978	0.997	0.997	0.9978	0.9981	0.9979	0.9966	0.9979	0.9969	0.9979	0.9982	0.9983
Ile_201 (M1)	-0.0029	-0.0027	-0.0026	-0.0023	-0.0022	-0.0027	-0.0021	-0.0022	-0.0025	-0.0029	-0.0021	-0.002	-0.0031	-0.0028	-0.0024	-0.0023	-0.0018	-0.0024	-0.0008	-0.0025	-0.0022	-0.0024	-0.0028	-0.0032	-0.0023	-0.0026	-0.0027	-0.0025	-0.0007	-0.0018	-0.002	-0.0018	-0.0016	-0.0024	-0.0026	-0.0022	-0.0014	-0.0029	-0.0017	-0.002	-0.0024	-0.0027
Ile_202 (M2)	0.0033	0.0033	0.0038	0.0029	0.0034	0.0031	0.0038	0.0037	0.0035	0.0039	0.0035	0.0036	0.0031	0.0038	0.0033	0.0034	0.0028	0.0038	0.0032	0.0035	0.0036	0.0036	0.0036	0.0032	0.0032	0.0033	0.0032	0.0036	0.0033	0.0033	0.0031	0.0038	0.0035	0.0037	0.0035	0.0035	0.0037	0.004	0.0035	0.0027	0.0029	0.0033
Ile_203 (M3)	0.0009	0.0009	0.0007	0.0011	0.0007	0.001	0.0008	0.0009	0.0008	0.0008	0.0009	0.0009	0.001	0.0008	0.0009	0.0007	0.0011	0.0009	0.0009	0.0007	0.0008	0.001	0.0009	0.001	0.0009	0.001	0.001	0.0008	0.0008	0.0007	0.0009	0.0007	0.0008	0.0007	0.0008	0.0006	0.0004	0.0006	0.0009	0.001	0.0012	0.0008
Ile_204 (M4)	0.0002	0.0002	0.0003	0.0002	0.0003	0.0002	0.0002	0.0002	0.0002	0.0002	0.0002	0.0002	0.0002	0.0002	0.0003	0.0003	0.0002	0.0002	0.0002	0.0002	0.0002	0.0002	0.0002	0.0002	0.0002	0.0002	0.0002	0.0003	0.0002	0.0003	0.0003	0.0003	0.0003	0.0002	0.0002	0.0002	0.0003	0.0002	0.0004	0.0003	0.0001	0.0002
Ile_205 (M5)	0	0	0	0	0	0	0	0	0	0	0	0	0	0	0	0	-0.0001	-0.0001	0	0	0	0	0	0	0	0	0	0	0	0	0	0	0	0	0	0	0	0	0	0	0	-0.0001
Ile_206 (M6)	0	0	0	0	0	0	0	0	0	0	0	0	0	0	0	0	0	0	0	0	0	0	0	0	0	0	0	0	0	0	0	0	0	0	0	0	0	0	0	0	0	0
Ile_207 (M7)	0	0.0002	0.0002	0	0	0	0	0	0	0	0	0	0	0	0	0.0001	0	0.0001	0	0	0	0	0	0	0	0	0	0	0	0	0	0	0	0	0	0	0.0005	0	0	0	0	0.0001
Ile_208 (M8)	0	0.0001	0.0001	0	0	0	0.0001	0	0.0001	0	0	0	0	0	0	0	0	0	0	0.0001	0	0	0	0	0	0	0	0	0	0	0	0	0	0	0	0.0001	0	0.0001	0.0001	0	0	0
Ile_274 (M0)	0.9901	0.9893	0.989	0.9885	0.9914	0.9876	0.9918	0.9899	0.9915	0.9893	0.9899	0.9878	0.9888	0.9882	0.9889	0.9895	0.9908	0.9897	0.9906	0.9883	0.99	0.9896	0.9892	0.9892	0.9898	0.9876	0.9897	0.9876	0.9883	0.9886	0.9908	0.9885	0.9903	0.9886	0.9894	0.9887	0.9899	0.9883	0.9898	0.989	0.9877	0.9907
Ile_275 (M1)	0.0101	0.0109	0.0118	0.0114	0.0093	0.0117	0.0096	0.0105	0.0097	0.0109	0.0103	0.0121	0.0119	0.0124	0.012	0.0118	0.0099	0.0105	0.0093	0.0129	0.0106	0.0105	0.0114	0.0114	0.0104	0.0131	0.0108	0.0128	0.0127	0.0109	0.0105	0.0113	0.0105	0.0117	0.0105	0.0124	0.0111	0.0133	0.0116	0.0128	0.0128	0.0101
Ile_276 (M2)	-0.0004	-0.0003	-0.0007	0.0002	-0.0017	0.0001	-0.002	-0.0007	-0.0013	-0.0003	-0.0004	0.0003	-0.0006	-0.001	-0.0009	-0.0019	-0.0002	-0.0005	0.0001	-0.0014	-0.0007	-0.0003	-0.0009	-0.001	-0.0006	-0.0007	-0.0006	-0.0007	-0.0013	0.0005	-0.0017	0.0003	-0.0014	-0.0008	-0.0002	-0.0012	-0.001	-0.0021	-0.0011	-0.002	-0.0003	-0.0005
Ile_277 (M3)	0.0003	0.0001	-0.0002	-0.0002	0.0011	0.0006	0.0006	0.0002	0	0.0001	0.0001	-0.0002	-0.0002	0.0004	0.0003	0.0005	-0.0001	0	0.0002	0.0001	0.0001	0.0002	0.0003	0.0004	0.0003	0	0.0003	0.0002	0.0003	0.0002	0.0003	-0.0001	0.0005	0.0004	0.0003	0.0001	0.0003	0.0008	-0.0003	0	-0.0001	-0.0002
Ile_278 (M4)	0	0.0001	0.0001	0.0002	0	0	0.0002	0.0001	0.0001	0	0.0001	0.0001	0.0001	0.0001	-0.0001	0.0001	-0.0003	0.0002	0	0.0002	0.0001	0.0001	0.0001	0	0.0001	0	-0.0001	0.0001	0	-0.0001	0.0001	-0.0001	0.0001	0.0001	-0.0002	0.0002	-0.0001	-0.0001	0.0001	0.0003	-0.0001	0
Ile_279 (M5)	-0.0001	-0.0001	-0.0001	-0.0002	-0.0001	-0.0001	-0.0001	0	-0.0001	0	-0.0001	0	0	-0.0001	-0.0002	-0.0001	-0.0001	0	-0.0002	-0.0001	-0.0002	0	-0.0001	-0.0001	-0.0001	0	-0.0001	0	-0.0001	0	0	-0.0001	-0.0001	-0.0001	-0.0001	-0.0001	-0.0003	-0.0003	-0.0002	-0.0001	-0.0001	-0.0001
Ile_280 (M6)	0	0	0	0	0	0	0	0	0	0	0	0	0	0	0	0	0	0	0	0	0	0	0	0	0	0	0	0	0	0	0	0	0	0	0	0	0	0	0	0	0	0
Ile_281 (M7)	0	0	0	0.0001	0	0	0	0	0	0	0	0	0.0001	0	0	0.0001	0	0	0	0.0001	0	0.0001	0.0001	0.0001	0	0	0	0	0	0	0	0.0002	0	0.0002	0.0002	0	0	0	0	0	0	0.0002
Ile_282 (M8)	0	0	0	0	0	0	0	0	0	0	0	0	0	0	0	0	0	0.0001	0	0	0	0	0	0	0	0	0	0	0	0	0	0	0	0	0	0	0	0	0	0	0.0001	0
Ile_302 (M0)	0.9917	0.9914	0.992	0.9943	0.9936	0.9909	0.9913	0.9922	0.9922	0.9937	0.9915	0.9922	0.9924	0.9927	0.991	0.9925	0.9912	0.9929	0.9937	0.9922	0.9917	0.9922	0.9918	0.9923	0.9922	0.9936	0.9928	0.9915	0.9931	0.9923	0.9924	0.9913	0.9922	0.9919	0.993	0.9919	0.996	0.9929	0.9937	0.9909	0.9934	0.9907
Ile_303 (M1)	0.0061	0.0075	0.0061	0.0044	0.0054	0.0072	0.0062	0.0069	0.0061	0.0048	0.0068	0.0065	0.0061	0.0057	0.007	0.006	0.0076	0.0051	0.0061	0.0057	0.006	0.0061	0.0069	0.0055	0.0061	0.0047	0.0044	0.0073	0.0055	0.0063	0.0068	0.0069	0.0063	0.0068	0.0055	0.0071	0.0038	0.0053	0.0042	0.0072	0.005	0.0074
Ile_304 (M2)	0.0022	0.0011	0.0017	0.0008	0.0009	0.0024	0.0026	0.0008	0.0016	0.0014	0.0017	0.0016	0.001	0.0017	0.0022	0.0013	0.0016	0.0017	0	0.0029	0.002	0.0019	0.0011	0.0026	0.0017	0.0016	0.0027	0.0014	0.0014	0.0013	0.0005	0.0021	0.0014	0.0012	0.0014	0.0006	0.0006	0.0012	0.002	0.0022	0.001	0.0019
Ile_305 (M3)	0.0001	0.0002	0	0.0005	0.0001	-0.0004	-0.0001	0	0.0001	0.0002	0	-0.0005	0.0005	-0.0001	0.0002	0.0003	-0.0002	0.0005	0.0003	-0.0009	0.0003	-0.0001	0.0002	-0.0003	0	0.0002	0.0003	-0.0004	0	0.0001	0.0003	-0.0002	-0.0001	0.0002	0.0001	0.0004	-0.0002	0.0006	0.0001	-0.0003	0.0008	0
Ile_306 (M4)	-0.0001	-0.0001	0.0003	0.0001	0.0001	-0.0001	0.0001	0.0002	0	0	0.0001	0.0002	0	0	-0.0002	0.0001	0	-0.0001	0	0.0001	0.0001	0	0	0	0	-0.0001	-0.0002	0.0002	0	0.0001	-0.0001	0	0.0002	0	0.0001	0.0001	0	0.0002	0	0.0001	-0.0001	0
Ile_307 (M5)	0	0	-0.0001	-0.0001	-0.0001	0	0	-0.0001	0	0	0	0	0	0	-0.0001	-0.0001	-0.0001	-0.0002	-0.0002	0	-0.0001	0	0	0	0	-0.0001	0	0	0	-0.0001	0	0	0	-0.0001	0	-0.0001	-0.0003	-0.0002	0	-0.0002	-0.0001	-0.0002
Ile_308 (M6)	0	0	0	0	0	0	0	0	0	0	0	0	0	0	0	0	0	0	0	0	0	0	0	0	0	0	0	0	0	0	0	0	0	0	0	0	0	0	0	0	0	0
Ile_309 (M7)	0	0	0	0	0	0	0	0	0	0	0	0	0	0	0	0	0	0	0	0	0	0	0	0	0	0	0	0	0	0	0	0	0	0	0	0	0	0	0	0	0	0
Ile_310 (M8)	0	0	0	0	0	0	0	0	0	0	0	0	0	0	0	0	0	0	0	0	0	0	0	0	0	0	0	0	0	0	0	0	0	0	0	0	0	0	0	0	0	0
Ile_311 (M9)	0	0	0	0	0	0	0	0	0	0	0	0	0	0	0	0	0	0	0	0	0	0	0	0	0	0	0	0	0	0	0	0	0	0	0	0	0	0	0	0	0	0
Ile_312 (M10)	0	0	0	0	0	0	0	0	0	0	0	0	0	0	0	0	0	0	0	0	0	0	0	0	0	0	0	0	0	0	0	0	0	0	0	0	0	0	0	0	0	0
Lac_233 (M0)	1.0039	0.9802	0.9798	0.9808	0.0625	0.0717	0.0573	1.0046	0.9913	0.9913	0.9904	0.0458	0.067	0.0519	1.005	0.9957	0.9949	0.9948	0.0567	0.0571	0.0579	1.0049	0.983	0.9832	0.9836	0.054	0.0536	0.054	1.0039	0.9587	0.957	0.9568	0.0819	0.0909	0.0874	1.0042	0.9633	0.963	0.9623	0.0835	0.0811	0.0786
Lac_234 (M1)	-0.0036	0	0	-0.0008	0.0205	0.0203	0.0207	-0.0038	-0.0022	-0.0022	-0.0008	0.0202	0.0199	0.0204	-0.0046	-0.0015	-0.0011	-0.0017	0.0206	0.0208	0.0201	-0.0048	-0.0001	0.0002	-0.0005	0.0211	0.021	0.0216	-0.0041	0.0063	0.0072	0.0077	0.0257	0.0256	0.0253	-0.0041	0.0044	0.0042	0.0048	0.0241	0.0238	0.0238
Lac_235 (M2)	-0.0005	0.0193	0.0203	0.0196	0.9206	0.9111	0.9241	-0.0009	0.0106	0.0106	0.0101	0.9376	0.9152	0.9312	-0.0009	0.0057	0.0061	0.0071	0.9249	0.9252	0.9258	-0.0006	0.0168	0.0162	0.0169	0.9285	0.9285	0.928	-0.0003	0.0344	0.0357	0.0356	0.8958	0.887	0.8902	-0.0003	0.0323	0.0326	0.033	0.8954	0.8987	0.9018
Lac_236 (M3)	0.0002	0.0004	-0.0001	0.0005	-0.0027	-0.0025	-0.001	0.0001	0.0004	0.0003	0.0003	-0.0033	-0.0019	-0.0031	0.0005	0	0	-0.0002	-0.0021	-0.0032	-0.0033	0.0006	0.0003	0.0003	-0.0001	-0.0029	-0.0031	-0.0032	0.0004	0.0005	0.0002	-0.0001	-0.0032	-0.003	-0.0024	0	0	0.0001	0	-0.0027	-0.0029	-0.0034
Lac_237 (M4)	0.0001	0.0001	0.0001	0	-0.001	-0.0008	-0.0014	0	-0.0001	0	0.0001	-0.0006	-0.0001	-0.0005	0.0001	0.0002	0.0001	0.0001	-0.0003	-0.0003	-0.0009	0	-0.0001	0	0.0001	-0.001	0.0001	-0.0006	0	0.0001	-0.0001	0	-0.0006	-0.0009	-0.0005	0.0002	0.0001	0.0002	-0.0001	-0.0005	-0.0009	-0.001
Lac_238 (M5)	-0.0001	-0.0001	-0.0001	-0.0001	0	0.0001	0.0002	0	0	0	0	0.0001	0	0	-0.0001	-0.0001	-0.0001	-0.0002	0	0.0003	0.0004	-0.0001	0	0	0	0.0001	-0.0002	0.0001	-0.0001	0	0	0	0.0001	0.0004	0	-0.0002	-0.0001	0	0.0001	0	0.0001	0.0003
Lac_239 (M6)	0	-0.0001	0	0	0.0001	0.0001	0	0	0	0	0	0.0001	0	0	0	0	0	0	0.0001	0.0001	-0.0001	0	0	-0.0001	0	0.0001	0	0.0002	0	-0.0001	-0.0001	-0.0001	0.0001	0.0001	0.0001	0	-0.0001	-0.0001	-0.0001	0.0001	0.0001	-0.0001
Lac_240 (M7)	0.0001	0.0001	0	0	0.0001	0	0	0.0001	0.0001	0	0	0	0	0.0001	0.0001	0.0001	0.0001	0.0001	0	0.0001	0.0001	0	0.0001	0.0001	0	0	0.0001	0	0.0001	0.0001	0	0	0	0	0	0.0001	0	0.0001	0.0001	0	0	0
Lac_261 (M0)	1.004	0.9786	0.9772	0.9795	0.0552	0.0644	0.0498	1.0042	0.9908	0.9908	0.9901	0.0389	0.0604	0.0444	1.0035	0.9913	0.9928	0.9926	0.0503	0.0494	0.0494	1.0034	0.9817	0.9824	0.9815	0.0466	0.0459	0.0468	1.0043	0.9567	0.956	0.9555	0.075	0.0831	0.0802	1.0033	0.9615	0.961	0.9602	0.077	0.0744	0.071
Lac_262 (M1)	-0.0045	-0.0007	-0.0001	-0.0031	0.003	0.0031	0.003	-0.0039	-0.0032	-0.003	-0.0026	0.0024	0.0025	0.0027	-0.004	-0.0003	-0.0021	-0.0008	0.0026	0.0031	0.003	-0.0036	-0.0013	-0.0009	-0.0008	0.0032	0.0036	0.0031	-0.0043	0.0024	0.003	0.0033	0.0059	0.0059	0.0058	-0.0038	0.0015	0.0017	0.0019	0.005	0.0048	0.0047
Lac_263 (M2)	-0.0002	0.0031	0.0029	0.0037	0.0291	0.0289	0.0297	-0.0008	0.0015	0.0016	0.0015	0.0294	0.0286	0.0295	-0.0004	0.0016	0.0015	0.0009	0.0294	0.03	0.0299	-0.0001	0.0033	0.0026	0.003	0.0299	0.0298	0.0298	-0.0005	0.0084	0.0088	0.0091	0.0331	0.0327	0.0331	0	0.008	0.0079	0.0088	0.0317	0.0321	0.0317
Lac_264 (M3)	0.0005	0.0187	0.0196	0.0195	0.9174	0.908	0.9206	0.0003	0.0107	0.0104	0.0108	0.9345	0.9122	0.9271	0.0005	0.0069	0.0073	0.0071	0.9213	0.9209	0.9208	0.0002	0.0161	0.0157	0.0162	0.9247	0.9248	0.9232	0.0003	0.0325	0.0321	0.032	0.8899	0.8821	0.885	0.0002	0.0289	0.0292	0.0289	0.8903	0.8936	0.8957
Lac_265 (M4)	0.0001	0	0.0002	0.0001	-0.0042	-0.0038	-0.0028	0.0001	0.0001	0.0001	0.0001	-0.0047	-0.0031	-0.0031	0	0.0002	0.0001	0	-0.0036	-0.0034	-0.0031	0	0.0001	0.0001	0	-0.0042	-0.0036	-0.0026	0.0001	-0.0001	0	0.0001	-0.0037	-0.0036	-0.0035	0.0001	0	0	-0.0001	-0.0037	-0.004	-0.0033
Lac_266 (M5)	0	0.0001	0	0	-0.0008	-0.001	-0.0006	0	0	0	0	-0.001	-0.0009	-0.0009	-0.0001	0	0	0	-0.0006	-0.0007	-0.0002	0	0	0	0	-0.0006	-0.0008	-0.0007	0	0	0	0	-0.0004	-0.0003	-0.001	0	-0.0001	0	-0.0001	-0.0008	-0.0013	-0.0001
Lac_267 (M6)	0.0003	0.0002	0.0002	0.0002	0.0003	0.0003	0.0003	0.0001	0.0001	0.0001	0.0001	0.0004	0.0002	0.0002	0.0004	0.0004	0.0004	0.0003	0.0004	0.0007	0.0003	0.0001	0.0001	0.0001	0.0002	0.0003	0.0003	0.0003	0.0001	0.0002	0.0001	0.0001	0.0001	0.0001	0.0004	0.0003	0.0003	0.0003	0.0003	0.0004	0.0003	0.0003
Lac_268 (M7)	0	-0.0001	0	0	0.0001	0.0001	0	0	0	0	0	0	0	0	-0.0001	0	-0.0001	0	0.0002	0	0	0	-0.0001	0	-0.0001	0.0001	0.0001	0	0	0	0	0	0	0	0	0	0	0	0	0.0001	0.0001	0.0001
Lac_269 (M8)	0	0	0	0	0	0	0	0	0	0	0	0	0	0	0	0	0	0	0	0	0	0	0	0	0	0	0	0	0	0	0	0	0	0	0	0	0	0	0	0	0	0
Leu_274 (M0)	0.9908	0.9932	0.9943	0.9928	0.992	0.9922	0.994	0.994	0.9931	0.9931	0.9936	0.993	0.9931	0.9915	0.993	0.9917	0.9938	0.9908	0.9935	0.9943	0.9922	0.9918	0.9933	0.9923	0.9936	0.9936	0.9918	0.993	0.9925	0.994	0.9939	0.9926	0.9918	0.993	0.9921	0.9936	0.9913	0.9946	0.9917	0.9922	0.9924	0.9934
Leu_275 (M1)	0.0101	0.0074	0.0057	0.008	0.0092	0.0085	0.0058	0.0066	0.0077	0.0078	0.0074	0.0074	0.0076	0.0087	0.0077	0.009	0.0069	0.009	0.0075	0.0065	0.0079	0.0082	0.0081	0.0072	0.0076	0.0065	0.0088	0.0076	0.0081	0.0061	0.0068	0.009	0.0092	0.0069	0.0083	0.0065	0.0101	0.0069	0.0091	0.0077	0.0078	0.0082
Leu_276 (M2)	-0.0009	-0.0013	0.0001	-0.001	-0.0009	-0.0007	0	-0.0007	-0.0009	-0.0014	-0.0011	-0.0005	-0.001	-0.0002	-0.0006	-0.0012	-0.0002	0.0002	-0.0009	-0.0011	0	0.0001	-0.0017	0.0007	-0.0011	-0.0001	-0.0006	-0.0005	-0.0004	-0.0005	-0.0006	-0.0017	-0.0014	-0.0001	-0.0007	0	-0.0018	-0.0008	-0.0014	0.0002	-0.0001	-0.002
Leu_277 (M3)	-0.0002	0.0005	-0.0001	0	-0.0003	-0.0001	0.0001	-0.0001	-0.0001	0.0003	0	0	0.0002	0	-0.0004	0.0002	-0.0004	0	0.0001	0.0005	-0.0002	-0.0002	0.0001	-0.0003	-0.0003	-0.0001	-0.0001	-0.0001	-0.0001	0.0005	0	0.0001	0.0003	0.0002	0.0002	0.0001	0.0002	-0.0006	0.0002	-0.0003	-0.0001	0.0007
Leu_278 (M4)	0.0001	0	-0.0001	0.0001	0	0	-0.0001	0	0.0001	0.0001	0.0001	0	0	0	0.0001	0.0002	0	0.0001	-0.0001	-0.0001	0	0	0.0001	0	0.0002	0	0	-0.0002	-0.0001	-0.0001	0	0.0001	0.0002	0	-0.0001	-0.0001	0.0004	0.0001	0.0001	0	0.0001	0
Leu_279 (M5)	-0.0001	0	0	0	-0.0001	-0.0001	-0.0001	0	0	0	0	-0.0001	0	0	0	-0.0001	0	-0.0001	-0.0001	-0.0001	-0.0001	-0.0001	-0.0001	0	-0.0001	-0.0001	-0.0001	0	0	-0.0001	0	-0.0001	-0.0001	0	-0.0001	0	-0.0003	-0.0002	-0.0001	-0.0001	0	-0.0003
Leu_280 (M6)	0	0	0	0	0	0	0	0	0	0	0	0	0	0	0	0	0	0	0	0	0	0	0	0	0	0	0	0	0	0	0	0	0	0	0	0	0	0	0	0	0	0
Leu_281 (M7)	0.0002	0.0002	0.0002	0.0001	0	0.0002	0.0002	0.0001	0.0001	0.0001	0.0002	0.0001	0.0002	0	0.0002	0.0002	0	0	0	0	0.0002	0.0001	0.0001	0.0001	0.0002	0.0002	0.0002	0.0001	0	0	0.0001	0	0	0	0.0002	0	0.0002	0	0.0006	0.0002	0	0
Leu_282 (M8)	0	0.0001	0	0	0	0	0.0001	0	0	0	0	0	0	0	0	0	0	0	0	0	0	0	0	0	0	0	0	0	0	0	0	0	0	0	0	0	0	0	-0.0001	0	0	0
Leu_302 (M0)	0.9877	0.99	0.9893	0.9872	0.9881	0.9906	0.9883	0.9895	0.9897	0.9894	0.9889	0.9903	0.9886	0.9902	0.9885	0.9855	0.9857	0.9865	0.9883	0.988	0.9874	0.9891	0.9906	0.9903	0.9898	0.9904	0.9883	0.9865	0.9886	0.9884	0.9891	0.99	0.9879	0.9889	0.9875	0.9875	0.9889	0.9885	0.9884	0.9862	0.9872	0.9869
Leu_303 (M1)	0.0105	0.0075	0.0087	0.0104	0.0098	0.0074	0.0088	0.0081	0.008	0.0084	0.0081	0.0078	0.0093	0.008	0.0079	0.0111	0.011	0.0097	0.0074	0.0091	0.0103	0.0086	0.0075	0.0072	0.0085	0.007	0.0093	0.0105	0.0086	0.0093	0.0087	0.0073	0.0099	0.0091	0.0097	0.0095	0.0064	0.0091	0.0093	0.0106	0.0094	0.01
Leu_304 (M2)	0.0008	0.0012	0.0009	0.0014	0.0011	0.0006	0.0024	0.002	0.0016	0.0009	0.0025	0.0015	0.0013	0.0009	0.0005	0.0009	0.0015	0.002	0.0027	0.0005	0.0012	0.0014	0.0012	0.0016	0.0008	0.0014	0.0016	0.0023	0.0016	0.0018	0.0009	0.0014	0.0012	0.0013	0.0018	0.0024	0.0022	0.0016	-0.0002	0.0018	0.0018	0.0017
Leu_305 (M3)	0.0001	0.0005	0.0004	0	0.0002	0.0001	-0.0002	0	0.0001	0.0009	0	-0.0002	0.0001	0.0003	0.0009	-0.0001	0.0001	0	0	0.0006	0.0002	0.0002	0.0002	0.0002	0.0002	0.0002	-0.0003	-0.0003	0	-0.0004	0.0004	0.0004	0.0001	-0.0002	-0.0003	-0.0006	0.0007	-0.0004	0.0007	-0.0001	-0.0004	-0.0001
Leu_306 (M4)	0	-0.0001	0	0	-0.0001	0.0002	0	-0.0001	0	-0.0001	0	0.0001	0	0	0	0.0001	0	0.0001	0.0001	-0.0001	-0.0001	0.0002	-0.0001	0.0001	0	0.0001	0.0002	0.0001	0.0001	0.0001	0	-0.0002	0.0001	0	0.0001	0.0002	-0.0001	0	-0.0002	-0.0001	0.0003	-0.0002
Leu_307 (M5)	0.001	0.001	0.0009	0.0013	0.001	0.0012	0.0009	0.0005	0.0007	0.0006	0.0007	0.0007	0.0007	0.0007	0.0023	0.0028	0.002	0.0019	0.0018	0.0021	0.0013	0.0007	0.0007	0.0006	0.0008	0.001	0.0012	0.001	0.0014	0.0009	0.0011	0.0013	0.0009	0.0011	0.0013	0.0012	0.0021	0.0015	0.0024	0.0018	0.002	0.0019
Leu_308 (M6)	-0.0001	-0.0001	-0.0001	-0.0001	-0.0001	-0.0001	-0.0002	-0.0001	-0.0001	0	-0.0001	-0.0001	0	-0.0001	-0.0001	-0.0001	-0.0001	-0.0002	-0.0002	-0.0001	-0.0002	-0.0001	-0.0001	-0.0001	-0.0001	-0.0001	-0.0002	-0.0001	-0.0001	0	-0.0002	-0.0002	-0.0001	-0.0001	-0.0001	-0.0002	-0.0002	-0.0002	-0.0002	-0.0001	-0.0002	-0.0002
Leu_309 (M7)	0	-0.0001	-0.0001	-0.0001	0	0	0	0	0	0	0	0	0	0	0	-0.0002	-0.0002	-0.0001	-0.0001	-0.0002	-0.0001	0	0	0	0	0	0	-0.0001	0	-0.0001	-0.0001	-0.0001	-0.0001	-0.0001	0	-0.0001	-0.0001	-0.0001	-0.0002	-0.0001	-0.0001	-0.0001
Leu_310 (M8)	0	0	0	0	0	0	0	0	0	0	0	0	0	0	0	0	0	0	0	0	0	0	0	0	0	0	0	0	0	0	0	0	0	0	0	0	0	0	0	0	0	0
Leu_311 (M9)	0	0	0	0	0	0	0	0	0	0	0	0	0	0	0	0	0	0	0	0	0	0	0	0	0	0	0	0	0	0	0	0	0	0	0	0	0	0	0	0	0	0
Leu_312 (M10)	0	0	0	0	0	0	0	0	0	0	0	0	0	0	0	0	0	0	0	0	0	0	0	0	0	0	0	0	0	0	0	0	0	0	0	0	0	0	0	0	0	0
Lys_431 (M0)	1.0673	1.0652	1.0652	1.0746	1.0608	1.0568	1.0535	1.0671	1.0633	1.0658	1.0655	1.0606	1.0627	1.0636	1.0645	1.0676	1.0697	1.0646	1.0602	1.0569	1.0538	1.0619	1.0651	1.0683	1.0617	1.0628	1.0622	1.0644	1.0671	1.0663	1.0646	1.0673	1.0615	1.0618	1.0611	1.0609	1.0636	1.0685	1.0703	1.0551	1.0606	1.0567
Lys_432 (M1)	-0.037	-0.0359	-0.0343	-0.0402	-0.029	-0.0225	-0.0199	-0.0362	-0.0327	-0.0363	-0.0355	-0.0301	-0.0308	-0.0331	-0.0297	-0.0317	-0.0352	-0.0333	-0.0309	-0.0264	-0.0181	-0.0298	-0.0335	-0.0369	-0.0295	-0.0318	-0.0279	-0.0346	-0.0373	-0.033	-0.0375	-0.0386	-0.0301	-0.0304	-0.0261	-0.033	-0.0329	-0.0373	-0.0394	-0.0247	-0.0302	-0.0261
Lys_433 (M2)	-0.034	-0.0331	-0.0333	-0.0396	-0.0346	-0.0377	-0.0369	-0.0346	-0.0346	-0.0338	-0.036	-0.0342	-0.0361	-0.0348	-0.0371	-0.0405	-0.0392	-0.0348	-0.0322	-0.034	-0.0391	-0.0341	-0.0351	-0.0349	-0.0369	-0.0339	-0.0365	-0.0336	-0.0341	-0.0374	-0.0312	-0.0314	-0.0338	-0.035	-0.0386	-0.0304	-0.0333	-0.0351	-0.0355	-0.0357	-0.0338	-0.0346
Lys_434 (M3)	0.0032	0.0018	0.0018	0.0044	0.0016	0.0016	0.0027	0.0028	0.0021	0.0033	0.0036	0.0023	0.0022	0.0023	0.0013	0.0042	0.0046	0.004	0.0029	0.0028	0.0036	0.0007	0.0023	0.0021	0.0023	0.0025	0.0006	0.0035	0.0032	0.0029	0.0018	0.0008	0.0013	0.0015	0.0015	0.0015	0.0034	0.0044	0.0054	0.0034	0.0019	0.0046
Lys_435 (M4)	0.0011	0.0011	0.0009	0.0015	0.0013	0.0018	0.0008	0.0008	0.0011	0.0011	0.0021	0.0009	0.0017	0.002	0.0018	0.0014	0.0011	0.0003	0.0007	0.0006	0.0007	0.0012	0.001	0.0022	0.0029	0.0006	0.0017	0.0008	0.0013	0.0016	0.0025	0.0016	0.0008	0.0019	0.0024	0.0011	-0.001	0.0004	0.0003	0.0011	0.0013	-0.001
Lys_436 (M5)	-0.0006	0	-0.0003	-0.0006	0.0001	0.0004	-0.0002	-0.0001	0.0003	-0.0002	-0.0004	0.0003	0.0001	0.0004	-0.0008	-0.001	-0.0012	-0.0009	-0.0008	0.0002	-0.0012	0.0002	0.0002	-0.0006	-0.0004	-0.0002	0.0002	-0.0005	-0.0005	-0.0006	-0.0005	0.0004	-0.0001	-0.0001	-0.0006	-0.0009	-0.0003	-0.0013	-0.0015	-0.0004	0	-0.0001
Lys_437 (M6)	-0.0001	0.0001	-0.0001	-0.0002	-0.0004	-0.0005	-0.0002	-0.0001	0.0001	0.0001	0.0005	-0.0003	-0.0002	-0.0004	-0.0001	0	0.0001	0.0001	0	-0.0002	0.0002	-0.0003	-0.0001	-0.0003	0	-0.0002	-0.0003	0	-0.0002	0.0001	0.0002	-0.0001	-0.0001	-0.0003	-0.0003	0	0.0001	0.0002	0.0005	-0.0002	-0.0003	0
Lys_438 (M7)	0.0001	-0.0001	0.0001	0.0001	0	0	0.0001	0	-0.0001	0	-0.0002	0	0	0	0.0001	0.0001	0.0001	0.0001	0.0001	0	0.0001	0	-0.0001	0.0001	0	0.0001	0	0.0001	0.0001	0	-0.0001	-0.0001	0	0	0.0001	0.0001	0	0.0001	0.0001	0.0001	0.0001	0
Lys_439 (M8)	0	0	0	0	0	0.0001	0	0	0	0	0	0	0.0001	0	0	0	0	0	0	0	0	0	0	0	0	0	0	0	0	0	0	0	0	0	0	0	0	0	-0.0001	0	0	0
Lys_440 (M9)	0	0	0	0	0	0	0	0	0	0	0	0	0	0	0	0	0	0	0	0	0	0	0	0	0	0	0	0	0	0	0	0	0	0	0	0	0	0	0	0	0	0
Lys_441 (M10)	0	0.0012	0.0003	0.0001	0	0.0001	0.0001	0	0.0005	0.0001	0.0005	0.0001	0	0	0	0	0	0	0	0	0	0	0	0	0	0	0	0	0	0	0	0	0	0	0	0	0	0	0	0	0	0
Lys_442 (M11)	0	-0.0004	-0.0001	0	0	0	0	0	-0.0001	0	-0.0001	0	0	0	0	0	0	0	0	0	0	0	0	0	0	0	0	0	0	0	0	0	0	0	0	0	0	0	0	0	0	0
Lys_443 (M12)	0.0001	0	0	0	0.0002	0	0	0.0003	0.0002	0	0.0002	0.0005	0.0004	0.0001	0	0	0	0	0	0	0	0.0004	0.0002	0	0	0.0001	0	0.0001	0.0005	0.0004	0.0001	0	0.0007	0.0007	0.0008	0.001	0.0006	0	0	0.0019	0.0009	0.0007
Mal_419 (M0)	1.0055	0.09	0.0652	0.0662	0.8006	0.8003	0.8021	1.0045	0.1407	0.1386	0.1512	0.7669	0.7606	0.7566	1.0028	0.1598	0.1581	0.1554	0.6999	0.6789	0.7044	1.0102	0.08	0.0852	0.0852	0.7737	0.7695	0.7798	1.0067	0.1592	0.1599	0.1609	0.7073	0.7124	0.7121	1.0066	0.1293	0.1342	0.1311	0.6952	0.7446	0.7216
Mal_420 (M1)	-0.008	0.0389	0.0321	0.0293	0.0124	0.0091	0.006	-0.0059	0.0226	0.0259	0.0206	0.0081	0.0062	0.0101	-0.0042	0.0735	0.0784	0.078	0.0153	0.0134	0.0088	-0.0099	0.0401	0.0388	0.0358	0.0113	0.0114	0.0088	-0.0082	0.0779	0.0782	0.0786	0.0225	0.0221	0.0207	-0.0063	0.056	0.0567	0.0601	0.0211	0.0129	0.0138
Mal_421 (M2)	0.0023	0.1307	0.118	0.1154	0.1163	0.1163	0.1209	-0.0001	0.1071	0.1047	0.1048	0.1039	0.0988	0.1026	0.0037	0.1768	0.176	0.1801	0.1746	0.1863	0.177	-0.0013	0.143	0.1373	0.1382	0.1401	0.1433	0.139	-0.0009	0.1489	0.149	0.1501	0.1342	0.1308	0.1319	-0.0005	0.1571	0.1554	0.1566	0.1531	0.1396	0.15
Mal_422 (M3)	-0.0006	0.1251	0.125	0.1248	0.0599	0.0612	0.0596	0.0001	0.1232	0.1185	0.121	0.0995	0.1068	0.1029	-0.0029	0.0702	0.073	0.0725	0.0862	0.0954	0.0894	0.0002	0.1124	0.1199	0.1187	0.0618	0.0592	0.0593	-0.0003	0.1398	0.1366	0.1387	0.1038	0.1039	0.1024	-0.0007	0.156	0.1557	0.1524	0.1078	0.0859	0.0955
Mal_423 (M4)	0.0016	0.6218	0.6595	0.669	0.009	0.0106	0.008	0.003	0.6055	0.6131	0.6069	0.0151	0.0165	0.0194	0.0013	0.5203	0.5164	0.5196	0.0225	0.0228	0.0189	0.0015	0.6275	0.6227	0.6284	0.0093	0.0117	0.0131	0.0033	0.4769	0.4805	0.4722	0.0313	0.0298	0.031	0.001	0.5078	0.5013	0.5029	0.0241	0.0167	0.0178
Mal_424 (M5)	-0.0007	-0.0069	0.001	-0.0077	0.003	0.0032	0.0037	-0.0014	-0.0011	-0.0037	-0.0055	0.0055	0.0115	0.0101	-0.0007	0.0016	-0.0019	-0.0056	0.0032	0.0035	0.0024	-0.0009	-0.004	-0.0039	-0.0068	0.0041	0.0057	0.0012	-0.0004	-0.0023	-0.0029	-0.0002	0.0011	0.0015	0.0025	0	-0.0034	-0.0009	-0.0007	-0.0016	0.0001	0.0013
Mal_425 (M6)	0	0.0003	-0.0003	0.0049	-0.0005	0.0003	0.0006	-0.0003	0.0023	0.0024	0.0024	0.0018	0.0015	-0.0005	-0.0002	-0.0021	0.0009	-0.0005	-0.0009	0.0001	-0.0003	0.0002	0.0031	0.0006	0.0025	0.0004	0.0008	-0.0005	-0.0002	0.0001	-0.0001	-0.0001	0.0003	-0.0001	0	0	-0.0026	-0.0017	-0.0026	0.0005	0.0005	0.0009
Mal_426 (M7)	0	0.0002	-0.0002	-0.0011	-0.0007	-0.0011	-0.0009	0.0002	0.0007	0.0017	-0.0017	-0.0002	-0.0018	-0.0013	0.0001	0.0006	0.0001	0.0014	-0.0009	-0.0002	-0.0006	0	-0.0012	0.0009	-0.0006	-0.0004	-0.0016	-0.0008	0	-0.0002	-0.0004	0.0006	-0.0001	-0.0001	-0.0002	0	0.0002	-0.0002	0.0004	0.0001	0	-0.0008
Mal_427 (M8)	0	0.0003	0.0001	-0.0002	0	0	-0.0001	0	-0.0006	-0.0005	0.0007	-0.0006	-0.0004	-0.0002	0	-0.0002	-0.0008	-0.0002	-0.0001	-0.0004	-0.0002	0	-0.0007	-0.0013	-0.0011	-0.0002	-0.0001	0.0001	0	0	-0.0005	-0.0002	-0.0005	-0.0004	-0.0004	0	-0.0001	-0.0002	0.0003	-0.0004	-0.0004	-0.0002
[truncated: 163 more rows]

## Sheet: timecourse unlabled parental
	TU8902 0 days #1	TU8902 0 days #2	TU8902 0 days #3	TU8902 1 day #1	TU8902 1 day #2	TU8902 1 day #3	TU8902 2 days #1	TU8902 2 days #2	TU8902 2 days #3	TU8902 3 days #1	TU8902 3 days #2	TU8902 3 days #3	TU8902 4 days #1	TU8902 4 days #2	TU8902 4 days #3	DLD 0 days #1	DLD 0 days #2	DLD 0 days #3	DLD 1 day #1	DLD 1 day #2	DLD 1 day #3	DLD 2 days #1	DLD 2 days #2	DLD 2 days #3	DLD 3 days #1	DLD 3 days #2	DLD 3 days #3	DLD 4 days #1	DLD 4 days #2	DLD 4 days #3
[truncated: 300 more rows]
